# Supplementary material for: Topographic gradients of intrinsic dynamics across neocortex
Source: eLife journal article supplement (doi:10.7554/elife.62116), 2020-12-17

a

# intrinsic networks (17-network partition)

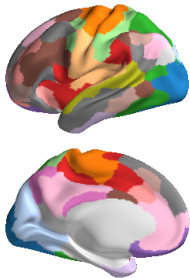

- |                |            |
|----------------|------------|
| ● VisCent      | ● LimbicA  |
| ● VisPeri      | ● ContA    |
| ● SomMotA      | ● ContB    |
| ● SomMotB      | ● ContC    |
| ● DorsAttnA    | ● DefaultA |
| ● DorsAttnB    | ● DefaultB |
| ● SalVentAttnA | ● DefaultC |
| ● SalVentAttnB | ● TempPar  |
| ● LimbicB      |            |

# temporal profile similarity

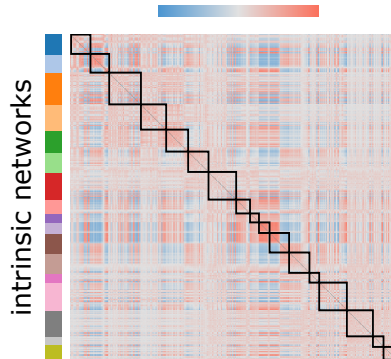

b

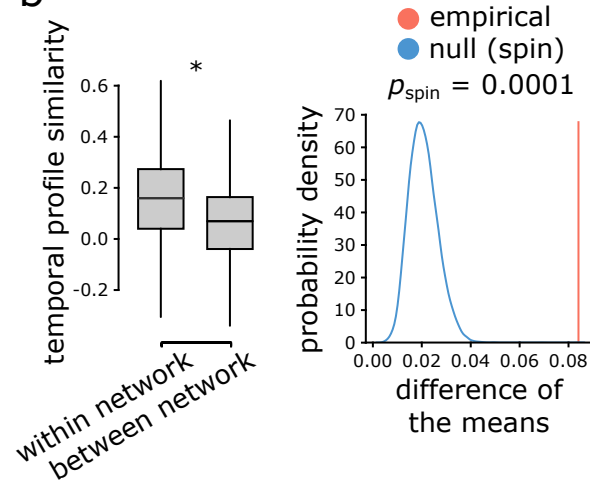

Supplement: supp [file elife_poa_e62116_Figure_2_figure_supplement_1.pdf › elife_poa_e62116_Figure_2_figure_supplement_1.pdf]
