# Supplementary material for: Topographic gradients of intrinsic dynamics across neocortex
Source: eLife. 2020 Dec 17;9:e62116. doi: 10.7554/eLife.62116 (PMC7771969; doi:10.7554/eLife.62116)
Supplement: Supplementary file 3. — The complete list of features (ranked by loading), their definitions, correlations and p-values for PC1 is presented in machine-readable format. [file elife-62116-supp3.xls]

## Sheet: pc1_rankedFeatList
CodeString	Name	Keywords	ID	MasterID	loading	correctedPval	absoluteLoading
AC_nl_023	AC_nl_023	correlation,nonlinearautocorr	172	176	0.998152	0.000122046	0.998152
AC_nl_133	AC_nl_133	correlation,nonlinearautocorr	188	192	0.998136	0.000122046	0.998136
AC_nl_013	AC_nl_013	correlation,nonlinearautocorr	171	175	0.998064	0.000122046	0.998064
SB_TransitionpAlphabet_40_1.trfexp_b	SB_TransitionpAlphabet_40_1_trfexp_b	symbolic,transitionmat	1456	739	0.998054	0.000122046	0.998054
SB_TransitionpAlphabet_40_1.maxdiagfexp_rmse	SB_TransitionpAlphabet_40_1_maxdiagfexp_rmse	symbolic,transitionmat	1454	739	0.99804	0.000122046	0.99804
AC_nl_233	AC_nl_233	correlation,nonlinearautocorr	190	194	0.998031	0.000122046	0.998031
NL_TSTL_acp_1_001_025_10_05.ac1_acpf_2	NL_TSTL_acp_1_001_025_10_05_ac1_acpf_2	nonlinear,correlation	5150	925	0.997928	0.000122046	0.997928
NL_TSTL_acp_1_001_025_10_05.ac1_acpf_3	NL_TSTL_acp_1_001_025_10_05_ac1_acpf_3	nonlinear,correlation	5154	925	0.997906	0.000122046	0.997906
AC_nl_012	AC_nl_012	correlation,nonlinearautocorr	170	174	0.99789	0.000122046	0.99789
AC_nl_113	AC_nl_113	correlation,nonlinearautocorr	186	190	0.99788	0.000122046	0.99788
AC_nl_223	AC_nl_223	correlation,nonlinearautocorr	189	193	0.997865	0.000122046	0.997865
AC_nl_122	AC_nl_122	correlation,nonlinearautocorr	187	191	0.99786	0.000122046	0.99786
MF_FitSubsegments_ss_2_uniform_25_01.fpe_min	MF_FitSubsegments_ss_2_uniform_25_01_fpe_min	model,prediction	7135	1018	-0.997827	0.000122046	0.997827
SB_TransitionpAlphabet_40_1.meandiagfexp_b	SB_TransitionpAlphabet_40_1_meandiagfexp_b	symbolic,transitionmat	1448	739	0.997723	0.000122046	0.997723
IN_AutoMutualInfoStats_40_gaussian.pextrema	IN_AutoMutualInfoStats_40_gaussian_pextrema	information,correlation,AMI	309	713	-0.997715	0.000122046	0.997715
AC_nl_034	AC_nl_034	correlation,nonlinearautocorr	175	179	0.997688	0.000122046	0.997688
AC_nl_112	AC_nl_112	correlation,nonlinearautocorr	185	189	0.997666	0.000122046	0.997666
IN_AutoMutualInfoStats_40_gaussian.pminima	IN_AutoMutualInfoStats_40_gaussian_pminima	information,correlation,AMI	314	713	-0.997644	0.000122046	0.997644
IN_AutoMutualInfoStats_40_gaussian.pmaxima	IN_AutoMutualInfoStats_40_gaussian_pmaxima	information,correlation,AMI	311	713	-0.997639	0.000122046	0.997639
MF_FitSubsegments_ar_2_uniform_25_01.fpe_min	MF_FitSubsegments_ar_2_uniform_25_01_fpe_min	model,prediction	7122	1017	-0.997628	0.000122046	0.997628
ST_LocalExtrema_n100.medianmax	ST_LocalExtrema_n100_medianmax	distribution,stationarity	3406	870	-0.99761	0.000122046	0.99761
MF_FitSubsegments_arma_2_2_uniform_25_01.fpe_min	MF_FitSubsegments_arma_2_2_uniform_25_01_fpe_min	model,prediction	7140	1019	-0.997569	0.000122046	0.997569
NL_TSTL_acp_1_001_025_10_05.ac1_acpf_4	NL_TSTL_acp_1_001_025_10_05_ac1_acpf_4	nonlinear,correlation	5158	925	0.997522	0.000122046	0.997522
AC_nl_024	AC_nl_024	correlation,nonlinearautocorr	174	178	0.997488	0.000122046	0.997488
MF_hmm_CompareNStates_06_24.meanLLtrain	MF_hmm_CompareNStates_06_24_meanLLtrain	hmm,model	7745	1050	0.997379	0.000122046	0.997379
SB_TransitionMatrix_51.TD5	SB_TransitionMatrix_51_TD5	symbolic,transitionmat	1370	734	0.997365	0.000122046	0.997365
NL_DVV_3_100_2_50_10_default.min	NL_DVV_3_100_2_50_10_default_min	delayVectorVariance	1028	646	-0.997223	0.000122046	0.997223
CO_glscf_1_10_1	CO_glscf_1_10_1	correlation,glscf	509	236	0.9972	0.000122046	0.9972
NL_DVV_3_100_2_50_10_default.mean	NL_DVV_3_100_2_50_10_default_mean	delayVectorVariance	1029	646	-0.997186	0.000122046	0.997186
SB_TransitionpAlphabet_40_1.meandiagfexp_rmse	SB_TransitionpAlphabet_40_1_meandiagfexp_rmse	symbolic,transitionmat	1450	739	0.997109	0.000122046	0.997109
CO_glscf_1_5_1	CO_glscf_1_5_1	correlation,glscf	503	230	0.997024	0.000122046	0.997024
AC_nl_014	AC_nl_014	correlation,nonlinearautocorr	173	177	0.996994	0.000122046	0.996994
NL_TSTL_acp_1_001_025_10_05.ac1_acpf_5	NL_TSTL_acp_1_001_025_10_05_ac1_acpf_5	nonlinear,correlation	5162	925	0.996892	0.000122046	0.996892
MF_FitSubsegments_ar_2_uniform_25_01.a_1_min	MF_FitSubsegments_ar_2_uniform_25_01_a_1_min	model,prediction	7127	1017	-0.99685	0.000122046	0.99685
ST_MomentCorr_002_02_median_iqr_none.density	ST_MomentCorr_002_02_median_iqr_none_density	statistics	7820	1057	0.996793	0.000122046	0.996793
SY_StdNthDerChange.fexp_rmse	SY_StdNthDerChange_rmse	entropy	2187	475	-0.996773	0.000122046	0.996773
PH_Walker_prop_01.res_ac1	PH_Walker_prop_01_res_ac1	trend	2537	811	0.99677	0.000122046	0.99677
WL_dwtcoeff_sym2_5.noisestd_l1	WL_dwtcoeff_sym2_5_noisestd_l1	wavelet,dwt	6742	1001	-0.996748	0.000122046	0.996748
SB_TransitionMatrix_41.TD4	SB_TransitionMatrix_41_TD4	symbolic,transitionmat	1353	733	0.996742	0.000122046	0.996742
CO_Embed2_Dist_tau.d_iqr	CO_Embed2_Dist_tau_d_iqr	correlation,embedding	1959	769	-0.996729	0.000122046	0.996729
FC_LocalSimple_lfit3.meanabserr	FC_LocalSimple_lfit3_meanabserr	forecasting	3099	843	-0.996716	0.000122046	0.996716
AC_nl_045	AC_nl_045	correlation,nonlinearautocorr	179	183	0.996692	0.000122046	0.996692
NL_DVV_3_100_2_50_10_default.meanDiff	NL_DVV_3_100_2_50_10_default_meanDiff	delayVectorVariance	1030	646	0.996691	0.000122046	0.996691
WL_dwtcoeff_db3_5.noisestd_l1	WL_dwtcoeff_db3_5_noisestd_l1	wavelet,dwt	6722	1000	-0.996687	0.000122046	0.996687
FC_LocalSimple_lfit3.stderr	FC_LocalSimple_lfit3_stderr	forecasting	3100	843	-0.996686	0.000122046	0.996686
WL_dwtcoeff_sym2_5.stdd_l1	WL_dwtcoeff_sym2_5_stdd_l1	wavelet,dwt	6741	1001	-0.996672	0.000122046	0.996672
WL_dwtcoeff_db3_5.stdd_l1	WL_dwtcoeff_db3_5_stdd_l1	wavelet,dwt	6721	1000	-0.996638	0.000122046	0.996638
FC_LocalSimple_lfit4.meanabserr	FC_LocalSimple_lfit4_meanabserr	forecasting	3109	844	-0.996636	0.000122046	0.996636
WL_coeffs_db3_1.mean_coeff	WL_coeffs_db3_1_mean_coeff	wavelet	6656	993	-0.996629	0.000122046	0.996629
WL_coeffs_db3_1.med_coeff	WL_coeffs_db3_1_med_coeff	wavelet	6658	993	-0.996624	0.000122046	0.996624
PH_Walker_prop_11.sw_meanabsdiff	PH_Walker_prop_11_sw_meanabsdiff	trend	2587	814	-0.996621	0.000122046	0.996621
FC_LocalSimple_mean1.meanabserr	FC_LocalSimple_mean1_meanabserr	forecasting	2990	833	-0.996608	0.000122046	0.996608
PH_Walker_prop_09.sw_meanabsdiff	PH_Walker_prop_09_sw_meanabsdiff	trend	2567	813	-0.996599	0.000122046	0.996599
SY_StdNthDer_2	SY_StdNthDer_2	entropy	752	470	-0.996587	0.000122046	0.996587
MF_hmm_08_2.LLtrainpersample	MF_hmm_08_2_LLtrainpersample	hmm,model	7741	1049	0.996579	0.000122046	0.996579
FC_LocalSimple_lfit2.meanabserr	FC_LocalSimple_lfit2_meanabserr	forecasting	3090	842	-0.996577	0.000122046	0.996577
CO_Embed2_Dist_tau.d_median	CO_Embed2_Dist_tau_d_median	correlation,embedding	1957	769	-0.996574	0.000122046	0.996574
CO_Embed2_Dist_tau.d_std	CO_Embed2_Dist_tau_d_std	correlation,embedding	1962	769	-0.996566	0.000122046	0.996566
SY_StdNthDer_1	SY_StdNthDer_1	entropy	751	469	-0.996564	0.000122046	0.996564
FC_LocalSimple_lfit4.stderr	FC_LocalSimple_lfit4_stderr	forecasting	3110	844	-0.996557	0.000122046	0.996557
SY_StdNthDer_3	SY_StdNthDer_3	entropy	753	471	-0.996548	0.000122046	0.996548
SY_StdNthDerChange.fexp_a	SY_StdNthDerChange_a	entropy	2184	475	-0.996544	0.000122046	0.996544
SY_StdNthDer_4	SY_StdNthDer_4	entropy	754	472	-0.996533	0.000122046	0.996533
EN_rpde_3_1.meanNonZero	EN_rpde_3_1_meanNonZero	entropy	861	511	-0.996529	0.000122046	0.996529
CO_Embed2_Dist_tau.d_mean	CO_Embed2_Dist_tau_d_mean	correlation,embedding	1961	769	-0.996523	0.000122046	0.996523
SY_StdNthDer_5	SY_StdNthDer_5	entropy	755	473	-0.996523	0.000122046	0.996523
SY_TISEAN_nstat_z_5_1_3.min	SY_TISEAN_nstat_z_5_1_3_min	nonlinear,tisean,model,stationarity	4931	919	-0.996515	0.000122046	0.996515
SY_StdNthDer_10	SY_StdNthDer_10	entropy	756	474	-0.99651	0.000122046	0.99651
ST_LocalExtrema_n100.medianabsmin	ST_LocalExtrema_n100_medianabsmin	distribution,stationarity	3407	870	-0.996495	0.000122046	0.996495
PH_Walker_momentum_2.sw_meanabsdiff	PH_Walker_momentum_2_sw_meanabsdiff	trend	2647	817	-0.996485	0.000122046	0.996485
PH_Walker_runningvar_15_50.sw_meanabsdiff	PH_Walker_runningvar_15_50_sw_meanabsdiff	trend	2687	819	-0.996459	0.000122046	0.996459
SY_TISEAN_nstat_z_4_1_3.min	SY_TISEAN_nstat_z_4_1_3_min	nonlinear,tisean,model,stationarity	4904	918	-0.996408	0.000122046	0.996408
FC_LocalSimple_lfit5.meanabserr	FC_LocalSimple_lfit5_meanabserr	forecasting	3119	845	-0.996385	0.000122046	0.996385
CO_glscf_1_5_2	CO_glscf_1_5_2	correlation,glscf	504	231	0.996383	0.000122046	0.996383
MF_arfit_1_8_sbc.rmsA	MF_arfit_1_8_sbc_rmsA	modelfit,arfit	6770	1002	0.996371	0.000122046	0.996371
PH_Walker_biasprop_05_01.w_mean	PH_Walker_biasprop_05_01_w_mean	trend	2598	815	0.996369	0.000122046	0.996369
MF_GP_hyperparameters_covSEiso_covNoise_1_200_first.meanS	MF_GP_hyperparameters_covSEiso_covNoise_1_200_first_meanS	model,GaussianProcess	6493	982	-0.996349	0.000122046	0.996349
SB_TransitionMatrix_41.stdeig	SB_TransitionMatrix_41_stdeig	symbolic,transitionmat	1359	733	-0.996346	0.000122046	0.996346
FC_LocalSimple_mean2.meanabserr	FC_LocalSimple_mean2_meanabserr	forecasting	2999	834	-0.996345	0.000122046	0.996345
MF_hmm_07_3.LLtrainpersample	MF_hmm_07_3_LLtrainpersample	hmm,model	7728	1048	0.996329	0.000122046	0.996329
SP_Summaries_fft_logdev.centroid	SP_Summaries_fft_logdev_centroid	spectral	4669	911	-0.996308	0.000122046	0.996308
EX_MovingThreshold_01_002.medianq	EX_MovingThreshold_01_002_medianq	outliers	3432	872	-0.996303	0.000122046	0.996303
FC_Surprise_T1_100_5_q_500.tstat	FC_Surprise_T1_100_5_q_500_tstat	information,symbolic	2303	783	-0.99629	0.000122046	0.99629
NL_TSTL_ReturnTime_005_1_005_n1_1_3.iqr	NL_TSTL_ReturnTime_005_1_005_n1_1_3_iqr	nonlinear,tstool	5782	948	0.996283	0.000122046	0.996283
AC_nl_035	AC_nl_035	correlation,nonlinearautocorr	178	182	0.996233	0.000122046	0.996233
FC_LocalSimple_lfit5.stderr	FC_LocalSimple_lfit5_stderr	forecasting	3120	845	-0.996226	0.000122046	0.996226
NL_TSTL_LargestLyap_n1_01_001_3_1_4.expfit_b	NL_TSTL_LargestLyap_n1_01_001_3_1_4_expfit_b	nonlinear,tstool	5739	945	0.996218	0.000122046	0.996218
MF_GP_hyperparameters_covSEiso_covNoise_1_200_first.minS	MF_GP_hyperparameters_covSEiso_covNoise_1_200_first_minS	model,GaussianProcess	6492	982	-0.996208	0.000122046	0.996208
ST_LocalExtrema_n50.medianabsmin	ST_LocalExtrema_n50_medianabsmin	distribution,stationarity	3385	869	-0.996181	0.000122046	0.996181
NL_DVV_3_100_2_50_10_default.trendSurr	NL_DVV_3_100_2_50_10_default_trendSurr	delayVectorVariance	1038	646	0.996181	0.000122046	0.996181
SP_Summaries_pgram_hamm.q25	SP_Summaries_pgram_hamm_q25	spectral	4280	908	-0.99615	0.000122046	0.99615
PH_Walker_biasprop_01_05.w_mean	PH_Walker_biasprop_01_05_w_mean	trend	2618	816	-0.996105	0.000122046	0.996105
MF_AR_arcov_2.a2	MF_AR_arcov_2_a2	model,fit	3839	884	-0.996104	0.000122046	0.996104
FC_LocalSimple_mean2.stderr	FC_LocalSimple_mean2_stderr	forecasting	3000	834	-0.99609	0.000122046	0.99609
CO_glscf_2_2_1	CO_glscf_2_2_1	correlation,glscf	515	242	0.996088	0.000122046	0.996088
AC_nl_134	AC_nl_134	correlation,nonlinearautocorr	150	154	0.996086	0.000122046	0.996086
SP_Summaries_welch_rect.q25	SP_Summaries_welch_rect_q25	spectral	4404	909	-0.99608	0.000122046	0.99608
SP_Summaries_fft.q25	SP_Summaries_fft_q25	spectral	4528	910	-0.996078	0.000122046	0.996078
WL_dwtcoeff_db3_5.maxd_l1	WL_dwtcoeff_db3_5_maxd_l1	wavelet,dwt	6719	1000	-0.996072	0.000122046	0.996072
SP_Summaries_pgram_hamm.median	SP_Summaries_pgram_hamm_median	spectral	4281	908	-0.996062	0.000122046	0.996062
WL_dwtcoeff_sym2_5.maxd_l1	WL_dwtcoeff_sym2_5_maxd_l1	wavelet,dwt	6739	1001	-0.996058	0.000122046	0.996058
CO_glscf_1_10_2	CO_glscf_1_10_2	correlation,glscf	510	237	0.996057	0.000122046	0.996057
WL_dwtcoeff_db3_5.noisestd_l2	WL_dwtcoeff_db3_5_noisestd_l2	wavelet,dwt	6726	1000	-0.996056	0.000122046	0.996056
CO_glscf_1_2_1	CO_glscf_1_2_1	correlation,glscf	497	224	0.996044	0.000122046	0.996044
CO_TranslateShape_circle_15_pts.mean	CO_TranslateShape_circle_15_pts_mean	correlation	1783	762	0.996029	0.000122046	0.996029
SP_Summaries_fft.fpoly2_rmse	SP_Summaries_fft_fpoly2_rmse	spectral	4557	910	0.995979	0.000122046	0.995979
SP_Summaries_welch_rect.fpoly2_rmse	SP_Summaries_welch_rect_fpoly2_rmse	spectral	4433	909	0.995979	0.000122046	0.995979
NL_TSTL_acp_1_001_025_10_05.ac1_acpf_6	NL_TSTL_acp_1_001_025_10_05_ac1_acpf_6	nonlinear,correlation	5166	925	0.995976	0.000122046	0.995976
PH_Walker_prop_05.sw_meanabsdiff	PH_Walker_prop_05_sw_meanabsdiff	trend	2547	812	-0.995967	0.000122046	0.995967
CO_glscf_1_2_2	CO_glscf_1_2_2	correlation,glscf	498	225	0.995958	0.000122046	0.995958
AC_nl_123	AC_nl_123	correlation,nonlinearautocorr	137	141	0.995952	0.000122046	0.995952
MF_FitSubsegments_ss_2_uniform_25_01.fpe_mean	MF_FitSubsegments_ss_2_uniform_25_01_fpe_mean	model,prediction	7133	1018	-0.995949	0.000122046	0.995949
MF_GP_hyperparameters_covSEiso_covPeriodic_covNoise_1_200_first.minS	MF_GP_hyperparameters_covSEiso_covPeriodic_covNoise_1_200_first_minS	model,GaussianProcess	6505	983	-0.995949	0.000122046	0.995949
AC_nl_124	AC_nl_124	correlation,nonlinearautocorr	149	153	0.995946	0.000122046	0.995946
SP_Summaries_fft.median	SP_Summaries_fft_median	spectral	4529	910	-0.995898	0.000122046	0.995898
SP_Summaries_welch_rect.median	SP_Summaries_welch_rect_median	spectral	4405	909	-0.995896	0.000122046	0.995896
CO_glscf_2_2_2	CO_glscf_2_2_2	correlation,glscf	516	243	0.995896	0.000122046	0.995896
EN_CID.CE2_norm	EN_CID_CE2_norm	entropy	873	514	-0.995873	0.000122046	0.995873
WL_dwtcoeff_sym2_5.noisestd_l2	WL_dwtcoeff_sym2_5_noisestd_l2	wavelet,dwt	6746	1001	-0.995868	0.000122046	0.995868
EN_CID.CE2	EN_CID_CE2	entropy	869	514	-0.995867	0.000122046	0.995867
ST_LocalExtrema_n100.medianabsext	ST_LocalExtrema_n100_medianabsext	distribution,stationarity	3414	870	-0.995862	0.000122046	0.995862
CO_glscf_2_5_1	CO_glscf_2_5_1	correlation,glscf	521	248	0.995847	0.000122046	0.995847
ST_LocalExtrema_n100.meanabsmin	ST_LocalExtrema_n100_meanabsmin	distribution,stationarity	3404	870	-0.99583	0.000122046	0.99583
FC_LocalSimple_median7.ac2	FC_LocalSimple_median7_ac2	forecasting	3086	841	0.99582	0.000122046	0.99582
ST_LocalExtrema_n100.meanabsext	ST_LocalExtrema_n100_meanabsext	distribution,stationarity	3413	870	-0.995819	0.000122046	0.995819
SP_Summaries_pgram_hamm.linfitloglog_all_a2	SP_Summaries_pgram_hamm_linfitloglog_all_a2	spectral	4320	908	-0.995818	0.000122046	0.995818
SB_MotifThree_quantile.ccc	SB_MotifThree_quantile_ccc	symbolic,motifs	3631	881	0.99581	0.000122046	0.99581
AC_nl_056	AC_nl_056	correlation,nonlinearautocorr	184	188	0.995809	0.000122046	0.995809
SP_Summaries_welch_rect.linfitloglog_all_a2	SP_Summaries_welch_rect_linfitloglog_all_a2	spectral	4444	909	-0.995808	0.000122046	0.995808
SP_Summaries_fft.linfitloglog_all_a2	SP_Summaries_fft_linfitloglog_all_a2	spectral	4568	910	-0.995807	0.000122046	0.995807
MF_StateSpace_n4sid_2_05_1.m_fpe	MF_StateSpace_n4sid_2_05_1_m_fpe	model	7288	1026	-0.995727	0.000122046	0.995727
SY_TISEAN_nstat_z_5_1_3.minoffdiag	SY_TISEAN_nstat_z_5_1_3_minoffdiag	nonlinear,tisean,model,stationarity	4938	919	-0.995719	0.000122046	0.995719
EX_MovingThreshold_1_002.medianq	EX_MovingThreshold_1_002_medianq	outliers	3454	874	-0.995713	0.000122046	0.995713
NW_VisibilityGraph_horiz.evparm2	NW_VisibilityGraph_horiz_evparm2	network,visibilityGraph	2024	772	-0.9957	0.000122046	0.9957
MF_FitSubsegments_arma_2_2_uniform_25_01.fpe_mean	MF_FitSubsegments_arma_2_2_uniform_25_01_fpe_mean	model,prediction	7138	1019	-0.995698	0.000122046	0.995698
SY_TISEAN_nstat_z_5_1_3.minupper	SY_TISEAN_nstat_z_5_1_3_minupper	nonlinear,tisean,model,stationarity	4937	919	-0.995676	0.000122046	0.995676
EX_MovingThreshold_01_01.medianq	EX_MovingThreshold_01_01_medianq	outliers	3421	871	-0.995672	0.000122046	0.995672
FC_LocalSimple_mean3.swm	FC_LocalSimple_mean3_swm	forecasting	3012	835	0.995669	0.000122046	0.995669
AC_nl_11	AC_nl_11	correlation,nonlinearautocorr	152	156	0.99566	0.000122046	0.99566
SP_Summaries_fft_logdev.linfitloglog_lf_a2	SP_Summaries_fft_logdev_linfitloglog_lf_a2	spectral	4697	911	-0.995648	0.000122046	0.995648
MF_GP_hyperparameters_covSEiso_covNoise_1_200_first.maxS	MF_GP_hyperparameters_covSEiso_covNoise_1_200_first_maxS	model,GaussianProcess	6491	982	-0.995617	0.000122046	0.995617
AC_nl_22	AC_nl_22	correlation,nonlinearautocorr	153	157	0.995609	0.000122046	0.995609
SC_FluctAnal_2_rsrangefit_50_1_logi.meanssr	SC_FluctAnal_2_rsrangefit_50_1_logi_meanssr	scaling	4038	898	0.995606	0.000122046	0.995606
SB_TransitionMatrix_31.stdeig	SB_TransitionMatrix_31_stdeig	symbolic,transitionmat	1346	732	-0.995594	0.000122046	0.995594
WL_dwtcoeff_db3_5.mind_l1	WL_dwtcoeff_db3_5_mind_l1	wavelet,dwt	6720	1000	0.995589	0.000122046	0.995589
MF_StateSpace_n4sid_3_05_1.m_fpe	MF_StateSpace_n4sid_3_05_1_m_fpe	model	7333	1027	-0.995588	0.000122046	0.995588
NL_DVV_3_100_2_50_10_default.trend	NL_DVV_3_100_2_50_10_default_trend	delayVectorVariance	1026	646	0.995586	0.000122046	0.995586
FC_LocalSimple_median3.meanabserr	FC_LocalSimple_median3_meanabserr	forecasting	3060	839	-0.995559	0.000122046	0.995559
MF_FitSubsegments_ar_2_uniform_25_01.fpe_mean	MF_FitSubsegments_ar_2_uniform_25_01_fpe_mean	model,prediction	7120	1017	-0.995557	0.000122046	0.995557
NW_VisibilityGraph_norm.gaussnlogL	NW_VisibilityGraph_norm_gaussnlogL	network,visibilityGraph,lengthdep	2058	773	0.995556	0.000122046	0.995556
AC_nl_135	AC_nl_135	correlation,nonlinearautocorr	145	149	0.995555	0.000122046	0.995555
WL_coeffs_db3_2.med_coeff	WL_coeffs_db3_2_med_coeff	wavelet	6668	994	-0.995542	0.000122046	0.995542
SB_MotifThree_quantile.cccc	SB_MotifThree_quantile_cccc	symbolic,motifs	3713	881	0.995532	0.000122046	0.995532
SP_Summaries_pgram_hamm.q75	SP_Summaries_pgram_hamm_q75	spectral	4282	908	-0.995528	0.000122046	0.995528
ST_LocalExtrema_l100.minmax	ST_LocalExtrema_l100_minmax	distribution,stationarity	3334	867	-0.995516	0.000122046	0.995516
SP_Summaries_pgram_hamm.fpoly2_rmse	SP_Summaries_pgram_hamm_fpoly2_rmse	spectral	4309	908	0.995515	0.000122046	0.995515
MF_StateSpaceCompOrder_8.minlossfn	MF_StateSpaceCompOrder_8_minlossfn	model	7240	1024	-0.995509	0.000122046	0.995509
FC_LocalSimple_median7.ac1	FC_LocalSimple_median7_ac1	forecasting	3085	841	0.995494	0.000122046	0.995494
CO_tc3_1.denom	CO_tc3_1_denom	correlation,nonlinear	1098	703	0.995489	0.000122046	0.995489
CO_AddNoise_1_gaussian.fitexpb	CO_AddNoise_1_gaussian_fitexpb	correlation,AMI,entropy	1269	727	-0.995481	0.000122046	0.995481
AC_nl_002	AC_nl_002	correlation,nonlinearautocorr	165	169	0.995456	0.000122046	0.995456
SY_TISEAN_nstat_z_4_1_3.minupper	SY_TISEAN_nstat_z_4_1_3_minupper	nonlinear,tisean,model,stationarity	4910	918	-0.995455	0.000122046	0.995455
DN_SimpleFit_sin3.resAC1	DN_SimpleFit_sin3_resAC1	model	3882	890	0.995432	0.000122046	0.995432
EN_SampEn_5_01_diff1.sampen1	EN_SampEn_5_01_diff1_sampen1	entropy,sampen,controlen	2734	825	-0.995428	0.000122046	0.995428
MF_CompareAR_1_10_all.minv	MF_CompareAR_1_10_all_minv	model	7363	1028	-0.995427	0.000122046	0.995427
DN_SimpleFit_sin3.resAC2	DN_SimpleFit_sin3_resAC2	model	3883	890	0.995423	0.000122046	0.995423
EN_SampEn_5_02_diff1.sampen1	EN_SampEn_5_02_diff1_sampen1	entropy,sampen,controlen	2741	826	-0.995414	0.000122046	0.995414
CO_TranslateShape_circle_25_pts.std	CO_TranslateShape_circle_25_pts_std	correlation	1796	763	-0.99541	0.000122046	0.99541
SB_MotifThree_quantile.cc	SB_MotifThree_quantile_cc	symbolic,motifs	3603	881	0.995384	0.000122046	0.995384
WL_coeffs_db3_2.mean_coeff	WL_coeffs_db3_2_mean_coeff	wavelet	6666	994	-0.995383	0.000122046	0.995383
MF_armax_2_2_05_1.fpe	MF_armax_2_2_05_1_fpe	model	7468	1032	-0.995381	0.000122046	0.995381
ST_MomentCorr_002_02_median_iqr_sqrt.density	ST_MomentCorr_002_02_median_iqr_sqrt_density	statistics	7836	1061	0.995377	0.000122046	0.995377
CO_glscf_2_5_2	CO_glscf_2_5_2	correlation,glscf	522	249	0.995376	0.000122046	0.995376
CO_glscf_1_1_2	CO_glscf_1_1_2	correlation,glscf	492	219	0.995375	0.000122046	0.995375
EX_MovingThreshold_1_01.medianq	EX_MovingThreshold_1_01_medianq	outliers	3443	873	-0.995368	0.000122046	0.995368
MF_CompareTestSets_y_ar_best_uniform_25_01_1.mabserr_median	MF_CompareTestSets_y_ar_best_uniform_25_01_1_mabserr_median	model,prediction,arfit,stationarity	7183	1021	-0.995352	0.000122046	0.995352
EX_MovingThreshold_01_002.meanq	EX_MovingThreshold_01_002_meanq	outliers	3431	872	-0.99535	0.000122046	0.99535
MF_CompareAR_1_10_all.medianv	MF_CompareAR_1_10_all_medianv	model	7365	1028	-0.995349	0.000122046	0.995349
FC_LocalSimple_mean3.meanabserr	FC_LocalSimple_mean3_meanabserr	forecasting	3009	835	-0.995342	0.000122046	0.995342
ST_LocalExtrema_n50.meanabsext	ST_LocalExtrema_n50_meanabsext	distribution,stationarity	3391	869	-0.995341	0.000122046	0.995341
WL_dwtcoeff_sym2_5.mind_l1	WL_dwtcoeff_sym2_5_mind_l1	wavelet,dwt	6740	1001	0.995341	0.000122046	0.995341
ST_MomentCorr_002_02_mean_std_none.density	ST_MomentCorr_002_02_mean_std_none_density	statistics	7816	1056	0.995341	0.000122046	0.995341
MF_arfit_1_8_sbc.C	MF_arfit_1_8_sbc_C	modelfit,arfit	6772	1002	-0.995337	0.000122046	0.995337
MF_AR_arcov_5.e	MF_AR_arcov_5_var	model,fit	3868	887	-0.995332	0.000122046	0.995332
EX_MovingThreshold_1_01.meanq	EX_MovingThreshold_1_01_meanq	outliers	3442	873	-0.995325	0.000122046	0.995325
SP_Summaries_fft.q75	SP_Summaries_fft_q75	spectral	4530	910	-0.995324	0.000122046	0.995324
SP_Summaries_welch_rect.q75	SP_Summaries_welch_rect_q75	spectral	4406	909	-0.995324	0.000122046	0.995324
EX_MovingThreshold_01_01.meanq	EX_MovingThreshold_01_01_meanq	outliers	3420	871	-0.995293	0.000122046	0.995293
MF_AR_arcov_4.e	MF_AR_arcov_4_var	model,fit	3858	886	-0.995293	0.000122046	0.995293
MF_armax_3_1_05_1.fpe	MF_armax_3_1_05_1_fpe	model	7400	1030	-0.995283	0.000122046	0.995283
NW_VisibilityGraph_norm.entropy	NW_VisibilityGraph_norm_entropy	network,visibilityGraph	2063	773	0.995277	0.000122046	0.995277
SY_TISEAN_nstat_z_4_1_3.minoffdiag	SY_TISEAN_nstat_z_4_1_3_minoffdiag	nonlinear,tisean,model,stationarity	4911	918	-0.995274	0.000122046	0.995274
MF_AR_arcov_3.a2	MF_AR_arcov_3_a2	model,fit	3846	885	-0.995266	0.000122046	0.995266
MF_StateSpace_n4sid_1_05_1.m_fpe	MF_StateSpace_n4sid_1_05_1_m_fpe	model	7250	1025	-0.995261	0.000122046	0.995261
FC_LocalSimple_mean2.swm	FC_LocalSimple_mean2_swm	forecasting	3002	834	0.995239	0.000122046	0.995239
MF_GP_LocalPrediction_covSEiso_covNoise_5_3_10_beforeafter.minerrbar	MF_GP_LocalPrediction_covSEiso_covNoise_5_3_10_beforeafter_minerrbar	model,GaussianProcess	6529	985	-0.995229	0.000122046	0.995229
SP_Summaries_pgram_hamm.iqr	SP_Summaries_pgram_hamm_iqr	spectral	4278	908	-0.995229	0.000122046	0.995229
EX_MovingThreshold_1_01.pkick	EX_MovingThreshold_1_01_pkick	outliers	3449	873	-0.995225	0.000122046	0.995225
PH_Walker_prop_11.w_ac1	PH_Walker_prop_11_w_ac1	trend	2581	814	0.995216	0.000122046	0.995216
MF_AR_arcov_3.e	MF_AR_arcov_3_var	model,fit	3849	885	-0.995202	0.000122046	0.995202
MF_AR_arcov_5.a2	MF_AR_arcov_5_a2	model,fit	3863	887	-0.9952	0.000122046	0.9952
MF_CompareAR_1_10_all.meanv	MF_CompareAR_1_10_all_meanv	model	7364	1028	-0.995192	0.000122046	0.995192
ST_LocalExtrema_n50.medianabsext	ST_LocalExtrema_n50_medianabsext	distribution,stationarity	3392	869	-0.995188	0.000122046	0.995188
MF_AR_arcov_4.a2	MF_AR_arcov_4_a2	model,fit	3854	886	-0.995181	0.000122046	0.995181
CO_glscf_1_1_1	CO_glscf_1_1_1	correlation,glscf	491	218	0.995171	0.000122046	0.995171
MF_armax_1_1_05_1.fpe	MF_armax_1_1_05_1_fpe	model	7433	1031	-0.99517	0.000122046	0.99517
MF_CompareTestSets_y_ar_best_uniform_25_01_1.mabserr_mean	MF_CompareTestSets_y_ar_best_uniform_25_01_1_mabserr_mean	model,prediction,arfit,stationarity	7182	1021	-0.995149	0.000122046	0.995149
MF_CompareTestSets_y_ss_best_uniform_25_01_1.stdrats_median	MF_CompareTestSets_y_ss_best_uniform_25_01_1_stdrats_median	model,prediction,stationarity	7215	1022	0.995142	0.000122046	0.995142
MF_CompareTestSets_y_ss_best_uniform_25_01_1.stdrats_mean	MF_CompareTestSets_y_ss_best_uniform_25_01_1_stdrats_mean	model,prediction,stationarity	7214	1022	0.995136	0.000122046	0.995136
MF_arfit_1_8_sbc.A1	MF_arfit_1_8_sbc_A1	modelfit,arfit	6759	1002	0.995135	0.000122046	0.995135
ST_LocalExtrema_n50.medianmax	ST_LocalExtrema_n50_medianmax	distribution,stationarity	3384	869	-0.995132	0.000122046	0.995132
CO_TranslateShape_circle_15_pts.threes	CO_TranslateShape_circle_15_pts_threes	correlation	1788	762	0.995119	0.000122046	0.995119
DN_SimpleFit_sin2.resAC1	DN_SimpleFit_sin2_resAC1	model	3878	889	0.995103	0.000122046	0.995103
FC_LoopLocalSimple_mean.ac2_chn	FC_LoopLocalSimple_mean_ac2_chn	forecasting	3056	838	0.995085	0.000122046	0.995085
EN_SampEn_5_02_diff1.sampen2	EN_SampEn_5_02_diff1_sampen2	entropy,sampen,controlen	2742	826	-0.995082	0.000122046	0.995082
WL_dwtcoeff_db3_5.stdd_l2	WL_dwtcoeff_db3_5_stdd_l2	wavelet,dwt	6725	1000	-0.995081	0.000122046	0.995081
SP_Summaries_pgram_hamm.linfitloglog_lf_a2	SP_Summaries_pgram_hamm_linfitloglog_lf_a2	spectral	4325	908	-0.995066	0.000122046	0.995066
MF_arfit_1_8_sbc.maxA	MF_arfit_1_8_sbc_maxA	modelfit,arfit	6765	1002	0.995058	0.000122046	0.995058
EN_SampEn_5_02_diff1.sampen0	EN_SampEn_5_02_diff1_sampen0	entropy,sampen,controlen	2740	826	-0.995058	0.000122046	0.995058
SB_MotifTwo_mean.uudu	SB_MotifTwo_mean_uudu	symbolic,motifs	3559	879	-0.995055	0.000122046	0.995055
AC_nl_14	AC_nl_14	correlation,nonlinearautocorr	151	155	0.995052	0.000122046	0.995052
FC_Surprise_T2_100_5_q_500.std	FC_Surprise_T2_100_5_q_500_std	information,symbolic	2334	787	0.995051	0.000122046	0.995051
SP_Summaries_welch_rect.linfitloglog_lf_a2	SP_Summaries_welch_rect_linfitloglog_lf_a2	spectral	4449	909	-0.995047	0.000122046	0.995047
SP_Summaries_fft.linfitloglog_lf_a2	SP_Summaries_fft_linfitloglog_lf_a2	spectral	4573	910	-0.995047	0.000122046	0.995047
DN_SimpleFit_sin2.resAC2	DN_SimpleFit_sin2_resAC2	model	3879	889	0.995031	0.000122046	0.995031
CO_Embed2_Dist_tau.d_expfit_nlogL	CO_Embed2_Dist_tau_d_expfit_nlogL	correlation,embedding	1964	769	-0.995028	0.000122046	0.995028
MF_hmm_CompareNStates_06_24.maxLLtrain	MF_hmm_CompareNStates_06_24_maxLLtrain	hmm,model	7746	1050	0.99502	0.000122046	0.99502
SP_Summaries_fft.iqr	SP_Summaries_fft_iqr	spectral	4526	910	-0.99502	0.000122046	0.99502
SP_Summaries_welch_rect.iqr	SP_Summaries_welch_rect_iqr	spectral	4402	909	-0.995015	0.000122046	0.995015
EN_SampEn_5_01_diff1.sampen0	EN_SampEn_5_01_diff1_sampen0	entropy,sampen,controlen	2733	825	-0.995004	0.000122046	0.995004
SB_MotifTwo_mean.uduu	SB_MotifTwo_mean_uduu	symbolic,motifs	3557	879	-0.994948	0.000122046	0.994948
NL_TSTL_acp_1_001_025_10_05.ac1_acpf_7	NL_TSTL_acp_1_001_025_10_05_ac1_acpf_7	nonlinear,correlation	5170	925	0.994944	0.000122046	0.994944
AC_nl_13	AC_nl_13	correlation,nonlinearautocorr	143	147	0.994932	0.000122046	0.994932
AC_nl_046	AC_nl_046	correlation,nonlinearautocorr	183	187	0.994926	0.000122046	0.994926
PH_Walker_prop_11.w_ac2	PH_Walker_prop_11_w_ac2	trend	2582	814	0.994918	0.000122046	0.994918
AC_nl_025	AC_nl_025	correlation,nonlinearautocorr	177	181	0.994913	0.000122046	0.994913
SP_Summaries_pgram_hamm.area_5_3	SP_Summaries_pgram_hamm_area_5_3	spectral	4372	908	-0.99491	0.000122046	0.99491
SY_TISEAN_nstat_z_5_1_3.minlower	SY_TISEAN_nstat_z_5_1_3_minlower	nonlinear,tisean,model,stationarity	4936	919	-0.9949	0.000122046	0.9949
MF_AR_arcov_2.e	MF_AR_arcov_2_var	model,fit	3841	884	-0.994889	0.000122046	0.994889
NL_TISEAN_fnn_mi_10_005.pfnn_5	NL_TISEAN_fnn_mi_10_005_pfnn_5	nonlinear,dimension,tisean	4843	916	-0.994886	0.000122046	0.994886
MF_CompareTestSets_y_ar_best_uniform_25_01_1.rmserr_median	MF_CompareTestSets_y_ar_best_uniform_25_01_1_rmserr_median	model,prediction,arfit,stationarity	7179	1021	-0.994876	0.000122046	0.994876
EN_Randomize_statdist.ac1fexpa	EN_Randomize_statdist_ac1fexpa	entropy,slow	2818	830	0.994863	0.000122046	0.994863
SP_Summaries_pgram_hamm.area_3_2	SP_Summaries_pgram_hamm_area_3_2	spectral	4352	908	-0.99485	0.000122046	0.99485
NL_TISEAN_fnn_mi_10_005.pfnn_6	NL_TISEAN_fnn_mi_10_005_pfnn_6	nonlinear,dimension,tisean	4844	916	-0.994845	0.000122046	0.994845
SB_TransitionMatrix_51.ondiag	SB_TransitionMatrix_51_ondiag	symbolic,transitionmat	1371	734	0.994839	0.000122046	0.994839
EX_MovingThreshold_01_01.pkick	EX_MovingThreshold_01_01_pkick	outliers	3427	871	-0.994834	0.000122046	0.994834
EN_Randomize_dyndist.ac1fexpa	EN_Randomize_dyndist_ac1fexpa	entropy,slow	2881	831	0.994827	0.000122046	0.994827
CO_TranslateShape_circle_25_pts.npatmode	CO_TranslateShape_circle_25_pts_npatmode	correlation	1798	763	0.994821	0.000122046	0.994821
CO_TranslateShape_circle_25_pts.fives	CO_TranslateShape_circle_25_pts_fives	correlation	1804	763	0.994821	0.000122046	0.994821
EN_Randomize_permute.ac1fexpa	EN_Randomize_permute_ac1fexpa	entropy,slow	2944	832	0.994819	0.000122046	0.994819
NL_DVV_3_100_2_50_10_default.max	NL_DVV_3_100_2_50_10_default_max	delayVectorVariance	1027	646	-0.994818	0.000122046	0.994818
FC_LocalSimple_median3.stderr	FC_LocalSimple_median3_stderr	forecasting	3061	839	-0.994802	0.000122046	0.994802
SB_MotifTwo_mean.ddd	SB_MotifTwo_mean_ddd	symbolic,motifs	3537	879	0.9948	0.000122046	0.9948
ST_LocalExtrema_n100.meanmax	ST_LocalExtrema_n100_meanmax	distribution,stationarity	3403	870	-0.994795	0.000122046	0.994795
EX_MovingThreshold_1_002.meanq	EX_MovingThreshold_1_002_meanq	outliers	3453	874	-0.994793	0.000122046	0.994793
MF_FitSubsegments_ar_2_uniform_25_01.a_1_mean	MF_FitSubsegments_ar_2_uniform_25_01_a_1_mean	model,prediction	7125	1017	-0.994766	0.000122046	0.994766
SY_PPtest_0_5_ar_t1.minstat	SY_PPtest_0_5_ar_t1_minstat	unitroot	7703	1043	0.994753	0.000122046	0.994753
EX_MovingThreshold_1_01.meanqover	EX_MovingThreshold_1_01_meanqover	outliers	3448	873	-0.994737	0.000122046	0.994737
SB_MotifThree_quantile.bcaa	SB_MotifThree_quantile_bcaa	symbolic,motifs	3678	881	-0.994737	0.000122046	0.994737
SB_MotifTwo_mean.dddd	SB_MotifTwo_mean_dddd	symbolic,motifs	3546	879	0.994733	0.000122046	0.994733
SB_TransitionMatrix_41.ondiag	SB_TransitionMatrix_41_ondiag	symbolic,transitionmat	1354	733	0.994729	0.000122046	0.994729
EN_Randomize_permute.ac2fexpa	EN_Randomize_permute_ac2fexpa	entropy,slow	2950	832	0.994723	0.000122046	0.994723
AC_nl_001	AC_nl_001	correlation,nonlinearautocorr	164	168	0.994719	0.000122046	0.994719
MF_FitSubsegments_ss_2_uniform_25_01.fpe_max	MF_FitSubsegments_ss_2_uniform_25_01_fpe_max	model,prediction	7134	1018	-0.994715	0.000122046	0.994715
WL_coeffs_db3_1.max_coeff	WL_coeffs_db3_1_max_coeff	wavelet	6657	993	-0.99471	0.000122046	0.99471
FC_LocalSimple_mean3.stderr	FC_LocalSimple_mean3_stderr	forecasting	3010	835	-0.994708	0.000122046	0.994708
AC_nl_12	AC_nl_12	correlation,nonlinearautocorr	136	140	0.994704	0.000122046	0.994704
CO_glscf_1_2_3	CO_glscf_1_2_3	correlation,glscf	499	226	0.994694	0.000122046	0.994694
SB_MotifTwo_mean.udu	SB_MotifTwo_mean_udu	symbolic,motifs	3542	879	-0.994694	0.000122046	0.994694
WL_dwtcoeff_sym2_5.stdd_l2	WL_dwtcoeff_sym2_5_stdd_l2	wavelet,dwt	6745	1001	-0.994683	0.000122046	0.994683
MF_steps_ahead_ar_2_6.ac1_4	MF_steps_ahead_ar_2_6_ac1_4	model,prediction	7016	1011	0.994678	0.000122046	0.994678
SP_Summaries_welch_rect.logarea_3_2	SP_Summaries_welch_rect_logarea_3_2	spectral	4477	909	-0.994666	0.000122046	0.994666
SP_Summaries_fft.logarea_3_2	SP_Summaries_fft_logarea_3_2	spectral	4601	910	-0.994666	0.000122046	0.994666
SY_SpreadRandomLocal_50_100.meanac1	SY_SpreadRandomLocal_50_100_meanac1	stationarity	2116	478	0.994658	0.000122046	0.994658
DN_SimpleFit_sin1.resAC1	DN_SimpleFit_sin1_resAC1	model	3874	888	0.994647	0.000122046	0.994647
SP_Summaries_welch_rect.area_3_2	SP_Summaries_welch_rect_area_3_2	spectral	4476	909	-0.994644	0.000122046	0.994644
SP_Summaries_fft.area_3_2	SP_Summaries_fft_area_3_2	spectral	4600	910	-0.994644	0.000122046	0.994644
NL_TSTL_acp_1_001_025_10_05.ac1_acpf_1	NL_TSTL_acp_1_001_025_10_05_ac1_acpf_1	nonlinear,correlation	5146	925	0.994635	0.000122046	0.994635
CO_tc3_2.denom	CO_tc3_2_denom	correlation,nonlinear	1103	704	0.994633	0.000122046	0.994633
AC_nl_24	AC_nl_24	correlation,nonlinearautocorr	144	148	0.994626	0.000122046	0.994626
AC_nl_33	AC_nl_33	correlation,nonlinearautocorr	154	158	0.994626	0.000122046	0.994626
MF_CompareTestSets_y_ar_best_uniform_25_01_1.rmserr_mean	MF_CompareTestSets_y_ar_best_uniform_25_01_1_rmserr_mean	model,prediction,arfit,stationarity	7178	1021	-0.994625	0.000122046	0.994625
SP_Summaries_fft.area_5_3	SP_Summaries_fft_area_5_3	spectral	4620	910	-0.994613	0.000122046	0.994613
SP_Summaries_welch_rect.area_5_3	SP_Summaries_welch_rect_area_5_3	spectral	4496	909	-0.994613	0.000122046	0.994613
SP_Summaries_pgram_hamm.logarea_3_2	SP_Summaries_pgram_hamm_logarea_3_2	spectral	4353	908	-0.994605	0.000122046	0.994605
MF_steps_ahead_ar_2_6.ac1_3	MF_steps_ahead_ar_2_6_ac1_3	model,prediction	7013	1011	0.994597	0.000122046	0.994597
SP_Summaries_fft.logarea_5_3	SP_Summaries_fft_logarea_5_3	spectral	4621	910	-0.994589	0.000122046	0.994589
SP_Summaries_welch_rect.logarea_5_3	SP_Summaries_welch_rect_logarea_5_3	spectral	4497	909	-0.994589	0.000122046	0.994589
SP_Summaries_pgram_hamm.logarea_5_3	SP_Summaries_pgram_hamm_logarea_5_3	spectral	4373	908	-0.994583	0.000122046	0.994583
PH_Walker_biasprop_01_05.sw_meanabsdiff	PH_Walker_biasprop_01_05_sw_meanabsdiff	trend	2627	816	-0.994576	0.000122046	0.994576
EN_Randomize_dyndist.ac2fexpa	EN_Randomize_dyndist_ac2fexpa	entropy,slow	2887	831	0.99457	0.000122046	0.99457
SP_Summaries_pgram_hamm.area_4_2	SP_Summaries_pgram_hamm_area_4_2	spectral	4360	908	-0.994561	0.000122046	0.994561
EN_Randomize_permute.xcn1fexpa	EN_Randomize_permute_xcn1fexpa	entropy,slow	2926	832	0.994541	0.000122046	0.994541
SP_Summaries_welch_rect.peakPower_prom2	SP_Summaries_welch_rect_peakPower_prom2	spectral	4397	909	0.994532	0.000122046	0.994532
SP_Summaries_fft.peakPower_prom2	SP_Summaries_fft_peakPower_prom2	spectral	4521	910	0.994531	0.000122046	0.994531
EN_Randomize_dyndist.xc1fexpa	EN_Randomize_dyndist_xc1fexpa	entropy,slow	2869	831	0.994529	0.000122046	0.994529
EN_Randomize_statdist.ac2fexpa	EN_Randomize_statdist_ac2fexpa	entropy,slow	2824	830	0.994518	0.000122046	0.994518
PH_Walker_prop_01.sw_propcross	PH_Walker_prop_01_sw_propcross	trend	2532	811	-0.994514	0.000122046	0.994514
EN_Randomize_permute.xc1fexpa	EN_Randomize_permute_xc1fexpa	entropy,slow	2932	832	0.994509	0.000122046	0.994509
CO_glscf_2_2_3	CO_glscf_2_2_3	correlation,glscf	517	244	0.994508	0.000122046	0.994508
MF_CompareTestSets_y_ar_4_rand_25_01_1.stdrats_median	MF_CompareTestSets_y_ar_4_rand_25_01_1_stdrats_median	model,prediction,stationarity	7175	1020	0.994508	0.000122046	0.994508
SY_SpreadRandomLocal_50_100.meanac2	SY_SpreadRandomLocal_50_100_meanac2	stationarity	2117	478	0.994497	0.000122046	0.994497
NW_VisibilityGraph_norm.expnlogL	NW_VisibilityGraph_norm_expnlogL	network,visibilityGraph,lengthdep	2059	773	0.99449	0.000122046	0.99449
EN_Randomize_statdist.xcn1fexpa	EN_Randomize_statdist_xcn1fexpa	entropy,slow	2800	830	0.994482	0.000122046	0.994482
CO_glscf_1_1_3	CO_glscf_1_1_3	correlation,glscf	493	220	0.994479	0.000122046	0.994479
SB_TransitionMatrix_31.ondiag	SB_TransitionMatrix_31_ondiag	symbolic,transitionmat	1341	732	0.994475	0.000122046	0.994475
EN_Randomize_statdist.xc1fexpa	EN_Randomize_statdist_xc1fexpa	entropy,slow	2806	830	0.994468	0.000122046	0.994468
EN_Randomize_dyndist.xcn1fexpa	EN_Randomize_dyndist_xcn1fexpa	entropy,slow	2863	831	0.994462	0.000122046	0.994462
DN_SimpleFit_sin1.resAC2	DN_SimpleFit_sin1_resAC2	model	3875	888	0.994454	0.000122046	0.994454
MF_CompareTestSets_y_ar_4_rand_25_01_1.stdrats_mean	MF_CompareTestSets_y_ar_4_rand_25_01_1_stdrats_mean	model,prediction,stationarity	7174	1020	0.994445	0.000122046	0.994445
SP_Summaries_fft_logdev.fpolysat_b	SP_Summaries_fft_logdev_fpolysat_b	spectral	4683	911	-0.994436	0.000122046	0.994436
SP_Summaries_pgram_hamm.linfitsemilog_all_a2	SP_Summaries_pgram_hamm_linfitsemilog_all_a2	spectral	4340	908	-0.994429	0.000122046	0.994429
MF_CompareTestSets_y_ss_2_uniform_25_01_1.mabserr_median	MF_CompareTestSets_y_ss_2_uniform_25_01_1_mabserr_median	model,prediction,stationarity	7223	1023	-0.99442	0.000122046	0.99442
MF_steps_ahead_ar_2_6.ac1_5	MF_steps_ahead_ar_2_6_ac1_5	model,prediction	7019	1011	0.99441	0.000122046	0.99441
MF_CompareTestSets_y_ss_2_uniform_25_01_1.rmserr_median	MF_CompareTestSets_y_ss_2_uniform_25_01_1_rmserr_median	model,prediction,stationarity	7219	1023	-0.994407	0.000122046	0.994407
SB_MotifThree_quantile.aacb	SB_MotifThree_quantile_aacb	symbolic,motifs	3640	881	-0.994403	0.000122046	0.994403
SP_Summaries_pgram_hamm.area_4_3	SP_Summaries_pgram_hamm_area_4_3	spectral	4362	908	-0.994399	0.000122046	0.994399
NL_MS_nlpe_2_mi.msqerr	NL_MS_nlpe_2_mi_msqerr	nonlinear,prediction,model	6828	1004	-0.994398	0.000122046	0.994398
SP_Summaries_pgram_hamm.area_5_4	SP_Summaries_pgram_hamm_area_5_4	spectral	4374	908	-0.994386	0.000122046	0.994386
PH_Walker_prop_11.w_std	PH_Walker_prop_11_w_std	trend	2580	814	-0.994386	0.000122046	0.994386
SP_Summaries_fft.logarea_4_2	SP_Summaries_fft_logarea_4_2	spectral	4609	910	-0.994379	0.000122046	0.994379
SP_Summaries_welch_rect.logarea_4_2	SP_Summaries_welch_rect_logarea_4_2	spectral	4485	909	-0.994379	0.000122046	0.994379
SP_Summaries_pgram_hamm.logarea_4_2	SP_Summaries_pgram_hamm_logarea_4_2	spectral	4361	908	-0.994369	0.000122046	0.994369
SP_Summaries_fft.area_4_1	SP_Summaries_fft_area_4_1	spectral	4606	910	0.994361	0.000122046	0.994361
SP_Summaries_welch_rect.area_4_1	SP_Summaries_welch_rect_area_4_1	spectral	4482	909	0.994361	0.000122046	0.994361
SY_SlidingWindow_s_sampen10_10	SY_SlidingWindow_s_sampen10_10	stationarity	594	321	0.994338	0.000122046	0.994338
NL_embed_PCA_1_10.min	NL_embed_PCA_1_10_min	embedding,pca	6964	1008	-0.994327	0.000122046	0.994327
SP_Summaries_welch_rect.area_4_2	SP_Summaries_welch_rect_area_4_2	spectral	4484	909	-0.994312	0.000122046	0.994312
SP_Summaries_fft.area_4_2	SP_Summaries_fft_area_4_2	spectral	4608	910	-0.994312	0.000122046	0.994312
AC_nl_003	AC_nl_003	correlation,nonlinearautocorr	166	170	0.994306	0.000122046	0.994306
EN_SampEn_5_01_diff1.sampen2	EN_SampEn_5_01_diff1_sampen2	entropy,sampen,controlen	2735	825	-0.994301	0.000122046	0.994301
SP_Summaries_fft.logarea_4_3	SP_Summaries_fft_logarea_4_3	spectral	4611	910	-0.994283	0.000122046	0.994283
SP_Summaries_welch_rect.logarea_4_3	SP_Summaries_welch_rect_logarea_4_3	spectral	4487	909	-0.994283	0.000122046	0.994283
MF_CompareTestSets_y_ss_2_uniform_25_01_1.mabserr_mean	MF_CompareTestSets_y_ss_2_uniform_25_01_1_mabserr_mean	model,prediction,stationarity	7222	1023	-0.994277	0.000122046	0.994277
SB_MotifTwo_median.uudu	SB_MotifTwo_median_uudu	symbolic,motifs	3591	880	-0.994272	0.000122046	0.994272
SP_Summaries_pgram_hamm.spect_shann_ent	SP_Summaries_pgram_hamm_spect_shann_ent	spectral	4314	908	-0.994268	0.000122046	0.994268
SP_Summaries_pgram_hamm.spect_shann_ent_norm	SP_Summaries_pgram_hamm_spect_shann_ent_norm	spectral	4315	908	-0.994268	0.000122046	0.994268
NW_VisibilityGraph_norm.stdk	NW_VisibilityGraph_norm_stdk	network,visibilityGraph	2035	773	0.994264	0.000122046	0.994264
NW_VisibilityGraph_horiz.evnlogL	NW_VisibilityGraph_horiz_evnlogL	network,visibilityGraph,lengthdep	2025	772	-0.994257	0.000122046	0.994257
MF_CompareTestSets_y_ss_2_uniform_25_01_1.rmserr_mean	MF_CompareTestSets_y_ss_2_uniform_25_01_1_rmserr_mean	model,prediction,stationarity	7218	1023	-0.99425	0.000122046	0.99425
ST_LocalExtrema_n50.meanabsmin	ST_LocalExtrema_n50_meanabsmin	distribution,stationarity	3382	869	-0.994244	0.000122046	0.994244
NL_MS_nlpe_3_ac.msqerr	NL_MS_nlpe_3_ac_msqerr	nonlinear,prediction,model	6855	1005	-0.994243	0.000122046	0.994243
PH_Walker_prop_11.sw_distdiff	PH_Walker_prop_11_sw_distdiff	trend	2594	814	-0.994233	0.000122046	0.994233
EX_MovingThreshold_01_01.meanqover	EX_MovingThreshold_01_01_meanqover	outliers	3426	871	-0.994232	0.000122046	0.994232
ST_LocalExtrema_n25.medianabsext	ST_LocalExtrema_n25_medianabsext	distribution,stationarity	3370	868	-0.994225	0.000122046	0.994225
NL_embed_PCA_1_10.perc_5	NL_embed_PCA_1_10_perc_5	embedding,pca	6961	1008	-0.994224	0.000122046	0.994224
SP_Summaries_welch_rect.area_5_1	SP_Summaries_welch_rect_area_5_1	spectral	4492	909	0.994221	0.000122046	0.994221
SP_Summaries_fft.area_5_1	SP_Summaries_fft_area_5_1	spectral	4616	910	0.994221	0.000122046	0.994221
MF_steps_ahead_ar_2_6.ac1_6	MF_steps_ahead_ar_2_6_ac1_6	model,prediction	7022	1011	0.994214	0.000122046	0.994214
SP_Summaries_welch_rect.area_4_3	SP_Summaries_welch_rect_area_4_3	spectral	4486	909	-0.994207	0.000122046	0.994207
SP_Summaries_fft.area_4_3	SP_Summaries_fft_area_4_3	spectral	4610	910	-0.994207	0.000122046	0.994207
SP_Summaries_welch_rect.logarea_5_4	SP_Summaries_welch_rect_logarea_5_4	spectral	4499	909	-0.994201	0.000122046	0.994201
SP_Summaries_fft.logarea_5_4	SP_Summaries_fft_logarea_5_4	spectral	4623	910	-0.994201	0.000122046	0.994201
SP_Summaries_welch_rect.area_3_1	SP_Summaries_welch_rect_area_3_1	spectral	4474	909	0.994191	0.000122046	0.994191
SP_Summaries_fft.area_3_1	SP_Summaries_fft_area_3_1	spectral	4598	910	0.994191	0.000122046	0.994191
EX_MovingThreshold_01_002.pkick	EX_MovingThreshold_01_002_pkick	outliers	3438	872	-0.99417	0.000122046	0.99417
SP_Summaries_welch_rect.area_5_4	SP_Summaries_welch_rect_area_5_4	spectral	4498	909	-0.994163	0.000122046	0.994163
SP_Summaries_fft.area_5_4	SP_Summaries_fft_area_5_4	spectral	4622	910	-0.994163	0.000122046	0.994163
SB_MotifThree_quantile.bbca	SB_MotifThree_quantile_bbca	symbolic,motifs	3675	881	-0.994159	0.000122046	0.994159
AC_nl_246	AC_nl_246	correlation,nonlinearautocorr	146	150	0.994142	0.000122046	0.994142
SY_PPtest_0_5_ar_t1.meanstat	SY_PPtest_0_5_ar_t1_meanstat	unitroot	7701	1043	0.994134	0.000122046	0.994134
CO_glscf_1_5_3	CO_glscf_1_5_3	correlation,glscf	505	232	0.994118	0.000122046	0.994118
SB_MotifThree_quantile.acbc	SB_MotifThree_quantile_acbc	symbolic,motifs	3656	881	-0.994113	0.000122046	0.994113
MF_steps_ahead_ar_2_6.ac1_2	MF_steps_ahead_ar_2_6_ac1_2	model,prediction	7010	1011	0.994108	0.000122046	0.994108
ST_MomentCorr_002_02_mean_std_sqrt.density	ST_MomentCorr_002_02_mean_std_sqrt_density	statistics	7832	1060	0.994105	0.000122046	0.994105
SP_Summaries_welch_rect.linfitloglog_hf_a1	SP_Summaries_welch_rect_linfitloglog_hf_a1	spectral	4453	909	-0.994099	0.000122046	0.994099
SP_Summaries_fft.linfitloglog_hf_a1	SP_Summaries_fft_linfitloglog_hf_a1	spectral	4577	910	-0.994093	0.000122046	0.994093
SP_Summaries_fft.logarea_2_2	SP_Summaries_fft_logarea_2_2	spectral	4595	910	-0.99408	0.000122046	0.99408
SP_Summaries_welch_rect.logarea_2_2	SP_Summaries_welch_rect_logarea_2_2	spectral	4471	909	-0.99408	0.000122046	0.99408
MF_steps_ahead_arma_3_1_6.ac1_5	MF_steps_ahead_arma_3_1_6_ac1_5	model,prediction	7088	1014	0.994078	0.000122046	0.994078
MF_steps_ahead_arma_3_1_6.ac1_6	MF_steps_ahead_arma_3_1_6_ac1_6	model,prediction	7091	1014	0.994072	0.000122046	0.994072
NL_TSTL_LargestLyap_n1_01_001_3_1_4.p2	NL_TSTL_LargestLyap_n1_01_001_3_1_4_p2	nonlinear,tstool	5714	945	-0.99406	0.000122046	0.99406
SP_Summaries_pgram_hamm.logarea_4_3	SP_Summaries_pgram_hamm_logarea_4_3	spectral	4363	908	-0.994047	0.000122046	0.994047
NL_DVV_3_100_2_50_10_default.stdDiff	NL_DVV_3_100_2_50_10_default_stdDiff	delayVectorVariance	1031	646	-0.994042	0.000122046	0.994042
ST_LocalExtrema_n100.stdext	ST_LocalExtrema_n100_stdext	distribution,stationarity	3411	870	-0.994033	0.000122046	0.994033
SB_MotifTwo_median.uduu	SB_MotifTwo_median_uduu	symbolic,motifs	3589	880	-0.994028	0.000122046	0.994028
NL_embed_PCA_1_10.top2	NL_embed_PCA_1_10_top2	embedding,pca	6965	1008	0.994019	0.000122046	0.994019
MF_steps_ahead_ar_best_6.ac1_6	MF_steps_ahead_ar_best_6_ac1_6	model,prediction,arfit	7045	1012	0.994011	0.000122046	0.994011
SB_MotifThree_quantile.bcba	SB_MotifThree_quantile_bcba	symbolic,motifs	3681	881	-0.994002	0.000122046	0.994002
SP_Summaries_pgram_hamm.fpoly2_sse	SP_Summaries_pgram_hamm_fpoly2_sse	spectral	4307	908	0.994	0.000122046	0.994
NW_VisibilityGraph_horiz.evparm1	NW_VisibilityGraph_horiz_evparm1	network,visibilityGraph	2023	772	-0.993997	0.000122046	0.993997
AC_1	AC_1	correlation	93	92	0.993994	0.000122046	0.993994
PH_Walker_biasprop_05_01.sw_meanabsdiff	PH_Walker_biasprop_05_01_sw_meanabsdiff	trend	2607	815	-0.993989	0.000122046	0.993989
SP_Summaries_fft.logarea_3_3	SP_Summaries_fft_logarea_3_3	spectral	4603	910	-0.993982	0.000122046	0.993982
SP_Summaries_welch_rect.logarea_3_3	SP_Summaries_welch_rect_logarea_3_3	spectral	4479	909	-0.993982	0.000122046	0.993982
SP_Summaries_fft_logdev.logarea_5_1	SP_Summaries_fft_logdev_logarea_5_1	spectral	4741	911	0.993981	0.000122046	0.993981
EX_MovingThreshold_1_002.meanqover	EX_MovingThreshold_1_002_meanqover	outliers	3459	874	-0.993981	0.000122046	0.993981
SY_TISEAN_nstat_z_4_1_3.minlower	SY_TISEAN_nstat_z_4_1_3_minlower	nonlinear,tisean,model,stationarity	4909	918	-0.993967	0.000122046	0.993967
EX_MovingThreshold_1_002.pkick	EX_MovingThreshold_1_002_pkick	outliers	3460	874	-0.993964	0.000122046	0.993964
SP_Summaries_pgram_hamm.area_5_5	SP_Summaries_pgram_hamm_area_5_5	spectral	4376	908	-0.993957	0.000122046	0.993957
FC_LocalSimple_meantau.ac1	FC_LocalSimple_meantau_ac1	forecasting	3034	837	0.993947	0.000122046	0.993947
NL_MS_nlpe_fnn_mi.msqerr	NL_MS_nlpe_fnn_mi_msqerr	nonlinear,prediction,model,slow	6882	1006	-0.993932	0.000122046	0.993932
FC_Surprise_T1_100_5_q_500.lq	FC_Surprise_T1_100_5_q_500_lq	information,symbolic	2300	783	-0.993929	0.000122046	0.993929
SP_Summaries_pgram_hamm.area_2_2	SP_Summaries_pgram_hamm_area_2_2	spectral	4346	908	-0.993927	0.000122046	0.993927
SP_Summaries_welch_rect.logarea_4_4	SP_Summaries_welch_rect_logarea_4_4	spectral	4489	909	-0.993926	0.000122046	0.993926
SP_Summaries_fft.logarea_4_4	SP_Summaries_fft_logarea_4_4	spectral	4613	910	-0.993926	0.000122046	0.993926
EN_mse_1-10_2_015_diff1.cvSampEn	EN_mse_1-10_2_015_diff1_cvSampEn	entropy,sampen,controlen,mse	2780	828	-0.993922	0.000122046	0.993922
SP_Summaries_welch_rect.logarea_5_5	SP_Summaries_welch_rect_logarea_5_5	spectral	4501	909	-0.993919	0.000122046	0.993919
SP_Summaries_fft.logarea_5_5	SP_Summaries_fft_logarea_5_5	spectral	4625	910	-0.993919	0.000122046	0.993919
SY_SpreadRandomLocal_100_100.meanac1	SY_SpreadRandomLocal_100_100_meanac1	stationarity	2132	479	0.993915	0.000122046	0.993915
SP_Summaries_pgram_hamm.logarea_2_2	SP_Summaries_pgram_hamm_logarea_2_2	spectral	4347	908	-0.993911	0.000122046	0.993911
SP_Summaries_pgram_hamm.area_4_4	SP_Summaries_pgram_hamm_area_4_4	spectral	4364	908	-0.993908	0.000122046	0.993908
CO_AddNoise_1_even_10.fitexpb	CO_AddNoise_1_even_10_fitexpb	correlation,AMI,entropy	1194	723	-0.993905	0.000122046	0.993905
SP_Summaries_pgram_hamm.logarea_5_4	SP_Summaries_pgram_hamm_logarea_5_4	spectral	4375	908	-0.993899	0.000122046	0.993899
SP_Summaries_pgram_hamm.area_3_3	SP_Summaries_pgram_hamm_area_3_3	spectral	4354	908	-0.993897	0.000122046	0.993897
CO_AddNoise_1_gaussian.ami_at_20	CO_AddNoise_1_gaussian_ami_at_20	correlation,AMI,entropy	1267	727	0.993885	0.000122046	0.993885
SC_FluctAnal_2_dfa_50_1_logi.meanssr	SC_FluctAnal_2_dfa_50_1_logi_meanssr	scaling	4086	900	0.993862	0.000122046	0.993862
MF_steps_ahead_arma_3_1_6.ac1_4	MF_steps_ahead_arma_3_1_6_ac1_4	model,prediction	7085	1014	0.993858	0.000122046	0.993858
SB_MotifTwo_median.udu	SB_MotifTwo_median_udu	symbolic,motifs	3574	880	-0.99382	0.000122046	0.99382
CO_AddNoise_1_quantiles_10.fitexpb	CO_AddNoise_1_quantiles_10_fitexpb	correlation,AMI,entropy	1156	721	-0.993819	0.000122046	0.993819
SB_MotifTwo_mean.dd	SB_MotifTwo_mean_dd	symbolic,motifs	3534	879	0.993819	0.000122046	0.993819
CO_AddNoise_1_even_10.fitexprmse	CO_AddNoise_1_even_10_fitexprmse	correlation,AMI,entropy	1196	723	0.993816	0.000122046	0.993816
MF_steps_ahead_ar_best_6.ac1_5	MF_steps_ahead_ar_best_6_ac1_5	model,prediction,arfit	7042	1012	0.993815	0.000122046	0.993815
MF_AR_arcov_5.res_std	MF_AR_arcov_5_res_std	model,gof	3870	887	-0.993813	0.000122046	0.993813
ST_LocalExtrema_l50.medianabsext	ST_LocalExtrema_l50_medianabsext	distribution,stationarity	3326	866	-0.993812	0.000122046	0.993812
MF_AR_arcov_4.res_std	MF_AR_arcov_4_res_std	model,gof	3860	886	-0.99381	0.000122046	0.99381
CO_TranslateShape_circle_25_pts.fours	CO_TranslateShape_circle_25_pts_fours	correlation	1803	763	-0.99381	0.000122046	0.99381
SP_Summaries_welch_rect.area_2_1	SP_Summaries_welch_rect_area_2_1	spectral	4468	909	0.993807	0.000122046	0.993807
SP_Summaries_fft.area_2_1	SP_Summaries_fft_area_2_1	spectral	4592	910	0.993807	0.000122046	0.993807
SP_Summaries_fft.area_2_2	SP_Summaries_fft_area_2_2	spectral	4594	910	-0.993807	0.000122046	0.993807
SP_Summaries_welch_rect.area_2_2	SP_Summaries_welch_rect_area_2_2	spectral	4470	909	-0.993807	0.000122046	0.993807
ST_MomentCorr_002_02_median_iqr_abs.density	ST_MomentCorr_002_02_median_iqr_abs_density	statistics	7828	1059	0.993806	0.000122046	0.993806
SP_Summaries_pgram_hamm.logarea_3_3	SP_Summaries_pgram_hamm_logarea_3_3	spectral	4355	908	-0.993803	0.000122046	0.993803
EX_MovingThreshold_01_002.meanqover	EX_MovingThreshold_01_002_meanqover	outliers	3437	872	-0.993796	0.000122046	0.993796
AC_nl_011	AC_nl_011	correlation,nonlinearautocorr	158	162	0.993768	0.000122046	0.993768
SP_Summaries_fft.area_5_5	SP_Summaries_fft_area_5_5	spectral	4624	910	-0.993766	0.000122046	0.993766
SP_Summaries_welch_rect.area_5_5	SP_Summaries_welch_rect_area_5_5	spectral	4500	909	-0.993764	0.000122046	0.993764
SP_Summaries_fft.area_3_3	SP_Summaries_fft_area_3_3	spectral	4602	910	-0.99376	0.000122046	0.99376
SP_Summaries_welch_rect.area_3_3	SP_Summaries_welch_rect_area_3_3	spectral	4478	909	-0.99376	0.000122046	0.99376
SP_Summaries_fft.area_4_4	SP_Summaries_fft_area_4_4	spectral	4612	910	-0.993759	0.000122046	0.993759
SP_Summaries_welch_rect.area_4_4	SP_Summaries_welch_rect_area_4_4	spectral	4488	909	-0.993759	0.000122046	0.993759
SP_Summaries_pgram_hamm.logarea_4_4	SP_Summaries_pgram_hamm_logarea_4_4	spectral	4365	908	-0.993757	0.000122046	0.993757
CO_AddNoise_1_std1_10.fitexpb	CO_AddNoise_1_std1_10_fitexpb	correlation,AMI,entropy	1232	725	-0.993754	0.000122046	0.993754
MF_AR_arcov_3.res_std	MF_AR_arcov_3_res_std	model,gof	3851	885	-0.993749	0.000122046	0.993749
CO_Embed2_Dist_tau.d_max	CO_Embed2_Dist_tau_d_max	correlation,embedding	1958	769	-0.993748	0.000122046	0.993748
SP_Summaries_pgram_hamm.logarea_5_5	SP_Summaries_pgram_hamm_logarea_5_5	spectral	4377	908	-0.993732	0.000122046	0.993732
NL_TSTL_acp_1_001_025_10_05.ac1_acpf_8	NL_TSTL_acp_1_001_025_10_05_ac1_acpf_8	nonlinear,correlation	5174	925	0.99371	0.000122046	0.99371
MF_steps_ahead_ss_best_6.ac1_6	MF_steps_ahead_ss_best_6_ac1_6	model,prediction	7068	1013	0.993706	0.000122046	0.993706
SB_MotifThree_quantile.acbb	SB_MotifThree_quantile_acbb	symbolic,motifs	3655	881	-0.993702	0.000122046	0.993702
NL_TISEAN_fnn_mi_10_005.pfnn_4	NL_TISEAN_fnn_mi_10_005_pfnn_4	nonlinear,dimension,tisean	4842	916	-0.993688	0.000122046	0.993688
SB_MotifThree_quantile.cbca	SB_MotifThree_quantile_cbca	symbolic,motifs	3702	881	-0.993662	0.000122046	0.993662
FC_LocalSimple_mean4.swm	FC_LocalSimple_mean4_swm	forecasting	3022	836	0.993654	0.000122046	0.993654
SP_Summaries_fft.linfitsemilog_all_sea1	SP_Summaries_fft_linfitsemilog_all_sea1	spectral	4591	910	0.993653	0.000122046	0.993653
AC_nl_022	AC_nl_022	correlation,nonlinearautocorr	159	163	0.993652	0.000122046	0.993652
FC_Surprise_T1_50_3_q_500.lq	FC_Surprise_T1_50_3_q_500_lq	information,symbolic	2284	781	-0.993651	0.000122046	0.993651
SP_Summaries_welch_rect.linfitsemilog_all_sea1	SP_Summaries_welch_rect_linfitsemilog_all_sea1	spectral	4467	909	0.993642	0.000122046	0.993642
CO_AddNoise_1_even_10.ami_at_15	CO_AddNoise_1_even_10_ami_at_15	correlation,AMI,entropy	1191	723	0.993637	0.000122046	0.993637
AC_2	AC_2	correlation	94	93	0.993637	0.000122046	0.993637
FC_LocalSimple_median5.ac1	FC_LocalSimple_median5_ac1	forecasting	3075	840	0.993623	0.000122046	0.993623
NW_VisibilityGraph_norm.evparm1	NW_VisibilityGraph_norm_evparm1	network,visibilityGraph	2060	773	0.993593	0.000122046	0.993593
MF_GP_LocalPrediction_covSEiso_covNoise_10_3_20_randomgap.minerrbar	MF_GP_LocalPrediction_covSEiso_covNoise_10_3_20_randomgap_minerrbar	model,GaussianProcess	6565	987	-0.993588	0.000122046	0.993588
FC_LocalSimple_mean4.meanabserr	FC_LocalSimple_mean4_meanabserr	forecasting	3019	836	-0.993587	0.000122046	0.993587
MF_GP_hyperparameters_covSEiso_covPeriodic_covNoise_1_200_first.mlikelihood	MF_GP_hyperparameters_covSEiso_covPeriodic_covNoise_1_200_first_mlikelihood	model,GaussianProcess	6499	983	-0.993583	0.000122046	0.993583
SY_DynWin10.stdsampen2_015	SY_DynWin_stdsampen2_015	stationarity	2073	774	-0.99358	0.000122046	0.99358
PH_Walker_prop_11.w_propzcross	PH_Walker_prop_11_w_propzcross	trend	2586	814	-0.993577	0.000122046	0.993577
CP_ML_StepDetect_l1pwc_005.E	CP_ML_StepDetect_l1pwc_005_E	stepdetection	7780	1053	-0.993562	0.000122046	0.993562
MF_steps_ahead_ss_best_6.ac1_5	MF_steps_ahead_ss_best_6_ac1_5	model,prediction	7065	1013	0.993552	0.000122046	0.993552
MF_GP_hyperparameters_covSEiso_covNoise_1_200_first.mlikelihood	MF_GP_hyperparameters_covSEiso_covNoise_1_200_first_mlikelihood	model,GaussianProcess	6486	982	-0.993549	0.000122046	0.993549
PH_Walker_prop_09.w_std	PH_Walker_prop_09_w_std	trend	2560	813	0.993534	0.000122046	0.993534
MF_steps_ahead_ar_best_6.ac1_4	MF_steps_ahead_ar_best_6_ac1_4	model,prediction,arfit	7039	1012	0.993532	0.000122046	0.993532
SY_SpreadRandomLocal_200_100.meanac1	SY_SpreadRandomLocal_200_100_meanac1	stationarity	2148	480	0.993521	0.000122046	0.993521
SY_PPtest_0_5_ar_t1.maxstat	SY_PPtest_0_5_ar_t1_maxstat	unitroot	7702	1043	0.993491	0.000122046	0.993491
SP_Summaries_pgram_hamm.linfitloglog_mf_a1	SP_Summaries_pgram_hamm_linfitloglog_mf_a1	spectral	4334	908	-0.993483	0.000122046	0.993483
CO_AddNoise_1_gaussian.ami_at_15	CO_AddNoise_1_gaussian_ami_at_15	correlation,AMI,entropy	1266	727	0.993481	0.000122046	0.993481
PH_Walker_biasprop_05_01.res_ac1	PH_Walker_biasprop_05_01_res_ac1	trend	2617	815	0.99348	0.000122046	0.99348
SP_Summaries_fft.linfitloglog_mf_a1	SP_Summaries_fft_linfitloglog_mf_a1	spectral	4582	910	-0.993443	0.000122046	0.993443
SP_Summaries_welch_rect.linfitloglog_mf_a1	SP_Summaries_welch_rect_linfitloglog_mf_a1	spectral	4458	909	-0.993443	0.000122046	0.993443
SY_SpreadRandomLocal_100_100.meanac2	SY_SpreadRandomLocal_100_100_meanac2	stationarity	2133	479	0.993441	0.000122046	0.993441
SB_MotifTwo_mean.uud	SB_MotifTwo_mean_uud	symbolic,motifs	3543	879	-0.993425	0.000122046	0.993425
MF_steps_ahead_arma_3_1_6.ac1_3	MF_steps_ahead_arma_3_1_6_ac1_3	model,prediction	7082	1014	0.993411	0.000122046	0.993411
FC_LocalSimple_median5.ac2	FC_LocalSimple_median5_ac2	forecasting	3076	840	0.993398	0.000122046	0.993398
MF_FitSubsegments_arma_2_2_uniform_25_01.fpe_max	MF_FitSubsegments_arma_2_2_uniform_25_01_fpe_max	model,prediction	7139	1019	-0.993382	0.000122046	0.993382
MF_GP_LocalPrediction_covSEiso_covNoise_5_3_10_beforeafter.stdmlik	MF_GP_LocalPrediction_covSEiso_covNoise_5_3_10_beforeafter_stdmlik	model,GaussianProcess	6538	985	0.993373	0.000122046	0.993373
SP_Summaries_welch_rect.w_weighted_peak_height	SP_Summaries_welch_rect_w_weighted_peak_height	spectral	4399	909	-0.99336	0.000122046	0.99336
SP_Summaries_welch_rect.w_weighted_peak_prom	SP_Summaries_welch_rect_w_weighted_peak_prom	spectral	4398	909	-0.993358	0.000122046	0.993358
SP_Summaries_fft.w_weighted_peak_height	SP_Summaries_fft_w_weighted_peak_height	spectral	4523	910	-0.993358	0.000122046	0.993358
SP_Summaries_fft.w_weighted_peak_prom	SP_Summaries_fft_w_weighted_peak_prom	spectral	4522	910	-0.993357	0.000122046	0.993357
MF_steps_ahead_ar_best_6.meandiffrms	MF_steps_ahead_ar_best_6_meandiffrms	model,prediction,arfit	7047	1012	0.993348	0.000122046	0.993348
MF_steps_ahead_arma_3_1_6.meandiffrms	MF_steps_ahead_arma_3_1_6_meandiffrms	model,prediction	7093	1014	0.993348	0.000122046	0.993348
SP_Summaries_pgram_hamm.w_weighted_peak_height	SP_Summaries_pgram_hamm_w_weighted_peak_height	spectral	4275	908	-0.99334	0.000122046	0.99334
SP_Summaries_pgram_hamm.w_weighted_peak_prom	SP_Summaries_pgram_hamm_w_weighted_peak_prom	spectral	4274	908	-0.993331	0.000122046	0.993331
SP_Summaries_pgram_hamm.linfitloglog_hf_a1	SP_Summaries_pgram_hamm_linfitloglog_hf_a1	spectral	4329	908	-0.993321	0.000122046	0.993321
CO_Embed2_Dist_tau.d_expfit_meandiff	CO_Embed2_Dist_tau_d_expfit_meandiff	correlation,embedding	1965	769	0.993307	0.000122046	0.993307
SP_Summaries_pgram_hamm.linfitsemilog_all_sigma	SP_Summaries_pgram_hamm_linfitsemilog_all_sigma	spectral	4342	908	0.993298	0.000122046	0.993298
SP_Summaries_pgram_hamm.linfitsemilog_all_sea1	SP_Summaries_pgram_hamm_linfitsemilog_all_sea1	spectral	4343	908	0.993298	0.000122046	0.993298
CO_glscf_2_5_3	CO_glscf_2_5_3	correlation,glscf	523	250	0.993294	0.000122046	0.993294
EN_SampEn_5_02_diff1.sampen3	EN_SampEn_5_02_diff1_sampen3	entropy,sampen,controlen	2743	826	-0.993293	0.000122046	0.993293
NW_VisibilityGraph_norm.propmode	NW_VisibilityGraph_norm_propmode	network,visibilityGraph	2032	773	-0.99328	0.000122046	0.99328
MF_CompareTestSets_y_ar_best_uniform_25_01_1.stdrats_mean	MF_CompareTestSets_y_ar_best_uniform_25_01_1_stdrats_mean	model,prediction,arfit,stationarity	7194	1021	0.993265	0.000122046	0.993265
MF_AR_arcov_2.res_std	MF_AR_arcov_2_res_std	model,gof	3843	884	-0.993265	0.000122046	0.993265
SC_FluctAnal_mag_2_dfa_50_2_logi.ratsplitminerr	SC_FluctAnal_mag_2_dfa_50_2_logi_ratsplitminerr	scaling	4205	905	-0.993258	0.000122046	0.993258
MF_steps_ahead_ss_best_6.ac1_4	MF_steps_ahead_ss_best_6_ac1_4	model,prediction	7062	1013	0.993235	0.000122046	0.993235
SY_LocalDistributions_5_each.mindiv	SY_LocalDistributions_5_each_mindiv	stationarity	2213	493	0.993235	0.000122046	0.993235
EX_MovingThreshold_01_01.minq	EX_MovingThreshold_01_01_minq	outliers	3424	871	-0.993233	0.000122046	0.993233
AC_nl_015	AC_nl_015	correlation,nonlinearautocorr	176	180	0.993225	0.000122046	0.993225
EN_CID.CE1_norm	EN_CID_CE1_norm	entropy	872	514	-0.993224	0.000122046	0.993224
SB_MotifTwo_mean.duu	SB_MotifTwo_mean_duu	symbolic,motifs	3540	879	-0.993217	0.000122046	0.993217
MF_CompareTestSets_y_ss_2_uniform_25_01_1.stdrats_mean	MF_CompareTestSets_y_ss_2_uniform_25_01_1_stdrats_mean	model,prediction,stationarity	7234	1023	0.993213	0.000122046	0.993213
MF_CompareAR_1_10_all.maxv	MF_CompareAR_1_10_all_maxv	model	7362	1028	-0.993166	0.000122046	0.993166
SB_MotifThree_quantile.acb	SB_MotifThree_quantile_acb	symbolic,motifs	3612	881	-0.993149	0.000122046	0.993149
MF_GP_LocalPrediction_covSEiso_covNoise_10_3_20_frombefore.minerrbar	MF_GP_LocalPrediction_covSEiso_covNoise_10_3_20_frombefore_minerrbar	model,GaussianProcess	6547	986	-0.993145	0.000122046	0.993145
CO_AddNoise_1_even_10.ami_at_10	CO_AddNoise_1_even_10_ami_at_10	correlation,AMI,entropy	1190	723	0.993142	0.000122046	0.993142
NL_TSTL_LargestLyap_n1_01_001_3_1_4.p3	NL_TSTL_LargestLyap_n1_01_001_3_1_4_p3	nonlinear,tstool	5715	945	-0.993137	0.000122046	0.993137
MF_FitSubsegments_ar_2_uniform_25_01.fpe_max	MF_FitSubsegments_ar_2_uniform_25_01_fpe_max	model,prediction	7121	1017	-0.993134	0.000122046	0.993134
NW_VisibilityGraph_horiz.rangek	NW_VisibilityGraph_horiz_rangek	network,visibilityGraph	2001	772	-0.993131	0.000122046	0.993131
SP_Summaries_fft_logdev.logarea_4_1	SP_Summaries_fft_logdev_logarea_4_1	spectral	4731	911	0.993117	0.000122046	0.993117
SB_BinaryStats_mean.stdstretch0	SB_BinaryStats_mean_stdstretch0	distribution,stationarity	3483	876	0.993097	0.000122046	0.993097
NL_TSTL_LargestLyap_n1_01_001_3_1_4.ve_gradient	NL_TSTL_LargestLyap_n1_01_001_3_1_4_ve_gradient	nonlinear,tstool	5735	945	-0.993094	0.000122046	0.993094
MF_CompareTestSets_y_ss_2_uniform_25_01_1.stdrats_median	MF_CompareTestSets_y_ss_2_uniform_25_01_1_stdrats_median	model,prediction,stationarity	7235	1023	0.993094	0.000122046	0.993094
ST_SimpleStats_zcross	ST_SimpleStats_zcross	noisiness	88	87	-0.993089	0.000122046	0.993089
FC_Surprise_T1_100_4_q_500.lq	FC_Surprise_T1_100_4_q_500_lq	information,symbolic	2292	782	-0.993082	0.000122046	0.993082
MF_CompareTestSets_y_ar_best_uniform_25_01_1.stdrats_median	MF_CompareTestSets_y_ar_best_uniform_25_01_1_stdrats_median	model,prediction,arfit,stationarity	7195	1021	0.99308	0.000122046	0.99308
CO_AddNoise_1_quantiles_10.ami_at_15	CO_AddNoise_1_quantiles_10_ami_at_15	correlation,AMI,entropy	1153	721	0.993043	0.000122046	0.993043
MF_CompareTestSets_y_ar_4_rand_25_01_1.mabserr_mean	MF_CompareTestSets_y_ar_4_rand_25_01_1_mabserr_mean	model,prediction,stationarity	7162	1020	-0.993033	0.000122046	0.993033
MF_steps_ahead_ar_best_6.ac1_3	MF_steps_ahead_ar_best_6_ac1_3	model,prediction,arfit	7036	1012	0.993009	0.000122046	0.993009
SB_MotifThree_quantile.ccab	SB_MotifThree_quantile_ccab	symbolic,motifs	3706	881	-0.993004	0.000122046	0.993004
SB_MotifThree_quantile.bacb	SB_MotifThree_quantile_bacb	symbolic,motifs	3667	881	-0.993	0.000122046	0.993
CO_AddNoise_1_even_10.ami_at_20	CO_AddNoise_1_even_10_ami_at_20	correlation,AMI,entropy	1192	723	0.992997	0.000122046	0.992997
MF_CompareTestSets_y_ar_4_rand_25_01_1.rmserr_mean	MF_CompareTestSets_y_ar_4_rand_25_01_1_rmserr_mean	model,prediction,stationarity	7158	1020	-0.992995	0.000122046	0.992995
NL_TISEAN_fnn_mi_10_005.pfnn_7	NL_TISEAN_fnn_mi_10_005_pfnn_7	nonlinear,dimension,tisean	4845	916	-0.992982	0.000122046	0.992982
SB_MotifThree_quantile.accb	SB_MotifThree_quantile_accb	symbolic,motifs	3658	881	-0.992976	0.000122046	0.992976
SB_MotifThree_quantile.bca	SB_MotifThree_quantile_bca	symbolic,motifs	3620	881	-0.992942	0.000122046	0.992942
MF_CompareTestSets_y_ss_best_uniform_25_01_1.rmserr_median	MF_CompareTestSets_y_ss_best_uniform_25_01_1_rmserr_median	model,prediction,stationarity	7199	1022	-0.992925	0.000122046	0.992925
SY_SpreadRandomLocal_200_100.meanac2	SY_SpreadRandomLocal_200_100_meanac2	stationarity	2149	480	0.992923	0.000122046	0.992923
NW_VisibilityGraph_horiz.maxk	NW_VisibilityGraph_horiz_maxk	network,visibilityGraph	1999	772	-0.992912	0.000122046	0.992912
SB_MotifThree_quantile.bcab	SB_MotifThree_quantile_bcab	symbolic,motifs	3679	881	-0.992912	0.000122046	0.992912
SP_Summaries_fft_logdev.linfitloglog_all_a2	SP_Summaries_fft_logdev_linfitloglog_all_a2	spectral	4692	911	-0.992909	0.000122046	0.992909
NL_TSTL_acp_mi_1__10.ac1_acpf_1	NL_TSTL_acp_mi_1__10_ac1_acpf_1	nonlinear,correlation	5094	924	0.992907	0.000122046	0.992907
DN_RemovePoints_absfar_08.ac3diff	DN_RemovePoints_absfar_08_ac3diff	correlation,outliers	1724	756	0.992903	0.000122046	0.992903
SB_MotifThree_quantile.abac	SB_MotifThree_quantile_abac	symbolic,motifs	3644	881	-0.992899	0.000122046	0.992899
SB_TransitionpAlphabet_40_1.stdeigfexp_b	SB_TransitionpAlphabet_40_1_stdeigfexp_b	symbolic,transitionmat	1469	739	0.992864	0.000122046	0.992864
FC_Surprise_T1_10_1_m2quad_500.mean	FC_Surprise_T1_10_1_m2quad_500_mean	information,symbolic	2473	805	-0.992828	0.000122046	0.992828
SB_MotifThree_quantile.bcca	SB_MotifThree_quantile_bcca	symbolic,motifs	3684	881	-0.992816	0.000122046	0.992816
SB_MotifTwo_median.uuu	SB_MotifTwo_median_uuu	symbolic,motifs	3576	880	0.992813	0.000122046	0.992813
SB_MotifTwo_median.ud	SB_MotifTwo_median_ud	symbolic,motifs	3566	880	-0.992811	0.000122046	0.992811
SB_MotifTwo_median.uu	SB_MotifTwo_median_uu	symbolic,motifs	3567	880	0.992809	0.000122046	0.992809
CO_AddNoise_1_kraskov1_4.ami_at_10	CO_AddNoise_1_kraskov1_4_ami_at_10	correlation,AMI,entropy	1303	729	0.992781	0.000122046	0.992781
SB_TransitionMatrix_21.stdeig	SB_TransitionMatrix_21_stdeig	symbolic,transitionmat	1337	731	-0.992764	0.000122046	0.992764
SB_TransitionMatrix_21.mineig	SB_TransitionMatrix_21_mineig	symbolic,transitionmat	1339	731	0.992764	0.000122046	0.992764
SB_TransitionMatrix_21.ondiag	SB_TransitionMatrix_21_ondiag	symbolic,transitionmat	1333	731	0.992764	0.000122046	0.992764
MF_CompareTestSets_y_ar_4_rand_25_01_1.mabserr_median	MF_CompareTestSets_y_ar_4_rand_25_01_1_mabserr_median	model,prediction,stationarity	7163	1020	-0.99276	0.000122046	0.99276
CO_AddNoise_1_quantiles_10.ami_at_20	CO_AddNoise_1_quantiles_10_ami_at_20	correlation,AMI,entropy	1154	721	0.992755	0.000122046	0.992755
MF_CompareTestSets_y_ar_4_rand_25_01_1.rmserr_median	MF_CompareTestSets_y_ar_4_rand_25_01_1_rmserr_median	model,prediction,stationarity	7159	1020	-0.992732	0.000122046	0.992732
SB_MotifTwo_median.uuuu	SB_MotifTwo_median_uuuu	symbolic,motifs	3593	880	0.99273	0.000122046	0.99273
SB_MotifTwo_median.dd	SB_MotifTwo_median_dd	symbolic,motifs	3564	880	0.992719	0.000122046	0.992719
SB_MotifTwo_median.du	SB_MotifTwo_median_du	symbolic,motifs	3565	880	-0.992716	0.000122046	0.992716
MS_shannon_2_1t10.stdent	MS_shannon_2_1t10_stdent	entropy,mex	6928	688	0.992712	0.000122046	0.992712
CO_AddNoise_1_quantiles_10.fitexprmse	CO_AddNoise_1_quantiles_10_fitexprmse	correlation,AMI,entropy	1158	721	0.992704	0.000122046	0.992704
PH_Walker_biasprop_01_05.w_median	PH_Walker_biasprop_01_05_w_median	trend	2619	816	-0.992702	0.000122046	0.992702
FC_Surprise_dist_5_1_m2quad_500.tstat	FC_Surprise_dist_5_1_m2quad_500_tstat	information,symbolic	2447	801	0.992691	0.000122046	0.992691
MF_CompareTestSets_y_ss_best_uniform_25_01_1.rmserr_mean	MF_CompareTestSets_y_ss_best_uniform_25_01_1_rmserr_mean	model,prediction,stationarity	7198	1022	-0.992691	0.000122046	0.992691
AC_nl_033	AC_nl_033	correlation,nonlinearautocorr	160	164	0.992659	0.000122046	0.992659
MF_steps_ahead_ar_2_6.meandiffrms	MF_steps_ahead_ar_2_6_meandiffrms	model,prediction	7024	1011	0.992642	0.000122046	0.992642
MF_CompareTestSets_y_ss_best_uniform_25_01_1.mabserr_median	MF_CompareTestSets_y_ss_best_uniform_25_01_1_mabserr_median	model,prediction,stationarity	7203	1022	-0.992641	0.000122046	0.992641
MD_hrv_classic.SD2	MD_hrv_classic_SD2	medical	7764	1051	0.992641	0.000122046	0.992641
SC_FluctAnal_2_rsrange_50_logi.meanssr	SC_FluctAnal_2_rsrange_50_logi_meanssr	scaling	4014	897	0.992639	0.000122046	0.992639
CO_AddNoise_1_gaussian.ami_at_10	CO_AddNoise_1_gaussian_ami_at_10	correlation,AMI,entropy	1265	727	0.992626	0.000122046	0.992626
CO_AddNoise_1_quantiles_10.firstUnder75	CO_AddNoise_1_quantiles_10_firstUnder75	correlation,AMI,entropy	1148	721	-0.992587	0.000122046	0.992587
EN_rpde_3_1.H_norm	EN_rpde_3_1_H_norm	entropy	859	511	0.992578	0.000122046	0.992578
EN_rpde_3_1.H	EN_rpde_3_1_H	entropy	858	511	0.992578	0.000122046	0.992578
CO_CompareMinAMI_std2_2_80.mean	CO_CompareMinAMI_std2_2_80_mean	correlation,AMI	484	720	0.992575	0.000122046	0.992575
SB_MotifThree_quantile.caba	SB_MotifThree_quantile_caba	symbolic,motifs	3690	881	-0.992561	0.000122046	0.992561
SB_MotifThree_quantile.bacc	SB_MotifThree_quantile_bacc	symbolic,motifs	3668	881	-0.992556	0.000122046	0.992556
FC_Surprise_T2_100_5_q_500.tstat	FC_Surprise_T2_100_5_q_500_tstat	information,symbolic	2335	787	-0.992549	0.000122046	0.992549
NL_embed_PCA_1_10.perc_4	NL_embed_PCA_1_10_perc_4	embedding,pca	6960	1008	-0.992547	0.000122046	0.992547
SB_BinaryStats_iqr.longstretch0	SB_BinaryStats_iqr_longstretch0	distribution,stationarity	3490	877	0.992544	0.000122046	0.992544
SP_Summaries_fft.fpoly2_sse	SP_Summaries_fft_fpoly2_sse	spectral	4555	910	0.992516	0.000122046	0.992516
SP_Summaries_welch_rect.fpoly2_sse	SP_Summaries_welch_rect_fpoly2_sse	spectral	4431	909	0.992516	0.000122046	0.992516
EN_Randomize_statdist.ac3fexpa	EN_Randomize_statdist_ac3fexpa	entropy,slow	2830	830	0.992514	0.000122046	0.992514
NL_TISEAN_fnn_mi_10_005.meanpfnn	NL_TISEAN_fnn_mi_10_005_meanpfnn	nonlinear,dimension,tisean	4859	916	-0.992509	0.000122046	0.992509
EX_MovingThreshold_1_01.minq	EX_MovingThreshold_1_01_minq	outliers	3446	873	-0.992466	0.000122046	0.992466
MF_CompareTestSets_y_ss_best_uniform_25_01_1.mabserr_mean	MF_CompareTestSets_y_ss_best_uniform_25_01_1_mabserr_mean	model,prediction,stationarity	7202	1022	-0.992464	0.000122046	0.992464
MF_steps_ahead_ss_best_6.ac1_3	MF_steps_ahead_ss_best_6_ac1_3	model,prediction	7059	1013	0.992463	0.000122046	0.992463
PH_Walker_prop_09.w_ac1	PH_Walker_prop_09_w_ac1	trend	2561	813	0.992391	0.000122046	0.992391
ST_LocalExtrema_n50.stdext	ST_LocalExtrema_n50_stdext	distribution,stationarity	3389	869	-0.992387	0.000122046	0.992387
CO_glscf_1_10_3	CO_glscf_1_10_3	correlation,glscf	511	238	0.992366	0.000122046	0.992366
SP_Summaries_fft.wmax_75	SP_Summaries_fft_wmax_75	spectral	4546	910	-0.992353	0.000122046	0.992353
EN_Randomize_dyndist.ac3fexpa	EN_Randomize_dyndist_ac3fexpa	entropy,slow	2893	831	0.992352	0.000122046	0.992352
MF_steps_ahead_ss_best_6.meandiffrms	MF_steps_ahead_ss_best_6_meandiffrms	model,prediction	7070	1013	0.992352	0.000122046	0.992352
SP_Summaries_pgram_hamm.wmax_75	SP_Summaries_pgram_hamm_wmax_75	spectral	4298	908	-0.992351	0.000122046	0.992351
SP_Summaries_welch_rect.wmax_75	SP_Summaries_welch_rect_wmax_75	spectral	4422	909	-0.99235	0.000122046	0.99235
PH_Walker_prop_09.w_propzcross	PH_Walker_prop_09_w_propzcross	trend	2566	813	-0.992348	0.000122046	0.992348
EN_SampEn_5_03.sampen3	EN_SampEn_5_03_sampen3	entropy,sampen	2729	824	-0.992339	0.000122046	0.992339
AC_nl_036	AC_nl_036	correlation,nonlinearautocorr	182	186	0.992338	0.000122046	0.992338
MF_steps_ahead_ar_best_6.ac1_2	MF_steps_ahead_ar_best_6_ac1_2	model,prediction,arfit	7033	1012	0.992335	0.000122046	0.992335
SP_Summaries_pgram_hamm.area_5_1	SP_Summaries_pgram_hamm_area_5_1	spectral	4368	908	0.992333	0.000122046	0.992333
NL_embed_PCA_1_10.std	NL_embed_PCA_1_10_std	embedding,pca	6962	1008	0.992332	0.000122046	0.992332
NW_VisibilityGraph_horiz.stdk	NW_VisibilityGraph_horiz_stdk	network,visibilityGraph	1998	772	-0.992319	0.000122046	0.992319
FC_LocalSimple_mean4.stderr	FC_LocalSimple_mean4_stderr	forecasting	3020	836	-0.992314	0.000122046	0.992314
CO_Embed2_Dist_tau.d_min	CO_Embed2_Dist_tau_d_min	correlation,embedding	1960	769	-0.992308	0.000122046	0.992308
SP_Summaries_pgram_hamm.area_4_1	SP_Summaries_pgram_hamm_area_4_1	spectral	4358	908	0.992299	0.000122046	0.992299
FC_Surprise_T1_100_5_q_500.mean	FC_Surprise_T1_100_5_q_500_mean	information,symbolic	2298	783	-0.992284	0.000122046	0.992284
SB_MotifTwo_median.uud	SB_MotifTwo_median_uud	symbolic,motifs	3575	880	-0.992271	0.000122046	0.992271
NL_TISEAN_fnn_mi_10_005.pfnn_3	NL_TISEAN_fnn_mi_10_005_pfnn_3	nonlinear,dimension,tisean	4841	916	-0.99227	0.000122046	0.99227
NL_TSTL_acp_1_001_025_10_05.ac1_acpf_9	NL_TSTL_acp_1_001_025_10_05_ac1_acpf_9	nonlinear,correlation	5178	925	0.992265	0.000122046	0.992265
NL_TISEAN_fnn_1_10_005.meanpfnn	NL_TISEAN_fnn_1_10_005_meanpfnn	nonlinear,dimension,tisean	4885	917	-0.992248	0.000122046	0.992248
SB_MotifThree_quantile.bac	SB_MotifThree_quantile_bac	symbolic,motifs	3616	881	-0.992224	0.000122046	0.992224
SB_MotifThree_quantile.cabb	SB_MotifThree_quantile_cabb	symbolic,motifs	3691	881	-0.992179	0.000122046	0.992179
CO_TranslateShape_circle_35_pts.sixes	CO_TranslateShape_circle_35_pts_sixes	correlation	1821	764	-0.992172	0.000122046	0.992172
PH_Walker_prop_09.sw_distdiff	PH_Walker_prop_09_sw_distdiff	trend	2574	813	-0.992148	0.000122046	0.992148
ApEn2_01	ApEn2_01	entropy	914	555	0.992146	0.000122046	0.992146
MF_GP_LocalPrediction_covSEiso_covNoise_10_3_20_randomgap.meanlogh1	MF_GP_LocalPrediction_covSEiso_covNoise_10_3_20_randomgap_meanlogh1	model,GaussianProcess	6566	987	0.992126	0.000122046	0.992126
FC_LocalSimple_meantau.ac2	FC_LocalSimple_meantau_ac2	forecasting	3035	837	0.992122	0.000122046	0.992122
NW_VisibilityGraph_norm.meank	NW_VisibilityGraph_norm_meank	network,visibilityGraph	2033	773	0.99211	0.000122046	0.99211
CO_AddNoise_1_kraskov1_4.pdec	CO_AddNoise_1_kraskov1_4_pdec	correlation,AMI,entropy	1295	729	0.992076	0.000122046	0.992076
TSTL_localdensity_5_40_1_3.medianden	TSTL_localdensity_5_40_1_3_medianden	nonlinear,tstool	5534	940	-0.992055	0.000122046	0.992055
SB_MotifTwo_median.duu	SB_MotifTwo_median_duu	symbolic,motifs	3572	880	-0.99205	0.000122046	0.99205
SB_MotifThree_quantile.cab	SB_MotifThree_quantile_cab	symbolic,motifs	3624	881	-0.99205	0.000122046	0.99205
PH_Walker_biasprop_01_05.res_ac1	PH_Walker_biasprop_01_05_res_ac1	trend	2637	816	0.99204	0.000122046	0.99204
SB_MotifTwo_median.dud	SB_MotifTwo_median_dud	symbolic,motifs	3571	880	-0.992019	0.000122046	0.992019
EN_Randomize_permute.ac3fexpa	EN_Randomize_permute_ac3fexpa	entropy,slow	2956	832	0.992011	0.000122046	0.992011
CO_TranslateShape_circle_25_pts.mean	CO_TranslateShape_circle_25_pts_mean	correlation	1797	763	0.992001	0.000122046	0.992001
CO_AddNoise_1_quantiles_10.ami_at_10	CO_AddNoise_1_quantiles_10_ami_at_10	correlation,AMI,entropy	1152	721	0.99197	0.000122046	0.99197
MF_GP_LocalPrediction_covSEiso_covNoise_5_3_10_beforeafter.maxmlik	MF_GP_LocalPrediction_covSEiso_covNoise_5_3_10_beforeafter_maxmlik	model,GaussianProcess	6536	985	0.99196	0.000122046	0.99196
SB_TransitionpAlphabet_40_1.maxdiagfexp_b	SB_TransitionpAlphabet_40_1_maxdiagfexp_b	symbolic,transitionmat	1452	739	0.991956	0.000122046	0.991956
PP_ModelFit_ar_2.rmserrrat_p2_40	PP_ModelFit_ar_2_rmserrrat_p2_40	preprocessing,trend	7003	1010	0.991948	0.000122046	0.991948
SB_MotifTwo_median.ddd	SB_MotifTwo_median_ddd	symbolic,motifs	3569	880	0.991947	0.000122046	0.991947
SB_MotifThree_quantile.abcb	SB_MotifThree_quantile_abcb	symbolic,motifs	3649	881	-0.991927	0.000122046	0.991927
CO_TranslateShape_circle_15_pts.ones	CO_TranslateShape_circle_15_pts_ones	correlation	1786	762	-0.991913	0.000122046	0.991913
PH_Walker_prop_09.w_ac2	PH_Walker_prop_09_w_ac2	trend	2562	813	0.99189	0.000122046	0.99189
SP_Summaries_fft_logdev.logarea_3_1	SP_Summaries_fft_logdev_logarea_3_1	spectral	4723	911	0.991858	0.000122046	0.991858
SY_SlidingWindow_s_sampen10_2	SY_SlidingWindow_s_sampen10_2	stationarity	593	320	0.991855	0.000122046	0.991855
SY_LocalDistributions_4_each.mindiv	SY_LocalDistributions_4_each_mindiv	stationarity	2209	492	0.991845	0.000122046	0.991845
SP_Summaries_pgram_hamm.peakPower_prom2	SP_Summaries_pgram_hamm_peakPower_prom2	spectral	4273	908	0.991841	0.000122046	0.991841
FC_Surprise_dist_5_1_m2quad_500.mean	FC_Surprise_dist_5_1_m2quad_500_mean	information,symbolic	2442	801	-0.991807	0.000122046	0.991807
FC_LocalSimple_mean4.ac1	FC_LocalSimple_mean4_ac1	forecasting	3024	836	0.991797	0.000122046	0.991797
WL_dwtcoeff_db3_5.maxd_l2	WL_dwtcoeff_db3_5_maxd_l2	wavelet,dwt	6723	1000	-0.991796	0.000122046	0.991796
FC_Surprise_T1_100_5_q_500.min	FC_Surprise_T1_100_5_q_500_min	information,symbolic	2296	783	-0.99178	0.000122046	0.99178
CO_CompareMinAMI_quantiles_2_80.mean	CO_CompareMinAMI_quantiles_2_80_mean	correlation,AMI	462	718	0.991763	0.000122046	0.991763
MF_GP_LocalPrediction_covSEiso_covNoise_5_3_10_beforeafter.meanlogh1	MF_GP_LocalPrediction_covSEiso_covNoise_5_3_10_beforeafter_meanlogh1	model,GaussianProcess	6530	985	0.991742	0.000122046	0.991742
SY_TISEAN_nstat_z_4_1_3.trace	SY_TISEAN_nstat_z_4_1_3_trace	nonlinear,tisean,model,stationarity	4901	918	-0.991661	0.000122046	0.991661
SB_MotifThree_quantile.bbac	SB_MotifThree_quantile_bbac	symbolic,motifs	3671	881	-0.991652	0.000122046	0.991652
SP_Summaries_pgram_hamm.area_3_1	SP_Summaries_pgram_hamm_area_3_1	spectral	4350	908	0.991642	0.000122046	0.991642
CO_Embed2_Basic_1.updiag05	CO_Embed2_Basic_1_updiag05	correlation	1527	742	0.991626	0.000122046	0.991626
EN_SampEn_5_03.sampen2	EN_SampEn_5_03_sampen2	entropy,sampen	2728	824	-0.991604	0.000122046	0.991604
EN_rpde_3_1.maxRPD	EN_rpde_3_1_maxRPD	entropy	862	511	-0.991602	0.000122046	0.991602
NL_MS_nlpe_2_mi.meanabs	NL_MS_nlpe_2_mi_meanabs	nonlinear,prediction,model	6830	1004	-0.991559	0.000122046	0.991559
NL_MS_nlpe_2_mi.mms	NL_MS_nlpe_2_mi_mms	nonlinear,prediction,model	6832	1004	-0.99153	0.000122046	0.99153
WL_dwtcoeff_db3_5.mind_l2	WL_dwtcoeff_db3_5_mind_l2	wavelet,dwt	6724	1000	0.991526	0.000122046	0.991526
FC_Surprise_dist_5_tau_m2quad_500.mean	FC_Surprise_dist_5_tau_m2quad_500_mean	information,symbolic	2450	802	-0.991521	0.000122046	0.991521
SB_MotifTwo_median.dddd	SB_MotifTwo_median_dddd	symbolic,motifs	3578	880	0.99151	0.000122046	0.99151
AC_nl_1357	AC_nl_1357	correlation,nonlinearautocorr	147	151	0.991488	0.000122046	0.991488
NL_MS_nlpe_2_mi.stde	NL_MS_nlpe_2_mi_stde	nonlinear,prediction,model	6831	1004	-0.991469	0.000122046	0.991469
NL_MS_nlpe_3_ac.meanabs	NL_MS_nlpe_3_ac_meanabs	nonlinear,prediction,model	6857	1005	-0.991464	0.000122046	0.991464
CO_trev_1.absnum	CO_trev_1_absnum	correlation,nonlinear	1122	708	-0.991435	0.000122046	0.991435
NL_MS_nlpe_3_ac.mms	NL_MS_nlpe_3_ac_mms	nonlinear,prediction,model	6859	1005	-0.991393	0.000122046	0.991393
SY_TISEAN_nstat_z_5_1_3.trace	SY_TISEAN_nstat_z_5_1_3_trace	nonlinear,tisean,model,stationarity	4928	919	-0.991392	0.000122046	0.991392
NL_MS_nlpe_3_ac.stde	NL_MS_nlpe_3_ac_stde	nonlinear,prediction,model	6858	1005	-0.991379	0.000122046	0.991379
AC_nl_2468	AC_nl_2468	correlation,nonlinearautocorr	148	152	0.991366	0.000122046	0.991366
SP_Summaries_fft_logdev.linfitsemilog_all_a1	SP_Summaries_fft_logdev_linfitsemilog_all_a1	spectral	4711	911	0.991347	0.000122046	0.991347
NL_TSTL_acp_1_001_025_10_05.sacpf_10	NL_TSTL_acp_1_001_025_10_05_sacpf_10	nonlinear,correlation	5180	925	0.991343	0.000122046	0.991343
CO_AddNoise_1_std1_10.ami_at_15	CO_AddNoise_1_std1_10_ami_at_15	correlation,AMI,entropy	1229	725	0.991335	0.000122046	0.991335
PH_Walker_prop_05.w_std	PH_Walker_prop_05_w_std	trend	2540	812	0.991327	0.000122046	0.991327
PH_Walker_biasprop_05_01.sw_distdiff	PH_Walker_biasprop_05_01_sw_distdiff	trend	2614	815	-0.991311	0.000122046	0.991311
EN_SampEn_5_02.sampen2	EN_SampEn_5_02_sampen2	entropy,sampen	2721	823	-0.991297	0.000122046	0.991297
TSTL_localdensity_5_40_1_3.ac3den	TSTL_localdensity_5_40_1_3_ac3den	nonlinear,tstool	5537	940	0.991294	0.000122046	0.991294
MF_GP_LocalPrediction_covSEiso_covNoise_10_3_20_frombefore.meanlogh1	MF_GP_LocalPrediction_covSEiso_covNoise_10_3_20_frombefore_meanlogh1	model,GaussianProcess	6548	986	0.99129	0.000122046	0.99129
NW_VisibilityGraph_horiz.gaussnlogL	NW_VisibilityGraph_horiz_gaussnlogL	network,visibilityGraph,lengthdep	2021	772	-0.991289	0.000122046	0.991289
SP_Summaries_welch_rect.linfitloglog_lf_a1	SP_Summaries_welch_rect_linfitloglog_lf_a1	spectral	4448	909	-0.991286	0.000122046	0.991286
SP_Summaries_fft.linfitloglog_lf_a1	SP_Summaries_fft_linfitloglog_lf_a1	spectral	4572	910	-0.991286	0.000122046	0.991286
NL_embed_PCA_1_10.nto80	NL_embed_PCA_1_10_nto80	embedding,pca	6969	1008	-0.991286	0.000122046	0.991286
SY_SpreadRandomLocal_ac5_100.meanac1	SY_SpreadRandomLocal_ac5_100_meanac1	stationarity	2100	477	0.991234	0.000122046	0.991234
SP_Summaries_pgram_hamm.linfitloglog_lf_a1	SP_Summaries_pgram_hamm_linfitloglog_lf_a1	spectral	4324	908	-0.991233	0.000122046	0.991233
SB_MotifThree_quantile.aa	SB_MotifThree_quantile_aa	symbolic,motifs	3595	881	0.991231	0.000122046	0.991231
MF_steps_ahead_arma_3_1_6.maxdiffrms	MF_steps_ahead_arma_3_1_6_maxdiffrms	model,prediction	7094	1014	0.99123	0.000122046	0.99123
CO_tc3_3.denom	CO_tc3_3_denom	correlation,nonlinear	1108	705	0.991216	0.000122046	0.991216
SY_SlidingWindow_s_sampen5_10	SY_SlidingWindow_s_sampen5_10	stationarity	591	318	0.991183	0.000122046	0.991183
AC_nl_44	AC_nl_44	correlation,nonlinearautocorr	155	159	0.99118	0.000122046	0.99118
CO_AddNoise_1_kraskov1_4.ami_at_15	CO_AddNoise_1_kraskov1_4_ami_at_15	correlation,AMI,entropy	1304	729	0.991178	0.000122046	0.991178
CO_Embed2_Basic_1.incircle_1	CO_Embed2_Basic_1_incircle_1	correlation	1550	742	0.991178	0.000122046	0.991178
PP_ModelFit_ar_2.rmserrrat_p1_40	PP_ModelFit_ar_2_rmserrrat_p1_40	preprocessing,trend	6999	1010	0.991162	0.000122046	0.991162
MF_steps_ahead_ar_2_6.maxdiffrms	MF_steps_ahead_ar_2_6_maxdiffrms	model,prediction	7025	1011	0.99115	0.000122046	0.99115
FC_LocalSimple_median5.meanabserr	FC_LocalSimple_median5_meanabserr	forecasting	3070	840	-0.991139	0.000122046	0.991139
EN_SampEn_5_03.sampen4	EN_SampEn_5_03_sampen4	entropy,sampen	2730	824	-0.991121	0.000122046	0.991121
SP_Summaries_fft.std	SP_Summaries_fft_std	spectral	4531	910	0.991107	0.000122046	0.991107
SP_Summaries_welch_rect.std	SP_Summaries_welch_rect_std	spectral	4407	909	0.991107	0.000122046	0.991107
FC_LocalSimple_mean4.ac2	FC_LocalSimple_mean4_ac2	forecasting	3025	836	0.991105	0.000122046	0.991105
MF_steps_ahead_ar_best_6.maxdiffrms	MF_steps_ahead_ar_best_6_maxdiffrms	model,prediction,arfit	7048	1012	0.991101	0.000122046	0.991101
CO_AddNoise_1_kraskov1_4.ami_at_5	CO_AddNoise_1_kraskov1_4_ami_at_5	correlation,AMI,entropy	1302	729	0.991098	0.000122046	0.991098
MF_CompareAR_1_10_05.minv	MF_CompareAR_1_10_05_minv	model	7379	1029	-0.991071	0.000122046	0.991071
EN_SampEn_5_015.sampen2	EN_SampEn_5_015_sampen2	entropy,sampen	2714	822	-0.991056	0.000122046	0.991056
FC_Surprise_dist_5_tau_m2quad_500.tstat	FC_Surprise_dist_5_tau_m2quad_500_tstat	information,symbolic	2455	802	0.991055	0.000122046	0.991055
PH_Walker_momentum_5.res_ac1	PH_Walker_momentum_5_res_ac1	trend	2677	818	0.991045	0.000122046	0.991045
MF_GP_LocalPrediction_covSEiso_covNoise_10_3_20_randomgap.meanlogh2	MF_GP_LocalPrediction_covSEiso_covNoise_10_3_20_randomgap_meanlogh2	model,GaussianProcess	6568	987	0.991035	0.000122046	0.991035
SB_MotifTwo_mean.dud	SB_MotifTwo_mean_dud	symbolic,motifs	3539	879	-0.991034	0.000122046	0.991034
SB_MotifThree_quantile.caab	SB_MotifThree_quantile_caab	symbolic,motifs	3688	881	-0.991018	0.000122046	0.991018
SB_MotifTwo_mean.duud	SB_MotifTwo_mean_duud	symbolic,motifs	3552	879	-0.990993	0.000122046	0.990993
MF_GP_LocalPrediction_covSEiso_covNoise_5_3_10_beforeafter.meanlogh2	MF_GP_LocalPrediction_covSEiso_covNoise_5_3_10_beforeafter_meanlogh2	model,GaussianProcess	6532	985	0.990992	0.000122046	0.990992
PH_Walker_runningvar_15_50.w_ac1	PH_Walker_runningvar_15_50_w_ac1	trend	2681	819	0.990988	0.000122046	0.990988
CO_glscf_1_1_4	CO_glscf_1_1_4	correlation,glscf	494	221	0.990972	0.000122046	0.990972
MF_GP_hyperparameters_covSEiso_covNoise_1_200_first.logh3	MF_GP_hyperparameters_covSEiso_covNoise_1_200_first_logh3	model,GaussianProcess	6485	982	-0.990947	0.000122046	0.990947
PP_Iterate_diff.statav5_jump	PP_Iterate_diff_statav5_jump	preprocessing,raw,stationarity	6439	979	0.990932	0.000122046	0.990932
MF_CompareAR_1_10_05.medianv	MF_CompareAR_1_10_05_medianv	model	7381	1029	-0.990922	0.000122046	0.990922
ST_LocalExtrema_n25.meanabsext	ST_LocalExtrema_n25_meanabsext	distribution,stationarity	3369	868	-0.990914	0.000122046	0.990914
TSTL_localdensity_5_40_ac_2.ac2den	TSTL_localdensity_5_40_ac_2_ac2den	nonlinear,tstool	5522	939	0.990912	0.000122046	0.990912
NL_TISEAN_fnn_mi_10_005.pfnn_2	NL_TISEAN_fnn_mi_10_005_pfnn_2	nonlinear,dimension,tisean	4840	916	-0.990896	0.000122046	0.990896
MF_steps_ahead_ss_best_6.ac1_2	MF_steps_ahead_ss_best_6_ac1_2	model,prediction	7056	1013	0.990894	0.000122046	0.990894
MF_FitSubsegments_arsbc_uniform_25_01.sbcs_min	MF_FitSubsegments_arsbc_uniform_25_01_sbcs_min	model,prediction,arfit	7106	1015	-0.99089	0.000122046	0.99089
SP_Summaries_pgram_hamm.logarea_5_2	SP_Summaries_pgram_hamm_logarea_5_2	spectral	4371	908	-0.990886	0.000122046	0.990886
SB_MotifTwo_median.duud	SB_MotifTwo_median_duud	symbolic,motifs	3584	880	-0.990884	0.000122046	0.990884
EN_SampEn_5_02.sampen3	EN_SampEn_5_02_sampen3	entropy,sampen	2722	823	-0.990879	0.000122046	0.990879
PH_Walker_runningvar_15_50.w_propzcross	PH_Walker_runningvar_15_50_w_propzcross	trend	2686	819	-0.990876	0.000122046	0.990876
PH_Walker_momentum_2.w_std	PH_Walker_momentum_2_w_std	trend	2640	817	0.990871	0.000122046	0.990871
SP_Summaries_pgram_hamm.logstd	SP_Summaries_pgram_hamm_logstd	spectral	4285	908	0.990868	0.000122046	0.990868
SP_Summaries_pgram_hamm.sfm	SP_Summaries_pgram_hamm_sfm	spectral	4316	908	-0.99086	0.000122046	0.99086
MF_GP_LocalPrediction_covSEiso_covNoise_10_3_20_randomgap.stdmlik	MF_GP_LocalPrediction_covSEiso_covNoise_10_3_20_randomgap_stdmlik	model,GaussianProcess	6574	987	0.990849	0.000122046	0.990849
SB_MotifThree_quantile.baac	SB_MotifThree_quantile_baac	symbolic,motifs	3662	881	-0.990821	0.000122046	0.990821
SC_FluctAnal_2_rsrangefit_50_1_logi.ssr	SC_FluctAnal_2_rsrangefit_50_1_logi_ssr	scaling	4033	898	0.990818	0.000122046	0.990818
SP_Summaries_fft.logarea_5_2	SP_Summaries_fft_logarea_5_2	spectral	4619	910	-0.990809	0.000122046	0.990809
SP_Summaries_welch_rect.logarea_5_2	SP_Summaries_welch_rect_logarea_5_2	spectral	4495	909	-0.990809	0.000122046	0.990809
SP_Summaries_fft.fpoly2csS_p1	SP_Summaries_fft_fpoly2csS_p1	spectral	4552	910	-0.990797	0.000122046	0.990797
SP_Summaries_welch_rect.fpoly2csS_p1	SP_Summaries_welch_rect_fpoly2csS_p1	spectral	4428	909	-0.990797	0.000122046	0.990797
EX_MovingThreshold_1_01.iqrq	EX_MovingThreshold_1_01_iqrq	outliers	3444	873	-0.990796	0.000122046	0.990796
SB_MotifThree_quantile.aaa	SB_MotifThree_quantile_aaa	symbolic,motifs	3605	881	0.990783	0.000122046	0.990783
MF_arfit_1_8_sbc.sumsqA	MF_arfit_1_8_sbc_sumsqA	modelfit,arfit	6771	1002	0.990774	0.000122046	0.990774
NL_embed_PCA_1_10.range	NL_embed_PCA_1_10_range	embedding,pca	6963	1008	0.990766	0.000122046	0.990766
MF_steps_ahead_arma_3_1_6.ac1_2	MF_steps_ahead_arma_3_1_6_ac1_2	model,prediction	7079	1014	0.990755	0.000122046	0.990755
NL_TSTL_acp_1_001_025_10_05.sacpf_9	NL_TSTL_acp_1_001_025_10_05_sacpf_9	nonlinear,correlation	5176	925	0.990751	0.000122046	0.990751
MF_StateSpace_n4sid_2_05_1.m_aic	MF_StateSpace_n4sid_2_05_1_m_aic	model	7289	1026	-0.990746	0.000122046	0.990746
CO_glscf_1_2_4	CO_glscf_1_2_4	correlation,glscf	500	227	0.99074	0.000122046	0.99074
CO_AddNoise_1_even_10.ami_at_5	CO_AddNoise_1_even_10_ami_at_5	correlation,AMI,entropy	1189	723	0.990734	0.000122046	0.990734
SB_TransitionMatrix_41.TD1	SB_TransitionMatrix_41_TD1	symbolic,transitionmat	1350	733	0.990733	0.000122046	0.990733
PH_Walker_biasprop_05_01.sw_maxrat	PH_Walker_biasprop_05_01_sw_maxrat	trend	2611	815	0.990718	0.000122046	0.990718
CO_AddNoise_1_std1_10.fitexprmse	CO_AddNoise_1_std1_10_fitexprmse	correlation,AMI,entropy	1234	725	0.990716	0.000122046	0.990716
WL_dwtcoeff_sym2_5.maxd_l2	WL_dwtcoeff_sym2_5_maxd_l2	wavelet,dwt	6743	1001	-0.990715	0.000122046	0.990715
CO_AddNoise_1_std1_10.ami_at_10	CO_AddNoise_1_std1_10_ami_at_10	correlation,AMI,entropy	1228	725	0.990714	0.000122046	0.990714
SB_MotifTwo_mean.udud	SB_MotifTwo_mean_udud	symbolic,motifs	3556	879	-0.990708	0.000122046	0.990708
SP_Summaries_pgram_hamm.logmean	SP_Summaries_pgram_hamm_logmean	spectral	4287	908	-0.990688	0.000122046	0.990688
MF_FitSubsegments_arsbc_rand_25_01.sbcs_min	MF_FitSubsegments_arsbc_rand_25_01_sbcs_min	model,prediction,arfit	7117	1016	-0.990683	0.000122046	0.990683
MF_StateSpace_n4sid_1_05_1.m_aic	MF_StateSpace_n4sid_1_05_1_m_aic	model	7251	1025	-0.990667	0.000122046	0.990667
FC_Surprise_T1_100_4_q_500.min	FC_Surprise_T1_100_4_q_500_min	information,symbolic	2288	782	-0.990666	0.000122046	0.990666
MF_StateSpace_n4sid_3_05_1.m_aic	MF_StateSpace_n4sid_3_05_1_m_aic	model	7334	1027	-0.990653	0.000122046	0.990653
MF_CompareAR_1_10_05.meanv	MF_CompareAR_1_10_05_meanv	model	7380	1029	-0.990651	0.000122046	0.990651
DN_RemovePoints_absfar_08.ac2diff	DN_RemovePoints_absfar_08_ac2diff	correlation,outliers	1722	756	0.990643	0.000122046	0.990643
FC_Surprise_T1_20_2_q_500.median	FC_Surprise_T1_20_2_q_500_median	information,symbolic	2275	780	-0.990641	0.000122046	0.990641
SB_TransitionMatrix_51.TD1	SB_TransitionMatrix_51_TD1	symbolic,transitionmat	1366	734	0.990624	0.000122046	0.990624
NL_TSTL_acp_1_001_025_10_05.ac1_acpf_10	NL_TSTL_acp_1_001_025_10_05_ac1_acpf_10	nonlinear,correlation	5182	925	0.990622	0.000122046	0.990622
AC_3	AC_3	correlation	95	94	0.990617	0.000122046	0.990617
NL_MS_nlpe_fnn_mi.meanabs	NL_MS_nlpe_fnn_mi_meanabs	nonlinear,prediction,model,slow	6884	1006	-0.990616	0.000122046	0.990616
TSTL_localdensity_5_40_1_3.taumiden	TSTL_localdensity_5_40_1_3_taumiden	nonlinear,tstool	5541	940	0.990614	0.000122046	0.990614
CO_CompareMinAMI_even_2_80.mean	CO_CompareMinAMI_even_2_80_mean	correlation,AMI	473	719	0.990603	0.000122046	0.990603
NL_MS_nlpe_fnn_mi.stde	NL_MS_nlpe_fnn_mi_stde	nonlinear,prediction,model,slow	6885	1006	-0.990537	0.000122046	0.990537
SP_Summaries_pgram_hamm.fpoly2csS_p1	SP_Summaries_pgram_hamm_fpoly2csS_p1	spectral	4304	908	-0.990526	0.000122046	0.990526
MF_ARMA_orders_1_6_1_4.aic_min	MF_ARMA_orders_1_6_1_4_aic_min	model	7497	1033	-0.990523	0.000122046	0.990523
MF_armax_1_1_05_1.aic	MF_armax_1_1_05_1_aic	model	7435	1031	-0.990502	0.000122046	0.990502
CO_CompareMinAMI_std2_2_80.median	CO_CompareMinAMI_std2_2_80_median	correlation,AMI	483	720	0.990502	0.000122046	0.990502
NL_MS_nlpe_fnn_mi.mms	NL_MS_nlpe_fnn_mi_mms	nonlinear,prediction,model,slow	6886	1006	-0.990496	0.000122046	0.990496
CO_glscf_2_2_4	CO_glscf_2_2_4	correlation,glscf	518	245	0.990493	0.000122046	0.990493
CO_AddNoise_1_std1_10.pdec	CO_AddNoise_1_std1_10_pdec	correlation,AMI,entropy	1220	725	0.99048	0.000122046	0.99048
MF_ExpSmoothing_05_best.meanabs	MF_ExpSmoothing_05_best_meanabs	model	7509	1034	-0.990477	0.000122046	0.990477
MF_armax_2_2_05_1.aic	MF_armax_2_2_05_1_aic	model	7470	1032	-0.990469	0.000122046	0.990469
SY_LocalDistributions_5_each.mediandiv	SY_LocalDistributions_5_each_mediandiv	stationarity	2212	493	0.990467	0.000122046	0.990467
MF_ARMA_orders_1_6_1_4.mean_all_aics	MF_ARMA_orders_1_6_1_4_mean_all_aics	model	7501	1033	-0.990467	0.000122046	0.990467
SP_Summaries_welch_rect.peakPower_5	SP_Summaries_welch_rect_peakPower_5	spectral	4396	909	0.990459	0.000122046	0.990459
SP_Summaries_fft.peakPower_5	SP_Summaries_fft_peakPower_5	spectral	4520	910	0.990458	0.000122046	0.990458
MF_arfit_1_8_sbc.fpe_4	MF_arfit_1_8_sbc_fpe_4	modelfit,arfit	6776	1002	-0.990456	0.000122046	0.990456
SB_TransitionMatrix_51.stdeigcov	SB_TransitionMatrix_51_stdeigcov	symbolic,transitionmat	1382	734	0.990439	0.000122046	0.990439
FC_Surprise_T1_20_2_q_500.lq	FC_Surprise_T1_20_2_q_500_lq	information,symbolic	2276	780	-0.990433	0.000122046	0.990433
MF_arfit_1_8_sbc.fpe_3	MF_arfit_1_8_sbc_fpe_3	modelfit,arfit	6775	1002	-0.99043	0.000122046	0.99043
MF_arfit_1_8_sbc.fpe_8	MF_arfit_1_8_sbc_fpe_8	modelfit,arfit	6780	1002	-0.990421	0.000122046	0.990421
SB_MotifTwo_median.udud	SB_MotifTwo_median_udud	symbolic,motifs	3588	880	-0.990419	0.000122046	0.990419
MF_GP_LocalPrediction_covSEiso_covNoise_10_3_20_frombefore.meanstderr_run	MF_GP_LocalPrediction_covSEiso_covNoise_10_3_20_frombefore_meanstderr_run	model,GaussianProcess	6539	986	0.990419	0.000122046	0.990419
EN_mse_1-10_2_015_diff1.sampen_s9	EN_mse_1-10_2_015_diff1_sampen_s9	entropy,sampen,controlen,mse	2772	828	0.990418	0.000122046	0.990418
MF_arfit_1_8_sbc.fpe_7	MF_arfit_1_8_sbc_fpe_7	modelfit,arfit	6779	1002	-0.990414	0.000122046	0.990414
MF_arfit_1_8_sbc.fpe_5	MF_arfit_1_8_sbc_fpe_5	modelfit,arfit	6777	1002	-0.990412	0.000122046	0.990412
MF_StateSpaceCompOrder_8.minaic	MF_StateSpaceCompOrder_8_minaic	model	7238	1024	-0.990409	0.000122046	0.990409
ST_LocalExtrema_l50.meanabsext	ST_LocalExtrema_l50_meanabsext	distribution,stationarity	3325	866	-0.990401	0.000122046	0.990401
CO_AddNoise_1_gaussian.ami_at_5	CO_AddNoise_1_gaussian_ami_at_5	correlation,AMI,entropy	1264	727	0.990399	0.000122046	0.990399
MF_arfit_1_8_sbc.fpe_6	MF_arfit_1_8_sbc_fpe_6	modelfit,arfit	6778	1002	-0.990399	0.000122046	0.990399
MF_arfit_1_8_sbc.stdA	MF_arfit_1_8_sbc_stdA	modelfit,arfit	6768	1002	0.990375	0.000122046	0.990375
MF_armax_3_1_05_1.aic	MF_armax_3_1_05_1_aic	model	7402	1030	-0.99036	0.000122046	0.99036
MF_steps_ahead_ss_best_6.maxdiffrms	MF_steps_ahead_ss_best_6_maxdiffrms	model,prediction	7071	1013	0.990346	0.000122046	0.990346
MF_arfit_1_8_sbc.minfpe	MF_arfit_1_8_sbc_minfpe	modelfit,arfit	6781	1002	-0.990342	0.000122046	0.990342
CO_TranslateShape_circle_35_pts.npatmode	CO_TranslateShape_circle_35_pts_npatmode	correlation	1814	764	0.990311	0.000122046	0.990311
CO_TranslateShape_circle_35_pts.sevens	CO_TranslateShape_circle_35_pts_sevens	correlation	1822	764	0.990311	0.000122046	0.990311
SB_MotifTwo_mean.dudu	SB_MotifTwo_mean_dudu	symbolic,motifs	3551	879	-0.990277	0.000122046	0.990277
NL_TSTL_LargestLyap_n1_01_001_3_1_4.ve_minbad	NL_TSTL_LargestLyap_n1_01_001_3_1_4_ve_minbad	nonlinear,tstool	5737	945	-0.990258	0.000122046	0.990258
SC_FluctAnal_mag_2_dfa_50_2_logi.alpha	SC_FluctAnal_mag_2_dfa_50_2_logi_alpha	scaling	4198	905	0.990208	0.000122046	0.990208
MF_GP_hyperparameters_covSEiso_covNoise_1_200_resample.std_mu_data	MF_GP_hyperparameters_covSEiso_covNoise_1_200_resample_std_mu_data	model,GaussianProcess	6465	980	0.990205	0.000122046	0.990205
MF_GP_hyperparameters_covSEiso_covPeriodic_covNoise_1_200_resample.std_mu_data	MF_GP_hyperparameters_covSEiso_covPeriodic_covNoise_1_200_resample_std_mu_data	model,GaussianProcess	6478	981	0.990186	0.000122046	0.990186
CO_Embed2_Shapes_tau_circle_1.ac2	CO_Embed2_Shapes_tau_circle_1_ac2	correlation,embedding	1981	771	0.990181	0.000122046	0.990181
SY_PPtest_0_5_ar_t1.minrmse	SY_PPtest_0_5_ar_t1_minrmse	unitroot	7705	1043	-0.99018	0.000122046	0.99018
MF_AR_arcov_1.res_std	MF_AR_arcov_1_res_std	model,gof	3836	883	-0.99018	0.000122046	0.99018
CO_TranslateShape_circle_35_pts.std	CO_TranslateShape_circle_35_pts_std	correlation	1812	764	-0.990177	0.000122046	0.990177
MF_ExpSmoothing_05_best.mms	MF_ExpSmoothing_05_best_mms	model	7511	1034	-0.990155	0.000122046	0.990155
SB_TransitionMatrix_51.maxeigcov	SB_TransitionMatrix_51_maxeigcov	symbolic,transitionmat	1380	734	0.990146	0.000122046	0.990146
CO_FirstMin_mi-kraskov2_4	firstMin_mi-kraskov2_4	correlation,AMI	204	137	0.990143	0.000122046	0.990143
SB_TransitionpAlphabet_40_1.meandiagfexp_r2	SB_TransitionpAlphabet_40_1_meandiagfexp_r2	symbolic,transitionmat	1449	739	-0.990129	0.000122046	0.990129
CO_FirstMin_mi-kraskov1_4	firstMin_mi-kraskov1_4	correlation,AMI	203	136	0.990071	0.000122046	0.990071
EN_mse_1-10_2_015_diff1.sampen_s8	EN_mse_1-10_2_015_diff1_sampen_s8	entropy,sampen,controlen,mse	2771	828	0.990064	0.000122046	0.990064
FC_Surprise_T1_100_5_q_500.median	FC_Surprise_T1_100_5_q_500_median	information,symbolic	2299	783	-0.990058	0.000122046	0.990058
CO_AddNoise_1_even_10.firstUnder75	CO_AddNoise_1_even_10_firstUnder75	correlation,AMI,entropy	1186	723	-0.990042	0.000122046	0.990042
EN_mse_1-10_2_015_diff1.minSampEn	EN_mse_1-10_2_015_diff1_minSampEn	entropy,sampen,controlen,mse	2776	828	0.990025	0.000122046	0.990025
CO_CompareMinAMI_quantiles_2_80.median	CO_CompareMinAMI_quantiles_2_80_median	correlation,AMI	461	718	0.990018	0.000122046	0.990018
EN_mse_1-10_2_015_diff1.sampen_s10	EN_mse_1-10_2_015_diff1_sampen_s10	entropy,sampen,controlen,mse	2773	828	0.990016	0.000122046	0.990016
SB_MotifThree_quantile.aaaa	SB_MotifThree_quantile_aaaa	symbolic,motifs	3633	881	0.99001	0.000122046	0.99001
PH_Walker_biasprop_05_01.w_std	PH_Walker_biasprop_05_01_w_std	trend	2600	815	0.989993	0.000122046	0.989993
SB_MotifTwo_median.dudu	SB_MotifTwo_median_dudu	symbolic,motifs	3583	880	-0.989982	0.000122046	0.989982
SB_MotifThree_quantile.acba	SB_MotifThree_quantile_acba	symbolic,motifs	3654	881	-0.989975	0.000122046	0.989975
SB_MotifThree_quantile.aac	SB_MotifThree_quantile_aac	symbolic,motifs	3607	881	-0.989969	0.000122046	0.989969
CO_trev_2.denom	CO_trev_2_denom	correlation,nonlinear	1128	709	-0.989962	0.000122046	0.989962
SY_SpreadRandomLocal_50_100.meansampen1_015	SY_SpreadRandomLocal_50_100_meansampen1_015	stationarity	2115	478	-0.989957	0.000122046	0.989957
SP_Summaries_fft_logdev.w_weighted_peak_height	SP_Summaries_fft_logdev_w_weighted_peak_height	spectral	4647	911	-0.98995	0.000122046	0.98995
MF_ExpSmoothing_05_best.stde	MF_ExpSmoothing_05_best_stde	model	7510	1034	-0.989943	0.000122046	0.989943
NL_TISEAN_fnn_1_10_005.nHood2_4	NL_TISEAN_fnn_1_10_005_nHood2_4	nonlinear,dimension,tisean	4878	917	-0.989936	0.000122046	0.989936
EN_SampEn_5_01.sampen2	EN_SampEn_5_01_sampen2	entropy,sampen	2707	821	-0.989936	0.000122046	0.989936
SB_TransitionMatrix_41.stdeigcov	SB_TransitionMatrix_41_stdeigcov	symbolic,transitionmat	1365	733	0.989935	0.000122046	0.989935
CO_CompareMinAMI_even_2_80.mode	CO_CompareMinAMI_even_2_80_mode	correlation,AMI	476	719	0.989901	0.000122046	0.989901
MD_polvar_01_6	MD_polvar_01_6	medical,symbolic	1093	702	-0.9899	0.000122046	0.9899
SB_TransitionpAlphabet_40_1.stdeigfexp_rmse	SB_TransitionpAlphabet_40_1_stdeigfexp_rmse	symbolic,transitionmat	1471	739	-0.9899	0.000122046	0.9899
EN_mse_1-10_2_015_diff1.sampen_s7	EN_mse_1-10_2_015_diff1_sampen_s7	entropy,sampen,controlen,mse	2770	828	0.989874	0.000122046	0.989874
MF_GP_LocalPrediction_covSEiso_covNoise_10_3_20_randomgap.maxmlik	MF_GP_LocalPrediction_covSEiso_covNoise_10_3_20_randomgap_maxmlik	model,GaussianProcess	6572	987	0.989866	0.000122046	0.989866
CO_AddNoise_1_std1_10.ami_at_20	CO_AddNoise_1_std1_10_ami_at_20	correlation,AMI,entropy	1230	725	0.989831	0.000122046	0.989831
AC_nl_004	AC_nl_004	correlation,nonlinearautocorr	167	171	0.989795	0.000122046	0.989795
SB_MotifThree_quantile.abca	SB_MotifThree_quantile_abca	symbolic,motifs	3648	881	-0.989786	0.000122046	0.989786
MF_arfit_1_8_sbc.fpe_2	MF_arfit_1_8_sbc_fpe_2	modelfit,arfit	6774	1002	-0.989786	0.000122046	0.989786
NL_TSTL_acp_1_001_025_10_05.sacpf_8	NL_TSTL_acp_1_001_025_10_05_sacpf_8	nonlinear,correlation	5172	925	0.989785	0.000122046	0.989785
CO_CompareMinAMI_even_2_80.median	CO_CompareMinAMI_even_2_80_median	correlation,AMI	472	719	0.989777	0.000122046	0.989777
FC_Surprise_T1_50_tau_m2quad_500.lq	FC_Surprise_T1_50_tau_m2quad_500_lq	information,symbolic	2498	808	-0.989774	0.000122046	0.989774
CO_Embed2_Basic_1.medianincircle	CO_Embed2_Basic_1_medianincircle	correlation	1553	742	0.989758	0.000122046	0.989758
SB_MotifTwo_median.udd	SB_MotifTwo_median_udd	symbolic,motifs	3573	880	-0.989752	0.000122046	0.989752
IN_AutoMutualInfoStats_40_kraskov1_4.pmaxima	IN_AutoMutualInfoStats_40_kraskov1_4_pmaxima	information,correlation,AMI	366	714	-0.989749	0.000122046	0.989749
MF_armax_2_2_05_1.meanabs	MF_armax_2_2_05_1_meanabs	model	7472	1032	-0.989748	0.000122046	0.989748
AC_nl_1234	AC_nl_1234	correlation,nonlinearautocorr	138	142	0.989736	0.000122046	0.989736
SB_MotifTwo_median.dudd	SB_MotifTwo_median_dudd	symbolic,motifs	3582	880	-0.989734	0.000122046	0.989734
CO_AddNoise_1_quantiles_10.ami_at_5	CO_AddNoise_1_quantiles_10_ami_at_5	correlation,AMI,entropy	1151	721	0.989715	0.000122046	0.989715
MF_GP_hyperparameters_covSEiso_covPeriodic_covNoise_1_200_first.meanS	MF_GP_hyperparameters_covSEiso_covPeriodic_covNoise_1_200_first_meanS	model,GaussianProcess	6506	983	-0.989704	0.000122046	0.989704
CO_TranslateShape_circle_15_pts.npatmode	CO_TranslateShape_circle_15_pts_npatmode	correlation	1784	762	0.989702	0.000122046	0.989702
NL_embed_PCA_1_10.perc_1	NL_embed_PCA_1_10_perc_1	embedding,pca	6957	1008	0.989687	0.000122046	0.989687
CO_AddNoise_1_gaussian.firstUnder25	CO_AddNoise_1_gaussian_firstUnder25	correlation,AMI,entropy	1263	727	-0.98968	0.000122046	0.98968
SB_MotifThree_quantile.cbac	SB_MotifThree_quantile_cbac	symbolic,motifs	3698	881	-0.989674	0.000122046	0.989674
MF_StateSpace_n4sid_2_05_1.meanabs	MF_StateSpace_n4sid_2_05_1_meanabs	model	7291	1026	-0.989673	0.000122046	0.989673
MD_polvar_01_5	MD_polvar_01_5	medical,symbolic	1087	696	-0.989669	0.000122046	0.989669
FC_Surprise_T2_50_tau_m2quad_500.min	FC_Surprise_T2_50_tau_m2quad_500_min	information,symbolic	2502	809	-0.989664	0.000122046	0.989664
SB_MotifThree_quantile.caa	SB_MotifThree_quantile_caa	symbolic,motifs	3623	881	-0.98965	0.000122046	0.98965
PH_Walker_runningvar_15_50.w_ac2	PH_Walker_runningvar_15_50_w_ac2	trend	2682	819	0.98965	0.000122046	0.98965
EN_mse_1-10_2_015_diff1.meanSampEn	EN_mse_1-10_2_015_diff1_meanSampEn	entropy,sampen,controlen,mse	2778	828	0.989638	0.000122046	0.989638
SB_MotifThree_quantile.aaca	SB_MotifThree_quantile_aaca	symbolic,motifs	3639	881	-0.989624	0.000122046	0.989624
SP_Summaries_pgram_hamm.std	SP_Summaries_pgram_hamm_std	spectral	4283	908	0.989616	0.000122046	0.989616
FC_Surprise_T1_20_tau_m2quad_500.mean	FC_Surprise_T1_20_tau_m2quad_500_mean	information,symbolic	2488	807	-0.989595	0.000122046	0.989595
SB_BinaryStats_mean.meanstretch0	SB_BinaryStats_mean_meanstretch0	distribution,stationarity	3480	876	0.989591	0.000122046	0.989591
CO_HistogramAMI_std2_2.ami2	CO_HistogramAMI_std2_2_2	information,correlation,AMI	223	209	0.989581	0.000122046	0.989581
IN_AutoMutualInfoStats_40_kraskov1_4.pcrossmean	IN_AutoMutualInfoStats_40_kraskov1_4_pcrossmean	information,correlation,AMI	372	714	-0.989573	0.000122046	0.989573
MF_armax_2_2_05_1.stde	MF_armax_2_2_05_1_stde	model	7473	1032	-0.98957	0.000122046	0.98957
TSTL_localdensity_5_40_ac_2.ac1den	TSTL_localdensity_5_40_ac_2_ac1den	nonlinear,tstool	5521	939	0.989569	0.000122046	0.989569
SB_MotifTwo_mean.uddu	SB_MotifTwo_mean_uddu	symbolic,motifs	3555	879	-0.989566	0.000122046	0.989566
MF_StateSpace_n4sid_3_05_1.meanabs	MF_StateSpace_n4sid_3_05_1_meanabs	model	7336	1027	-0.989531	0.000122046	0.989531
SB_MotifTwo_median.ddu	SB_MotifTwo_median_ddu	symbolic,motifs	3570	880	-0.989529	0.000122046	0.989529
SB_MotifThree_quantile.ac	SB_MotifThree_quantile_ac	symbolic,motifs	3597	881	-0.989528	0.000122046	0.989528
SP_Summaries_fft_logdev.w_weighted_peak_prom	SP_Summaries_fft_logdev_w_weighted_peak_prom	spectral	4646	911	-0.989528	0.000122046	0.989528
WL_fBM.p3	WL_fBM_p3	wavelet	6718	999	0.989515	0.000122046	0.989515
MF_GP_hyperparameters_covSEiso_covNoise_1_50_random_i.h3	MF_GP_hyperparameters_covSEiso_covNoise_1_50_random_i_h3	model,GaussianProcess	6511	984	-0.989512	0.000122046	0.989512
SY_TISEAN_nstat_z_4_1_3.median	SY_TISEAN_nstat_z_4_1_3_median	nonlinear,tisean,model,stationarity	4903	918	-0.98951	0.000122046	0.98951
MF_StateSpace_n4sid_2_05_1.stde	MF_StateSpace_n4sid_2_05_1_stde	model	7292	1026	-0.989502	0.000122046	0.989502
MF_FitSubsegments_arsbc_uniform_25_01.sbcs_mean	MF_FitSubsegments_arsbc_uniform_25_01_sbcs_mean	model,prediction,arfit	7103	1015	-0.989501	0.000122046	0.989501
SB_MotifThree_quantile.acaa	SB_MotifThree_quantile_acaa	symbolic,motifs	3651	881	-0.9895	0.000122046	0.9895
SB_MotifThree_quantile.cabc	SB_MotifThree_quantile_cabc	symbolic,motifs	3692	881	-0.989499	0.000122046	0.989499
MD_polvar_01_3	MD_polvar_01_3	medical,symbolic	1084	693	-0.989497	0.000122046	0.989497
SB_MotifThree_quantile.abc	SB_MotifThree_quantile_abc	symbolic,motifs	3610	881	-0.989496	0.000122046	0.989496
SP_Summaries_pgram_hamm.area_2_1	SP_Summaries_pgram_hamm_area_2_1	spectral	4344	908	0.989493	0.000122046	0.989493
MF_GP_LocalPrediction_covSEiso_covNoise_10_3_20_frombefore.stdmlik	MF_GP_LocalPrediction_covSEiso_covNoise_10_3_20_frombefore_stdmlik	model,GaussianProcess	6556	986	0.989489	0.000122046	0.989489
SC_FluctAnal_2_dfa_50_2_logi.meanssr	SC_FluctAnal_2_dfa_50_2_logi_meanssr	scaling	4110	901	0.989468	0.000122046	0.989468
MD_polvar_01_4	MD_polvar_01_4	medical,symbolic	1090	699	-0.98946	0.000122046	0.98946
MF_StateSpace_n4sid_2_05_1.mms	MF_StateSpace_n4sid_2_05_1_mms	model	7293	1026	-0.989443	0.000122046	0.989443
SP_Summaries_pgram_hamm.area_5_2	SP_Summaries_pgram_hamm_area_5_2	spectral	4370	908	-0.98944	0.000122046	0.98944
CO_AddNoise_1_std1_10.firstUnder75	CO_AddNoise_1_std1_10_firstUnder75	correlation,AMI,entropy	1224	725	-0.989438	0.000122046	0.989438
WL_coeffs_db3_2.max_coeff	WL_coeffs_db3_2_max_coeff	wavelet	6667	994	-0.989432	0.000122046	0.989432
MF_armax_3_1_05_1.meanabs	MF_armax_3_1_05_1_meanabs	model	7404	1030	-0.989428	0.000122046	0.989428
SB_MotifThree_quantile.ca	SB_MotifThree_quantile_ca	symbolic,motifs	3601	881	-0.989411	0.000122046	0.989411
NL_TSTL_LargestLyap_n1_01_001_3_1_4.ve_rmsres	NL_TSTL_LargestLyap_n1_01_001_3_1_4_ve_rmsres	nonlinear,tstool	5734	945	-0.989391	0.000122046	0.989391
FC_Surprise_T2_20_2_q_500.mean	FC_Surprise_T2_20_2_q_500_mean	information,symbolic	2306	784	-0.989382	0.000122046	0.989382
MF_armax_2_2_05_1.mms	MF_armax_2_2_05_1_mms	model	7474	1032	-0.989376	0.000122046	0.989376
NL_TISEAN_fnn_1_10_005.nHood2_3	NL_TISEAN_fnn_1_10_005_nHood2_3	nonlinear,dimension,tisean	4877	917	-0.989372	0.000122046	0.989372
TSTL_localdensity_5_40_1_3.meanden	TSTL_localdensity_5_40_1_3_meanden	nonlinear,tstool	5533	940	-0.989351	0.000122046	0.989351
MF_StateSpace_n4sid_3_05_1.stde	MF_StateSpace_n4sid_3_05_1_stde	model	7337	1027	-0.989344	0.000122046	0.989344
SB_TransitionpAlphabet_40_1.stdeigfexp_a	SB_TransitionpAlphabet_40_1_stdeigfexp_a	symbolic,transitionmat	1468	739	-0.989328	0.000122046	0.989328
CO_AddNoise_1_gaussian.fitexprmse	CO_AddNoise_1_gaussian_fitexprmse	correlation,AMI,entropy	1271	727	0.98932	0.000122046	0.98932
SB_TransitionMatrix_41.maxeigcov	SB_TransitionMatrix_41_maxeigcov	symbolic,transitionmat	1363	733	0.989314	0.000122046	0.989314
SY_LocalDistributions_5_each.meandiv	SY_LocalDistributions_5_each_meandiv	stationarity	2211	493	0.989291	0.000122046	0.989291
IN_AutoMutualInfoStats_diff_20_kraskov1_4.stdami	IN_AutoMutualInfoStats_diff_20_kraskov1_4_stdami	information,correlation,AMI	433	716	-0.989284	0.000122046	0.989284
MF_GP_LocalPrediction_covSEiso_covNoise_10_3_20_frombefore.maxmlik	MF_GP_LocalPrediction_covSEiso_covNoise_10_3_20_frombefore_maxmlik	model,GaussianProcess	6554	986	0.989282	0.000122046	0.989282
IN_AutoMutualInfoStats_40_kraskov1_4.mami	IN_AutoMutualInfoStats_40_kraskov1_4_mami	information,correlation,AMI	362	714	0.989277	0.000122046	0.989277
MF_armax_1_1_05_1.meanabs	MF_armax_1_1_05_1_meanabs	model	7437	1031	-0.989264	0.000122046	0.989264
MF_StateSpace_n4sid_3_05_1.mms	MF_StateSpace_n4sid_3_05_1_mms	model	7338	1027	-0.989263	0.000122046	0.989263
PH_Walker_momentum_5.w_std	PH_Walker_momentum_5_w_std	trend	2660	818	0.989255	0.000122046	0.989255
MF_armax_3_1_05_1.stde	MF_armax_3_1_05_1_stde	model	7405	1030	-0.989211	0.000122046	0.989211
FC_Surprise_dist_100_5_q_500.std	FC_Surprise_dist_100_5_q_500_std	information,symbolic	2270	779	0.989201	0.000122046	0.989201
SB_MotifThree_quantile.aaac	SB_MotifThree_quantile_aaac	symbolic,motifs	3635	881	-0.989195	0.000122046	0.989195
SB_MotifTwo_median.ddud	SB_MotifTwo_median_ddud	symbolic,motifs	3580	880	-0.989191	0.000122046	0.989191
CO_HistogramAMI_std2_2.ami1	CO_HistogramAMI_std2_2_1	information,correlation,AMI	222	209	0.989157	0.000122046	0.989157
SB_TransitionpAlphabet_40_1.symd_a	SB_TransitionpAlphabet_40_1_symd_a	symbolic,transitionmat	1461	739	-0.989147	0.000122046	0.989147
MF_armax_3_1_05_1.mms	MF_armax_3_1_05_1_mms	model	7406	1030	-0.989142	0.000122046	0.989142
SY_TISEAN_nstat_z_4_1_3.mean	SY_TISEAN_nstat_z_4_1_3_mean	nonlinear,tisean,model,stationarity	4902	918	-0.989139	0.000122046	0.989139
SP_Summaries_welch_rect.area_5_2	SP_Summaries_welch_rect_area_5_2	spectral	4494	909	-0.989132	0.000122046	0.989132
SP_Summaries_fft.area_5_2	SP_Summaries_fft_area_5_2	spectral	4618	910	-0.989132	0.000122046	0.989132
SD_TSTL_surrogates_mi_100_2_trev.stdsurr	SD_TSTL_surrogates_mi_100_2_trev_stdsurr	nonlinear,tstool,correlation,surrogate	5861	958	0.989111	0.000122046	0.989111
FC_Surprise_T2_50_3_q_500.min	FC_Surprise_T2_50_3_q_500_min	information,symbolic	2312	785	-0.989095	0.000122046	0.989095
EN_mse_1-10_2_015_diff1.sampen_s6	EN_mse_1-10_2_015_diff1_sampen_s6	entropy,sampen,controlen,mse	2769	828	0.989091	0.000122046	0.989091
PH_Walker_biasprop_05_01.sw_propcross	PH_Walker_biasprop_05_01_sw_propcross	trend	2612	815	-0.98907	0.000122046	0.98907
NL_TSTL_LargestLyap_n1_01_001_3_1_4.ve_meanabsres	NL_TSTL_LargestLyap_n1_01_001_3_1_4_ve_meanabsres	nonlinear,tstool	5733	945	-0.989054	0.000122046	0.989054
MF_armax_1_1_05_1.stde	MF_armax_1_1_05_1_stde	model	7438	1031	-0.989041	0.000122046	0.989041
SB_TransitionMatrix_51.stddiag	SB_TransitionMatrix_51_stddiag	symbolic,transitionmat	1372	734	0.989014	0.000122046	0.989014
SP_Summaries_fft_logdev.statav5_m	SP_Summaries_fft_logdev_statav5_m	spectral	4750	911	0.989008	0.000122046	0.989008
SB_MotifTwo_median.uddu	SB_MotifTwo_median_uddu	symbolic,motifs	3587	880	-0.988995	0.000122046	0.988995
MF_StateSpace_n4sid_1_05_1.meanabs	MF_StateSpace_n4sid_1_05_1_meanabs	model	7253	1025	-0.988994	0.000122046	0.988994
IN_AutoMutualInfoStats_40_gaussian.mami	IN_AutoMutualInfoStats_40_gaussian_mami	information,correlation,AMI	307	713	0.988993	0.000122046	0.988993
SY_SpreadRandomLocal_ac5_100.meanac2	SY_SpreadRandomLocal_ac5_100_meanac2	stationarity	2101	477	0.988991	0.000122046	0.988991
SB_MotifThree_quantile.acc	SB_MotifThree_quantile_acc	symbolic,motifs	3613	881	-0.988989	0.000122046	0.988989
SB_MotifThree_quantile.cbab	SB_MotifThree_quantile_cbab	symbolic,motifs	3697	881	-0.988967	0.000122046	0.988967
MF_armax_1_1_05_1.mms	MF_armax_1_1_05_1_mms	model	7439	1031	-0.988962	0.000122046	0.988962
SB_TransitionpAlphabet_40_1.maxdiagfexp_r2	SB_TransitionpAlphabet_40_1_maxdiagfexp_r2	symbolic,transitionmat	1453	739	-0.988942	0.000122046	0.988942
SB_MotifThree_quantile.cca	SB_MotifThree_quantile_cca	symbolic,motifs	3629	881	-0.988908	0.000122046	0.988908
SP_Summaries_fft_logdev.statav3_s	SP_Summaries_fft_logdev_statav3_s	spectral	4729	911	0.988908	0.000122046	0.988908
SC_FluctAnal_2_dfa_50_1_logi.ssr	SC_FluctAnal_2_dfa_50_1_logi_ssr	scaling	4081	900	0.988907	0.000122046	0.988907
CO_AddNoise_1_even_10.fitlinb	CO_AddNoise_1_even_10_fitlinb	correlation,AMI,entropy	1198	723	0.988903	0.000122046	0.988903
WL_dwtcoeff_sym2_5.mind_l2	WL_dwtcoeff_sym2_5_mind_l2	wavelet,dwt	6744	1001	0.988889	0.000122046	0.988889
SY_TISEAN_nstat_z_4_1_3.maxeig	SY_TISEAN_nstat_z_4_1_3_maxeig	nonlinear,tisean,model,stationarity	4927	918	-0.988871	0.000122046	0.988871
ST_MomentCorr_002_02_mean_std_abs.density	ST_MomentCorr_002_02_mean_std_abs_density	statistics	7824	1058	0.988852	0.000122046	0.988852
WL_cwt_db3_32.gam2	WL_cwt_db3_32_gam2	wavelet,cwt	6597	989	0.988819	0.000122046	0.988819
CO_AddNoise_1_std1_10.ami_at_5	CO_AddNoise_1_std1_10_ami_at_5	correlation,AMI,entropy	1227	725	0.988816	0.000122046	0.988816
SB_MotifThree_quantile.cacc	SB_MotifThree_quantile_cacc	symbolic,motifs	3695	881	-0.988809	0.000122046	0.988809
SC_FluctAnal_sign_2_dfa_50_2_logi.meanssr	SC_FluctAnal_sign_2_dfa_50_2_logi_meanssr	scaling	4230	906	0.988783	0.000122046	0.988783
CO_Embed2_Basic_1.updiag01	CO_Embed2_Basic_1_updiag01	correlation	1526	742	0.988766	0.000122046	0.988766
CO_Embed2_Shapes_tau_circle_01.ac2	CO_Embed2_Shapes_tau_circle_01_ac2	correlation,embedding	1967	770	0.988743	0.000122046	0.988743
FC_Surprise_dist_5_2_q_500.tstat	FC_Surprise_dist_5_2_q_500_tstat	information,symbolic	2239	775	0.988742	0.000122046	0.988742
FC_LocalSimple_mean3.ac1	FC_LocalSimple_mean3_ac1	forecasting	3014	835	0.98874	0.000122046	0.98874
FC_LocalSimple_mean1.swm	FC_LocalSimple_mean1_swm	forecasting	2992	833	0.98874	0.000122046	0.98874
MF_StateSpace_n4sid_1_05_1.stde	MF_StateSpace_n4sid_1_05_1_stde	model	7254	1025	-0.988736	0.000122046	0.988736
SP_Summaries_fft_logdev.linfitsemilog_all_a2	SP_Summaries_fft_logdev_linfitsemilog_all_a2	spectral	4712	911	-0.988735	0.000122046	0.988735
SB_BinaryStats_iqr.stdstretch0	SB_BinaryStats_iqr_stdstretch0	distribution,stationarity	3495	877	0.988734	0.000122046	0.988734
MF_StateSpace_n4sid_1_05_1.mms	MF_StateSpace_n4sid_1_05_1_mms	model	7255	1025	-0.988697	0.000122046	0.988697
CO_AddNoise_1_kraskov1_4.fitlinb	CO_AddNoise_1_kraskov1_4_fitlinb	correlation,AMI,entropy	1311	729	0.988696	0.000122046	0.988696
MF_GP_hyperparameters_covSEiso_covNoise_1_50_random_i.minS	MF_GP_hyperparameters_covSEiso_covNoise_1_50_random_i_minS	model,GaussianProcess	6519	984	-0.988694	0.000122046	0.988694
PH_Walker_prop_05.sw_distdiff	PH_Walker_prop_05_sw_distdiff	trend	2554	812	-0.988688	0.000122046	0.988688
AC_nl_044	AC_nl_044	correlation,nonlinearautocorr	161	165	0.988685	0.000122046	0.988685
SP_Summaries_fft_logdev.statav2_s	SP_Summaries_fft_logdev_statav2_s	spectral	4721	911	0.988674	0.000122046	0.988674
CP_ML_StepDetect_l1pwc_10.pshort_3	CP_ML_StepDetect_l1pwc_10_pshort_3	stepdetection	7773	1052	0.98867	0.000122046	0.98867
SY_LocalDistributions_5_par.meandiv	SY_LocalDistributions_5_par_meandiv	stationarity	2199	489	0.98865	0.000122046	0.98865
MF_GP_LocalPrediction_covSEiso_covNoise_10_3_20_frombefore.meanlogh2	MF_GP_LocalPrediction_covSEiso_covNoise_10_3_20_frombefore_meanlogh2	model,GaussianProcess	6550	986	0.988636	0.000122046	0.988636
MF_ExpSmoothing_05_best.alphamin	MF_ExpSmoothing_05_best_alphamin	model	7507	1034	0.988635	0.000122046	0.988635
ST_LocalExtrema_l100.minabsmin	ST_LocalExtrema_l100_minabsmin	distribution,stationarity	3335	867	-0.988634	0.000122046	0.988634
NL_TSTL_FractalDimensions_2_100_02_1_5_10_32_1_5.maxDq	NL_TSTL_FractalDimensions_2_100_02_1_5_10_32_1_5_maxDq	nonlinear,tstool,dimension,correlation,stochastic	5483	936	-0.988629	0.000122046	0.988629
CO_Embed2_Basic_1.ratdiag05	CO_Embed2_Basic_1_ratdiag05	correlation	1531	742	0.988629	0.000122046	0.988629
AC_nl_026	AC_nl_026	correlation,nonlinearautocorr	181	185	0.988619	0.000122046	0.988619
EN_mse_1-10_2_015_diff1.sampen_s5	EN_mse_1-10_2_015_diff1_sampen_s5	entropy,sampen,controlen,mse	2768	828	0.988608	0.000122046	0.988608
SY_SpreadRandomLocal_100_100.meansampen1_015	SY_SpreadRandomLocal_100_100_meansampen1_015	stationarity	2131	479	-0.988605	0.000122046	0.988605
SY_LocalDistributions_5_par.mediandiv	SY_LocalDistributions_5_par_mediandiv	stationarity	2200	489	0.988598	0.000122046	0.988598
NL_TSTL_FractalDimensions_2_100_02_1_5_10_32_1_5.linfit_b	NL_TSTL_FractalDimensions_2_100_02_1_5_10_32_1_5_linfit_b	nonlinear,tstool,dimension,correlation,stochastic	5489	936	-0.988578	0.000122046	0.988578
SC_FluctAnal_mag_2_dfa_50_2_logi.linfitint	SC_FluctAnal_mag_2_dfa_50_2_logi_linfitint	scaling	4197	905	-0.988576	0.000122046	0.988576
SP_Summaries_fft_logdev.statav4_m	SP_Summaries_fft_logdev_statav4_m	spectral	4738	911	0.98857	0.000122046	0.98857
SB_MotifThree_quantile.ccac	SB_MotifThree_quantile_ccac	symbolic,motifs	3707	881	-0.988568	0.000122046	0.988568
SY_TISEAN_nstat_z_5_1_3.mean	SY_TISEAN_nstat_z_5_1_3_mean	nonlinear,tisean,model,stationarity	4929	919	-0.988525	0.000122046	0.988525
EN_MS_LZcomplexity_5	EN_MS_LZcomplexity_5	entropy,mex	1064	667	-0.988508	0.000122046	0.988508
TSTL_localdensity_5_40_ac_2.taumiden	TSTL_localdensity_5_40_ac_2_taumiden	nonlinear,tstool	5527	939	0.988503	0.000122046	0.988503
FC_Surprise_T1_20_2_q_500.mean	FC_Surprise_T1_20_2_q_500_mean	information,symbolic	2274	780	-0.98849	0.000122046	0.98849
EN_MS_LZcomplexity_4	EN_MS_LZcomplexity_4	entropy,mex	1063	666	-0.988488	0.000122046	0.988488
EX_MovingThreshold_01_002.stdkickf	EX_MovingThreshold_01_002_stdkickf	outliers	3439	872	0.988481	0.000122046	0.988481
EN_MS_LZcomplexity_6	EN_MS_LZcomplexity_6	entropy,mex	1065	668	-0.988479	0.000122046	0.988479
EN_MS_LZcomplexity_10	EN_MS_LZcomplexity_10	entropy,mex	1069	672	-0.988476	0.000122046	0.988476
MF_FitSubsegments_arsbc_rand_25_01.sbcs_mean	MF_FitSubsegments_arsbc_rand_25_01_sbcs_mean	model,prediction,arfit	7114	1016	-0.988474	0.000122046	0.988474
SB_MotifThree_quantile.caaa	SB_MotifThree_quantile_caaa	symbolic,motifs	3687	881	-0.988473	0.000122046	0.988473
CO_trev_1.denom	CO_trev_1_denom	correlation,nonlinear	1123	708	-0.988459	0.000122046	0.988459
FC_Surprise_dist_5_2_q_500.mean	FC_Surprise_dist_5_2_q_500_mean	information,symbolic	2234	775	-0.988454	0.000122046	0.988454
PH_Walker_biasprop_01_05.sw_minrat	PH_Walker_biasprop_01_05_sw_minrat	trend	2630	816	0.988452	0.000122046	0.988452
NL_TSTL_acp_1_001_025_10_05.sacpf_7	NL_TSTL_acp_1_001_025_10_05_sacpf_7	nonlinear,correlation	5168	925	0.988442	0.000122046	0.988442
CO_AddNoise_1_even_10.fitlina	CO_AddNoise_1_even_10_fitlina	correlation,AMI,entropy	1197	723	-0.988434	0.000122046	0.988434
FC_Surprise_T1_50_3_q_500.mean	FC_Surprise_T1_50_3_q_500_mean	information,symbolic	2282	781	-0.988421	0.000122046	0.988421
FC_LocalSimple_median3.ac1	FC_LocalSimple_median3_ac1	forecasting	3065	839	0.988417	0.000122046	0.988417
EN_MS_LZcomplexity_9	EN_MS_LZcomplexity_9	entropy,mex	1068	671	-0.988406	0.000122046	0.988406
FC_Surprise_T2_100_5_q_500.max	FC_Surprise_T2_100_5_q_500_max	information,symbolic	2329	787	0.988381	0.000122046	0.988381
ST_LocalExtrema_l50.minmax	ST_LocalExtrema_l50_minmax	distribution,stationarity	3312	866	-0.988378	0.000122046	0.988378
CO_Embed2_AngleTau_50.diff_thetaac12	CO_Embed2_AngleTau_50_diff_thetaac12	correlation,embedding	1953	768	-0.988377	0.000122046	0.988377
EN_MS_LZcomplexity_3	EN_MS_LZcomplexity_3	entropy,mex	1062	665	-0.988375	0.000122046	0.988375
EN_MS_LZcomplexity_8	EN_MS_LZcomplexity_8	entropy,mex	1067	670	-0.988372	0.000122046	0.988372
NL_TISEAN_fnn_mi_10_005.pfnn_8	NL_TISEAN_fnn_mi_10_005_pfnn_8	nonlinear,dimension,tisean	4846	916	-0.98837	0.000122046	0.98837
CO_AddNoise_1_gaussian.fitlinb	CO_AddNoise_1_gaussian_fitlinb	correlation,AMI,entropy	1273	727	0.988348	0.000122046	0.988348
CO_AddNoise_1_kraskov1_4.fitlina	CO_AddNoise_1_kraskov1_4_fitlina	correlation,AMI,entropy	1310	729	-0.988343	0.000122046	0.988343
NL_TSTL_LargestLyap_n1_01_001_3_1_4.maxp	NL_TSTL_LargestLyap_n1_01_001_3_1_4_maxp	nonlinear,tstool	5718	945	0.988341	0.000122046	0.988341
CO_HistogramAMI_std2_5.ami2	CO_HistogramAMI_std2_5_2	information,correlation,AMI	228	210	0.988336	0.000122046	0.988336
SP_Summaries_fft.mean	SP_Summaries_fft_mean	spectral	4534	910	-0.988329	0.000122046	0.988329
CO_glscf_1_5_4	CO_glscf_1_5_4	correlation,glscf	506	233	0.988295	0.000122046	0.988295
EN_MS_LZcomplexity_7	EN_MS_LZcomplexity_7	entropy,mex	1066	669	-0.988294	0.000122046	0.988294
FC_Surprise_T1_100_4_q_500.mean	FC_Surprise_T1_100_4_q_500_mean	information,symbolic	2290	782	-0.988291	0.000122046	0.988291
PH_Walker_prop_11.sw_maxrat	PH_Walker_prop_11_sw_maxrat	trend	2591	814	-0.988269	0.000122046	0.988269
MF_FitSubsegments_arma_2_2_uniform_25_01.p_1_mean	MF_FitSubsegments_arma_2_2_uniform_25_01_p_1_mean	model,prediction	7143	1019	-0.988233	0.000122046	0.988233
SP_Summaries_pgram_hamm.linfitloglog_all_a1	SP_Summaries_pgram_hamm_linfitloglog_all_a1	spectral	4319	908	-0.98823	0.000122046	0.98823
SY_SlidingWindow_mom3_sampen5_10	SY_SlidingWindow_mom3_sampen5_10	stationarity	659	386	0.988227	0.000122046	0.988227
TSTL_localdensity_5_40_1_3.minden	TSTL_localdensity_5_40_1_3_minden	nonlinear,tstool	5528	940	-0.988225	0.000122046	0.988225
SY_TISEAN_nstat_z_5_1_3.maxeig	SY_TISEAN_nstat_z_5_1_3_maxeig	nonlinear,tisean,model,stationarity	4954	919	-0.988216	0.000122046	0.988216
ST_LocalExtrema_n25.minmax	ST_LocalExtrema_n25_minmax	distribution,stationarity	3356	868	-0.98821	0.000122046	0.98821
CO_HistogramAMI_even_5.ami2	CO_HistogramAMI_even_5_2	information,correlation,AMI	243	213	0.988194	0.000122046	0.988194
SB_MotifTwo_mean.udd	SB_MotifTwo_mean_udd	symbolic,motifs	3541	879	-0.988188	0.000122046	0.988188
CO_TranslateShape_circle_15_pts.twos	CO_TranslateShape_circle_15_pts_twos	correlation	1787	762	-0.988183	0.000122046	0.988183
SP_Summaries_pgram_hamm.peakPower_5	SP_Summaries_pgram_hamm_peakPower_5	spectral	4272	908	0.988181	0.000122046	0.988181
SP_Summaries_fft_logdev.statav3_m	SP_Summaries_fft_logdev_statav3_m	spectral	4728	911	0.988161	0.000122046	0.988161
CO_trev_3.denom	CO_trev_3_denom	correlation,nonlinear	1133	710	-0.988143	0.000122046	0.988143
FC_LocalSimple_lfittau.ac1	FC_LocalSimple_lfittau_ac1	forecasting	3134	846	0.988123	0.000122046	0.988123
FC_Surprise_T1_50_tau_m2quad_500.min	FC_Surprise_T1_50_tau_m2quad_500_min	information,symbolic	2494	808	-0.988111	0.000122046	0.988111
SY_SlidingWindow_s_sampen10_1	SY_SlidingWindow_s_sampen10_1	stationarity	592	319	0.988079	0.000122046	0.988079
TSTL_localdensity_5_40_ac_2.ac3den	TSTL_localdensity_5_40_ac_2_ac3den	nonlinear,tstool	5523	939	0.988062	0.000122046	0.988062
SY_TISEAN_nstat_z_5_1_3.median	SY_TISEAN_nstat_z_5_1_3_median	nonlinear,tisean,model,stationarity	4930	919	-0.988032	0.000122046	0.988032
EN_mse_1-10_2_015_diff1.sampen_s4	EN_mse_1-10_2_015_diff1_sampen_s4	entropy,sampen,controlen,mse	2767	828	0.988019	0.000122046	0.988019
IN_AutoMutualInfoStats_40_kraskov1_4.pextrema	IN_AutoMutualInfoStats_40_kraskov1_4_pextrema	information,correlation,AMI	364	714	-0.987999	0.000122046	0.987999
IN_AutoMutualInfoStats_40_kraskov1_4.ami2	IN_AutoMutualInfoStats_40_kraskov1_4_ami2	information,correlation,AMI	323	714	0.987973	0.000122046	0.987973
FC_Surprise_T2_100_4_q_500.max	FC_Surprise_T2_100_4_q_500_max	information,symbolic	2321	786	0.987967	0.000122046	0.987967
SP_Summaries_fft.linfitloglog_all_a1	SP_Summaries_fft_linfitloglog_all_a1	spectral	4567	910	-0.987963	0.000122046	0.987963
SP_Summaries_welch_rect.linfitloglog_all_a1	SP_Summaries_welch_rect_linfitloglog_all_a1	spectral	4443	909	-0.987961	0.000122046	0.987961
TSTL_localdensity_5_40_1_3.ac4den	TSTL_localdensity_5_40_1_3_ac4den	nonlinear,tstool	5538	940	0.987955	0.000122046	0.987955
SB_MotifTwo_mean.ddu	SB_MotifTwo_mean_ddu	symbolic,motifs	3538	879	-0.987951	0.000122046	0.987951
SB_MotifThree_diffquant.hhhh	SB_MotifThree_diffquant_hhhh	symbolic,motifs	3834	882	0.987951	0.000122046	0.987951
MS_shannon_2t10_4.medent	MS_shannon_2t10_4_medent	entropy,mex	6921	687	-0.987929	0.000122046	0.987929
FC_Surprise_T1_10_1_m2quad_500.uq	FC_Surprise_T1_10_1_m2quad_500_uq	information,symbolic	2475	805	-0.987925	0.000122046	0.987925
CO_AddNoise_1_quantiles_10.fitlinb	CO_AddNoise_1_quantiles_10_fitlinb	correlation,AMI,entropy	1160	721	0.987914	0.000122046	0.987914
PH_Walker_momentum_2.w_propzcross	PH_Walker_momentum_2_w_momentumzcross	trend	2646	817	-0.987901	0.000122046	0.987901
CO_AddNoise_1_quantiles_10.pdec	CO_AddNoise_1_quantiles_10_pdec	correlation,AMI,entropy	1144	721	0.987896	0.000122046	0.987896
CO_HistogramAMI_even_5.ami1	CO_HistogramAMI_even_5_1	information,correlation,AMI	242	213	0.987863	0.000122046	0.987863
CO_HistogramAMI_std2_10.ami2	CO_HistogramAMI_std2_10_2	information,correlation,AMI	233	211	0.987859	0.000122046	0.987859
CO_Embed2_Basic_1.ratdiag01	CO_Embed2_Basic_1_ratdiag01	correlation	1530	742	0.987855	0.000122046	0.987855
SP_Summaries_pgram_hamm.fpoly2_r2	SP_Summaries_pgram_hamm_fpoly2_r2	spectral	4308	908	-0.987851	0.000122046	0.987851
EN_SampEn_5_015.sampen3	EN_SampEn_5_015_sampen3	entropy,sampen	2715	822	-0.987842	0.000122046	0.987842
SY_SlidingWindow_sampen_sampen10_10	SY_SlidingWindow_sampen_sampen10_10	stationarity	639	366	-0.987821	0.000122046	0.987821
CO_HistogramAMI_even_10.ami2	CO_HistogramAMI_even_10_2	information,correlation,AMI	248	214	0.987809	0.000122046	0.987809
MF_ExpSmoothing_05_best.alphamin_1	MF_ExpSmoothing_05_best_alphamin_1	model	7504	1034	0.987792	0.000122046	0.987792
MF_CompareAR_1_10_05.maxv	MF_CompareAR_1_10_05_maxv	model	7378	1029	-0.987792	0.000122046	0.987792
CO_CompareMinAMI_quantiles_2_80.mode	CO_CompareMinAMI_quantiles_2_80_mode	correlation,AMI	465	718	0.987789	0.000122046	0.987789
SY_TISEAN_nstat_z_4_1_3.stdeig	SY_TISEAN_nstat_z_4_1_3_stdeig	nonlinear,tisean,model,stationarity	4925	918	-0.987788	0.000122046	0.987788
FC_Surprise_T2_20_2_q_500.median	FC_Surprise_T2_20_2_q_500_median	information,symbolic	2307	784	-0.987783	0.000122046	0.987783
EN_mse_1-10_2_015_diff1.sampen_s3	EN_mse_1-10_2_015_diff1_sampen_s3	entropy,sampen,controlen,mse	2766	828	0.987765	0.000122046	0.987765
SB_MotifThree_quantile.cba	SB_MotifThree_quantile_cba	symbolic,motifs	3626	881	-0.987759	0.000122046	0.987759
SC_FluctAnal_2_rsrange_50_logi.ssr	SC_FluctAnal_2_rsrange_50_logi_ssr	scaling	4009	897	0.987742	0.000122046	0.987742
SB_MotifThree_quantile.bcac	SB_MotifThree_quantile_bcac	symbolic,motifs	3680	881	-0.987741	0.000122046	0.987741
SY_SpreadRandomLocal_200_100.meansampen1_015	SY_SpreadRandomLocal_200_100_meansampen1_015	stationarity	2147	480	-0.98774	0.000122046	0.98774
CO_RM_AMInformation_2	RM_ami_2	information,correlation,AMI	193	197	0.987739	0.000122046	0.987739
CO_Embed2_Shapes_tau_circle_1.ac1	CO_Embed2_Shapes_tau_circle_1_ac1	correlation,embedding	1980	771	0.987737	0.000122046	0.987737
MF_GP_hyperparameters_covSEiso_covNoise_1_50_random_i.logh3	MF_GP_hyperparameters_covSEiso_covNoise_1_50_random_i_logh3	model,GaussianProcess	6512	984	-0.98772	0.000122046	0.98772
SB_MotifThree_quantile.cacb	SB_MotifThree_quantile_cacb	symbolic,motifs	3694	881	-0.987719	0.000122046	0.987719
WL_cwt_sym2_32.gam2	WL_cwt_sym2_32_gam2	wavelet,cwt	6623	990	0.987712	0.000122046	0.987712
CO_AddNoise_1_gaussian.fitlina	CO_AddNoise_1_gaussian_fitlina	correlation,AMI,entropy	1272	727	-0.98771	0.000122046	0.98771
SY_LocalDistributions_5_par.mindiv	SY_LocalDistributions_5_par_mindiv	stationarity	2201	489	0.987701	0.000122046	0.987701
FC_LocalSimple_median5.stderr	FC_LocalSimple_median5_stderr	forecasting	3071	840	-0.987696	0.000122046	0.987696
PH_Walker_prop_11.sw_minrat	PH_Walker_prop_11_sw_minrat	trend	2590	814	-0.987686	0.000122046	0.987686
PH_Walker_runningvar_15_50.w_std	PH_Walker_runningvar_15_50_w_std	trend	2680	819	0.987675	0.000122046	0.987675
SY_LocalGlobal_unicg500.absmean	SY_LocalGlobal_absmean_unicg500	stationarity	771	508	-0.987669	0.000122046	0.987669
EN_SampEn_5_03.sampen1	EN_SampEn_5_03_sampen1	entropy,sampen	2727	824	-0.987665	0.000122046	0.987665
IN_AutoMutualInfoStats_40_kraskov1_4.fmmi	IN_AutoMutualInfoStats_40_kraskov1_4_fmmi	information,correlation,AMI	365	714	0.987659	0.000122046	0.987659
SB_MotifThree_quantile.hhhh	SB_MotifThree_quantile_hhhh	symbolic,motifs	3714	881	-0.987655	0.000122046	0.987655
EX_MovingThreshold_01_01.meankickf	EX_MovingThreshold_01_01_meankickf	outliers	3429	871	-0.98761	0.000122046	0.98761
SP_Summaries_fft_logdev.statav2_m	SP_Summaries_fft_logdev_statav2_m	spectral	4720	911	0.987582	0.000122046	0.987582
MD_hrv_classic.pnn40	MD_hrv_classic_pnn40	medical	7758	1051	-0.987567	0.000122046	0.987567
PH_Walker_biasprop_01_05.sw_distdiff	PH_Walker_biasprop_01_05_sw_distdiff	trend	2634	816	-0.987563	0.000122046	0.987563
MS_shannon_2t10_4.meanent	MS_shannon_2t10_4_meanent	entropy,mex	6922	687	-0.987519	0.000122046	0.987519
NL_embed_PCA_mi_10.min	NL_embed_PCA_mi_10_min	embedding,pca	6946	1007	-0.987501	0.000122046	0.987501
CO_glscf_2_5_4	CO_glscf_2_5_4	correlation,glscf	524	251	0.987499	0.000122046	0.987499
IN_AutoMutualInfoStats_40_gaussian.ami2	IN_AutoMutualInfoStats_40_gaussian_ami2	information,correlation,AMI	268	713	0.987456	0.000122046	0.987456
CO_AddNoise_1_quantiles_10.fitlina	CO_AddNoise_1_quantiles_10_fitlina	correlation,AMI,entropy	1159	721	-0.987453	0.000122046	0.987453
SB_MotifThree_quantile.acab	SB_MotifThree_quantile_acab	symbolic,motifs	3652	881	-0.987451	0.000122046	0.987451
IN_AutoMutualInfoStats_40_kraskov1_4.ami3	IN_AutoMutualInfoStats_40_kraskov1_4_ami3	information,correlation,AMI	324	714	0.987411	0.000122046	0.987411
PH_Walker_prop_05.res_ac1	PH_Walker_prop_05_res_ac1	trend	2557	812	0.987402	0.000122046	0.987402
SB_MotifThree_quantile.baca	SB_MotifThree_quantile_baca	symbolic,motifs	3666	881	-0.987395	0.000122046	0.987395
CO_HistogramAMI_std2_2.ami3	CO_HistogramAMI_std2_2_3	information,correlation,AMI	224	209	0.987394	0.000122046	0.987394
SB_MotifThree_quantile.babc	SB_MotifThree_quantile_babc	symbolic,motifs	3665	881	-0.987384	0.000122046	0.987384
PD_PeriodicityWang.th1	PD_PeriodicityWang_th0	periodicity,spline	1584	744	0.987367	0.000122046	0.987367
EN_SampEn_5_02.sampen1	EN_SampEn_5_02_sampen1	entropy,sampen	2720	823	-0.987361	0.000122046	0.987361
DN_RemovePoints_absfar_08.sumabsacfdiff	DN_RemovePoints_absfar_08_sumabsacfdiff	correlation,outliers	1725	756	0.987355	0.000122046	0.987355
PH_Walker_biasprop_01_05.w_std	PH_Walker_biasprop_01_05_w_std	trend	2620	816	0.987352	0.000122046	0.987352
NL_TISEAN_fnn_1_10_005.nHood2_5	NL_TISEAN_fnn_1_10_005_nHood2_5	nonlinear,dimension,tisean	4879	917	-0.987349	0.000122046	0.987349
FC_Surprise_T1_100_4_q_500.median	FC_Surprise_T1_100_4_q_500_median	information,symbolic	2291	782	-0.987326	0.000122046	0.987326
EN_Randomize_permute.ac4fexpa	EN_Randomize_permute_ac4fexpa	entropy,slow	2962	832	0.987319	0.000122046	0.987319
MF_FitSubsegments_arma_2_2_uniform_25_01.q_2_std	MF_FitSubsegments_arma_2_2_uniform_25_01_q_2_std	model,prediction	7154	1019	-0.987308	0.000122046	0.987308
WL_cwt_db3_32.gam1	WL_cwt_db3_32_gam1	wavelet,cwt	6596	989	-0.987298	0.000122046	0.987298
PH_Walker_momentum_2.w_ac1	PH_Walker_momentum_2_w_ac1	trend	2641	817	0.987293	0.000122046	0.987293
CO_HistogramAMI_std2_5.ami1	CO_HistogramAMI_std2_5_1	information,correlation,AMI	227	210	0.987279	0.000122046	0.987279
EN_SampEn_5_015.sampen1	EN_SampEn_5_015_sampen1	entropy,sampen	2713	822	-0.987277	0.000122046	0.987277
SY_TISEAN_nstat_z_5_1_3.stdeig	SY_TISEAN_nstat_z_5_1_3_stdeig	nonlinear,tisean,model,stationarity	4952	919	-0.987272	0.000122046	0.987272
ST_LocalExtrema_n50.meanmax	ST_LocalExtrema_n50_meanmax	distribution,stationarity	3381	869	-0.987269	0.000122046	0.987269
CO_HistogramAMI_std1_2.ami2	CO_HistogramAMI_std1_2_2	information,correlation,AMI	208	206	0.987268	0.000122046	0.987268
EN_SampEn_5_01.sampen1	EN_SampEn_5_01_sampen1	entropy,sampen	2706	821	-0.987256	0.000122046	0.987256
SP_Summaries_fft.fpoly2_r2	SP_Summaries_fft_fpoly2_r2	spectral	4556	910	-0.987255	0.000122046	0.987255
SP_Summaries_welch_rect.fpoly2_r2	SP_Summaries_welch_rect_fpoly2_r2	spectral	4432	909	-0.987255	0.000122046	0.987255
MF_FitSubsegments_arsbc_uniform_25_01.sbcs_max	MF_FitSubsegments_arsbc_uniform_25_01_sbcs_max	model,prediction,arfit	7107	1015	-0.98725	0.000122046	0.98725
CP_ML_StepDetect_l1pwc_005.rmsoff	CP_ML_StepDetect_l1pwc_005_rmsoff	stepdetection	7782	1053	0.987242	0.000122046	0.987242
NL_TISEAN_fnn_mi_10_005.nHood2_4	NL_TISEAN_fnn_mi_10_005_nHood2_4	nonlinear,dimension,tisean	4852	916	-0.98724	0.000122046	0.98724
PH_Walker_prop_09.sw_maxrat	PH_Walker_prop_09_sw_maxrat	trend	2571	813	0.987233	0.000122046	0.987233
IN_AutoMutualInfoStats_diff_20_gaussian.mami	IN_AutoMutualInfoStats_diff_20_gaussian_mami	information,correlation,AMI	397	715	-0.987226	0.000122046	0.987226
SB_MotifTwo_mean.uuuu	SB_MotifTwo_mean_uuuu	symbolic,motifs	3561	879	0.987192	0.000122046	0.987192
CO_CompareMinAMI_std2_2_80.mode	CO_CompareMinAMI_std2_2_80_mode	correlation,AMI	487	720	0.987191	0.000122046	0.987191
NL_TSTL_FractalDimensions_2_100_02_1_5_10_32_1_5.linfit_a	NL_TSTL_FractalDimensions_2_100_02_1_5_10_32_1_5_linfit_a	nonlinear,tstool,dimension,correlation,stochastic	5488	936	0.987187	0.000122046	0.987187
EN_MS_LZcomplexity_4_diff	EN_MS_LZcomplexity_4_diff	entropy,mex	1072	675	0.987183	0.000122046	0.987183
EN_MS_LZcomplexity_2	EN_MS_LZcomplexity_2	entropy,mex	1061	664	-0.98717	0.000122046	0.98717
PP_Iterate_diff.swms5_2_jump	PP_Iterate_diff_swms5_2_jump	preprocessing,raw,stationarity	6442	979	0.987117	0.000122046	0.987117
CO_HistogramAMI_std2_10.ami3	CO_HistogramAMI_std2_10_3	information,correlation,AMI	234	211	0.987117	0.000122046	0.987117
EN_MS_LZcomplexity_5_diff	EN_MS_LZcomplexity_5_diff	entropy,mex	1073	676	0.987116	0.000122046	0.987116
CO_AddNoise_1_std1_10.fitlinb	CO_AddNoise_1_std1_10_fitlinb	correlation,AMI,entropy	1236	725	0.987111	0.000122046	0.987111
EN_SampEn_5_005.sampen1	EN_SampEn_5_005_sampen1	entropy,sampen	2699	820	-0.987107	0.000122046	0.987107
SY_SpreadRandomLocal_ac2_100.meanac1	SY_SpreadRandomLocal_ac2_100_meanac1	stationarity	2084	476	0.987084	0.000122046	0.987084
MF_FitSubsegments_arsbc_rand_25_01.sbcs_max	MF_FitSubsegments_arsbc_rand_25_01_sbcs_max	model,prediction,arfit	7118	1016	-0.987067	0.000122046	0.987067
CO_TranslateShape_circle_35_pts.mean	CO_TranslateShape_circle_35_pts_mean	correlation	1813	764	0.987056	0.000122046	0.987056
SB_MotifTwo_mean.hhhh	SB_MotifTwo_mean_hhhh	symbolic,motifs	3562	879	-0.987048	0.000122046	0.987048
ST_LocalExtrema_n25.stdext	ST_LocalExtrema_n25_stdext	distribution,stationarity	3367	868	-0.987036	0.000122046	0.987036
EN_mse_1-10_2_015_diff1.sampen_s2	EN_mse_1-10_2_015_diff1_sampen_s2	entropy,sampen,controlen,mse	2765	828	0.987019	0.000122046	0.987019
CO_CompareMinAMI_std1_2_80.conv4	CO_CompareMinAMI_std1_2_80_conv4	correlation,AMI	456	717	0.987011	0.000122046	0.987011
CO_HistogramAMI_std2_5.ami3	CO_HistogramAMI_std2_5_3	information,correlation,AMI	229	210	0.987005	0.000122046	0.987005
MS_shannon_2t10_4.maxent	MS_shannon_2t10_4_maxent	entropy,mex	6919	687	-0.987005	0.000122046	0.987005
CO_Embed2_Basic_1.incircle_05	CO_Embed2_Basic_1_incircle_05	correlation	1549	742	0.98693	0.000122046	0.98693
PH_Walker_prop_05.sw_maxrat	PH_Walker_prop_05_sw_maxrat	trend	2551	812	0.986922	0.000122046	0.986922
SB_BinaryStats_iqr.pstretch1	SB_BinaryStats_iqr_pstretch1	distribution,stationarity	3488	877	-0.986913	0.000122046	0.986913
AC_nl_12345	AC_nl_12345	correlation,nonlinearautocorr	139	143	0.986912	0.000122046	0.986912
PH_Walker_momentum_5.sw_propcross	PH_Walker_momentum_5_sw_propcross	trend	2672	818	-0.986908	0.000122046	0.986908
SP_Summaries_fft_logdev.statav4_s	SP_Summaries_fft_logdev_statav4_s	spectral	4739	911	0.986906	0.000122046	0.986906
MF_hmm_07_3.Cov	MF_hmm_07_3_Cov	hmm,model	7723	1048	-0.986903	0.000122046	0.986903
NL_TSTL_LargestLyap_n1_01_001_3_1_4.ve_intercept	NL_TSTL_LargestLyap_n1_01_001_3_1_4_ve_intercept	nonlinear,tstool	5736	945	-0.986897	0.000122046	0.986897
NL_TSTL_FractalDimensions_2_100_02_1_5_10_32_1_5.meanDq	NL_TSTL_FractalDimensions_2_100_02_1_5_10_32_1_5_meanDq	nonlinear,tstool,dimension,correlation,stochastic	5484	936	-0.986897	0.000122046	0.986897
FC_Surprise_T1_50_3_q_500.median	FC_Surprise_T1_50_3_q_500_median	information,symbolic	2283	781	-0.986887	0.000122046	0.986887
PP_Compare_medianf3.statav10	PP_Compare_medianf3_statav10	preprocessing,raw,stationarity	6163	970	-0.986872	0.000122046	0.986872
NL_TSTL_LargestLyap_n1_01_001_3_1_4.vse_intercept	NL_TSTL_LargestLyap_n1_01_001_3_1_4_vse_intercept	nonlinear,tstool	5731	945	0.98686	0.000122046	0.98686
CO_HistogramAMI_quantiles_10.ami2	CO_HistogramAMI_quantiles_10_2	information,correlation,AMI	263	217	0.986856	0.000122046	0.986856
MD_hrv_classic.pnn30	MD_hrv_classic_pnn30	medical	7757	1051	-0.98683	0.000122046	0.98683
CO_HistogramAMI_std1_2.ami1	CO_HistogramAMI_std1_2_1	information,correlation,AMI	207	206	0.986825	0.000122046	0.986825
CO_RM_AMInformation_3	RM_ami_3	information,correlation,AMI	194	198	0.986823	0.000122046	0.986823
CO_HistogramAMI_even_10.ami3	CO_HistogramAMI_even_10_3	information,correlation,AMI	249	214	0.986814	0.000122046	0.986814
SB_MotifThree_diffquant.hhh	SB_MotifThree_diffquant_hhh	symbolic,motifs	3752	882	0.986811	0.000122046	0.986811
MF_GP_LocalPrediction_covSEiso_covNoise_10_3_20_frombefore.maxstderr_run	MF_GP_LocalPrediction_covSEiso_covNoise_10_3_20_frombefore_maxstderr_run	model,GaussianProcess	6541	986	0.986807	0.000122046	0.986807
EN_Randomize_dyndist.ac4fexpa	EN_Randomize_dyndist_ac4fexpa	entropy,slow	2899	831	0.986799	0.000122046	0.986799
NL_TSTL_LargestLyap_n1_01_001_3_1_4.expfit_a	NL_TSTL_LargestLyap_n1_01_001_3_1_4_expfit_a	nonlinear,tstool	5738	945	0.986792	0.000122046	0.986792
SP_Summaries_welch_rect.fpoly2csS_p3	SP_Summaries_welch_rect_fpoly2csS_p3	spectral	4430	909	0.98679	0.000122046	0.98679
SP_Summaries_fft.fpoly2csS_p3	SP_Summaries_fft_fpoly2csS_p3	spectral	4554	910	0.98679	0.000122046	0.98679
MF_GP_LocalPrediction_covSEiso_covNoise_10_3_20_frombefore.maxabserr_run	MF_GP_LocalPrediction_covSEiso_covNoise_10_3_20_frombefore_maxabserr_run	model,GaussianProcess	6542	986	0.986786	0.000122046	0.986786
MF_hmm_08_2.Cov	MF_hmm_08_2_Cov	hmm,model	7736	1049	-0.98676	0.000122046	0.98676
SY_SpreadRandomLocal_50_100.stdsampen1_015	SY_SpreadRandomLocal_50_100_stdsampen1_015	stationarity	2123	478	-0.986757	0.000122046	0.986757
EN_MS_LZcomplexity_6_diff	EN_MS_LZcomplexity_6_diff	entropy,mex	1074	677	0.986704	0.000122046	0.986704
CO_AddNoise_1_std1_10.fitlina	CO_AddNoise_1_std1_10_fitlina	correlation,AMI,entropy	1235	725	-0.986704	0.000122046	0.986704
SD_TSTL_surrogates_1_100_1_trev.stdsurr	SD_TSTL_surrogates_1_100_1_trev_stdsurr	nonlinear,tstool,correlation,surrogate	5840	955	0.9867	0.000122046	0.9867
FC_Surprise_T1_50_3_q_500.std	FC_Surprise_T1_50_3_q_500_std	information,symbolic	2286	781	0.9867	0.000122046	0.9867
MF_steps_ahead_ss_best_6.rmserr_4	MF_steps_ahead_ss_best_6_rmserr_4	model,prediction	7060	1013	-0.986679	0.000122046	0.986679
SB_MotifThree_quantile.bbba	SB_MotifThree_quantile_bbba	symbolic,motifs	3672	881	0.986646	0.000122046	0.986646
EN_Randomize_statdist.ac4fexpa	EN_Randomize_statdist_ac4fexpa	entropy,slow	2836	830	0.986641	0.000122046	0.986641
PP_Compare_medianf3.statav8	PP_Compare_medianf3_statav8	preprocessing,raw,stationarity	6162	970	-0.986638	0.000122046	0.986638
IN_AutoMutualInfoStats_40_gaussian.stdami	IN_AutoMutualInfoStats_40_gaussian_stdami	information,correlation,AMI	308	713	0.986611	0.000122046	0.986611
NW_VisibilityGraph_norm.evnlogL	NW_VisibilityGraph_norm_evnlogL	network,visibilityGraph,lengthdep	2062	773	0.986607	0.000122046	0.986607
ApEn1_02	ApEn1_02	entropy	913	554	-0.986573	0.000122046	0.986573
SB_MotifThree_quantile.hhh	SB_MotifThree_quantile_hhh	symbolic,motifs	3632	881	-0.98657	0.000122046	0.98657
PP_ModelFit_ar_2.rmserrrat_p2_20	PP_ModelFit_ar_2_rmserrrat_p2_20	preprocessing,trend	7002	1010	0.986556	0.000122046	0.986556
SB_MotifTwo_median.hhhh	SB_MotifTwo_median_hhhh	symbolic,motifs	3594	880	-0.98655	0.000122046	0.98655
PH_Walker_prop_09.sw_minrat	PH_Walker_prop_09_sw_minrat	trend	2570	813	0.986537	0.000122046	0.986537
ST_LocalExtrema_n100.minmax	ST_LocalExtrema_n100_minmax	distribution,stationarity	3400	870	-0.986521	0.000122046	0.986521
CO_AddNoise_1_kraskov1_4.fitexpa	CO_AddNoise_1_kraskov1_4_fitexpa	correlation,AMI,entropy	1306	729	0.986504	0.000122046	0.986504
SB_TransitionMatrix_51.symdiff	SB_TransitionMatrix_51_symdiff	symbolic,transitionmat	1373	734	-0.986503	0.000122046	0.986503
SP_Summaries_fft.stdlog	SP_Summaries_fft_stdlog	spectral	4532	910	0.986488	0.000122046	0.986488
SP_Summaries_welch_rect.stdlog	SP_Summaries_welch_rect_stdlog	spectral	4408	909	0.98648	0.000122046	0.98648
ST_LocalExtrema_l50.stdext	ST_LocalExtrema_l50_stdext	distribution,stationarity	3323	866	-0.986472	0.000122046	0.986472
CO_HistogramAMI_even_10.ami1	CO_HistogramAMI_even_10_1	information,correlation,AMI	247	214	0.986468	0.000122046	0.986468
MF_FitSubsegments_arma_2_2_uniform_25_01.q_2_min	MF_FitSubsegments_arma_2_2_uniform_25_01_q_2_min	model,prediction	7157	1019	0.986467	0.000122046	0.986467
NL_TSTL_acp_1_001_025_10_05.sacpf_6	NL_TSTL_acp_1_001_025_10_05_sacpf_6	nonlinear,correlation	5164	925	0.986438	0.000122046	0.986438
SB_BinaryStats_mean.stdstretch1	SB_BinaryStats_mean_stdstretch1	distribution,stationarity	3482	876	0.986438	0.000122046	0.986438
TSTL_localdensity_5_40_ac_fnnmar.ac1den	TSTL_localdensity_5_40_ac_fnnmar_ac1den	nonlinear,tstool	5507	938	0.986437	0.000122046	0.986437
CO_HistogramAMI_std1_10.ami2	CO_HistogramAMI_std1_10_2	information,correlation,AMI	218	208	0.986433	0.000122046	0.986433
SD_SurrogateTest_RP_99.ami_zscore	SD_SurrogateTest_RP_99_ami_zscore	surrogate,nonlinearity	7839	1062	0.986428	0.000122046	0.986428
SB_MotifTwo_mean.dudd	SB_MotifTwo_mean_dudd	symbolic,motifs	3550	879	-0.986425	0.000122046	0.986425
CO_HistogramAMI_std1_5.ami2	CO_HistogramAMI_std1_5_2	information,correlation,AMI	213	207	0.986415	0.000122046	0.986415
EN_MS_LZcomplexity_3_diff	EN_MS_LZcomplexity_3_diff	entropy,mex	1071	674	0.986406	0.000122046	0.986406
CP_l1pwc_sweep_lambda_0_005_095.corrsegerr	CP_l1pwc_sweep_lambda_0_005_095_corrsegerr	stepdetection	7811	1055	-0.986402	0.000122046	0.986402
NL_TSTL_LargestLyap_n1_01_001_3_mi_fnnmar.expfit_rmse	NL_TSTL_LargestLyap_n1_01_001_3_mi_fnnmar_expfit_rmse	nonlinear,tstool	5713	944	0.986402	0.000122046	0.986402
SP_Summaries_fft_logdev.peakpower_1	SP_Summaries_fft_logdev_peakpower_1	spectral	4649	911	0.986396	0.000122046	0.986396
FC_Surprise_T1_50_3_q_500.min	FC_Surprise_T1_50_3_q_500_min	information,symbolic	2280	781	-0.986384	0.000122046	0.986384
ST_LocalExtrema_l50.minabsmin	ST_LocalExtrema_l50_minabsmin	distribution,stationarity	3313	866	-0.986383	0.000122046	0.986383
SP_Summaries_fft.logiqr	SP_Summaries_fft_logiqr	spectral	4527	910	0.986382	0.000122046	0.986382
CO_AddNoise_1_even_10.meanch	CO_AddNoise_1_even_10_meanch	correlation,AMI,entropy	1183	723	-0.986379	0.000122046	0.986379
SP_Summaries_welch_rect.logiqr	SP_Summaries_welch_rect_logiqr	spectral	4403	909	0.986368	0.000122046	0.986368
PP_Compare_medianf3.swms10_1	PP_Compare_medianf3_swms10_1	preprocessing,raw,stationarity	6167	970	-0.986346	0.000122046	0.986346
ApEn1_01	ApEn1_01	entropy	912	553	-0.986339	0.000122046	0.986339
EN_MS_LZcomplexity_7_diff	EN_MS_LZcomplexity_7_diff	entropy,mex	1075	678	0.986335	0.000122046	0.986335
EN_SampEn_5_03.sampen5	EN_SampEn_5_03_sampen5	entropy,sampen	2731	824	-0.986332	0.000122046	0.986332
SP_Summaries_fft_logdev.area_5_1	SP_Summaries_fft_logdev_area_5_1	spectral	4740	911	0.986314	0.000122046	0.986314
PP_ModelFit_ar_2.rmserrrat_lf_02	PP_ModelFit_ar_2_rmserrrat_lf_02	preprocessing,trend	6992	1010	0.986313	0.000122046	0.986313
NL_TSTL_FractalDimensions_5_20_02_1_10_0_32_ac_fnnmar.linfit_a	NL_TSTL_FractalDimensions_5_20_02_1_10_0_32_ac_fnnmar_linfit_a	nonlinear,tstool,dimension,correlation,stochastic	5461	933	0.98629	0.000122046	0.98629
SB_MotifTwo_diff.hhhh	SB_MotifTwo_diff_hhhh	symbolic,motifs	3531	878	0.986283	0.000122046	0.986283
MF_GP_hyperparameters_covSEiso_covNoise_1_200_first.mabserr_std	MF_GP_hyperparameters_covSEiso_covNoise_1_200_first_mabserr_std	model,GaussianProcess	6488	982	0.986269	0.000122046	0.986269
WL_cwt_sym2_32.gam1	WL_cwt_sym2_32_gam1	wavelet,cwt	6622	990	-0.986222	0.000122046	0.986222
CO_RM_AMInformation_1	RM_ami_1	information,correlation,AMI	192	196	0.986218	0.000122046	0.986218
CO_TranslateShape_circle_25_pts.threes	CO_TranslateShape_circle_25_pts_threes	correlation	1802	763	-0.986215	0.000122046	0.986215
SP_Summaries_pgram_hamm.numPromPeaks_5	SP_Summaries_pgram_hamm_numPromPeaks_5	spectral	4265	908	0.9862	0.000122046	0.9862
CO_HistogramAMI_even_5.ami3	CO_HistogramAMI_even_5_3	information,correlation,AMI	244	213	0.986189	0.000122046	0.986189
MD_hrv_classic.pnn20	MD_hrv_classic_pnn20	medical	7756	1051	-0.986185	0.000122046	0.986185
IN_AutoMutualInfoStats_diff_20_gaussian.stdami	IN_AutoMutualInfoStats_diff_20_gaussian_stdami	information,correlation,AMI	398	715	-0.986142	0.000122046	0.986142
MF_GP_LocalPrediction_covSEiso_covNoise_5_3_10_beforeafter.meanerrbar	MF_GP_LocalPrediction_covSEiso_covNoise_5_3_10_beforeafter_meanerrbar	model,GaussianProcess	6528	985	-0.986134	0.000122046	0.986134
CO_HistogramAMI_std2_10.ami1	CO_HistogramAMI_std2_10_1	information,correlation,AMI	232	211	0.986129	0.000122046	0.986129
IN_AutoMutualInfoStats_40_kraskov1_4.ami1	IN_AutoMutualInfoStats_40_kraskov1_4_ami1	information,correlation,AMI	322	714	0.986121	0.000122046	0.986121
NL_embed_PCA_mi_10.perc_3	NL_embed_PCA_mi_10_perc_3	embedding,pca	6941	1007	0.986114	0.000122046	0.986114
FC_LocalSimple_lfittau.meanabserr	FC_LocalSimple_lfittau_meanabserr	forecasting	3129	846	-0.986081	0.000122046	0.986081
EN_mse_1-10_2_015_diff1.stdSampEn	EN_mse_1-10_2_015_diff1_stdSampEn	entropy,sampen,controlen,mse	2779	828	-0.986058	0.000122046	0.986058
SY_TISEAN_nstat_z_4_1_3.rangeeig	SY_TISEAN_nstat_z_4_1_3_rangeeig	nonlinear,tisean,model,stationarity	4924	918	-0.986049	0.000122046	0.986049
SP_Summaries_fft_logdev.area_2_2	SP_Summaries_fft_logdev_area_2_2	spectral	4718	911	-0.986018	0.000122046	0.986018
SD_SurrogateTest_RP_99.ami_p	SD_SurrogateTest_RP_99_ami_p	surrogate,nonlinearity	7838	1062	-0.985999	0.000122046	0.985999
CO_AddNoise_1_kraskov1_4.meanch	CO_AddNoise_1_kraskov1_4_meanch	correlation,AMI,entropy	1296	729	-0.98599	0.000122046	0.98599
CO_Embed2_Shapes_tau_circle_01.ac1	CO_Embed2_Shapes_tau_circle_01_ac1	correlation,embedding	1966	770	0.985983	0.000122046	0.985983
SB_MotifTwo_mean.hhh	SB_MotifTwo_mean_hhh	symbolic,motifs	3545	879	-0.985983	0.000122046	0.985983
SP_Summaries_fft_logdev.area_3_2	SP_Summaries_fft_logdev_area_3_2	spectral	4724	911	-0.985969	0.000122046	0.985969
IN_AutoMutualInfoStats_40_gaussian.ami3	IN_AutoMutualInfoStats_40_gaussian_ami3	information,correlation,AMI	269	713	0.98595	0.000122046	0.98595
CO_AddNoise_1_gaussian.fitexpa	CO_AddNoise_1_gaussian_fitexpa	correlation,AMI,entropy	1268	727	0.985943	0.000122046	0.985943
MS_shannon_2t10_3.meanent	MS_shannon_2t10_3_meanent	entropy,mex	6917	686	-0.985818	0.000122046	0.985818
MS_shannon_4_1t10.medent	MS_shannon_4_1t10_medent	entropy,mex	6936	690	-0.985815	0.000122046	0.985815
EN_MS_LZcomplexity_10_diff	EN_MS_LZcomplexity_10_diff	entropy,mex	1078	681	0.985803	0.000122046	0.985803
MS_shannon_3_1t10.minent	MS_shannon_3_1t10_minent	entropy,mex	6930	689	-0.985792	0.000122046	0.985792
PH_Walker_prop_05.w_propzcross	PH_Walker_prop_05_w_propzcross	trend	2546	812	-0.985781	0.000122046	0.985781
PP_ModelFit_ar_2.rmserrrat_d1	PP_ModelFit_ar_2_rmserrrat_d1	preprocessing,trend	6989	1010	0.985779	0.000122046	0.985779
CO_CompareMinAMI_std1_2_80.mode	CO_CompareMinAMI_std1_2_80_mode	correlation,AMI	454	717	0.985753	0.000122046	0.985753
SP_Summaries_fft.numPromPeaks_5	SP_Summaries_fft_numPromPeaks_5	spectral	4513	910	0.98574	0.000122046	0.98574
SP_Summaries_welch_rect.numPromPeaks_5	SP_Summaries_welch_rect_numPromPeaks_5	spectral	4389	909	0.98574	0.000122046	0.98574
IN_AutoMutualInfoStats_diff_20_gaussian.ami1	IN_AutoMutualInfoStats_diff_20_gaussian_ami1	information,correlation,AMI	377	715	-0.985723	0.000122046	0.985723
SB_MotifThree_quantile.aabb	SB_MotifThree_quantile_aabb	symbolic,motifs	3637	881	0.985713	0.000122046	0.985713
MF_arfit_1_8_sbc.fpe_1	MF_arfit_1_8_sbc_fpe_1	modelfit,arfit	6773	1002	-0.985703	0.000122046	0.985703
MF_CompareAR_1_10_all.bestaic	MF_CompareAR_1_10_all_bestaic	model	7377	1028	-0.985695	0.000122046	0.985695
CO_HistogramAMI_quantiles_10.ami3	CO_HistogramAMI_quantiles_10_3	information,correlation,AMI	264	217	0.985682	0.000122046	0.985682
FC_Surprise_dist_100_4_q_500.std	FC_Surprise_dist_100_4_q_500_std	information,symbolic	2262	778	0.985674	0.000122046	0.985674
SP_Summaries_fft_logdev.area_4_1	SP_Summaries_fft_logdev_area_4_1	spectral	4730	911	0.985667	0.000122046	0.985667
SY_PPtest_0_5_ar_t1.minBIC	SY_PPtest_0_5_ar_t1_minBIC	unitroot	7704	1043	-0.985665	0.000122046	0.985665
CO_HistogramAMI_quantiles_5.ami2	CO_HistogramAMI_quantiles_5_2	information,correlation,AMI	258	216	0.985649	0.000122046	0.985649
IN_AutoMutualInfoStats_40_gaussian.ami1	IN_AutoMutualInfoStats_40_gaussian_ami1	information,correlation,AMI	267	713	0.985645	0.000122046	0.985645
SD_TSTL_surrogates_mi_100_1_trev.stdsurr	SD_TSTL_surrogates_mi_100_1_trev_stdsurr	nonlinear,tstool,correlation,surrogate	5847	956	0.985645	0.000122046	0.985645
SP_Summaries_fft_logdev.maxProm	SP_Summaries_fft_logdev_maxProm	spectral	4639	911	0.985624	0.000122046	0.985624
SB_MotifTwo_mean.ddud	SB_MotifTwo_mean_ddud	symbolic,motifs	3548	879	-0.985604	0.000122046	0.985604
MF_GP_hyperparameters_covSEiso_covNoise_1_200_first.rmserr	MF_GP_hyperparameters_covSEiso_covNoise_1_200_first_rmserr	model,GaussianProcess	6487	982	0.985604	0.000122046	0.985604
EN_MS_LZcomplexity_8_diff	EN_MS_LZcomplexity_8_diff	entropy,mex	1076	679	0.985583	0.000122046	0.985583
EN_MS_LZcomplexity_2_diff	EN_MS_LZcomplexity_2_diff	entropy,mex	1070	673	0.985571	0.000122046	0.985571
NW_VisibilityGraph_norm.dpowerk_rmse	NW_VisibilityGraph_norm_dpowerk_rmse	network,visibilityGraph	2054	773	-0.985565	0.000122046	0.985565
CO_HistogramAMI_quantiles_10.ami1	CO_HistogramAMI_quantiles_10_1	information,correlation,AMI	262	217	0.985543	0.000122046	0.985543
SB_MotifTwo_mean.uuu	SB_MotifTwo_mean_uuu	symbolic,motifs	3544	879	0.985516	0.000122046	0.985516
EN_SampEn_5_03.meanchsampen	EN_SampEn_5_03_meanchsampen	entropy,sampen	2732	824	-0.985503	0.000122046	0.985503
SB_TransitionMatrix_31.sumdiagcov	SB_TransitionMatrix_31_sumdiagcov	symbolic,transitionmat	1345	732	0.985489	0.000122046	0.985489
CO_AddNoise_1_quantiles_10.meanch	CO_AddNoise_1_quantiles_10_meanch	correlation,AMI,entropy	1145	721	-0.985483	0.000122046	0.985483
CO_Embed2_Basic_1.parabdown05	CO_Embed2_Basic_1_parabdown05	correlation	1535	742	0.985471	0.000122046	0.985471
SB_TransitionMatrix_41.sumdiagcov	SB_TransitionMatrix_41_sumdiagcov	symbolic,transitionmat	1358	733	0.985463	0.000122046	0.985463
SB_MotifTwo_median.hhh	SB_MotifTwo_median_hhh	symbolic,motifs	3577	880	-0.985461	0.000122046	0.985461
PH_Walker_biasprop_01_05.sw_propcross	PH_Walker_biasprop_01_05_sw_propcross	trend	2632	816	-0.985452	0.000122046	0.985452
EN_mse_1-10_2_015_diff1.meanch	EN_mse_1-10_2_015_diff1_meanch	entropy,sampen,controlen,mse	2781	828	0.985451	0.000122046	0.985451
NL_TSTL_ReturnTime_10_1_1_n1_ac_8.hhist	NL_TSTL_ReturnTime_10_1_1_n1_ac_8_hhist	nonlinear,tstool	5754	946	-0.985446	0.000122046	0.985446
PH_Walker_momentum_2.w_ac2	PH_Walker_momentum_2_w_ac2	trend	2642	817	0.985446	0.000122046	0.985446
CO_AddNoise_1_even_10.pdec	CO_AddNoise_1_even_10_pdec	correlation,AMI,entropy	1182	723	0.98543	0.000122046	0.98543
MF_FitSubsegments_ar_2_uniform_25_01.a_1_max	MF_FitSubsegments_ar_2_uniform_25_01_a_1_max	model,prediction	7126	1017	-0.985429	0.000122046	0.985429
WL_dwtcoeff_sym2_5.stdd_l5	WL_dwtcoeff_sym2_5_stdd_l5	wavelet,dwt	6757	1001	0.9854	0.000122046	0.9854
CP_ML_StepDetect_l1pwc_02.rmsoff	CP_ML_StepDetect_l1pwc_02_rmsoff	stepdetection	7795	1054	0.985389	0.000122046	0.985389
CO_CompareMinAMI_std1_2_80.mean	CO_CompareMinAMI_std1_2_80_mean	correlation,AMI	451	717	0.985386	0.000122046	0.985386
SB_TransitionMatrix_51.sumdiagcov	SB_TransitionMatrix_51_sumdiagcov	symbolic,transitionmat	1375	734	0.985365	0.000122046	0.985365
CO_HistogramAMI_std1_10.ami3	CO_HistogramAMI_std1_10_3	information,correlation,AMI	219	208	0.985363	0.000122046	0.985363
SB_MotifTwo_diff.hhh	SB_MotifTwo_diff_hhh	symbolic,motifs	3514	878	0.985361	0.000122046	0.985361
SP_Summaries_fft_logdev.area_3_3	SP_Summaries_fft_logdev_area_3_3	spectral	4726	911	-0.985337	0.000122046	0.985337
PP_Compare_medianf3.swms5_2	PP_Compare_medianf3_swms5_2	preprocessing,raw,stationarity	6166	970	-0.985262	0.000122046	0.985262
CO_HistogramAMI_std1_5.ami1	CO_HistogramAMI_std1_5_1	information,correlation,AMI	212	207	0.985247	0.000122046	0.985247
CO_HistogramAMI_std1_2.ami3	CO_HistogramAMI_std1_2_3	information,correlation,AMI	209	206	0.985232	0.000122046	0.985232
SP_Summaries_fft_logdev.area_5_3	SP_Summaries_fft_logdev_area_5_3	spectral	4744	911	-0.985229	0.000122046	0.985229
MS_shannon_2t10_3.medent	MS_shannon_2t10_3_medent	entropy,mex	6916	686	-0.985226	0.000122046	0.985226
SB_MotifThree_diffquant.abab	SB_MotifThree_diffquant_abab	symbolic,motifs	3763	882	0.985203	0.000122046	0.985203
FC_LocalSimple_mean3.ac2	FC_LocalSimple_mean3_ac2	forecasting	3015	835	0.985181	0.000122046	0.985181
SP_Summaries_fft_logdev.area_4_4	SP_Summaries_fft_logdev_area_4_4	spectral	4736	911	-0.98518	0.000122046	0.98518
SB_TransitionMatrix_51.TD4	SB_TransitionMatrix_51_TD4	symbolic,transitionmat	1369	734	0.985175	0.000122046	0.985175
MS_shannon_2t10_3.maxent	MS_shannon_2t10_3_maxent	entropy,mex	6914	686	-0.98517	0.000122046	0.98517
SP_Summaries_pgram_hamm.logiqr	SP_Summaries_pgram_hamm_logiqr	spectral	4279	908	0.985156	0.000122046	0.985156
PH_Walker_biasprop_05_01.w_propzcross	PH_Walker_biasprop_05_01_w_propzcross	trend	2606	815	-0.985148	0.000122046	0.985148
CO_HistogramAMI_std1_10.ami1	CO_HistogramAMI_std1_10_1	information,correlation,AMI	217	208	0.985144	0.000122046	0.985144
SY_TISEAN_nstat_z_5_1_3.rangeeig	SY_TISEAN_nstat_z_5_1_3_rangeeig	nonlinear,tisean,model,stationarity	4951	919	-0.985143	0.000122046	0.985143
NW_VisibilityGraph_norm.kac1	NW_VisibilityGraph_norm_kac1	network,visibilityGraph	2064	773	0.985134	0.000122046	0.985134
SB_BinaryStats_diff.longstretch0	SB_BinaryStats_diff_longstretch0	distribution,stationarity	3467	875	0.985121	0.000122046	0.985121
EN_MS_LZcomplexity_9_diff	EN_MS_LZcomplexity_9_diff	entropy,mex	1077	680	0.985111	0.000122046	0.985111
NL_TISEAN_fnn_mi_10_005.nHood2_5	NL_TISEAN_fnn_mi_10_005_nHood2_5	nonlinear,dimension,tisean	4853	916	-0.985072	0.000122046	0.985072
CO_AddNoise_1_std1_10.meanch	CO_AddNoise_1_std1_10_meanch	correlation,AMI,entropy	1221	725	-0.985069	0.000122046	0.985069
PH_Walker_prop_05.sw_minrat	PH_Walker_prop_05_sw_minrat	trend	2550	812	0.985061	0.000122046	0.985061
SB_MotifThree_quantile.abbb	SB_MotifThree_quantile_abbb	symbolic,motifs	3646	881	0.985051	0.000122046	0.985051
SP_Summaries_fft_logdev.area_4_3	SP_Summaries_fft_logdev_area_4_3	spectral	4734	911	-0.985037	0.000122046	0.985037
MF_GP_LocalPrediction_covSEiso_covNoise_10_3_20_frombefore.meanabserr_run	MF_GP_LocalPrediction_covSEiso_covNoise_10_3_20_frombefore_meanabserr_run	model,GaussianProcess	6540	986	0.985037	0.000122046	0.985037
FC_Surprise_T1_100_5_udq_500.uq	FC_Surprise_T1_100_5_udq_500_uq	information,symbolic	2405	796	0.985034	0.000122046	0.985034
MF_StateSpace_n4sid_2_05_1.ac1diff	MF_StateSpace_n4sid_2_05_1_ac1diff	model	7316	1026	0.985009	0.000122046	0.985009
IN_AutoMutualInfoStats_diff_20_kraskov1_4.ami1	IN_AutoMutualInfoStats_diff_20_kraskov1_4_ami1	information,correlation,AMI	412	716	-0.985005	0.000122046	0.985005
CO_HistogramAMI_std1_5.ami3	CO_HistogramAMI_std1_5_3	information,correlation,AMI	214	207	0.984963	0.000122046	0.984963
ST_LocalExtrema_n50.minmax	ST_LocalExtrema_n50_minmax	distribution,stationarity	3378	869	-0.984962	0.000122046	0.984962
EN_SampEn_5_005.sampen3	EN_SampEn_5_005_sampen3	entropy,sampen	2701	820	0.984955	0.000122046	0.984955
SB_BinaryStretch_lseq0	SB_BinaryStretch_lseq0	binary	911	552	0.984939	0.000122046	0.984939
CO_CompareMinAMI_std1_2_80.median	CO_CompareMinAMI_std1_2_80_median	correlation,AMI	450	717	0.984935	0.000122046	0.984935
MS_shannon_4_1t10.minent	MS_shannon_4_1t10_minent	entropy,mex	6935	690	-0.984927	0.000122046	0.984927
EN_mse_1-10_2_015.meanch	EN_mse_1-10_2_015_meanch	entropy,sampen,mse	2763	827	0.984914	0.000122046	0.984914
SY_LocalDistributions_4_par.mindiv	SY_LocalDistributions_4_par_mindiv	stationarity	2197	488	0.984904	0.000122046	0.984904
PH_Walker_prop_05.sw_propcross	PH_Walker_prop_05_sw_propcross	trend	2552	812	-0.984903	0.000122046	0.984903
SB_BinaryStats_mean.longstretch0	SB_BinaryStats_mean_longstretch0	distribution,stationarity	3478	876	0.984884	0.000122046	0.984884
CO_HistogramAMI_quantiles_5.ami1	CO_HistogramAMI_quantiles_5_1	information,correlation,AMI	257	216	0.984881	0.000122046	0.984881
PP_Compare_medianf3.statav6	PP_Compare_medianf3_statav6	preprocessing,raw,stationarity	6161	970	-0.984879	0.000122046	0.984879
SB_MotifThree_diffquant.cbbc	SB_MotifThree_diffquant_cbbc	symbolic,motifs	3821	882	0.984867	0.000122046	0.984867
SB_MotifThree_quantile.aca	SB_MotifThree_quantile_aca	symbolic,motifs	3611	881	-0.984853	0.000122046	0.984853
CO_HistogramAMI_even_2.ami1	CO_HistogramAMI_even_2_1	information,correlation,AMI	237	212	0.984846	0.000122046	0.984846
SY_SlidingWindow_mom3_ent5_10	SY_SlidingWindow_mom3_ent5_10	stationarity	668	395	0.984834	0.000122046	0.984834
CO_HistogramAMI_even_2.ami2	CO_HistogramAMI_even_2_2	information,correlation,AMI	238	212	0.984806	0.000122046	0.984806
PP_ModelFit_ar_2.rmserrrat_peaks_08	PP_ModelFit_ar_2_rmserrrat_peaks_08	preprocessing,trend	6994	1010	0.984769	0.000122046	0.984769
WL_dwtcoeff_db3_5.stdd_l5	WL_dwtcoeff_db3_5_stdd_l5	wavelet,dwt	6737	1000	0.98471	0.000122046	0.98471
SC_FluctAnal_mag_2_dfa_50_2_logi.meanssr	SC_FluctAnal_mag_2_dfa_50_2_logi_meanssr	scaling	4206	905	0.984671	0.000122046	0.984671
SP_Summaries_fft_logdev.area_5_5	SP_Summaries_fft_logdev_area_5_5	spectral	4748	911	-0.984668	0.000122046	0.984668
NL_TISEAN_fnn_mi_10_005.nHood2_3	NL_TISEAN_fnn_mi_10_005_nHood2_3	nonlinear,dimension,tisean	4851	916	-0.984627	0.000122046	0.984627
FC_Surprise_dist_100_5_q_500.tstat	FC_Surprise_dist_100_5_q_500_tstat	information,symbolic	2271	779	-0.984579	0.000122046	0.984579
SP_Summaries_fft_logdev.peakPower_2	SP_Summaries_fft_logdev_peakPower_2	spectral	4643	911	0.984569	0.000122046	0.984569
EN_rpde_3_1.propNonZero	EN_rpde_3_1_propNonZero	entropy	860	511	0.984549	0.000122046	0.984549
SB_MotifThree_quantile.cac	SB_MotifThree_quantile_cac	symbolic,motifs	3625	881	-0.984524	0.000122046	0.984524
SP_Summaries_fft_logdev.fpoly2csS_p1	SP_Summaries_fft_logdev_fpoly2csS_p1	spectral	4676	911	-0.984477	0.000122046	0.984477
MF_StateSpace_n4sid_3_05_1.ac1diff	MF_StateSpace_n4sid_3_05_1_ac1diff	model	7361	1027	0.984461	0.000122046	0.984461
IN_AutoMutualInfoStats_40_kraskov1_4.ami4	IN_AutoMutualInfoStats_40_kraskov1_4_ami4	information,correlation,AMI	325	714	0.984452	0.000122046	0.984452
PH_Walker_prop_01.sw_meanabsdiff	PH_Walker_prop_01_sw_meanabsdiff	trend	2527	811	-0.984446	0.000122046	0.984446
SB_TransitionMatrix_21.sumdiagcov	SB_TransitionMatrix_21_sumdiagcov	symbolic,transitionmat	1340	731	0.984439	0.000122046	0.984439
SP_Summaries_pgram_hamm.linfitsemilog_all_sigrat	SP_Summaries_pgram_hamm_linfitsemilog_all_sigrat	spectral	4341	908	-0.984435	0.000122046	0.984435
AC_nl_016	AC_nl_016	correlation,nonlinearautocorr	180	184	0.984432	0.000122046	0.984432
PP_ModelFit_ar_2.rmserrrat_lf_02_d1	PP_ModelFit_ar_2_rmserrrat_lf_02_d1	preprocessing,trend	6993	1010	0.984428	0.000122046	0.984428
ST_LocalExtrema_n100.minmaxonminabsmin	ST_LocalExtrema_n100_minmaxonminabsmin	distribution,stationarity	3402	870	-0.9844	0.000122046	0.9844
FC_Surprise_T1_100_4_q_500.tstat	FC_Surprise_T1_100_4_q_500_tstat	information,symbolic	2295	782	-0.984394	0.000122046	0.984394
SP_Summaries_fft_logdev.area_5_4	SP_Summaries_fft_logdev_area_5_4	spectral	4746	911	-0.984392	0.000122046	0.984392
ST_LocalExtrema_n25.minabsmin	ST_LocalExtrema_n25_minabsmin	distribution,stationarity	3357	868	-0.984368	0.000122046	0.984368
SB_MotifThree_quantile.hh	SB_MotifThree_quantile_hh	symbolic,motifs	3604	881	-0.984342	0.000122046	0.984342
AC_nl_55	AC_nl_55	correlation,nonlinearautocorr	156	160	0.984338	0.000122046	0.984338
AC_nl_123456	AC_nl_123456	correlation,nonlinearautocorr	140	144	0.984288	0.000122046	0.984288
FC_Surprise_T2_20_2_udq_500.tstat	FC_Surprise_T2_20_2_udq_500_tstat	information,symbolic	2415	797	-0.984239	0.000122046	0.984239
MF_GP_LocalPrediction_covSEiso_covNoise_10_3_20_randomgap.meanerrbar	MF_GP_LocalPrediction_covSEiso_covNoise_10_3_20_randomgap_meanerrbar	model,GaussianProcess	6564	987	-0.984224	0.000122046	0.984224
NL_TSTL_FractalDimensions_2_100_02_1_5_10_32_1_5.rangeq	NL_TSTL_FractalDimensions_2_100_02_1_5_10_32_1_5_rangeq	nonlinear,tstool,dimension,correlation,stochastic	5486	936	0.984213	0.000122046	0.984213
SB_MotifThree_quantile.accc	SB_MotifThree_quantile_accc	symbolic,motifs	3659	881	-0.984211	0.000122046	0.984211
AC_4	AC_4	correlation	96	95	0.984189	0.000122046	0.984189
FC_LocalSimple_lfittau.stderr	FC_LocalSimple_lfittau_stderr	forecasting	3130	846	-0.984177	0.000122046	0.984177
EN_SampEn_5_02_diff1.sampen4	EN_SampEn_5_02_diff1_sampen4	entropy,sampen,controlen	2744	826	-0.984175	0.000122046	0.984175
SP_Summaries_welch_rect.mom3	SP_Summaries_welch_rect_mom3	spectral	4412	909	0.984161	0.000122046	0.984161
SP_Summaries_fft.mom3	SP_Summaries_fft_mom3	spectral	4536	910	0.984159	0.000122046	0.984159
SY_SlidingWindow_mom3_sampen10_10	SY_SlidingWindow_mom3_sampen10_10	stationarity	662	389	0.984156	0.000122046	0.984156
CO_HistogramAMI_std2_10.ami4	CO_HistogramAMI_std2_10_4	information,correlation,AMI	235	211	0.984129	0.000122046	0.984129
FC_LocalSimple_mean2.ac1	FC_LocalSimple_mean2_ac1	forecasting	3004	834	0.984122	0.000122046	0.984122
SP_Summaries_pgram_hamm.stdlog	SP_Summaries_pgram_hamm_stdlog	spectral	4284	908	0.984107	0.000122046	0.984107
CO_AddNoise_1_even_10.fitexpa	CO_AddNoise_1_even_10_fitexpa	correlation,AMI,entropy	1193	723	0.984105	0.000122046	0.984105
EN_SampEn_5_02.sampen4	EN_SampEn_5_02_sampen4	entropy,sampen	2723	823	-0.984094	0.000122046	0.984094
EN_SampEn_5_005.sampen2	EN_SampEn_5_005_sampen2	entropy,sampen	2700	820	-0.984065	0.000122046	0.984065
SY_SpreadRandomLocal_ac2_100.meanstd	SY_SpreadRandomLocal_ac2_100_meanstd	stationarity	2080	476	-0.98405	0.000122046	0.98405
PH_Walker_prop_09.sw_ansarib_pval	PH_Walker_prop_09_sw_ansarib_pval	trend	2573	813	0.984048	0.000122046	0.984048
SY_SlidingWindow_ent_ent10_10	SY_SlidingWindow_ent_ent10_10	stationarity	625	352	0.984043	0.000122046	0.984043
SB_TransitionMatrix_51.TD2	SB_TransitionMatrix_51_TD2	symbolic,transitionmat	1367	734	0.984032	0.000122046	0.984032
SP_Summaries_pgram_hamm.fpoly2csS_p3	SP_Summaries_pgram_hamm_fpoly2csS_p3	spectral	4306	908	0.984028	0.000122046	0.984028
PP_ModelFit_ar_2.rmserrrat_d3	PP_ModelFit_ar_2_rmserrrat_d3	preprocessing,trend	6991	1010	0.984024	0.000122046	0.984024
PP_Compare_medianf3.swss10_2	PP_Compare_medianf3_swss10_2	preprocessing,raw,stationarity	6173	970	-0.983987	0.000122046	0.983987
CO_RM_AMInformation_4	RM_ami_4	information,correlation,AMI	195	199	0.983974	0.000122046	0.983974
SB_MotifThree_diffquant.hh	SB_MotifThree_diffquant_hh	symbolic,motifs	3724	882	0.98397	0.000122046	0.98397
SB_TransitionpAlphabet_40_1.trcov_jump	SB_TransitionpAlphabet_40_1_trcov_jump	symbolic,transitionmat	1463	739	-0.983946	0.000122046	0.983946
NL_TSTL_FractalDimensions_2_100_02_1_5_10_32_1_5.meanq	NL_TSTL_FractalDimensions_2_100_02_1_5_10_32_1_5_meanq	nonlinear,tstool,dimension,correlation,stochastic	5487	936	-0.983942	0.000122046	0.983942
IN_AutoMutualInfoStats_40_kraskov1_4.pcrossmedian	IN_AutoMutualInfoStats_40_kraskov1_4_pcrossmedian	information,correlation,AMI	373	714	-0.983932	0.000122046	0.983932
SB_MotifTwo_mean.hh	SB_MotifTwo_mean_hh	symbolic,motifs	3536	879	-0.98384	0.000122046	0.98384
PP_Compare_medianf3.swms5_1	PP_Compare_medianf3_swms5_1	preprocessing,raw,stationarity	6165	970	-0.983835	0.000122046	0.983835
CO_glscf_1_1_5	CO_glscf_1_1_5	correlation,glscf	495	222	0.983809	0.000122046	0.983809
ApEn2_02	ApEn2_02	entropy	915	556	-0.983758	0.000122046	0.983758
CO_HistogramAMI_quantiles_5.ami3	CO_HistogramAMI_quantiles_5_3	information,correlation,AMI	259	216	0.983755	0.000122046	0.983755
FC_Surprise_T1_100_4_udq_500.mean	FC_Surprise_T1_100_4_udq_500_mean	information,symbolic	2394	795	0.983752	0.000122046	0.983752
CO_HistogramAMI_even_10.ami4	CO_HistogramAMI_even_10_4	information,correlation,AMI	250	214	0.983731	0.000122046	0.983731
FC_Surprise_dist_10_tau_m2quad_500.lq	FC_Surprise_dist_10_tau_m2quad_500_lq	information,symbolic	2460	803	-0.983686	0.000122046	0.983686
FC_Surprise_T2_100_5_q_500.mean	FC_Surprise_T2_100_5_q_500_mean	information,symbolic	2330	787	0.983616	0.000122046	0.983616
SB_BinaryStats_mean.meanstretch1	SB_BinaryStats_mean_meanstretch1	distribution,stationarity	3479	876	0.983613	0.000122046	0.983613
WL_cwt_sym2_32.meanabsC	WL_cwt_sym2_32_meanabsC	wavelet,cwt	6612	990	0.983589	0.000122046	0.983589
EX_MovingThreshold_1_01.meankickf	EX_MovingThreshold_1_01_meankickf	outliers	3451	873	-0.983566	0.000122046	0.983566
PH_Walker_momentum_2.sw_minrat	PH_Walker_momentum_2_sw_minrat	trend	2650	817	0.983558	0.000122046	0.983558
FC_Surprise_T2_20_2_q_500.tstat	FC_Surprise_T2_20_2_q_500_tstat	information,symbolic	2311	784	0.983538	0.000122046	0.983538
PP_ModelFit_ar_2.rmserrrat_d2	PP_ModelFit_ar_2_rmserrrat_d2	preprocessing,trend	6990	1010	0.983424	0.000122046	0.983424
NL_TSTL_acp_1_001_025_10_05.sacpf_5	NL_TSTL_acp_1_001_025_10_05_sacpf_5	nonlinear,correlation	5160	925	0.9834	0.000122046	0.9834
FC_Surprise_dist_100_5_q_500.max	FC_Surprise_dist_100_5_q_500_max	information,symbolic	2265	779	0.983398	0.000122046	0.983398
SB_TransitionMatrix_41.symdiff	SB_TransitionMatrix_41_symdiff	symbolic,transitionmat	1356	733	-0.983391	0.000122046	0.983391
FC_Surprise_T2_100_5_q_500.min	FC_Surprise_T2_100_5_q_500_min	information,symbolic	2328	787	-0.983388	0.000122046	0.983388
CO_HistogramAMI_std2_5.ami4	CO_HistogramAMI_std2_5_4	information,correlation,AMI	230	210	0.983362	0.000122046	0.983362
SB_MotifThree_quantile.ccca	SB_MotifThree_quantile_ccca	symbolic,motifs	3711	881	-0.983333	0.000122046	0.983333
MF_arfit_1_8_sbc.meantauerr	MF_arfit_1_8_sbc_meantauerr	modelfit,arfit	6805	1002	0.983317	0.000122046	0.983317
SP_Summaries_fft_logdev.area_3_1	SP_Summaries_fft_logdev_area_3_1	spectral	4722	911	0.983261	0.000122046	0.983261
SP_Summaries_fft_logdev.logarea_2_1	SP_Summaries_fft_logdev_logarea_2_1	spectral	4717	911	0.983261	0.000122046	0.983261
SP_Summaries_fft.peakPower_2	SP_Summaries_fft_peakPower_2	spectral	4519	910	0.983233	0.000122046	0.983233
SB_MotifTwo_median.hh	SB_MotifTwo_median_hh	symbolic,motifs	3568	880	-0.983233	0.000122046	0.983233
CO_HistogramAMI_quantiles_2.ami1	CO_HistogramAMI_quantiles_2_1	information,correlation,AMI	252	215	0.983233	0.000122046	0.983233
SP_Summaries_welch_rect.peakPower_2	SP_Summaries_welch_rect_peakPower_2	spectral	4395	909	0.983231	0.000122046	0.983231
PP_ModelFit_ar_2.rmserrrat_peaks_08_d1	PP_ModelFit_ar_2_rmserrrat_peaks_08_d1	preprocessing,trend	6995	1010	0.983221	0.000122046	0.983221
SP_Summaries_pgram_hamm.mom3	SP_Summaries_pgram_hamm_mom3	spectral	4288	908	0.983217	0.000122046	0.983217
MF_GP_hyperparameters_covSEiso_covPeriodic_covNoise_1_200_resample.mlikelihood	MF_GP_hyperparameters_covSEiso_covPeriodic_covNoise_1_200_resample_mlikelihood	model,GaussianProcess	6475	981	0.983211	0.000122046	0.983211
MD_hrv_classic.pnn10	MD_hrv_classic_pnn10	medical	7755	1051	-0.983181	0.000122046	0.983181
WL_coeffs_db3_5.mean_coeff	WL_coeffs_db3_5_mean_coeff	wavelet	6696	997	0.983169	0.000122046	0.983169
MF_GP_hyperparameters_covSEiso_covNoise_1_200_resample.mlikelihood	MF_GP_hyperparameters_covSEiso_covNoise_1_200_resample_mlikelihood	model,GaussianProcess	6462	980	0.983165	0.000122046	0.983165
MF_arfit_1_8_sbc.minexctn	MF_arfit_1_8_sbc_minexctn	modelfit,arfit	6807	1002	-0.98316	0.000122046	0.98316
CO_glscf_1_10_4	CO_glscf_1_10_4	correlation,glscf	512	239	0.98315	0.000122046	0.98315
CO_AddNoise_1_quantiles_10.fitexpa	CO_AddNoise_1_quantiles_10_fitexpa	correlation,AMI,entropy	1155	721	0.983116	0.000122046	0.983116
CO_glscf_1_2_5	CO_glscf_1_2_5	correlation,glscf	501	228	0.983087	0.000122046	0.983087
CO_HistogramAMI_quantiles_2.ami2	CO_HistogramAMI_quantiles_2_2	information,correlation,AMI	253	215	0.983081	0.000122046	0.983081
SB_TransitionMatrix_31.mineig	SB_TransitionMatrix_31_mineig	symbolic,transitionmat	1348	732	0.983061	0.000122046	0.983061
SB_MotifTwo_diff.hh	SB_MotifTwo_diff_hh	symbolic,motifs	3505	878	0.983054	0.000122046	0.983054
SB_MotifThree_diffquant.aba	SB_MotifThree_diffquant_aba	symbolic,motifs	3728	882	0.98305	0.000122046	0.98305
SY_LocalDistributions_4_each.mediandiv	SY_LocalDistributions_4_each_mediandiv	stationarity	2208	492	0.98304	0.000122046	0.98304
SB_MotifThree_diffquant.baba	SB_MotifThree_diffquant_baba	symbolic,motifs	3783	882	0.983027	0.000122046	0.983027
NL_TSTL_ReturnTime_10_1_1_n1_ac_8.rangecgdist	NL_TSTL_ReturnTime_10_1_1_n1_ac_8_rangecgdist	nonlinear,tstool	5756	946	0.983026	0.000122046	0.983026
FC_Surprise_T1_50_tau_m2quad_500.mean	FC_Surprise_T1_50_tau_m2quad_500_mean	information,symbolic	2496	808	-0.983008	0.000122046	0.983008
FC_LoopLocalSimple_mean.stderr_chn	FC_LoopLocalSimple_mean_stderr_chn	forecasting	3038	838	0.982958	0.000122046	0.982958
SP_Summaries_fft_logdev.area_4_2	SP_Summaries_fft_logdev_area_4_2	spectral	4732	911	-0.982942	0.000122046	0.982942
PD_PeriodicityWang.th2	PD_PeriodicityWang_th0.01	periodicity,spline	1585	744	0.982936	0.000122046	0.982936
PH_Walker_prop_05.w_ac1	PH_Walker_prop_05_w_ac1	trend	2541	812	0.982924	0.000122046	0.982924
SY_SpreadRandomLocal_50_100.stdstd	SY_SpreadRandomLocal_50_100_stdstd	stationarity	2120	478	0.982881	0.000122046	0.982881
FC_Surprise_T1_20_tau_m2quad_500.tstat	FC_Surprise_T1_20_tau_m2quad_500_tstat	information,symbolic	2493	807	0.982879	0.000122046	0.982879
PP_Compare_medianf3.swss10_1	PP_Compare_medianf3_swss10_1	preprocessing,raw,stationarity	6172	970	-0.982831	0.000122046	0.982831
CO_HistogramAMI_std2_2.ami4	CO_HistogramAMI_std2_2_4	information,correlation,AMI	225	209	0.982808	0.000122046	0.982808
CO_Embed2_Dist_tau.d_ac1	CO_Embed2_Dist_tau_d_ac1	correlation,embedding	1954	769	-0.982801	0.000122046	0.982801
CO_CompareMinAMI_even_2_80.conv4	CO_CompareMinAMI_even_2_80_conv4	correlation,AMI	478	719	0.982788	0.000122046	0.982788
FC_Surprise_T1_50_3_udq_500.mean	FC_Surprise_T1_50_3_udq_500_mean	information,symbolic	2386	794	0.982695	0.000122046	0.982695
NL_TSTL_LargestLyap_n1_01_001_3_1_4.vse_gradient	NL_TSTL_LargestLyap_n1_01_001_3_1_4_vse_gradient	nonlinear,tstool	5730	945	-0.982681	0.000122046	0.982681
CO_glscf_2_2_5	CO_glscf_2_2_5	correlation,glscf	519	246	0.982674	0.000122046	0.982674
MF_GP_hyperparameters_covSEiso_covNoise_1_50_random_i.std_S_data	MF_GP_hyperparameters_covSEiso_covNoise_1_50_random_i_std_S_data	model,GaussianProcess	6517	984	0.982674	0.000122046	0.982674
SC_FluctAnal_2_dfa_50_3_logi.linfitint	SC_FluctAnal_2_dfa_50_3_logi_linfitint	scaling	4125	902	-0.982647	0.000122046	0.982647
MD_polvar_1_5	MD_polvar_1_5	medical,symbolic	1085	694	0.982646	0.000122046	0.982646
CO_Embed2_AngleTau_50.max_thetaac1	CO_Embed2_AngleTau_50_max_thetaac1	correlation,embedding	1944	768	-0.982645	0.000122046	0.982645
MF_steps_ahead_ss_best_6.rmserr_5	MF_steps_ahead_ss_best_6_rmserr_5	model,prediction	7063	1013	-0.982631	0.000122046	0.982631
SB_MotifThree_quantile.bc	SB_MotifThree_quantile_bc	symbolic,motifs	3600	881	-0.982628	0.000122046	0.982628
WL_cwt_db3_32.meanabsC	WL_cwt_db3_32_meanabsC	wavelet,cwt	6586	989	0.982626	0.000122046	0.982626
PH_Walker_momentum_5.sw_minrat	PH_Walker_momentum_5_sw_minrat	trend	2670	818	0.982616	0.000122046	0.982616
CO_Embed2_Basic_1.incircle_2	CO_Embed2_Basic_1_incircle_2	correlation	1551	742	0.982606	0.000122046	0.982606
MS_shannon_3_1t10.medent	MS_shannon_3_1t10_medent	entropy,mex	6931	689	-0.982588	0.000122046	0.982588
SB_TransitionpAlphabet_40_1.trcovfexp_rmse	SB_TransitionpAlphabet_40_1_trcovfexp_rmse	symbolic,transitionmat	1467	739	0.982542	0.000122046	0.982542
NL_crptool_fnn_10_2_1.fnn5	NL_crptool_fnn_10_2_1_fnn5	nonlinear,dimension,crptool	4791	914	-0.982483	0.000122046	0.982483
MF_GP_hyperparameters_covSEiso_covPeriodic_covNoise_1_200_first.mabserr_std	MF_GP_hyperparameters_covSEiso_covPeriodic_covNoise_1_200_first_mabserr_std	model,GaussianProcess	6501	983	0.982473	0.000122046	0.982473
SY_LocalDistributions_4_par.mediandiv	SY_LocalDistributions_4_par_mediandiv	stationarity	2196	488	0.982434	0.000122046	0.982434
DN_SimpleFit_sin3.rmse	DN_SimpleFit_sin3_rmse	model,gof	3881	890	-0.98243	0.000122046	0.98243
SP_Summaries_fft_logdev.w25_75	SP_Summaries_fft_logdev_w25_75	spectral	4675	911	-0.982422	0.000122046	0.982422
SP_Summaries_fft_logdev.wmax_75	SP_Summaries_fft_logdev_wmax_75	spectral	4670	911	-0.982419	0.000122046	0.982419
CO_Embed2_AngleTau_50.mean_thetaac1	CO_Embed2_AngleTau_50_mean_thetaac1	correlation,embedding	1943	768	-0.982374	0.000122046	0.982374
SB_TransitionpAlphabet_40_1.trcovfexp_a	SB_TransitionpAlphabet_40_1_trcovfexp_a	symbolic,transitionmat	1464	739	0.982339	0.000122046	0.982339
MF_GP_hyperparameters_covSEiso_covNoise_1_50_random_i.h2	MF_GP_hyperparameters_covSEiso_covNoise_1_50_random_i_h2	model,GaussianProcess	6509	984	0.982314	0.000122046	0.982314
WL_dwtcoeff_sym2_5.stdd_l4	WL_dwtcoeff_sym2_5_stdd_l4	wavelet,dwt	6753	1001	0.982309	0.000122046	0.982309
MS_shannon_4_1t10.meanent	MS_shannon_4_1t10_meanent	entropy,mex	6937	690	-0.982305	0.000122046	0.982305
SB_TransitionMatrix_41.TD2	SB_TransitionMatrix_41_TD2	symbolic,transitionmat	1351	733	0.982291	0.000122046	0.982291
PP_Iterate_diff.statav5_trend	PP_Iterate_diff_statav5_trend	preprocessing,raw,stationarity	6438	979	-0.982289	0.000122046	0.982289
FC_Surprise_T1_100_4_q_500.std	FC_Surprise_T1_100_4_q_500_std	information,symbolic	2294	782	0.982285	0.000122046	0.982285
NL_TSTL_FractalDimensions_2_100_02_1_5_10_32_1_5.maxq	NL_TSTL_FractalDimensions_2_100_02_1_5_10_32_1_5_maxq	nonlinear,tstool,dimension,correlation,stochastic	5485	936	-0.982276	0.000122046	0.982276
SB_MotifThree_quantile.cb	SB_MotifThree_quantile_cb	symbolic,motifs	3602	881	-0.982237	0.000122046	0.982237
SB_TransitionpAlphabet_40_1.trfexp_rmse	SB_TransitionpAlphabet_40_1_trfexp_rmse	symbolic,transitionmat	1458	739	0.982228	0.000122046	0.982228
PH_Walker_prop_11.sw_ansarib_pval	PH_Walker_prop_11_sw_ansarib_pval	trend	2593	814	0.982223	0.000122046	0.982223
SY_LocalDistributions_4_each.meandiv	SY_LocalDistributions_4_each_meandiv	stationarity	2207	492	0.982222	0.000122046	0.982222
MF_GP_hyperparameters_covSEiso_covPeriodic_covNoise_1_200_resample.logh3	MF_GP_hyperparameters_covSEiso_covPeriodic_covNoise_1_200_resample_logh3	model,GaussianProcess	6472	981	0.982207	0.000122046	0.982207
CO_HistogramAMI_quantiles_10.ami4	CO_HistogramAMI_quantiles_10_4	information,correlation,AMI	265	217	0.982183	0.000122046	0.982183
SP_Summaries_pgram_hamm.wmax_90	SP_Summaries_pgram_hamm_wmax_90	spectral	4299	908	-0.982178	0.000122046	0.982178
MF_StateSpace_n4sid_1_05_1.ac1diff	MF_StateSpace_n4sid_1_05_1_ac1diff	model	7278	1025	0.982161	0.000122046	0.982161
MD_polvar_1_4	MD_polvar_1_4	medical,symbolic	1088	697	0.982149	0.000122046	0.982149
FC_LocalSimple_median7.meanabserr	FC_LocalSimple_median7_meanabserr	forecasting	3080	841	-0.982147	0.000122046	0.982147
FC_Surprise_T1_50_3_udq_500.median	FC_Surprise_T1_50_3_udq_500_median	information,symbolic	2387	794	0.982145	0.000122046	0.982145
NL_crptool_fnn_10_2_1.fnn4	NL_crptool_fnn_10_2_1_fnn4	nonlinear,dimension,crptool	4790	914	-0.982143	0.000122046	0.982143
SB_TransitionMatrix_41.TD3	SB_TransitionMatrix_41_TD3	symbolic,transitionmat	1352	733	0.982143	0.000122046	0.982143
MF_GP_hyperparameters_covSEiso_covPeriodic_covNoise_1_200_first.rmserr	MF_GP_hyperparameters_covSEiso_covPeriodic_covNoise_1_200_first_rmserr	model,GaussianProcess	6500	983	0.982125	0.000122046	0.982125
EX_MovingThreshold_01_002.mediankickf	EX_MovingThreshold_01_002_mediankickf	outliers	3441	872	-0.982089	0.000122046	0.982089
SC_FluctAnal_mag_2_dfa_50_2_logi.se1	SC_FluctAnal_mag_2_dfa_50_2_logi_se1	scaling	4199	905	0.982087	0.000122046	0.982087
SC_FluctAnal_mag_2_dfa_50_2_logi.se2	SC_FluctAnal_mag_2_dfa_50_2_logi_se2	scaling	4200	905	0.982087	0.000122046	0.982087
NL_crptool_fnn_10_2_1.fnn3	NL_crptool_fnn_10_2_1_fnn3	nonlinear,dimension,crptool	4789	914	-0.982069	0.000122046	0.982069
SB_MotifThree_quantile.bbaa	SB_MotifThree_quantile_bbaa	symbolic,motifs	3669	881	0.982067	0.000122046	0.982067
PH_Walker_momentum_5.sw_maxrat	PH_Walker_momentum_5_sw_maxrat	trend	2671	818	0.982063	0.000122046	0.982063
MD_polvar_1_6	MD_polvar_1_6	medical,symbolic	1091	700	0.982006	0.000122046	0.982006
MD_hrv_classic.hf	MD_hrv_classic_hf	medical	7762	1051	0.981984	0.000122046	0.981984
CO_HistogramAMI_even_5.ami4	CO_HistogramAMI_even_5_4	information,correlation,AMI	245	213	0.981972	0.000122046	0.981972
CP_ML_StepDetect_l1pwc_10.nsegments	CP_ML_StepDetect_l1pwc_10_nsegments	stepdetection	7768	1052	0.981968	0.000122046	0.981968
CO_HistogramAMI_even_2.ami3	CO_HistogramAMI_even_2_3	information,correlation,AMI	239	212	0.981933	0.000122046	0.981933
CO_TranslateShape_circle_15_pts.std	CO_TranslateShape_circle_15_pts_std	correlation	1782	762	-0.981928	0.000122046	0.981928
FC_Surprise_T1_10_1_m2quad_500.tstat	FC_Surprise_T1_10_1_m2quad_500_tstat	information,symbolic	2477	805	0.981921	0.000122046	0.981921
FC_Surprise_T1_100_4_udq_500.uq	FC_Surprise_T1_100_4_udq_500_uq	information,symbolic	2397	795	0.981914	0.000122046	0.981914
WL_cwt_sym2_32.min_ssc	WL_cwt_sym2_32_min_ssc	wavelet,cwt	6627	990	-0.981909	0.000122046	0.981909
SB_MotifThree_quantile.bb	SB_MotifThree_quantile_bb	symbolic,motifs	3599	881	0.981888	0.000122046	0.981888
SY_LocalDistributions_4_par.meandiv	SY_LocalDistributions_4_par_meandiv	stationarity	2195	488	0.981814	0.000122046	0.981814
IN_AutoMutualInfoStats_40_kraskov1_4.pminima	IN_AutoMutualInfoStats_40_kraskov1_4_pminima	information,correlation,AMI	369	714	-0.981812	0.000122046	0.981812
CO_HistogramAMI_std1_10.ami4	CO_HistogramAMI_std1_10_4	information,correlation,AMI	220	208	0.981807	0.000122046	0.981807
FC_Surprise_T1_100_5_udq_500.mean	FC_Surprise_T1_100_5_udq_500_mean	information,symbolic	2402	796	0.981784	0.000122046	0.981784
MF_steps_ahead_ar_2_6.stddiffrms	MF_steps_ahead_ar_2_6_stddiffrms	model,prediction	7026	1011	0.981759	0.000122046	0.981759
SC_FluctAnal_sign_2_dfa_50_2_logi.ssr	SC_FluctAnal_sign_2_dfa_50_2_logi_ssr	scaling	4225	906	0.981741	0.000122046	0.981741
MF_GP_LocalPrediction_covSEiso_covNoise_10_3_20_frombefore.meanlogh3	MF_GP_LocalPrediction_covSEiso_covNoise_10_3_20_frombefore_meanlogh3	model,GaussianProcess	6552	986	-0.981732	0.000122046	0.981732
SB_TransitionMatrix_51.stdeig	SB_TransitionMatrix_51_stdeig	symbolic,transitionmat	1376	734	-0.981698	0.000122046	0.981698
SP_Summaries_welch_rect.wmax_90	SP_Summaries_welch_rect_wmax_90	spectral	4423	909	-0.981652	0.000122046	0.981652
SP_Summaries_fft.wmax_90	SP_Summaries_fft_wmax_90	spectral	4547	910	-0.981645	0.000122046	0.981645
NW_VisibilityGraph_horiz.maxonmedian	NW_VisibilityGraph_horiz_maxonmedian	network,visibilityGraph	2003	772	-0.981641	0.000122046	0.981641
PP_Compare_medianf3.statav4	PP_Compare_medianf3_statav4	preprocessing,raw,stationarity	6160	970	-0.981624	0.000122046	0.981624
MF_steps_ahead_ar_best_6.rmserr_4	MF_steps_ahead_ar_best_6_rmserr_4	model,prediction,arfit	7037	1012	-0.981518	0.000122046	0.981518
FC_LocalSimple_meantau.meanabserr	FC_LocalSimple_meantau_meanabserr	forecasting	3029	837	-0.981514	0.000122046	0.981514
SY_SlidingWindow_mom3_ent5_2	SY_SlidingWindow_mom3_ent5_2	stationarity	667	394	0.981482	0.000122046	0.981482
FC_Surprise_T1_20_2_udq_500.median	FC_Surprise_T1_20_2_udq_500_median	information,symbolic	2379	793	0.981453	0.000122046	0.981453
SY_LocalDistributions_5_par.stddiv	SY_LocalDistributions_5_par_stddiv	stationarity	2202	489	0.981444	0.000122046	0.981444
CO_FirstMin_ac	first_min_acf	correlation,tau	135	134	0.981403	0.000122046	0.981403
MF_hmm_CompareNStates_06_24.LLtestdiff2	MF_hmm_CompareNStates_06_24_LLtestdiff2	hmm,model	7753	1050	0.981356	0.000122046	0.981356
SY_SlidingWindow_ent_ent10_2	SY_SlidingWindow_ent_ent10_2	stationarity	624	351	0.981312	0.000122046	0.981312
CO_AddNoise_1_kraskov1_4.ami_at_20	CO_AddNoise_1_kraskov1_4_ami_at_20	correlation,AMI,entropy	1305	729	0.981273	0.000122046	0.981273
MF_steps_ahead_arma_3_1_6.rmserr_4	MF_steps_ahead_arma_3_1_6_rmserr_4	model,prediction	7083	1014	-0.98126	0.000122046	0.98126
MF_steps_ahead_arma_3_1_6.stddiffrms	MF_steps_ahead_arma_3_1_6_stddiffrms	model,prediction	7095	1014	0.981257	0.000122046	0.981257
FC_Surprise_T1_20_tau_m2quad_500.uq	FC_Surprise_T1_20_tau_m2quad_500_uq	information,symbolic	2491	807	-0.981221	0.000122046	0.981221
PP_Compare_medianf3.swss5_2	PP_Compare_medianf3_swss5_2	preprocessing,raw,stationarity	6171	970	-0.981162	0.000122046	0.981162
MF_steps_ahead_ss_best_6.mabserr_4	MF_steps_ahead_ss_best_6_mabserr_4	model,prediction	7061	1013	-0.981151	0.000122046	0.981151
CO_HistogramAMI_std1_5.ami4	CO_HistogramAMI_std1_5_4	information,correlation,AMI	215	207	0.981135	0.000122046	0.981135
FC_Surprise_T1_100_4_udq_500.lq	FC_Surprise_T1_100_4_udq_500_lq	information,symbolic	2396	795	0.981128	0.000122046	0.981128
SY_SlidingWindow_mom3_ent2_10	SY_SlidingWindow_mom3_ent2_10	stationarity	665	392	0.98111	0.000122046	0.98111
MD_polvar_1_3	MD_polvar_1_3	medical,symbolic	1082	691	0.981101	0.000122046	0.981101
PH_Walker_biasprop_01_05.w_propzcross	PH_Walker_biasprop_01_05_w_propzcross	trend	2626	816	-0.98105	0.000122046	0.98105
NL_TSTL_ReturnTime_10_1_1_n1_ac_8.hcgdist	NL_TSTL_ReturnTime_10_1_1_n1_ac_8_hcgdist	nonlinear,tstool	5755	946	-0.981042	0.000122046	0.981042
SY_SlidingWindow_s_ent10_10	SY_SlidingWindow_s_ent10_10	stationarity	603	330	0.981013	0.000122046	0.981013
ST_LocalExtrema_n25.meanabsmin	ST_LocalExtrema_n25_meanabsmin	distribution,stationarity	3360	868	-0.980996	0.000122046	0.980996
TSTL_localdensity_5_40_1_3.ac5den	TSTL_localdensity_5_40_1_3_ac5den	nonlinear,tstool	5539	940	0.980928	0.000122046	0.980928
FC_Surprise_T1_50_3_udq_500.lq	FC_Surprise_T1_50_3_udq_500_lq	information,symbolic	2388	794	0.980928	0.000122046	0.980928
SP_Summaries_fft_logdev.logarea_3_2	SP_Summaries_fft_logdev_logarea_3_2	spectral	4725	911	-0.980903	0.000122046	0.980903
CO_AddNoise_1_std1_10.fitexpa	CO_AddNoise_1_std1_10_fitexpa	correlation,AMI,entropy	1231	725	0.980902	0.000122046	0.980902
SC_FluctAnal_2_rsrangefit_50_1_logi.se2	SC_FluctAnal_2_rsrangefit_50_1_logi_se2	scaling	4032	898	0.980838	0.000122046	0.980838
SC_FluctAnal_2_rsrangefit_50_1_logi.se1	SC_FluctAnal_2_rsrangefit_50_1_logi_se1	scaling	4031	898	0.980838	0.000122046	0.980838
SB_MotifThree_diffquant.bcbc	SB_MotifThree_diffquant_bcbc	symbolic,motifs	3803	882	0.980826	0.000122046	0.980826
SP_Summaries_pgram_hamm.w25_75	SP_Summaries_pgram_hamm_w25_75	spectral	4303	908	-0.980824	0.000122046	0.980824
FC_Surprise_dist_10_tau_m2quad_500.mean	FC_Surprise_dist_10_tau_m2quad_500_mean	information,symbolic	2458	803	-0.980823	0.000122046	0.980823
CO_Embed2_Basic_1.parabup05	CO_Embed2_Basic_1_parabup05	correlation	1533	742	0.980806	0.000122046	0.980806
MF_GP_LocalPrediction_covSEiso_covNoise_5_3_10_beforeafter.meanlogh3	MF_GP_LocalPrediction_covSEiso_covNoise_5_3_10_beforeafter_meanlogh3	model,GaussianProcess	6534	985	-0.980798	0.000122046	0.980798
SY_SpreadRandomLocal_100_100.stdstd	SY_SpreadRandomLocal_100_100_stdstd	stationarity	2136	479	0.980703	0.000122046	0.980703
MF_CompareTestSets_y_ar_4_rand_25_01_1.meandiffs_iqr	MF_CompareTestSets_y_ar_4_rand_25_01_1_meandiffs_iqr	model,prediction,stationarity	7173	1020	-0.980698	0.000122046	0.980698
CO_HistogramAMI_std1_2.ami4	CO_HistogramAMI_std1_2_4	information,correlation,AMI	210	206	0.980686	0.000122046	0.980686
AC_nl_1234567	AC_nl_1234567	correlation,nonlinearautocorr	141	145	0.980661	0.000122046	0.980661
MS_shannon_2_1t10.minent	MS_shannon_2_1t10_minent	entropy,mex	6925	688	-0.98064	0.000122046	0.98064
IN_AutoMutualInfoStats_diff_20_kraskov1_4.mami	IN_AutoMutualInfoStats_diff_20_kraskov1_4_mami	information,correlation,AMI	432	716	-0.980604	0.000122046	0.980604
NL_TISEAN_fnn_1_10_005.nHood2_6	NL_TISEAN_fnn_1_10_005_nHood2_6	nonlinear,dimension,tisean	4880	917	-0.980599	0.000122046	0.980599
AC_nl_12345678	AC_nl_12345678	correlation,nonlinearautocorr	142	146	0.980586	0.000122046	0.980586
SY_SpreadRandomLocal_200_100.stdskew	SY_SpreadRandomLocal_200_100_stdskew	stationarity	2153	480	0.980551	0.000122046	0.980551
SB_BinaryStats_iqr.stdstretch1	SB_BinaryStats_iqr_stdstretch1	distribution,stationarity	3494	877	0.980503	0.000122046	0.980503
SY_SlidingWindow_mom3_s5_10	SY_SlidingWindow_mom3_s5_10	stationarity	654	381	0.980492	0.000122046	0.980492
FC_Surprise_T1_100_5_q_500.uq	FC_Surprise_T1_100_5_q_500_uq	information,symbolic	2301	783	-0.980471	0.000122046	0.980471
MD_hrv_classic.pnn5	MD_hrv_classic_pnn5	medical	7754	1051	-0.980469	0.000122046	0.980469
MS_shannon_2t10_2.meanent	MS_shannon_2t10_2_meanent	entropy,mex	6912	685	-0.980466	0.000122046	0.980466
FC_Surprise_T2_100_tau_m2quad_500.max	FC_Surprise_T2_100_tau_m2quad_500_max	information,symbolic	2511	810	0.980453	0.000122046	0.980453
IN_AutoMutualInfoStats_40_kraskov1_4.ami5	IN_AutoMutualInfoStats_40_kraskov1_4_ami5	information,correlation,AMI	326	714	0.980448	0.000122046	0.980448
SB_MotifThree_diffquant.accb	SB_MotifThree_diffquant_accb	symbolic,motifs	3778	882	0.980333	0.000122046	0.980333
CO_Embed2_Basic_1.incircle_02	CO_Embed2_Basic_1_incircle_02	correlation	1548	742	0.980326	0.000122046	0.980326
MF_steps_ahead_ss_best_6.stddiffrms	MF_steps_ahead_ss_best_6_stddiffrms	model,prediction	7072	1013	0.9803	0.000122046	0.9803
MF_steps_ahead_ar_best_6.stddiffrms	MF_steps_ahead_ar_best_6_stddiffrms	model,prediction,arfit	7049	1012	0.980289	0.000122046	0.980289
DN_SimpleFit_sin2.rmse	DN_SimpleFit_sin2_rmse	model,gof	3877	889	-0.980274	0.000122046	0.980274
SY_SlidingWindow_mom3_ent10_10	SY_SlidingWindow_mom3_ent10_10	stationarity	671	398	0.980259	0.000122046	0.980259
PH_Walker_prop_05.w_ac2	PH_Walker_prop_05_w_ac2	trend	2542	812	0.980255	0.000122046	0.980255
EN_mse_1-10_2_015_diff1.maxSampEn	EN_mse_1-10_2_015_diff1_maxSampEn	entropy,sampen,controlen,mse	2774	828	0.980254	0.000122046	0.980254
EN_mse_1-10_2_015_diff1.sampen_s1	EN_mse_1-10_2_015_diff1_sampen_s1	entropy,sampen,controlen,mse	2764	828	0.980254	0.000122046	0.980254
WL_dwtcoeff_db3_5.stdd_l4	WL_dwtcoeff_db3_5_stdd_l4	wavelet,dwt	6733	1000	0.980226	0.000122046	0.980226
SP_Summaries_fft_logdev.logarea_2_2	SP_Summaries_fft_logdev_logarea_2_2	spectral	4719	911	-0.980215	0.000122046	0.980215
FC_Surprise_T2_100_4_udq_500.tstat	FC_Surprise_T2_100_4_udq_500_tstat	information,symbolic	2431	799	-0.980201	0.000122046	0.980201
CO_HistogramAMI_quantiles_2.ami3	CO_HistogramAMI_quantiles_2_3	information,correlation,AMI	254	215	0.980191	0.000122046	0.980191
FC_Surprise_dist_100_4_q_500.tstat	FC_Surprise_dist_100_4_q_500_tstat	information,symbolic	2263	778	-0.980142	0.000122046	0.980142
CO_RM_AMInformation_5	RM_ami_5	information,correlation,AMI	196	200	0.980137	0.000122046	0.980137
AC_nl_055	AC_nl_055	correlation,nonlinearautocorr	162	166	0.980136	0.000122046	0.980136
SC_FluctAnal_2_dfa_50_1_2_logi.meanssr	SC_FluctAnal_2_dfa_50_1_2_logi_meanssr	scaling	4158	903	0.980126	0.000122046	0.980126
SY_DriftingMean20.meanabsmaxmin	SY_DriftingMean20_meanabsmaxmin	stationarity	2163	481	0.980112	0.000122046	0.980112
SY_SlidingWindow_lil_s10_10	SY_SlidingWindow_lil_s10_10	stationarity	703	430	0.980107	0.000122046	0.980107
ST_LocalExtrema_n25.medianabsmin	ST_LocalExtrema_n25_medianabsmin	distribution,stationarity	3363	868	-0.980089	0.000122046	0.980089
CO_Embed2_AngleTau_50.ac1_thetaac2	CO_Embed2_AngleTau_50_ac1_thetaac2	correlation,embedding	1941	768	-0.98005	0.000122046	0.98005
FC_Surprise_T2_100_5_udq_500.mean	FC_Surprise_T2_100_5_udq_500_mean	information,symbolic	2434	800	-0.980032	0.000122046	0.980032
MF_CompareTestSets_y_ar_4_rand_25_01_1.meandiffs_mean	MF_CompareTestSets_y_ar_4_rand_25_01_1_meandiffs_mean	model,prediction,stationarity	7170	1020	-0.980008	0.000122046	0.980008
NL_crptool_fnn_10_2_1.fnn6	NL_crptool_fnn_10_2_1_fnn6	nonlinear,dimension,crptool	4792	914	-0.98	0.000122046	0.98
SP_Summaries_pgram_hamm.peakPower_2	SP_Summaries_pgram_hamm_peakPower_2	spectral	4271	908	0.979996	0.000122046	0.979996
CO_HistogramAMI_std2_10.ami5	CO_HistogramAMI_std2_10_5	information,correlation,AMI	236	211	0.979995	0.000122046	0.979995
NL_DVV_3_100_2_50_10_default.meanDiffSurr	NL_DVV_3_100_2_50_10_default_meanDiffSurr	delayVectorVariance	1034	646	-0.979967	0.000122046	0.979967
SB_TransitionpAlphabet_40_1.trfexp_a	SB_TransitionpAlphabet_40_1_trfexp_a	symbolic,transitionmat	1455	739	0.979964	0.000122046	0.979964
PH_Walker_momentum_5.sw_meanabsdiff	PH_Walker_momentum_5_sw_meanabsdiff	trend	2667	818	-0.979958	0.000122046	0.979958
SY_SlidingWindow_lil_s10_2	SY_SlidingWindow_lil_s10_2	stationarity	702	429	0.979938	0.000122046	0.979938
SB_MotifThree_diffquant.cbcb	SB_MotifThree_diffquant_cbcb	symbolic,motifs	3823	882	0.979937	0.000122046	0.979937
MF_CompareTestSets_y_ar_4_rand_25_01_1.meandiffs_median	MF_CompareTestSets_y_ar_4_rand_25_01_1_meandiffs_median	model,prediction,stationarity	7171	1020	-0.979935	0.000122046	0.979935
IN_AutoMutualInfoStats_40_gaussian.ami4	IN_AutoMutualInfoStats_40_gaussian_ami4	information,correlation,AMI	270	713	0.979916	0.000122046	0.979916
CO_TranslateShape_circle_35_pts.fives	CO_TranslateShape_circle_35_pts_fives	correlation	1820	764	-0.979912	0.000122046	0.979912
SP_Summaries_fft_logdev.logarea_5_3	SP_Summaries_fft_logdev_logarea_5_3	spectral	4745	911	-0.979848	0.000122046	0.979848
NL_TISEAN_fnn_mi_10_005.pfnn_1	NL_TISEAN_fnn_mi_10_005_pfnn_1	nonlinear,dimension,tisean	4839	916	-0.979847	0.000122046	0.979847
NL_TSTL_FractalDimensions_5_20_02_1_10_0_32_ac_fnnmar.rangeDq	NL_TSTL_FractalDimensions_5_20_02_1_10_0_32_ac_fnnmar_rangeDq	nonlinear,tstool,dimension,correlation,stochastic	5455	933	-0.979841	0.000122046	0.979841
CO_AutoCorrShape_drown.ac1	CO_AutoCorrShape_drown_ac1	correlation	1520	741	0.979829	0.000122046	0.979829
SY_LocalDistributions_5_each.stddiv	SY_LocalDistributions_5_each_stddiv	stationarity	2214	493	0.979824	0.000122046	0.979824
SY_LocalDistributions_3_each.mindiv	SY_LocalDistributions_3_each_mindiv	stationarity	2205	491	0.979801	0.000122046	0.979801
ST_LocalExtrema_l100.medianabsext	ST_LocalExtrema_l100_medianabsext	distribution,stationarity	3348	867	-0.979787	0.000122046	0.979787
PH_ForcePotential_dblwell_1_02_01.ac1	PH_ForcePotential_dblwell_1_02_01_ac1	dynamicalSystem	1598	745	-0.979722	0.000122046	0.979722
MF_CompareTestSets_y_ar_4_rand_25_01_1.meandiffs_std	MF_CompareTestSets_y_ar_4_rand_25_01_1_meandiffs_std	model,prediction,stationarity	7172	1020	-0.979721	0.000122046	0.979721
MS_shannon_3_1t10.meanent	MS_shannon_3_1t10_meanent	entropy,mex	6932	689	-0.979653	0.000122046	0.979653
SB_MotifThree_diffquant.baab	SB_MotifThree_diffquant_baab	symbolic,motifs	3781	882	0.979611	0.000122046	0.979611
EN_PermEn_5_ac.normPermEn	EN_PermEn_5_ac_normPermEn	entropy	927	568	-0.979551	0.000122046	0.979551
DK_crinkle_statistic	DK_crinkle_statistic	misc	1051	654	-0.979548	0.000122046	0.979548
MF_GP_hyperparameters_covSEiso_covPeriodic_covNoise_1_200_first.maxS	MF_GP_hyperparameters_covSEiso_covPeriodic_covNoise_1_200_first_maxS	model,GaussianProcess	6504	983	-0.979543	0.000122046	0.979543
CO_CompareMinAMI_std2_2_80.conv4	CO_CompareMinAMI_std2_2_80_conv4	correlation,AMI	489	720	0.979536	0.000122046	0.979536
CO_HistogramAMI_even_10.ami5	CO_HistogramAMI_even_10_5	information,correlation,AMI	251	214	0.979529	0.000122046	0.979529
MS_shannon_2t10_2.medent	MS_shannon_2t10_2_medent	entropy,mex	6911	685	-0.979514	0.000122046	0.979514
FC_Surprise_dist_5_2_udq_500.std	FC_Surprise_dist_5_2_udq_500_std	information,symbolic	2342	788	0.979489	0.000122046	0.979489
EN_SampEn_5_01.sampen3	EN_SampEn_5_01_sampen3	entropy,sampen	2708	821	-0.979489	0.000122046	0.979489
NL_TSTL_ReturnTime_10_1_1_n1_ac_8.statrtys	NL_TSTL_ReturnTime_10_1_1_n1_ac_8_statrtys	nonlinear,tstool	5752	946	0.979484	0.000122046	0.979484
NL_TSTL_ReturnTime_5_1_40_n1_1_8.pzeros	NL_TSTL_ReturnTime_5_1_40_n1_1_8_pzeros	nonlinear,tstool	5762	947	0.979462	0.000122046	0.979462
AC_nl_005	AC_nl_005	correlation,nonlinearautocorr	168	172	0.979459	0.000122046	0.979459
SB_MotifThree_diffquant.aabb	SB_MotifThree_diffquant_aabb	symbolic,motifs	3757	882	0.97944	0.000122046	0.97944
NL_TISEAN_c1_1_1_7_002_05.ranged	NL_TISEAN_c1_1_1_7_002_05_ranged	nonlinear,tisean,dimension,entropy	5063	922	-0.979407	0.000122046	0.979407
FC_Surprise_T2_100_4_q_500.std	FC_Surprise_T2_100_4_q_500_std	information,symbolic	2326	786	0.979405	0.000122046	0.979405
SB_MotifThree_diffquant.cbc	SB_MotifThree_diffquant_cbc	symbolic,motifs	3748	882	0.979379	0.000122046	0.979379
MF_CompareAR_1_10_05.bestaic	MF_CompareAR_1_10_05_bestaic	model	7393	1029	-0.979372	0.000122046	0.979372
CO_HistogramAMI_quantiles_5.ami4	CO_HistogramAMI_quantiles_5_4	information,correlation,AMI	260	216	0.979366	0.000122046	0.979366
SB_BinaryStats_iqr.longstretch1	SB_BinaryStats_iqr_longstretch1	distribution,stationarity	3489	877	0.979359	0.000122046	0.979359
CO_CompareMinAMI_quantiles_2_80.conv4	CO_CompareMinAMI_quantiles_2_80_conv4	correlation,AMI	467	718	0.979348	0.000122046	0.979348
MF_steps_ahead_ss_best_6.mabserr_5	MF_steps_ahead_ss_best_6_mabserr_5	model,prediction	7064	1013	-0.979323	0.000122046	0.979323
MF_CompareTestSets_y_ss_best_uniform_25_01_1.meandiffs_mean	MF_CompareTestSets_y_ss_best_uniform_25_01_1_meandiffs_mean	model,prediction,stationarity	7210	1022	-0.979319	0.000122046	0.979319
SP_Summaries_fft_logdev.statav5_s	SP_Summaries_fft_logdev_statav5_s	spectral	4751	911	0.979306	0.000122046	0.979306
SP_Summaries_fft_logdev.logarea_4_2	SP_Summaries_fft_logdev_logarea_4_2	spectral	4733	911	-0.979265	0.000122046	0.979265
TSTL_localdensity_5_40_ac_2.ac4den	TSTL_localdensity_5_40_ac_2_ac4den	nonlinear,tstool	5524	939	0.979188	0.000122046	0.979188
WL_cwt_db3_32.maxabsC	WL_cwt_db3_32_maxabsC	wavelet,cwt	6588	989	0.97916	0.000122046	0.97916
FC_Surprise_T1_100_4_udq_500.median	FC_Surprise_T1_100_4_udq_500_median	information,symbolic	2395	795	0.979139	0.000122046	0.979139
SY_SlidingWindow_ent_s10_10	SY_SlidingWindow_ent_s10_10	stationarity	612	339	0.979119	0.000122046	0.979119
FC_LocalSimple_mean2.ac2	FC_LocalSimple_mean2_ac2	forecasting	3005	834	0.97911	0.000122046	0.97911
SY_SlidingWindow_lil_s10_1	SY_SlidingWindow_lil_s10_1	stationarity	701	428	0.979099	0.000122046	0.979099
SP_Summaries_welch_rect.w25_75	SP_Summaries_welch_rect_w25_75	spectral	4427	909	-0.979041	0.000122046	0.979041
NL_TSTL_LargestLyap_n1_01_001_3_mi_fnnmar.to095max	NL_TSTL_LargestLyap_n1_01_001_3_mi_fnnmar_to095max	nonlinear,tstool	5695	944	0.97903	0.000122046	0.97903
MF_CompareTestSets_y_ss_best_uniform_25_01_1.meandiffs_std	MF_CompareTestSets_y_ss_best_uniform_25_01_1_meandiffs_std	model,prediction,stationarity	7212	1022	-0.979029	0.000122046	0.979029
SP_Summaries_fft.w25_75	SP_Summaries_fft_w25_75	spectral	4551	910	-0.979021	0.000122046	0.979021
SP_Summaries_fft_logdev.logarea_3_3	SP_Summaries_fft_logdev_logarea_3_3	spectral	4727	911	-0.979017	0.000122046	0.979017
FC_Surprise_T1_100_5_udq_500.median	FC_Surprise_T1_100_5_udq_500_median	information,symbolic	2403	796	0.979016	0.000122046	0.979016
SB_MotifThree_quantile.aacc	SB_MotifThree_quantile_aacc	symbolic,motifs	3641	881	-0.979	0.000122046	0.979
MF_arfit_1_8_sbc.meantau	MF_arfit_1_8_sbc_meantau	modelfit,arfit	6801	1002	0.97899	0.000122046	0.97899
SP_Summaries_fft_logdev.peakPower_5	SP_Summaries_fft_logdev_peakPower_5	spectral	4644	911	0.978952	0.000122046	0.978952
FC_Surprise_T1_50_tau_m2quad_500.median	FC_Surprise_T1_50_tau_m2quad_500_median	information,symbolic	2497	808	-0.978951	0.000122046	0.978951
MF_GP_LocalPrediction_covSEiso_covNoise_10_3_20_frombefore.meanerrbar	MF_GP_LocalPrediction_covSEiso_covNoise_10_3_20_frombefore_meanerrbar	model,GaussianProcess	6546	986	-0.978946	0.000122046	0.978946
NW_VisibilityGraph_norm.dexpk_rmse	NW_VisibilityGraph_norm_dexpk_rmse	network,visibilityGraph	2049	773	-0.97894	0.000122046	0.97894
SP_Summaries_fft_logdev.logarea_4_3	SP_Summaries_fft_logdev_logarea_4_3	spectral	4735	911	-0.978939	0.000122046	0.978939
SP_Summaries_pgram_hamm.mom4	SP_Summaries_pgram_hamm_mom4	spectral	4289	908	0.978927	0.000122046	0.978927
SB_MotifTwo_mean.uuud	SB_MotifTwo_mean_uuud	symbolic,motifs	3560	879	-0.978927	0.000122046	0.978927
SY_VarRatioTest_4_1.stat	SY_VarRatioTest_4_1_stat	vratiotest	7683	1041	0.978917	0.000122046	0.978917
SY_VarRatioTest_4_1.ratio	SY_VarRatioTest_4_1_ratio	vratiotest	7684	1041	0.978917	0.000122046	0.978917
NW_VisibilityGraph_horiz.entropy	NW_VisibilityGraph_horiz_entropy	network,visibilityGraph	2026	772	-0.978875	0.000122046	0.978875
SB_MotifThree_diffquant.bcb	SB_MotifThree_diffquant_bcb	symbolic,motifs	3741	882	0.978827	0.000122046	0.978827
NW_VisibilityGraph_norm.evparm2	NW_VisibilityGraph_norm_evparm2	network,visibilityGraph	2061	773	0.978816	0.000122046	0.978816
SB_MotifThree_quantile.bbb	SB_MotifThree_quantile_bbb	symbolic,motifs	3618	881	0.978809	0.000122046	0.978809
SC_FluctAnal_2_dfa_50_1_logi.se1	SC_FluctAnal_2_dfa_50_1_logi_se1	scaling	4079	900	0.978804	0.000122046	0.978804
SC_FluctAnal_2_dfa_50_1_logi.se2	SC_FluctAnal_2_dfa_50_1_logi_se2	scaling	4080	900	0.978804	0.000122046	0.978804
FC_Surprise_dist_20_2_udq_500.tstat	FC_Surprise_dist_20_2_udq_500_tstat	information,symbolic	2351	789	-0.978788	0.000122046	0.978788
NL_TISEAN_c1_1_1_7_002_05.maxd	NL_TISEAN_c1_1_1_7_002_05_maxd	nonlinear,tisean,dimension,entropy	5062	922	-0.978758	0.000122046	0.978758
NL_TISEAN_c1_1_1_7_002_05.maxmd	NL_TISEAN_c1_1_1_7_002_05_maxmd	nonlinear,tisean,dimension,entropy	5064	922	-0.978724	0.000122046	0.978724
FC_Surprise_T1_100_5_udq_500.lq	FC_Surprise_T1_100_5_udq_500_lq	information,symbolic	2404	796	0.978719	0.000122046	0.978719
SY_SlidingWindow_s_s10_10	SY_SlidingWindow_s_s10_10	stationarity	589	316	0.978699	0.000122046	0.978699
SB_MotifTwo_mean.uu	SB_MotifTwo_mean_uu	symbolic,motifs	3535	879	0.978677	0.000122046	0.978677
SY_SlidingWindow_mom3_s5_2	SY_SlidingWindow_mom3_s5_2	stationarity	653	380	0.978636	0.000122046	0.978636
MF_CompareTestSets_y_ar_best_uniform_25_01_1.meandiffs_std	MF_CompareTestSets_y_ar_best_uniform_25_01_1_meandiffs_std	model,prediction,arfit,stationarity	7192	1021	-0.978613	0.000122046	0.978613
CO_HistogramAMI_std2_5.ami5	CO_HistogramAMI_std2_5_5	information,correlation,AMI	231	210	0.978605	0.000122046	0.978605
SB_TransitionpAlphabet_40_1.mineigfexp_b	SB_TransitionpAlphabet_40_1_mineigfexp_b	symbolic,transitionmat	1477	739	0.978583	0.000122046	0.978583
ST_LocalExtrema_l50.meanabsmin	ST_LocalExtrema_l50_meanabsmin	distribution,stationarity	3316	866	-0.978582	0.000122046	0.978582
SP_Summaries_fft.linfitloglog_all_sigma	SP_Summaries_fft_linfitloglog_all_sigma	spectral	4570	910	0.978537	0.000122046	0.978537
SP_Summaries_fft.linfitloglog_all_sea1	SP_Summaries_fft_linfitloglog_all_sea1	spectral	4571	910	0.978537	0.000122046	0.978537
NL_TSTL_acp_1_001_025_10_05.sacpf_4	NL_TSTL_acp_1_001_025_10_05_sacpf_4	nonlinear,correlation	5156	925	0.978522	0.000122046	0.978522
PH_Walker_prop_09.res_ac1	PH_Walker_prop_09_res_ac1	trend	2577	813	0.97851	0.000122046	0.97851
SP_Summaries_fft_logdev.logarea_4_4	SP_Summaries_fft_logdev_logarea_4_4	spectral	4737	911	-0.978498	0.000122046	0.978498
MF_FitSubsegments_arma_2_2_uniform_25_01.q_2_max	MF_FitSubsegments_arma_2_2_uniform_25_01_q_2_max	model,prediction	7156	1019	-0.978487	0.000122046	0.978487
EX_MovingThreshold_1_01.stdkickf	EX_MovingThreshold_1_01_stdkickf	outliers	3450	873	0.978453	0.000122046	0.978453
SP_Summaries_welch_rect.linfitloglog_all_sea1	SP_Summaries_welch_rect_linfitloglog_all_sea1	spectral	4447	909	0.978446	0.000122046	0.978446
SP_Summaries_welch_rect.linfitloglog_all_sigma	SP_Summaries_welch_rect_linfitloglog_all_sigma	spectral	4446	909	0.978446	0.000122046	0.978446
MS_shannon_2t10_2.maxent	MS_shannon_2t10_2_maxent	entropy,mex	6909	685	-0.978436	0.000122046	0.978436
SP_Summaries_welch_rect.mom4	SP_Summaries_welch_rect_mom4	spectral	4413	909	0.978405	0.000122046	0.978405
SP_Summaries_fft.mom4	SP_Summaries_fft_mom4	spectral	4537	910	0.978403	0.000122046	0.978403
SB_TransitionMatrix_41.stddiag	SB_TransitionMatrix_41_stddiag	symbolic,transitionmat	1355	733	0.978398	0.000122046	0.978398
SC_FluctAnal_2_dfa_50_2_logi.ssr	SC_FluctAnal_2_dfa_50_2_logi_ssr	scaling	4105	901	0.978369	0.000122046	0.978369
CO_TranslateShape_circle_25_pts.statav4_s	CO_TranslateShape_circle_25_pts_statav4_s	correlation,stationarity	1810	763	0.978366	0.000122046	0.978366
SC_FluctAnal_2_rsrange_50_logi.se1	SC_FluctAnal_2_rsrange_50_logi_se1	scaling	4007	897	0.978348	0.000122046	0.978348
SC_FluctAnal_2_rsrange_50_logi.se2	SC_FluctAnal_2_rsrange_50_logi_se2	scaling	4008	897	0.978348	0.000122046	0.978348
MF_CompareTestSets_y_ar_best_uniform_25_01_1.meandiffs_median	MF_CompareTestSets_y_ar_best_uniform_25_01_1_meandiffs_median	model,prediction,arfit,stationarity	7191	1021	-0.978309	0.000122046	0.978309
PH_Walker_prop_11.sw_ac1rat	PH_Walker_prop_11_sw_ac1rat	trend	2589	814	0.978295	0.000122046	0.978295
SB_MotifTwo_mean.duuu	SB_MotifTwo_mean_duuu	symbolic,motifs	3553	879	-0.978266	0.000122046	0.978266
NL_TISEAN_fnn_1_10_005.nHood2_2	NL_TISEAN_fnn_1_10_005_nHood2_2	nonlinear,dimension,tisean	4876	917	-0.978246	0.000122046	0.978246
NL_TISEAN_fnn_mi_10_005.nHood2_6	NL_TISEAN_fnn_mi_10_005_nHood2_6	nonlinear,dimension,tisean	4854	916	-0.978233	0.000122046	0.978233
TSTL_localdensity_5_40_1_3.iqrden	TSTL_localdensity_5_40_1_3_iqrden	nonlinear,tstool	5530	940	-0.978205	0.000122046	0.978205
MF_CompareTestSets_y_ar_best_uniform_25_01_1.meandiffs_iqr	MF_CompareTestSets_y_ar_best_uniform_25_01_1_meandiffs_iqr	model,prediction,arfit,stationarity	7193	1021	-0.978184	0.000122046	0.978184
MF_CompareTestSets_y_ar_best_uniform_25_01_1.meandiffs_mean	MF_CompareTestSets_y_ar_best_uniform_25_01_1_meandiffs_mean	model,prediction,arfit,stationarity	7190	1021	-0.978183	0.000122046	0.978183
CO_fzcglscf_1_10	CO_fzcglscf_1_10	correlation,glscf,tau	536	263	0.978176	0.000122046	0.978176
SY_SlidingWindow_s_ent10_2	SY_SlidingWindow_s_ent10_2	stationarity	602	329	0.978129	0.000122046	0.978129
FC_Surprise_T2_50_3_q_500.std	FC_Surprise_T2_50_3_q_500_std	information,symbolic	2318	785	0.978107	0.000122046	0.978107
CO_glscf_1_5_5	CO_glscf_1_5_5	correlation,glscf	507	234	0.978103	0.000122046	0.978103
MF_CompareTestSets_y_ss_best_uniform_25_01_1.meandiffs_median	MF_CompareTestSets_y_ss_best_uniform_25_01_1_meandiffs_median	model,prediction,stationarity	7211	1022	-0.978102	0.000122046	0.978102
SB_MotifThree_quantile.bbcc	SB_MotifThree_quantile_bbcc	symbolic,motifs	3677	881	0.97809	0.000122046	0.97809
MF_hmm_08_2.rangeMu	MF_hmm_08_2_rangeMu	hmm,model	7735	1049	0.978064	0.000122046	0.978064
CO_AddNoise_1_gaussian.firstUnder50	CO_AddNoise_1_gaussian_firstUnder50	correlation,AMI,entropy	1262	727	-0.978062	0.000122046	0.978062
FC_Surprise_T1_50_tau_m2quad_500.std	FC_Surprise_T1_50_tau_m2quad_500_std	information,symbolic	2500	808	0.978058	0.000122046	0.978058
CO_Embed2_Shapes_tau_circle_01.tau	CO_Embed2_Shapes_tau_circle_01_tau	correlation,embedding	1968	770	0.977993	0.000122046	0.977993
FC_LocalSimple_lfittau.ac2	FC_LocalSimple_lfittau_ac2	forecasting	3135	846	0.977965	0.000122046	0.977965
FC_Surprise_T2_100_5_udq_500.tstat	FC_Surprise_T2_100_5_udq_500_tstat	information,symbolic	2439	800	0.977944	0.000122046	0.977944
MF_arfit_1_8_sbc.sumA	MF_arfit_1_8_sbc_sumA	modelfit,arfit	6769	1002	0.977942	0.000122046	0.977942
MF_FitSubsegments_ss_2_uniform_25_01.fpe_range	MF_FitSubsegments_ss_2_uniform_25_01_fpe_range	model,prediction	7136	1018	-0.977941	0.000122046	0.977941
SY_LocalDistributions_3_par.mindiv	SY_LocalDistributions_3_par_mindiv	stationarity	2193	487	0.977936	0.000122046	0.977936
FC_LocalSimple_meantau.stderr	FC_LocalSimple_meantau_stderr	forecasting	3030	837	-0.977931	0.000122046	0.977931
SB_MotifThree_diffquant.bb	SB_MotifThree_diffquant_bb	symbolic,motifs	3719	882	-0.977912	0.000122046	0.977912
PP_Compare_medianf3.swss5_1	PP_Compare_medianf3_swss5_1	preprocessing,raw,stationarity	6170	970	-0.977907	0.000122046	0.977907
ST_LocalExtrema_l50.medianabsmin	ST_LocalExtrema_l50_medianabsmin	distribution,stationarity	3319	866	-0.977877	0.000122046	0.977877
MF_CompareTestSets_y_ss_best_uniform_25_01_1.meandiffs_iqr	MF_CompareTestSets_y_ss_best_uniform_25_01_1_meandiffs_iqr	model,prediction,stationarity	7213	1022	-0.977869	0.000122046	0.977869
SP_Summaries_fft_logdev.fpoly2csS_p2	SP_Summaries_fft_logdev_fpoly2csS_p2	spectral	4677	911	0.977866	0.000122046	0.977866
SY_VarRatioTest_24682468_00001111.meanstat	SY_VarRatioTest_24682468_00001111_meanstat	vratiotest	7692	1042	0.977855	0.000122046	0.977855
MD_hrv_classic.lf	MD_hrv_classic_lf	medical	7761	1051	0.977855	0.000122046	0.977855
SP_Summaries_fft_logdev.logarea_5_5	SP_Summaries_fft_logdev_logarea_5_5	spectral	4749	911	-0.977759	0.000122046	0.977759
FC_Surprise_dist_100_4_q_500.max	FC_Surprise_dist_100_4_q_500_max	information,symbolic	2257	778	0.977742	0.000122046	0.977742
SP_Summaries_fft_logdev.logarea_5_4	SP_Summaries_fft_logdev_logarea_5_4	spectral	4747	911	-0.97774	0.000122046	0.97774
CP_ML_StepDetect_l1pwc_02.pshort_3	CP_ML_StepDetect_l1pwc_02_pshort_3	stepdetection	7799	1054	0.977724	0.000122046	0.977724
SB_MotifThree_diffquant.bbb	SB_MotifThree_diffquant_bbb	symbolic,motifs	3738	882	-0.977672	0.000122046	0.977672
SP_Summaries_pgram_hamm.linfitloglog_all_sea1	SP_Summaries_pgram_hamm_linfitloglog_all_sea1	spectral	4323	908	0.977651	0.000122046	0.977651
SP_Summaries_pgram_hamm.linfitloglog_all_sigma	SP_Summaries_pgram_hamm_linfitloglog_all_sigma	spectral	4322	908	0.977651	0.000122046	0.977651
SB_MotifThree_quantile.bbbc	SB_MotifThree_quantile_bbbc	symbolic,motifs	3674	881	0.977617	0.000122046	0.977617
SP_Summaries_fft.wmax_95	SP_Summaries_fft_wmax_95	spectral	4548	910	-0.977611	0.000122046	0.977611
SP_Summaries_welch_rect.wmax_95	SP_Summaries_welch_rect_wmax_95	spectral	4424	909	-0.977607	0.000122046	0.977607
CO_fzcglscf_1_9	CO_fzcglscf_1_9	correlation,glscf,tau	535	262	0.977544	0.000122046	0.977544
SP_Summaries_pgram_hamm.wmax_95	SP_Summaries_pgram_hamm_wmax_95	spectral	4300	908	-0.977535	0.000122046	0.977535
SB_MotifThree_diffquant.bbcc	SB_MotifThree_diffquant_bbcc	symbolic,motifs	3797	882	0.977511	0.000122046	0.977511
SB_MotifTwo_median.uuud	SB_MotifTwo_median_uuud	symbolic,motifs	3592	880	-0.977458	0.000122046	0.977458
CO_Embed2_Basic_1.parabdown01	CO_Embed2_Basic_1_parabdown01	correlation	1534	742	0.977457	0.000122046	0.977457
SP_Summaries_fft.maxS	SP_Summaries_fft_maxS	spectral	4507	910	0.977451	0.000122046	0.977451
SP_Summaries_welch_rect.maxS	SP_Summaries_welch_rect_maxS	spectral	4383	909	0.977443	0.000122046	0.977443
SP_Summaries_welch_rect.maxProm	SP_Summaries_welch_rect_maxProm	spectral	4391	909	0.977441	0.000122046	0.977441
SP_Summaries_fft.maxProm	SP_Summaries_fft_maxProm	spectral	4515	910	0.977441	0.000122046	0.977441
SY_SlidingWindow_mom3_ent5_1	SY_SlidingWindow_mom3_ent5_1	stationarity	666	393	0.977435	0.000122046	0.977435
SP_Summaries_pgram_hamm.numPeaks_50power	SP_Summaries_pgram_hamm_numPeaks_50power	spectral	4276	908	-0.977418	0.000122046	0.977418
SB_MotifThree_quantile.cbbb	SB_MotifThree_quantile_cbbb	symbolic,motifs	3700	881	0.977345	0.000122046	0.977345
SC_FluctAnal_2_dfa_50_1_2_logi.ssr	SC_FluctAnal_2_dfa_50_1_2_logi_ssr	scaling	4153	903	0.977332	0.000122046	0.977332
SC_FluctAnal_2_dfa_50_3_logi.alpha	SC_FluctAnal_2_dfa_50_3_logi_alpha	scaling	4126	902	0.977309	0.000122046	0.977309
CO_HistogramAMI_quantiles_10.ami5	CO_HistogramAMI_quantiles_10_5	information,correlation,AMI	266	217	0.977309	0.000122046	0.977309
FC_LocalSimple_median3.ac2	FC_LocalSimple_median3_ac2	forecasting	3066	839	0.977253	0.000122046	0.977253
FC_LocalSimple_lfit5.ac1	FC_LocalSimple_lfit5_ac1	forecasting	3124	845	0.977247	0.000122046	0.977247
SB_TransitionMatrix_51.mineig	SB_TransitionMatrix_51_mineig	symbolic,transitionmat	1378	734	0.977236	0.000122046	0.977236
SY_SlidingWindow_mom3_sampen10_2	SY_SlidingWindow_mom3_sampen10_2	stationarity	661	388	0.977233	0.000122046	0.977233
NL_crptool_fnn_10_2_1.fnn7	NL_crptool_fnn_10_2_1_fnn7	nonlinear,dimension,crptool	4793	914	-0.977167	0.000122046	0.977167
SY_SlidingWindow_ent_s10_2	SY_SlidingWindow_ent_s10_2	stationarity	611	338	0.977138	0.000122046	0.977138
SY_DriftingMean20.min	SY_DriftingMean20_min	stationarity	2160	481	-0.977101	0.000122046	0.977101
CO_glscf_2_5_5	CO_glscf_2_5_5	correlation,glscf	525	252	0.977076	0.000122046	0.977076
CP_ML_StepDetect_l1pwc_10.rmsoff	CP_ML_StepDetect_l1pwc_10_rmsoff	stepdetection	7769	1052	0.977067	0.000122046	0.977067
SB_BinaryStats_iqr.meanstretch1	SB_BinaryStats_iqr_meanstretch1	distribution,stationarity	3491	877	0.977065	0.000122046	0.977065
SP_Summaries_fft_logdev.fpoly2_rmse	SP_Summaries_fft_logdev_fpoly2_rmse	spectral	4681	911	0.977047	0.000122046	0.977047
FC_Surprise_T2_50_3_q_500.max	FC_Surprise_T2_50_3_q_500_max	information,symbolic	2313	785	0.977034	0.000122046	0.977034
CO_RM_AMInformation_6	RM_ami_6	information,correlation,AMI	197	201	0.977024	0.000122046	0.977024
SB_BinaryStats_iqr.meanstretch0	SB_BinaryStats_iqr_meanstretch0	distribution,stationarity	3492	877	0.977017	0.000122046	0.977017
SB_MotifThree_diffquant.aab	SB_MotifThree_diffquant_aab	symbolic,motifs	3726	882	0.977003	0.000122046	0.977003
FC_Surprise_T1_100_5_udq_500.tstat	FC_Surprise_T1_100_5_udq_500_tstat	information,symbolic	2407	796	0.976999	0.000122046	0.976999
CO_HistogramAMI_std1_10.ami5	CO_HistogramAMI_std1_10_5	information,correlation,AMI	221	208	0.976979	0.000122046	0.976979
SB_MotifThree_diffquant.aaba	SB_MotifThree_diffquant_aaba	symbolic,motifs	3756	882	0.97691	0.000122046	0.97691
FC_Surprise_T1_50_3_udq_500.tstat	FC_Surprise_T1_50_3_udq_500_tstat	information,symbolic	2391	794	0.976904	0.000122046	0.976904
DN_SimpleFit_sin1.rmse	DN_SimpleFit_sin1_rmse	model,gof	3873	888	-0.976898	0.000122046	0.976898
SY_SlidingWindow_s_s10_2	SY_SlidingWindow_s_s10_2	stationarity	588	315	0.976893	0.000122046	0.976893
SY_VarRatioTest_24682468_00001111.minstat	SY_VarRatioTest_24682468_00001111_minstat	vratiotest	7694	1042	0.976888	0.000122046	0.976888
SB_BinaryStats_diff.stdstretch0	SB_BinaryStats_diff_stdstretch0	distribution,stationarity	3472	875	0.976823	0.000122046	0.976823
IN_AutoMutualInfoStats_40_gaussian.ami16	IN_AutoMutualInfoStats_40_gaussian_ami16	information,correlation,AMI	282	713	0.976822	0.000122046	0.976822
MF_steps_ahead_arma_3_1_6.rmserr_5	MF_steps_ahead_arma_3_1_6_rmserr_5	model,prediction	7086	1014	-0.976818	0.000122046	0.976818
WL_cwt_db3_32.min_ssc	WL_cwt_db3_32_min_ssc	wavelet,cwt	6601	989	-0.976804	0.000122046	0.976804
WL_cwt_sym2_32.maxabsC	WL_cwt_sym2_32_maxabsC	wavelet,cwt	6614	990	0.976794	0.000122046	0.976794
SY_TISEAN_nstat_z_4_1_3.max	SY_TISEAN_nstat_z_4_1_3_max	nonlinear,tisean,model,stationarity	4905	918	-0.976791	0.000122046	0.976791
SB_TransitionMatrix_31.symdiff	SB_TransitionMatrix_31_symdiff	symbolic,transitionmat	1343	732	-0.976767	0.000122046	0.976767
FC_Surprise_T1_20_2_udq_500.mean	FC_Surprise_T1_20_2_udq_500_mean	information,symbolic	2378	793	0.976738	0.000122046	0.976738
CP_ML_StepDetect_l1pwc_005.rmsoffpstep	CP_ML_StepDetect_l1pwc_005_rmsoffpstep	stepdetection	7783	1053	0.976719	0.000122046	0.976719
FC_Surprise_dist_5_tau_m2quad_500.std	FC_Surprise_dist_5_tau_m2quad_500_std	information,symbolic	2454	802	-0.97671	0.000122046	0.97671
FC_LocalSimple_mean1.ac1	FC_LocalSimple_mean1_ac1	forecasting	2994	833	0.976669	0.000122046	0.976669
SY_VarRatioTest_2_1.stat	SY_VarRatioTest_2_1_stat	vratiotest	7679	1039	0.976654	0.000122046	0.976654
PH_Walker_biasprop_05_01.w_ac1	PH_Walker_biasprop_05_01_w_ac1	trend	2601	815	0.976619	0.000122046	0.976619
SP_Summaries_pgram_hamm.maxProm	SP_Summaries_pgram_hamm_maxProm	spectral	4267	908	0.976616	0.000122046	0.976616
PH_ForcePotential_dblwell_1_05_02.range	PH_ForcePotential_dblwell_1_05_02_range	dynamicalSystem	1606	746	0.976599	0.000122046	0.976599
PH_ForcePotential_dblwell_1_02_01.pcrossdown	PH_ForcePotential_dblwell_1_02_01_pcrossdown	dynamicalSystem	1597	745	0.976597	0.000122046	0.976597
CO_HistogramAMI_even_5.ami5	CO_HistogramAMI_even_5_5	information,correlation,AMI	246	213	0.976568	0.000122046	0.976568
SP_Summaries_pgram_hamm.maxS	SP_Summaries_pgram_hamm_maxS	spectral	4259	908	0.976552	0.000122046	0.976552
SP_Summaries_welch_rect.peakpower_1	SP_Summaries_welch_rect_peakpower_1	spectral	4401	909	0.976542	0.000122046	0.976542
SP_Summaries_fft.peakpower_1	SP_Summaries_fft_peakpower_1	spectral	4525	910	0.976536	0.000122046	0.976536
NL_DVV_3_100_2_50_10_default.rmsDiffSurr	NL_DVV_3_100_2_50_10_default_rmsDiffSurr	delayVectorVariance	1033	646	0.976524	0.000122046	0.976524
SY_SlidingWindow_ent_ent10_1	SY_SlidingWindow_ent_ent10_1	stationarity	623	350	0.976468	0.000122046	0.976468
SB_MotifTwo_median.duuu	SB_MotifTwo_median_duuu	symbolic,motifs	3585	880	-0.976465	0.000122046	0.976465
CO_fzcglscf_2_10	CO_fzcglscf_2_10	correlation,glscf,tau	539	266	0.976447	0.000122046	0.976447
NW_VisibilityGraph_norm.olu90	NW_VisibilityGraph_norm_olu90	network,visibilityGraph	2042	773	-0.976445	0.000122046	0.976445
SY_SlidingWindow_mom3_ent10_2	SY_SlidingWindow_mom3_ent10_2	stationarity	670	397	0.976416	0.000122046	0.976416
PH_Walker_biasprop_01_05.w_ac1	PH_Walker_biasprop_01_05_w_ac1	trend	2621	816	0.976406	0.000122046	0.976406
SB_MotifThree_diffquant.bbaa	SB_MotifThree_diffquant_bbaa	symbolic,motifs	3789	882	0.976397	0.000122046	0.976397
MF_steps_ahead_ar_best_6.rmserr_5	MF_steps_ahead_ar_best_6_rmserr_5	model,prediction,arfit	7040	1012	-0.976374	0.000122046	0.976374
SB_MotifThree_diffquant.bcca	SB_MotifThree_diffquant_bcca	symbolic,motifs	3804	882	0.976365	0.000122046	0.976365
PH_Walker_prop_09.sw_propcross	PH_Walker_prop_09_sw_propcross	trend	2572	813	-0.97633	0.000122046	0.97633
PH_Walker_prop_09.sw_ac1rat	PH_Walker_prop_09_sw_ac1rat	trend	2569	813	-0.976319	0.000122046	0.976319
SY_SlidingWindow_mom3_s10_10	SY_SlidingWindow_mom3_s10_10	stationarity	657	384	0.976294	0.000122046	0.976294
FC_Surprise_T1_100_4_udq_500.tstat	FC_Surprise_T1_100_4_udq_500_tstat	information,symbolic	2399	795	0.976226	0.000122046	0.976226
EN_SampEn_5_01_diff1.sampen3	EN_SampEn_5_01_diff1_sampen3	entropy,sampen,controlen	2736	825	-0.976201	0.000122046	0.976201
FC_Surprise_T2_20_2_udq_500.std	FC_Surprise_T2_20_2_udq_500_std	information,symbolic	2414	797	0.9762	0.000122046	0.9762
IN_AutoMutualInfoStats_diff_20_gaussian.pmaxima	IN_AutoMutualInfoStats_diff_20_gaussian_pmaxima	information,correlation,AMI	401	715	0.976187	0.000122046	0.976187
IN_AutoMutualInfoStats_40_gaussian.ami17	IN_AutoMutualInfoStats_40_gaussian_ami17	information,correlation,AMI	283	713	0.976185	0.000122046	0.976185
MF_GP_LocalPrediction_covSEiso_covNoise_10_3_20_randomgap.meanlogh3	MF_GP_LocalPrediction_covSEiso_covNoise_10_3_20_randomgap_meanlogh3	model,GaussianProcess	6570	987	-0.976177	0.000122046	0.976177
PH_ForcePotential_dblwell_1_02_01.ac10	PH_ForcePotential_dblwell_1_02_01_ac10	dynamicalSystem	1599	745	-0.976166	0.000122046	0.976166
WL_coeffs_db3_4.mean_coeff	WL_coeffs_db3_4_mean_coeff	wavelet	6686	996	0.976098	0.000122046	0.976098
CO_HistogramAMI_std2_2.ami5	CO_HistogramAMI_std2_2_5	information,correlation,AMI	226	209	0.976092	0.000122046	0.976092
NL_crptool_fnn_10_2_1.fnn2	NL_crptool_fnn_10_2_1_fnn2	nonlinear,dimension,crptool	4788	914	-0.976076	0.000122046	0.976076
SB_MotifThree_quantile.ccaa	SB_MotifThree_quantile_ccaa	symbolic,motifs	3705	881	-0.976038	0.000122046	0.976038
FC_Surprise_dist_20_2_q_500.std	FC_Surprise_dist_20_2_q_500_std	information,symbolic	2246	776	0.975974	0.000122046	0.975974
WL_coeffs_db3_5.max_coeff	WL_coeffs_db3_5_max_coeff	wavelet	6697	997	0.975956	0.000122046	0.975956
SY_SlidingWindow_mom3_s5_1	SY_SlidingWindow_mom3_s5_1	stationarity	652	379	0.975939	0.000122046	0.975939
IN_AutoMutualInfoStats_40_kraskov1_4.ami6	IN_AutoMutualInfoStats_40_kraskov1_4_ami6	information,correlation,AMI	327	714	0.975928	0.000122046	0.975928
FC_Surprise_T2_50_3_q_500.uq	FC_Surprise_T2_50_3_q_500_uq	information,symbolic	2317	785	-0.975898	0.000122046	0.975898
FC_Surprise_T2_50_tau_m2quad_500.std	FC_Surprise_T2_50_tau_m2quad_500_std	information,symbolic	2508	809	0.975881	0.000122046	0.975881
FC_Surprise_T1_20_2_udq_500.std	FC_Surprise_T1_20_2_udq_500_std	information,symbolic	2382	793	-0.975878	0.000122046	0.975878
IN_AutoMutualInfoStats_40_kraskov1_4.stdami	IN_AutoMutualInfoStats_40_kraskov1_4_stdami	information,correlation,AMI	363	714	0.975853	0.000122046	0.975853
CO_fzcglscf_1_8	CO_fzcglscf_1_8	correlation,glscf,tau	534	261	0.975786	0.000122046	0.975786
EX_MovingThreshold_01_002.meankickf	EX_MovingThreshold_01_002_meankickf	outliers	3440	872	-0.975736	0.000122046	0.975736
SB_MotifThree_diffquant.baa	SB_MotifThree_diffquant_baa	symbolic,motifs	3734	882	0.975733	0.000122046	0.975733
CO_Embed2_Basic_1.incircle_01	CO_Embed2_Basic_1_incircle_01	correlation	1547	742	0.975692	0.000122046	0.975692
PP_ModelFit_ar_2.rmserrrat_rmgd	PP_ModelFit_ar_2_rmserrrat_rmgd	preprocessing,trend	7004	1010	0.975653	0.000122046	0.975653
MF_GP_hyperparameters_covSEiso_covNoise_1_200_resample.logh2	MF_GP_hyperparameters_covSEiso_covNoise_1_200_resample_logh2	model,GaussianProcess	6460	980	0.97565	0.000122046	0.97565
SP_Summaries_pgram_hamm.mom5	SP_Summaries_pgram_hamm_mom5	spectral	4290	908	0.975635	0.000122046	0.975635
IN_AutoMutualInfoStats_40_gaussian.pcrossq10	IN_AutoMutualInfoStats_40_gaussian_pcrossq10	information,correlation,AMI	319	713	-0.975631	0.000122046	0.975631
CO_HistogramAMI_std1_5.ami5	CO_HistogramAMI_std1_5_5	information,correlation,AMI	216	207	0.975552	0.000122046	0.975552
PP_Compare_medianf3.swms2_2	PP_Compare_medianf3_swms2_2	preprocessing,raw,stationarity	6164	970	-0.975545	0.000122046	0.975545
FC_Surprise_T1_100_5_q_500.std	FC_Surprise_T1_100_5_q_500_std	information,symbolic	2302	783	0.97552	0.000122046	0.97552
SP_Summaries_welch_rect.numPeaks_50power	SP_Summaries_welch_rect_numPeaks_50power	spectral	4400	909	-0.975511	0.000122046	0.975511
SP_Summaries_fft.numPeaks_50power	SP_Summaries_fft_numPeaks_50power	spectral	4524	910	-0.975501	0.000122046	0.975501
PH_Walker_biasprop_05_01.w_median	PH_Walker_biasprop_05_01_w_median	trend	2599	815	0.975497	0.000122046	0.975497
EX_MovingThreshold_01_01.stdkickf	EX_MovingThreshold_01_01_stdkickf	outliers	3428	871	0.975494	0.000122046	0.975494
SB_TransitionMatrix_51.TD3	SB_TransitionMatrix_51_TD3	symbolic,transitionmat	1368	734	0.97549	0.000122046	0.97549
ST_LocalExtrema_n25.medianmax	ST_LocalExtrema_n25_medianmax	distribution,stationarity	3362	868	-0.975489	0.000122046	0.975489
CO_HistogramAMI_even_2.ami4	CO_HistogramAMI_even_2_4	information,correlation,AMI	240	212	0.975465	0.000122046	0.975465
CO_tc3_ac.absnum	CO_tc3_ac_absnum	correlation,nonlinear	1112	706	0.975461	0.000122046	0.975461
CO_RM_AMInformation_7	RM_ami_7	information,correlation,AMI	198	202	0.975432	0.000122046	0.975432
SB_MotifTwo_diff.duuu	SB_MotifTwo_diff_duuu	symbolic,motifs	3522	878	0.975336	0.000122046	0.975336
WL_coeffs_db3_5.med_coeff	WL_coeffs_db3_5_med_coeff	wavelet	6698	997	0.97531	0.000122046	0.97531
SB_MotifTwo_diff.uuud	SB_MotifTwo_diff_uuud	symbolic,motifs	3529	878	0.975307	0.000122046	0.975307
MF_steps_ahead_ar_best_6.mabserr_4	MF_steps_ahead_ar_best_6_mabserr_4	model,prediction,arfit	7038	1012	-0.975288	0.000122046	0.975288
FC_Surprise_T1_100_5_udq_500.min	FC_Surprise_T1_100_5_udq_500_min	information,symbolic	2400	796	0.975254	0.000122046	0.975254
TSTL_localdensity_5_40_ac_fnnmar.taumiden	TSTL_localdensity_5_40_ac_fnnmar_taumiden	nonlinear,tstool	5513	938	0.975245	0.000122046	0.975245
PH_Walker_runningvar_15_50.sw_ansarib_pval	PH_Walker_runningvar_15_50_sw_ansarib_pval	trend	2693	819	0.975242	0.000122046	0.975242
SP_Summaries_pgram_hamm.peakpower_1	SP_Summaries_pgram_hamm_peakpower_1	spectral	4277	908	0.975186	0.000122046	0.975186
SY_SlidingWindow_sampen_ent10_10	SY_SlidingWindow_sampen_ent10_10	stationarity	648	375	-0.975182	0.000122046	0.975182
SY_SlidingWindow_sampen_s10_10	SY_SlidingWindow_sampen_s10_10	stationarity	634	361	-0.975158	0.000122046	0.975158
IN_AutoMutualInfoStats_diff_20_gaussian.pextrema	IN_AutoMutualInfoStats_diff_20_gaussian_pextrema	information,correlation,AMI	399	715	0.975102	0.000122046	0.975102
SB_MotifThree_diffquant.ccbb	SB_MotifThree_diffquant_ccbb	symbolic,motifs	3829	882	0.975099	0.000122046	0.975099
PH_ForcePotential_dblwell_1_02_01.pcrossup	PH_ForcePotential_dblwell_1_02_01_pcrossup	dynamicalSystem	1596	745	0.975089	0.000122046	0.975089
SP_Summaries_fft_logdev.w10_90	SP_Summaries_fft_logdev_w10_90	spectral	4674	911	-0.975072	0.000122046	0.975072
SP_Summaries_fft_logdev.wmax_90	SP_Summaries_fft_logdev_wmax_90	spectral	4671	911	-0.975072	0.000122046	0.975072
CO_RM_AMInformation_8	RM_ami_8	information,correlation,AMI	199	203	0.975057	0.000122046	0.975057
MF_steps_ahead_ss_best_6.rmserr_3	MF_steps_ahead_ss_best_6_rmserr_3	model,prediction	7057	1013	-0.97504	0.000122046	0.97504
SY_SlidingWindow_mom3_s10_2	SY_SlidingWindow_mom3_s10_2	stationarity	656	383	0.975038	0.000122046	0.975038
PH_Walker_prop_11.res_ac1	PH_Walker_prop_11_res_ac1	trend	2597	814	0.975	0.000122046	0.975
SY_SlidingWindow_mom3_sampen2_10	SY_SlidingWindow_mom3_sampen2_10	stationarity	658	385	0.974897	0.000122046	0.974897
WL_dwtcoeff_sym2_5.mind_l5	WL_dwtcoeff_sym2_5_mind_l5	wavelet,dwt	6756	1001	-0.974888	0.000122046	0.974888
SY_VarRatioTest_24682468_00001111.maxstat	SY_VarRatioTest_24682468_00001111_maxstat	vratiotest	7693	1042	0.974886	0.000122046	0.974886
MF_CompareTestSets_y_ar_4_rand_25_01_1.stdrats_iqr	MF_CompareTestSets_y_ar_4_rand_25_01_1_stdrats_iqr	model,prediction,stationarity	7177	1020	-0.974858	0.000122046	0.974858
SB_MotifThree_diffquant.cabb	SB_MotifThree_diffquant_cabb	symbolic,motifs	3811	882	-0.974766	0.000122046	0.974766
SD_SurrogateTest_RP_99.ami_f	SD_SurrogateTest_RP_99_ami_f	surrogate,nonlinearity	7840	1062	-0.974759	0.000122046	0.974759
SB_MotifTwo_diff.ddd	SB_MotifTwo_diff_ddd	symbolic,motifs	3506	878	0.974754	0.000122046	0.974754
MF_steps_ahead_arma_3_1_6.mabserr_4	MF_steps_ahead_arma_3_1_6_mabserr_4	model,prediction	7084	1014	-0.974749	0.000122046	0.974749
WL_dwtcoeff_db3_5.maxd_l5	WL_dwtcoeff_db3_5_maxd_l5	wavelet,dwt	6735	1000	0.974702	0.000122046	0.974702
MF_GP_LocalPrediction_covSEiso_covNoise_5_3_10_beforeafter.stdlogh2	MF_GP_LocalPrediction_covSEiso_covNoise_5_3_10_beforeafter_stdlogh2	model,GaussianProcess	6533	985	-0.974673	0.000122046	0.974673
CO_RM_AMInformation_9	RM_ami_9	information,correlation,AMI	200	204	0.974666	0.000122046	0.974666
PP_ModelFit_ar_2.rmserrrat_p1_20	PP_ModelFit_ar_2_rmserrrat_p1_20	preprocessing,trend	6998	1010	0.974595	0.000122046	0.974595
WL_dwtcoeff_db3_5.mind_l5	WL_dwtcoeff_db3_5_mind_l5	wavelet,dwt	6736	1000	-0.97457	0.000122046	0.97457
SB_MotifThree_diffquant.abaa	SB_MotifThree_diffquant_abaa	symbolic,motifs	3762	882	0.974525	0.000122046	0.974525
PH_ForcePotential_dblwell_1_02_01.range	PH_ForcePotential_dblwell_1_02_01_range	dynamicalSystem	1593	745	0.97449	0.000122046	0.97449
SY_SlidingWindow_mom3_s2_10	SY_SlidingWindow_mom3_s2_10	stationarity	651	378	0.974472	0.000122046	0.974472
FC_Surprise_dist_20_tau_m2quad_500.std	FC_Surprise_dist_20_tau_m2quad_500_std	information,symbolic	2470	804	0.974454	0.000122046	0.974454
CO_HistogramAMI_quantiles_2.ami4	CO_HistogramAMI_quantiles_2_4	information,correlation,AMI	255	215	0.974439	0.000122046	0.974439
FC_Surprise_dist_100_5_q_500.min	FC_Surprise_dist_100_5_q_500_min	information,symbolic	2264	779	-0.974436	0.000122046	0.974436
CO_fzcglscf_1_7	CO_fzcglscf_1_7	correlation,glscf,tau	533	260	0.974426	0.000122046	0.974426
PH_ForcePotential_dblwell_1_05_02.std	PH_ForcePotential_dblwell_1_05_02_std	dynamicalSystem	1616	746	0.974413	0.000122046	0.974413
SP_Summaries_welch_rect.wmax_99	SP_Summaries_welch_rect_wmax_99	spectral	4425	909	-0.974348	0.000122046	0.974348
MF_steps_ahead_ss_best_6.rmserr_6	MF_steps_ahead_ss_best_6_rmserr_6	model,prediction	7066	1013	-0.974343	0.000122046	0.974343
SB_BinaryStats_diff.pstretch1	SB_BinaryStats_diff_pstretch1	distribution,stationarity	3465	875	-0.974336	0.000122046	0.974336
SP_Summaries_fft.wmax_99	SP_Summaries_fft_wmax_99	spectral	4549	910	-0.974329	0.000122046	0.974329
FC_Surprise_T1_50_3_udq_500.uq	FC_Surprise_T1_50_3_udq_500_uq	information,symbolic	2389	794	0.974329	0.000122046	0.974329
SB_MotifTwo_diff.ud	SB_MotifTwo_diff_ud	symbolic,motifs	3503	878	-0.974328	0.000122046	0.974328
WL_dwtcoeff_sym2_5.maxd_l5	WL_dwtcoeff_sym2_5_maxd_l5	wavelet,dwt	6755	1001	0.974315	0.000122046	0.974315
NL_MS_fnn_1_10_mi_5_1.pfnn_1	NL_MS_fnn_1_10_mi_5_1_pfnn_1	nonlinear,fnn,slow	6810	1003	-0.974296	0.000122046	0.974296
CP_ML_StepDetect_l1pwc_02.E	CP_ML_StepDetect_l1pwc_02_E	stepdetection,lengthdep	7793	1054	-0.97422	0.000122046	0.97422
SB_MotifTwo_diff.du	SB_MotifTwo_diff_du	symbolic,motifs	3502	878	-0.974184	0.000122046	0.974184
PH_Walker_biasprop_01_05.sw_maxrat	PH_Walker_biasprop_01_05_sw_maxrat	trend	2631	816	0.974179	0.000122046	0.974179
CO_HistogramAMI_std1_2.ami5	CO_HistogramAMI_std1_2_5	information,correlation,AMI	211	206	0.974131	0.000122046	0.974131
SP_Summaries_fft_logdev.numPeaks_overmean	SP_Summaries_fft_logdev_numPeaks_overmean	spectral	4638	911	-0.974111	0.000122046	0.974111
PP_Compare_medianf3.swss2_2	PP_Compare_medianf3_swss2_2	preprocessing,raw,stationarity	6169	970	-0.974086	0.000122046	0.974086
CO_RM_AMInformation_10	RM_ami_10	information,correlation,AMI	201	205	0.974081	0.000122046	0.974081
SB_MotifThree_diffquant.bccb	SB_MotifThree_diffquant_bccb	symbolic,motifs	3805	882	0.974041	0.000122046	0.974041
PH_Walker_momentum_2.sw_maxrat	PH_Walker_momentum_2_sw_maxrat	trend	2651	817	0.97403	0.000122046	0.97403
SY_VarRatioTest_4_0.stat	SY_VarRatioTest_4_0_stat	vratiotest	7681	1040	0.973998	0.000122046	0.973998
CO_TranslateShape_circle_25_pts.statav3_s	CO_TranslateShape_circle_25_pts_statav3_s	correlation,stationarity	1808	763	0.973962	0.000122046	0.973962
SP_Summaries_welch_rect.mom5	SP_Summaries_welch_rect_mom5	spectral	4414	909	0.973939	0.000122046	0.973939
SP_Summaries_fft.mom5	SP_Summaries_fft_mom5	spectral	4538	910	0.973938	0.000122046	0.973938
NL_embed_PCA_1_10.perc_2	NL_embed_PCA_1_10_perc_2	embedding,pca	6958	1008	0.973864	0.000122046	0.973864
SY_DriftingMean20.max	SY_DriftingMean20_max	stationarity	2159	481	0.97379	0.000122046	0.97379
SY_SpreadRandomLocal_100_100.stdskew	SY_SpreadRandomLocal_100_100_stdskew	stationarity	2137	479	0.973763	0.000122046	0.973763
SP_Summaries_welch_rect.statav2_s	SP_Summaries_welch_rect_statav2_s	spectral	4473	909	0.973722	0.000122046	0.973722
SP_Summaries_fft.statav2_s	SP_Summaries_fft_statav2_s	spectral	4597	910	0.973719	0.000122046	0.973719
SY_SlidingWindow_sampen_sampen10_2	SY_SlidingWindow_sampen_sampen10_2	stationarity	638	365	-0.973713	0.000122046	0.973713
MS_shannon_2t10_3.stdent	MS_shannon_2t10_3_stdent	entropy,mex	6918	686	-0.973707	0.000122046	0.973707
PH_ForcePotential_dblwell_1_02_01.std	PH_ForcePotential_dblwell_1_02_01_std	dynamicalSystem	1603	745	0.973672	0.000122046	0.973672
SP_Summaries_fft_logdev.linfitloglog_hf_a1	SP_Summaries_fft_logdev_linfitloglog_hf_a1	spectral	4701	911	-0.973671	0.000122046	0.973671
MF_FitSubsegments_ss_2_uniform_25_01.fpe_std	MF_FitSubsegments_ss_2_uniform_25_01_fpe_std	model,prediction	7132	1018	-0.973664	0.000122046	0.973664
NL_TSTL_FractalDimensions_5_20_02_1_10_0_32_ac_fnnmar.maxDq	NL_TSTL_FractalDimensions_5_20_02_1_10_0_32_ac_fnnmar_maxDq	nonlinear,tstool,dimension,correlation,stochastic	5456	933	-0.973662	0.000122046	0.973662
FC_LocalSimple_lfit5.swm	FC_LocalSimple_lfit5_swm	forecasting	3122	845	0.973651	0.000122046	0.973651
SB_MotifThree_diffquant.caaa	SB_MotifThree_diffquant_caaa	symbolic,motifs	3807	882	0.973647	0.000122046	0.973647
ST_LocalExtrema_l50.medianmax	ST_LocalExtrema_l50_medianmax	distribution,stationarity	3318	866	-0.973646	0.000122046	0.973646
SY_TISEAN_nstat_z_5_1_3.max	SY_TISEAN_nstat_z_5_1_3_max	nonlinear,tisean,model,stationarity	4932	919	-0.973646	0.000122046	0.973646
SC_FluctAnal_2_range_50_logi.linfitint	SC_FluctAnal_2_range_50_logi_linfitint	scaling	3933	894	0.973589	0.000122046	0.973589
SB_MotifTwo_diff.dddu	SB_MotifTwo_diff_dddu	symbolic,motifs	3516	878	0.973587	0.000122046	0.973587
SP_Summaries_pgram_hamm.statav2_s	SP_Summaries_pgram_hamm_statav2_s	spectral	4349	908	0.973567	0.000122046	0.973567
SY_SlidingWindow_s_s10_1	SY_SlidingWindow_s_s10_1	stationarity	587	314	0.973488	0.000122046	0.973488
SB_MotifThree_diffquant.bbbb	SB_MotifThree_diffquant_bbbb	symbolic,motifs	3793	882	-0.973473	0.000122046	0.973473
FC_Surprise_dist_50_3_q_500.std	FC_Surprise_dist_50_3_q_500_std	information,symbolic	2254	777	0.973473	0.000122046	0.973473
FC_Surprise_T2_100_4_udq_500.mean	FC_Surprise_T2_100_4_udq_500_mean	information,symbolic	2426	799	-0.973467	0.000122046	0.973467
SY_SlidingWindow_s_ent10_1	SY_SlidingWindow_s_ent10_1	stationarity	601	328	0.97346	0.000122046	0.97346
SB_MotifTwo_diff.uddd	SB_MotifTwo_diff_uddd	symbolic,motifs	3523	878	0.973445	0.000122046	0.973445
SB_MotifThree_quantile.bbbb	SB_MotifThree_quantile_bbbb	symbolic,motifs	3673	881	0.973425	0.000122046	0.973425
FC_Surprise_dist_20_2_udq_500.std	FC_Surprise_dist_20_2_udq_500_std	information,symbolic	2350	789	0.973412	0.000122046	0.973412
SP_Summaries_pgram_hamm.numPromPeaks_2	SP_Summaries_pgram_hamm_numPromPeaks_2	spectral	4264	908	0.973282	0.000122046	0.973282
FC_Surprise_T2_100_5_udq_500.std	FC_Surprise_T2_100_5_udq_500_std	information,symbolic	2438	800	-0.973263	0.000122046	0.973263
MF_steps_ahead_ar_2_6.rmserr_4	MF_steps_ahead_ar_2_6_rmserr_4	model,prediction	7014	1011	-0.973241	0.000122046	0.973241
SB_MotifThree_diffquant.ccb	SB_MotifThree_diffquant_ccb	symbolic,motifs	3750	882	0.973231	0.000122046	0.973231
SB_MotifThree_diffquant.bcc	SB_MotifThree_diffquant_bcc	symbolic,motifs	3742	882	0.973231	0.000122046	0.973231
PH_Walker_prop_01.sw_maxrat	PH_Walker_prop_01_sw_maxrat	trend	2531	811	0.97323	0.000122046	0.97323
MF_steps_ahead_ss_best_6.meandiffrmsabs	MF_steps_ahead_ss_best_6_meandiffrmsabs	model,prediction	7069	1013	-0.973229	0.000122046	0.973229
SB_MotifThree_quantile.ccbb	SB_MotifThree_quantile_ccbb	symbolic,motifs	3709	881	0.973171	0.000122046	0.973171
SB_MotifThree_diffquant.bbac	SB_MotifThree_diffquant_bbac	symbolic,motifs	3791	882	-0.973152	0.000122046	0.973152
PP_Compare_rav4.swss10_2	PP_Compare_rav4_swss10_2	preprocessing,raw,stationarity	6328	975	-0.973122	0.000122046	0.973122
SC_FluctAnal_mag_2_dfa_50_2_logi.ssr	SC_FluctAnal_mag_2_dfa_50_2_logi_ssr	scaling	4201	905	0.973107	0.000122046	0.973107
SP_Summaries_fft_logdev.area_2_1	SP_Summaries_fft_logdev_area_2_1	spectral	4716	911	0.973059	0.000122046	0.973059
SB_MotifThree_diffquant.acba	SB_MotifThree_diffquant_acba	symbolic,motifs	3774	882	-0.973056	0.000122046	0.973056
PH_Walker_momentum_2.res_ac1	PH_Walker_momentum_2_res_ac1	trend	2657	817	0.973012	0.000122046	0.973012
WL_dwtcoeff_db3_5.noisestd_l5	WL_dwtcoeff_db3_5_noisestd_l5	wavelet,dwt	6738	1000	0.972981	0.000122046	0.972981
CO_HistogramAMI_quantiles_5.ami5	CO_HistogramAMI_quantiles_5_5	information,correlation,AMI	261	216	0.972978	0.000122046	0.972978
SB_BinaryStats_mean.longstretch1	SB_BinaryStats_mean_longstretch1	distribution,stationarity	3477	876	0.972928	0.000122046	0.972928
FC_Surprise_T1_50_3_udq_500.std	FC_Surprise_T1_50_3_udq_500_std	information,symbolic	2390	794	-0.972925	0.000122046	0.972925
SB_MotifThree_diffquant.ac	SB_MotifThree_diffquant_ac	symbolic,motifs	3717	882	-0.972898	0.000122046	0.972898
SB_MotifTwo_diff.dddd	SB_MotifTwo_diff_dddd	symbolic,motifs	3515	878	0.972897	0.000122046	0.972897
SB_MotifThree_diffquant.ca	SB_MotifThree_diffquant_ca	symbolic,motifs	3721	882	-0.972895	0.000122046	0.972895
SB_BinaryStats_diff.stdstretch1	SB_BinaryStats_diff_stdstretch1	distribution,stationarity	3471	875	0.972894	0.000122046	0.972894
MS_shannon_2_1t10.medent	MS_shannon_2_1t10_medent	entropy,mex	6926	688	-0.972881	0.000122046	0.972881
SD_TSTL_surrogates_1_100_2_tc3.stdsurr	SD_TSTL_surrogates_1_100_2_tc3_stdsurr	nonlinear,tstool,correlation,surrogate	5812	951	-0.972859	0.000122046	0.972859
SC_FluctAnal_2_dfa_50_3_logi.meanssr	SC_FluctAnal_2_dfa_50_3_logi_meanssr	scaling	4134	902	0.972846	0.000122046	0.972846
MF_steps_ahead_arma_3_1_6.mabserr_5	MF_steps_ahead_arma_3_1_6_mabserr_5	model,prediction	7087	1014	-0.972812	0.000122046	0.972812
MF_GP_hyperparameters_covSEiso_covNoise_1_50_random_i.logh2	MF_GP_hyperparameters_covSEiso_covNoise_1_50_random_i_logh2	model,GaussianProcess	6510	984	0.972782	0.000122046	0.972782
PP_Iterate_diff.statav5_lin	PP_Iterate_diff_statav5_lin	preprocessing,raw,stationarity	6440	979	-0.972776	0.000122046	0.972776
MF_steps_ahead_ar_best_6.mabserr_5	MF_steps_ahead_ar_best_6_mabserr_5	model,prediction,arfit	7041	1012	-0.97272	0.000122046	0.97272
SB_MotifThree_quantile.acca	SB_MotifThree_quantile_acca	symbolic,motifs	3657	881	-0.97271	0.000122046	0.97271
PH_Walker_prop_05.sw_ac1rat	PH_Walker_prop_05_sw_ac1rat	trend	2549	812	-0.972698	0.000122046	0.972698
SC_FluctAnal_2_dfa_50_2_logi.se1	SC_FluctAnal_2_dfa_50_2_logi_se1	scaling	4103	901	0.972695	0.000122046	0.972695
SC_FluctAnal_2_dfa_50_2_logi.se2	SC_FluctAnal_2_dfa_50_2_logi_se2	scaling	4104	901	0.972695	0.000122046	0.972695
FC_LocalSimple_lfit4.ac1	FC_LocalSimple_lfit4_ac1	forecasting	3114	844	0.972691	0.000122046	0.972691
SB_BinaryStretch_lseq1	SB_BinaryStretch_lseq1	binary	910	551	0.972685	0.000122046	0.972685
NW_VisibilityGraph_horiz.propmode	NW_VisibilityGraph_horiz_propmode	network,visibilityGraph	1995	772	-0.972667	0.000122046	0.972667
PP_Compare_rav10.swss10_2	PP_Compare_rav10_swss10_2	preprocessing,raw,stationarity	6359	976	-0.972655	0.000122046	0.972655
SP_Summaries_pgram_hamm.wmax_99	SP_Summaries_pgram_hamm_wmax_99	spectral	4301	908	-0.97262	0.000122046	0.97262
SD_TSTL_surrogates_1_100_2_trev.stdsurr	SD_TSTL_surrogates_1_100_2_trev_stdsurr	nonlinear,tstool,correlation,surrogate	5854	957	0.972605	0.000122046	0.972605
PP_Compare_rav3.swss10_2	PP_Compare_rav3_swss10_2	preprocessing,raw,stationarity	6297	974	-0.972601	0.000122046	0.972601
SY_SlidingWindow_ent_s10_1	SY_SlidingWindow_ent_s10_1	stationarity	610	337	0.972558	0.000122046	0.972558
SY_SpreadRandomLocal_50_100.meankurt	SY_SpreadRandomLocal_50_100_meankurt	stationarity	2114	478	-0.972505	0.000122046	0.972505
PP_Compare_medianf10.swss10_2	PP_Compare_medianf10_swss10_2	preprocessing,raw,stationarity	6235	972	-0.97247	0.000122046	0.97247
CO_fzcglscf_1_6	CO_fzcglscf_1_6	correlation,glscf,tau	532	259	0.972463	0.000122046	0.972463
IN_AutoMutualInfoStats_40_gaussian.ami36	IN_AutoMutualInfoStats_40_gaussian_ami36	information,correlation,AMI	302	713	0.972424	0.000122046	0.972424
SB_MotifThree_diffquant.aa	SB_MotifThree_diffquant_aa	symbolic,motifs	3715	882	0.972331	0.000122046	0.972331
SB_MotifThree_diffquant.caca	SB_MotifThree_diffquant_caca	symbolic,motifs	3813	882	-0.972312	0.000122046	0.972312
IN_AutoMutualInfoStats_40_kraskov1_4.ami7	IN_AutoMutualInfoStats_40_kraskov1_4_ami7	information,correlation,AMI	328	714	0.972311	0.000122046	0.972311
SB_MotifThree_quantile.acac	SB_MotifThree_quantile_acac	symbolic,motifs	3653	881	-0.97231	0.000122046	0.97231
FC_Surprise_T1_100_4_udq_500.min	FC_Surprise_T1_100_4_udq_500_min	information,symbolic	2392	795	0.972305	0.000122046	0.972305
AC_nl_66	AC_nl_66	correlation,nonlinearautocorr	157	161	0.97225	0.000122046	0.97225
NL_TSTL_ReturnTime_005_1_005_n1_1_3.pzeros	NL_TSTL_ReturnTime_005_1_005_n1_1_3_pzeros	nonlinear,tstool	5780	948	0.972238	0.000122046	0.972238
AC_5	AC_5	correlation	97	96	0.972235	0.000122046	0.972235
IN_AutoMutualInfoStats_40_gaussian.ami37	IN_AutoMutualInfoStats_40_gaussian_ami37	information,correlation,AMI	303	713	0.972216	0.000122046	0.972216
SB_MotifTwo_diff.uuu	SB_MotifTwo_diff_uuu	symbolic,motifs	3513	878	0.972177	0.000122046	0.972177
CO_Embed2_AngleTau_50.ac1_thetaac3	CO_Embed2_AngleTau_50_ac1_thetaac3	correlation,embedding	1942	768	-0.972136	0.000122046	0.972136
SP_Summaries_fft_logdev.linfitloglog_mf_a1	SP_Summaries_fft_logdev_linfitloglog_mf_a1	spectral	4706	911	-0.972134	0.000122046	0.972134
SB_MotifThree_quantile.caac	SB_MotifThree_quantile_caac	symbolic,motifs	3689	881	-0.972109	0.000122046	0.972109
SB_BinaryStats_diff.longstretch1	SB_BinaryStats_diff_longstretch1	distribution,stationarity	3466	875	0.972076	0.000122046	0.972076
SB_MotifTwo_diff.udud	SB_MotifTwo_diff_udud	symbolic,motifs	3525	878	-0.971964	0.000122046	0.971964
SB_MotifThree_quantile.caca	SB_MotifThree_quantile_caca	symbolic,motifs	3693	881	-0.971935	0.000122046	0.971935
PH_Walker_prop_11.sw_propcross	PH_Walker_prop_11_sw_propcross	trend	2592	814	-0.971905	0.000122046	0.971905
MF_GP_hyperparameters_covSEiso_covNoise_1_50_random_i.h1	MF_GP_hyperparameters_covSEiso_covNoise_1_50_random_i_h1	model,GaussianProcess	6507	984	-0.971889	0.000122046	0.971889
NL_TSTL_FractalDimensions_5_20_02_1_10_0_32_ac_fnnmar.linfit_b	NL_TSTL_FractalDimensions_5_20_02_1_10_0_32_ac_fnnmar_linfit_b	nonlinear,tstool,dimension,correlation,stochastic	5462	933	-0.971785	0.000122046	0.971785
SB_MotifThree_diffquant.aaac	SB_MotifThree_diffquant_aaac	symbolic,motifs	3755	882	0.971754	0.000122046	0.971754
FC_Surprise_T2_100_5_udq_500.max	FC_Surprise_T2_100_5_udq_500_max	information,symbolic	2433	800	-0.971737	0.000122046	0.971737
SB_MotifThree_diffquant.acac	SB_MotifThree_diffquant_acac	symbolic,motifs	3773	882	-0.971697	0.000122046	0.971697
CP_l1pwc_sweep_lambda_0_005_095.rmserrsu01	CP_l1pwc_sweep_lambda_0_005_095_rmserrsu01	stepdetection	7808	1055	0.971683	0.000122046	0.971683
MF_CompareTestSets_y_ss_2_uniform_25_01_1.meandiffs_std	MF_CompareTestSets_y_ss_2_uniform_25_01_1_meandiffs_std	model,prediction,stationarity	7232	1023	-0.971682	0.000122046	0.971682
SY_SlidingWindow_sampen_s10_2	SY_SlidingWindow_sampen_s10_2	stationarity	633	360	-0.971649	0.000122046	0.971649
PH_Walker_prop_01.w_std	PH_Walker_prop_01_w_std	trend	2520	811	0.971637	0.000122046	0.971637
FC_Surprise_T2_100_tau_m2quad_500.std	FC_Surprise_T2_100_tau_m2quad_500_std	information,symbolic	2516	810	0.971544	0.000122046	0.971544
MF_steps_ahead_ss_best_6.mabserr_6	MF_steps_ahead_ss_best_6_mabserr_6	model,prediction	7067	1013	-0.971514	0.000122046	0.971514
SB_MotifThree_diffquant.abca	SB_MotifThree_diffquant_abca	symbolic,motifs	3768	882	-0.971421	0.000122046	0.971421
FC_Surprise_T1_100_4_udq_500.std	FC_Surprise_T1_100_4_udq_500_std	information,symbolic	2398	795	-0.971417	0.000122046	0.971417
NW_VisibilityGraph_norm.maxk	NW_VisibilityGraph_norm_maxk	network,visibilityGraph	2036	773	0.971408	0.000122046	0.971408
PH_ForcePotential_sine_1_1_1.range	PH_ForcePotential_sine_1_1_1_range	dynamicalSystem	1656	750	0.971393	0.000122046	0.971393
NW_VisibilityGraph_norm.kac2	NW_VisibilityGraph_norm_kac2	network,visibilityGraph	2065	773	0.971382	0.000122046	0.971382
MF_FitSubsegments_arma_2_2_uniform_25_01.fpe_range	MF_FitSubsegments_arma_2_2_uniform_25_01_fpe_range	model,prediction	7141	1019	-0.971358	0.000122046	0.971358
DN_RemovePoints_absclose_05.ac2rat	DN_RemovePoints_absclose_05_ac2rat	correlation,outliers	1688	753	-0.971354	0.000122046	0.971354
MF_FitSubsegments_arma_2_2_uniform_25_01.q_1_min	MF_FitSubsegments_arma_2_2_uniform_25_01_q_1_min	model,prediction	7153	1019	0.971294	0.000122046	0.971294
MF_CompareTestSets_y_ss_2_uniform_25_01_1.meandiffs_mean	MF_CompareTestSets_y_ss_2_uniform_25_01_1_meandiffs_mean	model,prediction,stationarity	7230	1023	-0.971232	0.000122046	0.971232
CO_Embed2_Basic_1.parabup01	CO_Embed2_Basic_1_parabup01	correlation	1532	742	0.971188	0.000122046	0.971188
TSTL_localdensity_5_40_ac_fnnmar.ac2den	TSTL_localdensity_5_40_ac_fnnmar_ac2den	nonlinear,tstool	5508	938	0.971185	0.000122046	0.971185
SD_SurrogateTest_RP_99.ami_mediqr	SD_SurrogateTest_RP_99_ami_mediqr	surrogate,nonlinearity	7841	1062	0.971165	0.000122046	0.971165
MF_FitSubsegments_ar_2_uniform_25_01.fpe_range	MF_FitSubsegments_ar_2_uniform_25_01_fpe_range	model,prediction	7123	1017	-0.971005	0.000122046	0.971005
PH_Walker_biasprop_01_05.sw_ac1rat	PH_Walker_biasprop_01_05_sw_ac1rat	trend	2629	816	-0.970998	0.000122046	0.970998
PH_Walker_biasprop_05_01.sw_ac1rat	PH_Walker_biasprop_05_01_sw_ac1rat	trend	2609	815	-0.970988	0.000122046	0.970988
NL_TSTL_acp_1_001_025_10_05.iqracpf_10	NL_TSTL_acp_1_001_025_10_05_iqracpf_10	nonlinear,correlation	5181	925	0.970982	0.000122046	0.970982
SB_MotifThree_diffquant.cc	SB_MotifThree_diffquant_cc	symbolic,motifs	3723	882	0.970911	0.000122046	0.970911
PH_ForcePotential_dblwell_1_05_02.ac1	PH_ForcePotential_dblwell_1_05_02_ac1	dynamicalSystem	1611	746	-0.970895	0.000122046	0.970895
SB_MotifTwo_diff.dudu	SB_MotifTwo_diff_dudu	symbolic,motifs	3520	878	-0.970853	0.000122046	0.970853
NW_VisibilityGraph_norm.rangek	NW_VisibilityGraph_norm_rangek	network,visibilityGraph	2038	773	0.970834	0.000122046	0.970834
CO_tc3_3.absnum	CO_tc3_3_absnum	correlation,nonlinear	1107	705	0.97078	0.000122046	0.97078
NL_crptool_fnn_10_2_1.fnn8	NL_crptool_fnn_10_2_1_fnn8	nonlinear,dimension,crptool	4794	914	-0.970738	0.000122046	0.970738
IN_AutoMutualInfoStats_40_gaussian.ami38	IN_AutoMutualInfoStats_40_gaussian_ami38	information,correlation,AMI	304	713	0.970695	0.000122046	0.970695
SP_Summaries_fft_logdev.wmax_95	SP_Summaries_fft_logdev_wmax_95	spectral	4672	911	-0.970686	0.000122046	0.970686
PH_Walker_runningvar_15_50.sw_ac1rat	PH_Walker_runningvar_15_50_sw_ac1rat	trend	2689	819	-0.97068	0.000122046	0.97068
CO_FirstMin_mi-hist_10	firstMin_mi-hist_10	correlation,AMI	206	139	0.97068	0.000122046	0.97068
FC_LocalSimple_median7.stderr	FC_LocalSimple_median7_stderr	forecasting	3081	841	-0.970665	0.000122046	0.970665
PH_Walker_momentum_2.sw_ac1rat	PH_Walker_momentum_2_sw_ac1rat	trend	2649	817	-0.970632	0.000122046	0.970632
NL_TSTL_acp_1_001_025_10_05.iqracpf_9	NL_TSTL_acp_1_001_025_10_05_iqracpf_9	nonlinear,correlation	5177	925	0.970609	0.000122046	0.970609
CO_TranslateShape_circle_15_pts.statav4_s	CO_TranslateShape_circle_15_pts_statav4_s	correlation,stationarity	1794	762	0.97057	0.000122046	0.97057
MF_CompareTestSets_y_ss_2_uniform_25_01_1.meandiffs_median	MF_CompareTestSets_y_ss_2_uniform_25_01_1_meandiffs_median	model,prediction,stationarity	7231	1023	-0.970549	0.000122046	0.970549
MF_armax_1_1_05_1.maxdc	MF_armax_1_1_05_1_maxdc	model	7432	1031	-0.970531	0.000122046	0.970531
IN_AutoMutualInfoStats_40_gaussian.ami35	IN_AutoMutualInfoStats_40_gaussian_ami35	information,correlation,AMI	301	713	0.970516	0.000122046	0.970516
NL_TSTL_ReturnTime_005_1_005_n1_1_3.phisthistmin	NL_TSTL_ReturnTime_005_1_005_n1_1_3_phisthistmin	nonlinear,tstool	5794	948	0.970514	0.000122046	0.970514
MF_CompareTestSets_y_ss_2_uniform_25_01_1.meandiffs_iqr	MF_CompareTestSets_y_ss_2_uniform_25_01_1_meandiffs_iqr	model,prediction,stationarity	7233	1023	-0.970474	0.000122046	0.970474
FC_Surprise_T1_50_3_udq_500.min	FC_Surprise_T1_50_3_udq_500_min	information,symbolic	2384	794	0.970431	0.000122046	0.970431
CO_fzcglscf_1_5	CO_fzcglscf_1_5	correlation,glscf,tau	531	258	0.970396	0.000122046	0.970396
MF_armax_1_1_05_1.maxda	MF_armax_1_1_05_1_maxda	model	7431	1031	-0.970326	0.000122046	0.970326
MF_steps_ahead_ar_best_6.meandiffrmsabs	MF_steps_ahead_ar_best_6_meandiffrmsabs	model,prediction,arfit	7046	1012	-0.970305	0.000122046	0.970305
NL_TSTL_acp_1_001_025_10_05.iqracpf_8	NL_TSTL_acp_1_001_025_10_05_iqracpf_8	nonlinear,correlation	5173	925	0.9703	0.000122046	0.9703
NL_TSTL_ReturnTime_10_1_1_n1_ac_8.pzeros	NL_TSTL_ReturnTime_10_1_1_n1_ac_8_pzeros	nonlinear,tstool	5744	946	0.970284	0.000122046	0.970284
SB_MotifThree_diffquant.aca	SB_MotifThree_diffquant_aca	symbolic,motifs	3731	882	-0.970198	0.000122046	0.970198
PP_Compare_rav4.swss10_1	PP_Compare_rav4_swss10_1	preprocessing,raw,stationarity	6327	975	-0.970195	0.000122046	0.970195
FC_Surprise_T2_100_tau_m2quad_500.min	FC_Surprise_T2_100_tau_m2quad_500_min	information,symbolic	2510	810	-0.970136	0.000122046	0.970136
PH_Walker_biasprop_05_01.w_ac2	PH_Walker_biasprop_05_01_w_ac2	trend	2602	815	0.970128	0.000122046	0.970128
PH_Walker_prop_01.sw_ac1rat	PH_Walker_prop_01_sw_ac1rat	trend	2529	811	-0.970085	0.000122046	0.970085
SB_MotifThree_diffquant.ccca	SB_MotifThree_diffquant_ccca	symbolic,motifs	3831	882	0.970064	0.000122046	0.970064
[truncated: 4,442 more rows]

## Sheet: description
code name	description(obtained from hctsa manual: https://hctsa-users.gitbook.io/hctsa-manual/list-of-included-code-files)
DN_Burstiness	Burstiness statistic of a time series.
DN_CompareKSFit	Fits a distribution to data.
DN_CustomSkewness	Custom skewness measures.
DN_FitKernelSmooth	Statistics of a kernel-smoothed distribution of the data.
DN_Fit_mle	Maximum likelihood distribution fit to data.
DN_HighLowMu	The highlowmu statistic.
DN_HistogramMode	Mode of a data vector.
DN_Mean	A given measure of location of a data vector.
DN_MinMax	The maximum and minimum values of the input data vector
DN_Moments	A moment of the distribution of the input time series.
DN_OutlierInclude	How statistics depend on distributional outliers.
DN_OutlierTest	How distributional statistics depend on distributional outliers.
DN_ProportionValues	Proportion of values in a time-series vector.
DN_Quantile	Quantiles of the distribution of values in the time series data vector.
DN_RemovePoints	How time-series properties change as points are removed.
DN_SimpleFit	Fit distributions or simple time-series models to the data.
DN_Spread	Measure of spread of the input time series.
DN_TrimmedMean	Mean of the trimmed time series using trimmean.
DN_Unique	The proportion of the time series that are unique values.
DN_Withinp	Proportion of data points within p standard deviations of the mean.
DN_cv	Coefficient of variation.
DN_pleft	Distance from the mean at which a given proportion of data are more distant.
EN_DistributionEntropy	Distributional entropy.
HT_DistributionTest	Hypothesis test for distributional fits to a data vector.
CO_AddNoise	Changes in the automutual information with the addition of noise.
CO_AutoCorr	Compute the autocorrelation of an input time series.
CO_AutoCorrShape	How the autocorrelation function changes with the time lag.
CO_Embed2	Statistics of the time series in a 2-dimensional embedding space.
CO_Embed2_AngleTau	Angle autocorrelation in a 2-dimensional embedding space.
CO_Embed2_Basic	Point density statistics in a 2-d embedding space.
CO_Embed2_Dist	Analyzes distances in a 2-d embedding space of a time series.
CO_Embed2_Shapes	Shape-based statistics in a 2-d embedding space.
CO_FirstMin	Time of first minimum in a given correlation function.
CO_FirstZero	The first zero-crossing of a given autocorrelation function.
CO_NonlinearAutocorr	A custom nonlinear autocorrelation of a time series.
CO_StickAngles	Analysis of line-of-sight angles between time-series data points.
CO_TranslateShape	Statistics on datapoints inside geometric shapes across the time series.
CO_f1ecac	The 1/e correlation length.
CO_fzcglscf	The first zero-crossing of the generalized self-correlation function.
CO_glscf	The generalized linear self-correlation function of a time series.
CO_tc3	Normalized nonlinear autocorrelation function, tc3.
CO_trev	Normalized nonlinear autocorrelation, trev function of a time series.
DK_crinkle	Computes James Theiler's crinkle statistic.
DK_theilerQ	Computes Theiler's Q statistic.
DK_timerev	Time reversal asymmetry statistic.
NL_embed_PCA	Principal Components analysis of a time series in an embedding space.
CO_RM_AMInformation	Automutual information (Rudy Moddemeijer implementation).
CO_CompareMinAMI	Variability in first minimum of automutual information.
CO_HistogramAMI	The automutual information of the distribution using histograms.
IN_AutoMutualInfoStats	Statistics on automutual information function for a time series.
EN_ApEn	Approximate Entropy of a time series.
EN_CID	Simple complexity measure of a time series.
EN_MS_LZcomplexity	Lempel-Ziv complexity of a n-bit encoding of a time series.
EN_MS_shannon	Approximate Shannon entropy of a time series.
EN_PermEn	Permutation Entropy of a time series.
EN_RM_entropy	Entropy of a time series using Rudy Moddemeijer's code.
EN_Randomize	How time-series properties change with increasing randomization.
EN_SampEn	Sample Entropy of a time series.
EN_mse	Multiscale entropy of a time series.
EN_rpde	Recurrence period density entropy (RPDE).
EN_wentropy	Entropy of time series using wavelets.
MF_ARMA_orders	Compares a range of ARMA models fitted to a time series.
MF_AR_arcov	Fits an AR model of a given order, p.
MF_CompareAR	Compares model fits of various orders to a time series.
MF_CompareTestSets	Robustness of test-set goodness of fit.
MF_ExpSmoothing	Exponential smoothing time-series prediction model.
MF_FitSubsegments	Robustness of model parameters across different segments of a time series.
MF_GARCHcompare	Comparison of GARCH time-series models.
MF_GARCHfit	GARCH time-series modeling.
MF_GP_FitAcross	Gaussian Process time-series modeling for local prediction.
MF_GP_LocalPrediction	Gaussian Process time-series model for local prediction.
MF_GP_hyperparameters	Gaussian Process time-series model parameters and goodness of fit.
MF_StateSpaceCompOrder	Change in goodness of fit across different state space models.
MF_StateSpace_n4sid	State space time-series model fitting.
MF_arfit	Statistics of a fitted AR model to a time series.
MF_armax	Statistics on a fitted ARMA model.
MF_hmm_CompareNStates	Hidden Markov Model (HMM) fitting to a time series.
MF_hmm_fit	Fits a Hidden Markov Model to sequential data.
MF_steps_ahead	Goodness of model predictions across prediction lengths.
FC_LocalSimple	Simple local time-series forecasting.
FC_LoopLocalSimple	How simple local forecasting depends on window length.
FC_Surprise	How surprised you would be of the next data point given recent memory.
PP_ModelFit	Investigates whether AR model fit improves with different preprocessings.
SY_DriftingMean	Mean and variance in local time-series subsegments.
SY_DynWin	How stationarity estimates depend on the number of time-series subsegments.
SY_KPSStest	The KPSS stationarity test.
SY_LocalDistributions	Compares the distribution in consecutive time-series segments.
SY_LocalGlobal	Compares local statistics to global statistics of a time series.
SY_PPtest	Phillips-Peron unit root test.
SY_RangeEvolve	How the time-series range changes across time.
SY_SlidingWindow	Sliding window measures of stationarity.
SY_SpreadRandomLocal	Bootstrap-based stationarity measure.
SY_StatAv	Simple mean-stationarity metric, StatAv.
SY_StdNthDer	Standard deviation of the nth derivative of the time series.
SY_StdNthDerChange	How the output of SY_StdNthDer changes with order parameter.
SY_TISEAN_nstat_z	Cross-forecast errors of zeroth-order time-series models.
SY_VarRatioTest	Variance ratio test for random walk.
CP_ML_StepDetect	Analysis of discrete steps in a time series.
CP_l1pwc_sweep_lambda	Dependence of step detection on regularization parameter.
CP_wavelet_varchg	Variance change points in a time series.
NL_BoxCorrDim	Correlation dimension of a time series.
NL_DVV	Delay Vector Variance method for real and complex signals.
NL_MS_fnn	False nearest neighbors of a time series.
NL_MS_nlpe	Normalized drop-one-out constant interpolation nonlinear prediction error.
NL_TISEAN_c1	Information dimension.
NL_TISEAN_d2	d2 routine from the TISEAN package.
NL_TISEAN_fnn	False nearest neighbors of a time series.
NL_TSTL_FractalDimensions	Fractal dimension spectrum, D(q), of a time series.
NL_TSTL_GPCorrSum	Correlation sum scaling by Grassberger-Proccacia algorithm.
NL_TSTL_LargestLyap	Largest Lyapunov exponent of a time series.
NL_TSTL_PoincareSection	Poincare sectino analysis of a time series.
NL_TSTL_ReturnTime	Analysis of the histogram of return times.
NL_TSTL_TakensEstimator	Taken's estimator for correlation dimension.
NL_TSTL_acp	acp function in TSTOOL
NL_TSTL_dimensions	Box counting, information, and correlation dimension of a time series.
NL_crptool_fnn	Analyzes the false-nearest neighbors statistic.
SD_SurrogateTest	Analyzes test statistics obtained from surrogate time series.
SD_TSTL_surrogates	Surrogate time-series analysis.
TSTL_delaytime	Optimal delay time using the method of Parlitz and Wichard.
TSTL_localdensity	Local density estimates in the time-delay embedding space.
SC_MMA	Physionet implementation of multiscale multifractal analysis
SC_fastdfa	Matlab wrapper for Max Little's ML_fastdfa code
SC_FluctAnal	Implements fluctuation analysis by a variety of methods.
SP_Summaries	Statistics of the power spectrum of a time series.
DT_IsSeasonal	A simple test of seasonality.
PD_PeriodicityWang	Periodicity extraction measure of Wang et al.
WL_DetailCoeffs	Detail coefficients of a wavelet decomposition.
WL_coeffs	Wavelet decomposition of the time series.
WL_cwt	Continuous wavelet transform of a time series.
WL_dwtcoeff	Discrete wavelet transform coefficients.
WL_fBM	Parameters of fractional Gaussian noise/Brownian motion in a time series.
WL_scal2frq	Frequency components in a periodic time series.
SB_BinaryStats	Statistics on a binary symbolization of the time series.
SB_BinaryStretch	Characterizes stretches of 0/1 in time-series binarization.
SB_MotifThree	Motifs in a coarse-graining of a time series to a 3-letter alphabet.
SB_MotifTwo	Local motifs in a binary symbolization of the time series.
SB_TransitionMatrix	Transition probabilities between different time-series states.
SB_TransitionpAlphabet	How transition probabilities change with alphabet size.
MD_hrv_classic	Classic heart rate variability (HRV) statistics.
MD_pNN	pNNx measures of heart rate variability.
MD_polvar	The POLVARd measure of a time series.
MD_rawHRVmeas	Heart rate variability (HRV) measures of a time series.
SY_Trend	Quantifies various measures of trend in a time series.
ST_FitPolynomial	Goodness of a polynomial fit to a time series.
ST_Length	Length of an input data vector.
ST_LocalExtrema	How local maximums and minimums vary across the time series.
ST_MomentCorr	Correlations between simple statistics in local windows of a time series.
ST_SimpleStats	Basic statistics about an input time series.
EX_MovingThreshold	Moving threshold model for extreme events in a time series.
HT_HypothesisTest	Statistical hypothesis test applied to a time series.
NW_VisibilityGraph	Visibility graph analysis of a time series.
PH_ForcePotential	Couples the values of the time series to a dynamical system.
PH_Walker	Simulates a hypothetical walker moving through the time domain.
PP_Compare	Compare how time-series properties change after pre-processing.
PP_Iterate	How time-series properties change in response to iterative pre-processing.
