# Supplementary material for: Topographic gradients of intrinsic dynamics across neocortex
Source: eLife. 2020 Dec 17;9:e62116. doi: 10.7554/eLife.62116 (PMC7771969; doi:10.7554/eLife.62116)
Supplement: Supplementary file 4. — The complete list of features (ranked by loading), their definitions, correlations and p-values for PC2 is presented in machine-readable format. [file elife-62116-supp4.xls]

## Sheet: pc2_rankedFeatList
CodeString	Name	Keywords	ID	MasterID	loading	correctedPval	absoluteLoading
EN_rpde_3_ac.H	EN_rpde_3_ac_H	entropy	863	512	-0.962734	0.000419841	0.962734
EN_rpde_3_ac.H_norm	EN_rpde_3_ac_H_norm	entropy	864	512	-0.947261	0.000419841	0.947261
CO_Embed2_Shapes_tau_circle_1.median	CO_Embed2_Shapes_tau_circle_1_median	correlation,embedding	1985	771	-0.940334	0.000419841	0.940334
CO_Embed2_Shapes_tau_circle_1.mean	CO_Embed2_Shapes_tau_circle_1_mean	correlation,embedding	1986	771	-0.939367	0.000419841	0.939367
TSTL_delaytime_01_1.tau1	TSTL_delaytime_01_1_tau1	nonlinear,correlation,tstool,tau	5322	931	0.937205	0.000419841	0.937205
TSTL_delaytime_01_1.mintau	TSTL_delaytime_01_1_mintau	nonlinear,correlation,tstool,tau	5329	931	0.93544	0.000419841	0.93544
TSTL_localdensity_5_40_ac_2.medianden	TSTL_localdensity_5_40_ac_2_medianden	nonlinear,tstool	5520	939	0.925556	0.000419841	0.925556
EN_rpde_3_ac.meanNonZero	EN_rpde_3_ac_meanNonZero	entropy	866	512	0.922777	0.000419841	0.922777
CO_Embed2_Shapes_tau_circle_1.max	CO_Embed2_Shapes_tau_circle_1_max	correlation,embedding	1983	771	-0.921703	0.000419841	0.921703
CO_Embed2_Shapes_tau_circle_1.std	CO_Embed2_Shapes_tau_circle_1_std	correlation,embedding	1984	771	-0.919342	0.000419841	0.919342
CO_Embed2_tau.eucds5	CO_Embed2_tau_eucds5	correlation,embedding	1932	767	-0.917188	0.000419841	0.917188
EN_rpde_3_ac.propNonZero	EN_rpde_3_ac_propNonZero	entropy	865	512	-0.916584	0.000419841	0.916584
DN_SimpleFit_exp1_hsqrt.rmse	DN_SimpleFit_exp1_rmse_hsqrt	distribution,gof,exp1	3164	852	-0.907206	0.000419841	0.907206
NL_TSTL_GPCorrSum2_n1_05_40_20_ac_fnnmar.robfit_sea1	NL_TSTL_GPCorrSum2_n1_05_40_20_ac_fnnmar_robfit_sea1	nonlinear,correlation,tstool,stochastic	5271	927	-0.90607	0.000419841	0.90607
CO_Embed2_Shapes_tau_circle_1.iqr	CO_Embed2_Shapes_tau_circle_1_iqr	correlation,embedding	1987	771	-0.904718	0.000419841	0.904718
NL_TSTL_LargestLyap_n1_01_001_3_1_4.expfit_r2	NL_TSTL_LargestLyap_n1_01_001_3_1_4_expfit_r2	nonlinear,tstool	5740	945	0.903143	0.000419841	0.903143
CO_Embed2_tau.mean_eucdm	CO_Embed2_tau_mean_eucdm	correlation,embedding,stationarity	1927	767	0.901991	0.000419841	0.901991
EN_DistributionEntropy_ks__02	EN_DistributionEntropy_ks__02	entropy	882	523	-0.901944	0.000419841	0.901944
DN_OutlierInclude_abs_001.nfexpa	DN_OutlierInclude_abs_001_nfexpa	distribution,outliers	3223	863	0.901393	0.000419841	0.901393
NL_TSTL_dimensions_50_ac_fnnmar.co_lfitmeansqdev3	NL_TSTL_dimensions_50_ac_fnnmar_co_lfitmeansqdev3	nonlinear,tstool,scaling,dimension	5373	932	0.900438	0.000419841	0.900438
DN_pleft_05	DN_pleft05	distribution,spread	62	59	0.900012	0.000419841	0.900012
DN_OutlierInclude_abs_001.nfexpc	DN_OutlierInclude_abs_001_nfexpc	distribution,outliers	3225	863	-0.899048	0.000419841	0.899048
CO_Embed2_Basic_tau.downdiag05	CO_Embed2_Basic_tau_downdiag05	correlation	1558	743	-0.898983	0.000419841	0.898983
DN_RemovePoints_absclose_05.std	DN_RemovePoints_absclose_05_std	correlation,outliers	1695	753	-0.897897	0.000419841	0.897897
DN_OutlierTest10.std	DN_OutlierTest10_std	spread,distribution,outliers	1046	649	0.897405	0.000419841	0.897405
DN_Withinp_05	DN_Withinp_05	distribution,spread	45	42	-0.897326	0.000419841	0.897326
DN_OutlierInclude_abs_001.nflb	DN_OutlierInclude_abs_001_nflb	distribution,outliers	3229	863	0.897187	0.000419841	0.897187
NL_TSTL_GPCorrSum2_n1_05_40_20_ac_fnnmar.robfit_s	NL_TSTL_GPCorrSum2_n1_05_40_20_ac_fnnmar_robfit_s	nonlinear,correlation,tstool,stochastic	5270	927	-0.897133	0.000419841	0.897133
EN_DistributionEntropy_hist_auto_02	EN_DistributionEntropy_hist_auto_02	entropy	908	549	-0.896746	0.000419841	0.896746
DN_CompareKSFit_norm.olapint	DN_CompareKSFit_norm_olapint	distribution,ksdensity,raw	3176	854	-0.89618	0.000419841	0.89618
EN_DistributionEntropy_ks__03	EN_DistributionEntropy_ks__03	entropy	883	524	-0.896154	0.000419841	0.896154
CO_Embed2_Basic_tau.medianincircle	CO_Embed2_Basic_tau_medianincircle	correlation	1582	743	-0.895954	0.000419841	0.895954
DN_OutlierInclude_abs_001.nfexpb	DN_OutlierInclude_abs_001_nfexpb	distribution,outliers	3224	863	0.895913	0.000419841	0.895913
DN_OutlierInclude_abs_001.nfla	DN_OutlierInclude_abs_001_nfla	distribution,outliers	3228	863	-0.895837	0.000419841	0.895837
DN_CompareKSFit_gamma.olapint	DN_CompareKSFit_gamma_olapint	distribution,ksdensity,raw,posOnly	3206	860	-0.895792	0.000419841	0.895792
NL_BoxCorrDim_50_ac_5.meanchr5	NL_BoxCorrDim_50_ac_5_meanchr5	nonlinear,correlation,tstool,dimension	5209	926	-0.895714	0.000419841	0.895714
SP_Summaries_fft_logdev.mom3	SP_Summaries_fft_logdev_mom3	spectral	4660	911	-0.895563	0.000419841	0.895563
EN_wentropy_shannon	EN_wentropy_shannon	entropy	856	509	0.895465	0.000419841	0.895465
DN_pleft_04	DN_pleft04	distribution,spread	61	58	0.895418	0.000419841	0.895418
EN_DistributionEntropy_hist_auto_03	EN_DistributionEntropy_hist_auto_03	entropy	909	550	-0.895361	0.000419841	0.895361
DN_Withinp_median_10	DN_Withinp_median_10	distribution,spread	52	49	0.89534	0.000419841	0.89534
NL_TSTL_GPCorrSum2_n1_05_100_20_ac_fnnmar.robfit_sea1	NL_TSTL_GPCorrSum2_n1_05_100_20_ac_fnnmar_robfit_sea1	nonlinear,correlation,tstool,stochastic	5285	928	-0.895282	0.000419841	0.895282
DN_CompareKSFit_logn.olapint	DN_CompareKSFit_logn_olapint	distribution,ksdensity,raw,posOnly	3211	861	-0.894976	0.000419841	0.894976
NL_BoxCorrDim_50_ac_5.meanchr6	NL_BoxCorrDim_50_ac_5_meanchr6	nonlinear,correlation,tstool,dimension	5213	926	-0.894902	0.000419841	0.894902
CO_Embed2_Basic_tau.incircle_05	CO_Embed2_Basic_tau_incircle_05	correlation	1578	743	-0.894678	0.000419841	0.894678
SP_Summaries_fft_logdev.ylogareatopeak	SP_Summaries_fft_logdev_ylogareatopeak	spectral	4690	911	-0.894663	0.000419841	0.894663
EN_wentropy_logenent	EN_wentropy_logenent	entropy	857	510	0.894469	0.000419841	0.894469
SP_Summaries_fft_logdev.mom4	SP_Summaries_fft_logdev_mom4	spectral	4661	911	-0.894308	0.000419841	0.894308
SP_Summaries_fft_logdev.maxS	SP_Summaries_fft_logdev_maxS	spectral	4631	911	-0.894198	0.000419841	0.894198
SP_Summaries_fft_logdev.areatopeak	SP_Summaries_fft_logdev_areatopeak	spectral	4689	911	-0.894198	0.000419841	0.894198
NL_TSTL_dimensions_50_ac_fnnmar.scr_co_m1_meansqres	NL_TSTL_dimensions_50_ac_fnnmar_scr_co_m1_meansqres	nonlinear,tstool,scaling,dimension	5417	932	-0.894137	0.000419841	0.894137
CO_Embed2_Basic_tau.incircle_1	CO_Embed2_Basic_tau_incircle_1	correlation	1579	743	-0.893354	0.000419841	0.893354
SP_Summaries_fft_logdev.mom5	SP_Summaries_fft_logdev_mom5	spectral	4662	911	-0.892875	0.000419841	0.892875
NL_TSTL_GPCorrSum2_n1_05_100_20_ac_fnnmar.robfit_s	NL_TSTL_GPCorrSum2_n1_05_100_20_ac_fnnmar_robfit_s	nonlinear,correlation,tstool,stochastic	5284	928	-0.892658	0.000419841	0.892658
DN_OutlierTest5.std	DN_OutlierTest5_std	spread,distribution,outliers	1044	648	0.891851	0.000419841	0.891851
MF_armax_1_1_05_1.dwts	MF_armax_1_1_05_1_dwts	model	7456	1031	0.891483	0.000419841	0.891483
MF_armax_1_1_05_1.ac1	MF_armax_1_1_05_1_ac1	model	7446	1031	-0.89091	0.000419841	0.89091
DN_OutlierInclude_abs_001.nflr2	DN_OutlierInclude_abs_001_nflr2	distribution,outliers	3230	863	0.890851	0.000419841	0.890851
DN_RemovePoints_min_05.mean	DN_RemovePoints_min_05_mean	correlation,outliers	1747	758	0.890424	0.000419841	0.890424
EN_DistributionEntropy_hist_10_02	EN_DistributionEntropy_hist_10_02	entropy	902	543	-0.890313	0.000419841	0.890313
DN_Withinp_25	DN_Withinp_25	distribution,spread	49	46	0.890242	0.000419841	0.890242
NL_TSTL_dimensions_50_ac_fnnmar.scr_co_m1_meanabsres	NL_TSTL_dimensions_50_ac_fnnmar_scr_co_m1_meanabsres	nonlinear,tstool,scaling,dimension	5416	932	-0.889966	0.000419841	0.889966
NL_BoxCorrDim_50_ac_5.minr6	NL_BoxCorrDim_50_ac_5_minr6	nonlinear,correlation,tstool,dimension	5212	926	-0.889862	0.000419841	0.889862
EN_DistributionEntropy_hist_auto_01	EN_DistributionEntropy_hist_auto_01	entropy	907	548	-0.888329	0.000419841	0.888329
NL_TSTL_GPCorrSum2_n1_05_40_20_ac_fnnmar.robfitresmeanabs	NL_TSTL_GPCorrSum2_n1_05_40_20_ac_fnnmar_robfitresmeanabs	nonlinear,correlation,tstool,stochastic	5273	927	-0.888157	0.000419841	0.888157
DN_OutlierInclude_abs_001.nflrmse	DN_OutlierInclude_abs_001_nflrmse	distribution,outliers	3231	863	-0.887915	0.000419841	0.887915
DN_Moments_4	DN_Moments_4	distribution,moment,shape	24	23	-0.887585	0.000419841	0.887585
SP_Summaries_fft_logdev.stdlog	SP_Summaries_fft_logdev_stdlog	spectral	4656	911	-0.887499	0.000419841	0.887499
DN_Withinp_10	DN_Withinp_10	distribution,spread	46	43	-0.887116	0.000419841	0.887116
CO_Embed2_tau.eucds4	CO_Embed2_tau_eucds4	correlation,embedding	1931	767	-0.886842	0.000419841	0.886842
NL_BoxCorrDim_50_ac_5.minr7	NL_BoxCorrDim_50_ac_5_minr7	nonlinear,correlation,tstool,dimension	5216	926	-0.886747	0.000419841	0.886747
CO_Embed2_Shapes_tau_circle_01.hist_ent	CO_Embed2_Shapes_tau_circle_01_hist_ent	correlation,embedding	1977	770	0.886451	0.000419841	0.886451
DN_pleft_03	DN_pleft03	distribution,spread	60	57	0.886429	0.000419841	0.886429
CO_Embed2_Basic_tau.incircle_02	CO_Embed2_Basic_tau_incircle_02	correlation	1577	743	-0.886371	0.000419841	0.886371
SP_Summaries_fft_logdev.std	SP_Summaries_fft_logdev_std	spectral	4655	911	-0.885658	0.000419841	0.885658
CO_Embed2_Shapes_tau_circle_1.mode	CO_Embed2_Shapes_tau_circle_1_mode	correlation,embedding	1990	771	-0.885051	0.000419841	0.885051
DN_RemovePoints_absfar_01.std	DN_RemovePoints_absfar_01_std	correlation,outliers	1717	755	0.884824	0.000419841	0.884824
CO_Embed2_Shapes_tau_circle_01.mean	CO_Embed2_Shapes_tau_circle_01_mean	correlation,embedding	1972	770	-0.884511	0.000419841	0.884511
CO_Embed2_tau.areas_50	CO_Embed2_tau_areas_50	correlation,embedding	1938	767	0.883996	0.000419841	0.883996
NL_TSTL_GPCorrSum2_n1_05_100_20_ac_fnnmar.robfitresmeanabs	NL_TSTL_GPCorrSum2_n1_05_100_20_ac_fnnmar_robfitresmeanabs	nonlinear,correlation,tstool,stochastic	5287	928	-0.883952	0.000419841	0.883952
DN_Withinp_20	DN_Withinp_20	distribution,spread	48	45	0.882868	0.000419841	0.882868
DN_pleft_005	DN_pleft005	distribution,spread	57	54	-0.881097	0.000419841	0.881097
MF_armax_1_1_05_1.p4_5	MF_armax_1_1_05_1_p4_5	model	7444	1031	0.880334	0.000419841	0.880334
SP_Summaries_fft_logdev.mean	SP_Summaries_fft_logdev_mean	spectral	4658	911	-0.879921	0.000419841	0.879921
DN_RemovePoints_absclose_08.kurtosisrat	DN_RemovePoints_absclose_08_kurtosisrat	correlation,outliers,distribution	1708	754	0.87949	0.000419841	0.87949
DN_RemovePoints_absfar_08.std	DN_RemovePoints_absfar_08_std	correlation,outliers	1728	756	0.879033	0.000419841	0.879033
DN_Moments_6	DN_Moments_6	distribution,moment,shape	26	25	-0.878698	0.000419841	0.878698
CO_Embed2_Basic_tau.incircle_2	CO_Embed2_Basic_tau_incircle_2	correlation	1580	743	-0.878241	0.000419841	0.878241
DN_RemovePoints_absfar_08.kurtosisrat	DN_RemovePoints_absfar_08_kurtosisrat	correlation,outliers,distribution	1730	756	0.877745	0.000419841	0.877745
CO_Embed2_Shapes_tau_circle_01.std	CO_Embed2_Shapes_tau_circle_01_std	correlation,embedding	1970	770	-0.876759	0.000419841	0.876759
SY_SlidingWindow_mom4_sampen10_10	SY_SlidingWindow_mom4_sampen10_10	stationarity	685	412	0.875546	0.000419841	0.875546
MF_armax_3_1_05_1.ac1	MF_armax_3_1_05_1_ac1	model	7413	1030	-0.875156	0.000419841	0.875156
MF_armax_3_1_05_1.dwts	MF_armax_3_1_05_1_dwts	model	7423	1030	0.875098	0.000419841	0.875098
NL_BoxCorrDim_50_ac_5.minr5	NL_BoxCorrDim_50_ac_5_minr5	nonlinear,correlation,tstool,dimension	5208	926	-0.874998	0.000419841	0.874998
CO_Embed2_Basic_tau.incircle_01	CO_Embed2_Basic_tau_incircle_01	correlation	1576	743	-0.874666	0.000419841	0.874666
MF_StateSpace_n4sid_3_05_1.dwts	MF_StateSpace_n4sid_3_05_1_dwts	model	7355	1027	0.873231	0.000419841	0.873231
MF_StateSpace_n4sid_3_05_1.ac1	MF_StateSpace_n4sid_3_05_1_ac1	model	7345	1027	-0.872865	0.000419841	0.872865
SY_SlidingWindow_sampen_s2_2	SY_SlidingWindow_sampen_s2_2	stationarity	627	354	-0.872722	0.000419841	0.872722
EN_DistributionEntropy_hist_auto_005	EN_DistributionEntropy_hist_auto_005	entropy	906	547	-0.871621	0.000419841	0.871621
DN_Withinp_median_15	DN_Withinp_median_15	distribution,spread	53	50	0.870564	0.000419841	0.870564
DN_OutlierTest2.std	DN_OutlierTest2_std	spread,distribution,outliers	1042	647	0.870288	0.000419841	0.870288
NL_TSTL_dimensions_50_ac_fnnmar.scr_co_m1_scaling_exp	NL_TSTL_dimensions_50_ac_fnnmar_scr_co_m1_scaling_exp	nonlinear,tstool,scaling,dimension	5418	932	0.869279	0.000419841	0.869279
DN_Moments_8	DN_Moments_8	distribution,moment,shape	28	27	-0.868784	0.000419841	0.868784
MF_StateSpace_n4sid_3_05_1.p5_5	MF_StateSpace_n4sid_3_05_1_p5_5	model	7344	1027	0.868551	0.000419841	0.868551
DN_Withinp_30	DN_Withinp_30	distribution,spread	50	47	0.86831	0.000419841	0.86831
MF_StateSpace_n4sid_2_05_1.dwts	MF_StateSpace_n4sid_2_05_1_dwts	model	7310	1026	0.868151	0.000419841	0.868151
MF_armax_2_2_05_1.dwts	MF_armax_2_2_05_1_dwts	model	7491	1032	0.868053	0.000419841	0.868053
NL_BoxCorrDim_50_ac_5.meanchr4	NL_BoxCorrDim_50_ac_5_meanchr4	nonlinear,correlation,tstool,dimension	5205	926	-0.868006	0.000419841	0.868006
MF_StateSpace_n4sid_2_05_1.ac1	MF_StateSpace_n4sid_2_05_1_ac1	model	7300	1026	-0.867726	0.000419841	0.867726
HT_DistributionTest_chi2beta100	HT_DistributionTest_chi2beta100	hypothesistest,distribution,raw	982	602	0.867256	0.000419841	0.867256
MF_armax_2_2_05_1.ac1	MF_armax_2_2_05_1_ac1	model	7481	1032	-0.867247	0.000419841	0.867247
DN_CompareKSFit_beta.peaksepy	DN_CompareKSFit_beta_psy	distribution,ksdensity,raw	3189	857	0.866795	0.000419841	0.866795
NL_TSTL_dimensions_50_ac_fnnmar.co_lfitb3	NL_TSTL_dimensions_50_ac_fnnmar_co_lfitb3	nonlinear,tstool,scaling,dimension	5369	932	-0.865585	0.000419841	0.865585
PP_Compare_rav10.kscn_olapint	PP_Compare_rav10_kscn_olapint	preprocessing,raw	6368	976	0.864471	0.000419841	0.864471
PP_Compare_medianf3.kscn_olapint	PP_Compare_medianf3_kscn_olapint	preprocessing,raw	6182	970	-0.864124	0.000419841	0.864124
SB_TransitionMatrix_3ac.T5	SB_TransitionMatrix_3ac_T5	symbolic,transitionmat	1397	736	-0.862831	0.000419841	0.862831
NL_BoxCorrDim_50_ac_5.minr8	NL_BoxCorrDim_50_ac_5_minr8	nonlinear,correlation,tstool,dimension	5220	926	-0.862327	0.000419841	0.862327
MF_StateSpace_n4sid_2_05_1.p4_5	MF_StateSpace_n4sid_2_05_1_p4_5	model	7298	1026	0.861607	0.000419841	0.861607
CO_Embed2_tau.eucdm2	CO_Embed2_tau_eucdm2	correlation,embedding	1922	767	0.861468	0.000419841	0.861468
NL_BoxCorrDim_50_ac_5.mediand4	NL_BoxCorrDim_50_ac_5_mediand4	nonlinear,correlation,tstool,dimension	5190	926	-0.860472	0.000419841	0.860472
DN_Quantile_80	quantile_80	distribution	75	72	0.859938	0.000419841	0.859938
HT_DistributionTest_chi2beta50	HT_DistributionTest_chi2beta50	hypothesistest,distribution,raw	981	601	0.85987	0.000419841	0.85987
NL_BoxCorrDim_50_ac_5.meanr7	NL_BoxCorrDim_50_ac_5_meanr7	nonlinear,correlation,tstool,dimension	5214	926	-0.859278	0.000419841	0.859278
DN_pleft_02	DN_pleft02	distribution,spread	59	56	0.859241	0.000419841	0.859241
SY_SlidingWindow_sampen_s2_1	SY_SlidingWindow_sampen_s2_1	stationarity	626	353	-0.858894	0.000419841	0.858894
NL_BoxCorrDim_50_ac_5.meanr8	NL_BoxCorrDim_50_ac_5_meanr8	nonlinear,correlation,tstool,dimension	5218	926	-0.858786	0.000419841	0.858786
EN_DistributionEntropy_hist_10_01	EN_DistributionEntropy_hist_10_01	entropy	901	542	-0.858666	0.000419841	0.858666
DN_Moments_10	DN_Moments_10	distribution,moment,shape	30	29	-0.858571	0.000419841	0.858571
CO_Embed2_Shapes_tau_circle_01.iqronrange	CO_Embed2_Shapes_tau_circle_01_iqronrange	correlation,embedding	1974	770	-0.858443	0.000419841	0.858443
EN_DistributionEntropy_hist_10_03	EN_DistributionEntropy_hist_10_03	entropy	903	544	-0.858425	0.000419841	0.858425
NL_BoxCorrDim_50_ac_5.minr4	NL_BoxCorrDim_50_ac_5_minr4	nonlinear,correlation,tstool,dimension	5204	926	-0.858307	0.000419841	0.858307
NL_TSTL_dimensions_50_ac_fnnmar.scr_co_m3_pgone	NL_TSTL_dimensions_50_ac_fnnmar_scr_co_m3_pgone	nonlinear,tstool,scaling,dimension	5433	932	0.858295	0.000419841	0.858295
MF_StateSpace_n4sid_3_05_1.p3_5	MF_StateSpace_n4sid_3_05_1_p3_5	model	7342	1027	0.85778	0.000419841	0.85778
EN_DistributionEntropy_ks__01	EN_DistributionEntropy_ks__01	entropy	881	522	-0.857385	0.000419841	0.857385
DN_FitKernelSmoothzscore.max	DN_FitKernelSmoothzscore_max	distribution,ksdensity	933	571	-0.857	0.000419841	0.857
MF_armax_2_2_05_1.sbc1	MF_armax_2_2_05_1_sbc1	model	7494	1032	0.856165	0.000419841	0.856165
CO_Embed2_Shapes_tau_circle_1.iqronrange	CO_Embed2_Shapes_tau_circle_1_iqronrange	correlation,embedding	1988	771	-0.856142	0.000419841	0.856142
DN_RemovePoints_absclose_01.std	DN_RemovePoints_absclose_01_std	correlation,outliers	1684	752	-0.856084	0.000419841	0.856084
NL_TSTL_GPCorrSum2_n1_05_40_20_ac_fnnmar.robfitresmeansq	NL_TSTL_GPCorrSum2_n1_05_40_20_ac_fnnmar_robfitresmeansq	nonlinear,correlation,tstool,stochastic	5274	927	-0.855926	0.000419841	0.855926
NL_BoxCorrDim_50_ac_5.meanchr7	NL_BoxCorrDim_50_ac_5_meanchr7	nonlinear,correlation,tstool,dimension	5217	926	-0.855324	0.000419841	0.855324
NL_BoxCorrDim_50_ac_5.medianr10	NL_BoxCorrDim_50_ac_5_medianr10	nonlinear,correlation,tstool,dimension	5227	926	-0.854732	0.000419841	0.854732
NL_BoxCorrDim_50_ac_5.medianr11	NL_BoxCorrDim_50_ac_5_medianr11	nonlinear,correlation,tstool,dimension	5231	926	-0.854475	0.000419841	0.854475
EN_SampEn_5_03.sampen0	EN_SampEn_5_03_sampen0	entropy,sampen	2726	824	0.854395	0.000419841	0.854395
NL_BoxCorrDim_50_ac_5.mediand3	NL_BoxCorrDim_50_ac_5_mediand3	nonlinear,correlation,tstool,dimension	5187	926	-0.853629	0.000419841	0.853629
NL_BoxCorrDim_50_ac_5.meanr6	NL_BoxCorrDim_50_ac_5_meanr6	nonlinear,correlation,tstool,dimension	5210	926	-0.852888	0.000419841	0.852888
MF_StateSpace_n4sid_3_05_1.p1_5	MF_StateSpace_n4sid_3_05_1_p1_5	model	7340	1027	-0.852844	0.000419841	0.852844
EN_SampEn_5_02.sampen0	EN_SampEn_5_02_sampen0	entropy,sampen	2719	823	0.85281	0.000419841	0.85281
MF_StateSpace_n4sid_3_05_1.ac2	MF_StateSpace_n4sid_3_05_1_ac2	model	7346	1027	-0.852766	0.000419841	0.852766
MF_StateSpace_n4sid_1_05_1.dwts	MF_StateSpace_n4sid_1_05_1_dwts	model	7272	1025	0.85265	0.000419841	0.85265
NL_BoxCorrDim_50_ac_5.medianr9	NL_BoxCorrDim_50_ac_5_medianr9	nonlinear,correlation,tstool,dimension	5223	926	-0.852429	0.000419841	0.852429
EN_SampEn_5_015.sampen0	EN_SampEn_5_015_sampen0	entropy,sampen	2712	822	0.851863	0.000419841	0.851863
MF_StateSpace_n4sid_1_05_1.ac1	MF_StateSpace_n4sid_1_05_1_ac1	model	7262	1025	-0.851643	0.000419841	0.851643
MF_armax_2_2_05_1.p4_5	MF_armax_2_2_05_1_p4_5	model	7479	1032	0.851572	0.000419841	0.851572
EN_SampEn_5_01.sampen0	EN_SampEn_5_01_sampen0	entropy,sampen	2705	821	0.851295	0.000419841	0.851295
NL_BoxCorrDim_50_ac_5.meanr9	NL_BoxCorrDim_50_ac_5_meanr9	nonlinear,correlation,tstool,dimension	5222	926	-0.850922	0.000419841	0.850922
DN_RemovePoints_absfar_01.kurtosisrat	DN_RemovePoints_absfar_01_kurtosisrat	correlation,outliers,distribution	1719	755	0.849185	0.000419841	0.849185
SY_RangeEvolve.nuqp50	SY_RangeEvolve_nuqp50	stationarity	2219	494	0.849087	0.000419841	0.849087
MF_FitSubsegments_ar_2_uniform_25_01.a_1_std	MF_FitSubsegments_ar_2_uniform_25_01_a_1_std	model,prediction	7124	1017	-0.848968	0.000419841	0.848968
SB_BinaryStats_iqr.pupstat2	SB_BinaryStats_iqr_pupstat2	distribution,stationarity	3487	877	0.848527	0.000419841	0.848527
NL_BoxCorrDim_50_ac_5.medianr12	NL_BoxCorrDim_50_ac_5_medianr12	nonlinear,correlation,tstool,dimension	5235	926	-0.848278	0.000419841	0.848278
SD_TSTL_surrogates_1_100_3_trev.stdsurr	SD_TSTL_surrogates_1_100_3_trev_stdsurr	nonlinear,tstool,correlation,surrogate	5868	959	-0.848061	0.000419841	0.848061
MF_armax_2_2_05_1.ac2	MF_armax_2_2_05_1_ac2	model	7482	1032	-0.848006	0.000419841	0.848006
NL_TSTL_GPCorrSum2_n1_05_100_20_ac_fnnmar.robfitresmeansq	NL_TSTL_GPCorrSum2_n1_05_100_20_ac_fnnmar_robfitresmeansq	nonlinear,correlation,tstool,stochastic	5288	928	-0.847813	0.000419841	0.847813
HT_DistributionTest_chi2beta25	HT_DistributionTest_chi2beta25	hypothesistest,distribution,raw	980	600	0.847744	0.000419841	0.847744
SB_TransitionpAlphabet_20_ac.meandiagfexp_b	SB_TransitionpAlphabet_20_ac_meandiagfexp_b	symbolic,transitionmat	1481	740	-0.847694	0.000419841	0.847694
NL_BoxCorrDim_50_ac_5.medianstretch	NL_BoxCorrDim_50_ac_5_medianstretch	nonlinear,correlation,tstool,dimension	5264	926	-0.847646	0.000419841	0.847646
SY_SlidingWindow_sampen_s2_10	SY_SlidingWindow_sampen_s2_10	stationarity	628	355	-0.847077	0.000419841	0.847077
EN_SampEn_5_005.sampen0	EN_SampEn_5_005_sampen0	entropy,sampen	2698	820	0.846642	0.000419841	0.846642
MF_StateSpace_n4sid_2_05_1.ac2	MF_StateSpace_n4sid_2_05_1_ac2	model	7301	1026	-0.846095	0.000419841	0.846095
SY_SlidingWindow_sampen_ent2_1	SY_SlidingWindow_sampen_ent2_1	stationarity	640	367	-0.845523	0.000419841	0.845523
NL_BoxCorrDim_50_ac_5.medianr8	NL_BoxCorrDim_50_ac_5_medianr8	nonlinear,correlation,tstool,dimension	5219	926	-0.844851	0.000419841	0.844851
CO_Embed2_Shapes_tau_circle_01.max	CO_Embed2_Shapes_tau_circle_01_max	correlation,embedding	1969	770	-0.84435	0.000419841	0.84435
DN_OutlierInclude_n_001.mdrmd	DN_OutlierInclude_n_001_mdrmd	distribution,outliers	3294	865	-0.844147	0.000419841	0.844147
DN_OutlierInclude_p_001.nfexpb	DN_OutlierInclude_p_001_nfexpb	distribution,outliers	3255	864	0.843895	0.000419841	0.843895
CO_tc3_ac.denom	CO_tc3_ac_denom	correlation,nonlinear	1113	706	-0.843835	0.000419841	0.843835
PP_Compare_medianf3.olbt_s5	PP_Compare_medianf3_olbt_s5	preprocessing,raw	6189	970	0.843732	0.000419841	0.843732
SC_FluctAnal_2_nothing_50_logi.alpha	SC_FluctAnal_2_nothing_50_logi_alpha	scaling	3886	892	0.843078	0.000419841	0.843078
DN_OutlierInclude_n_001.mdrm	DN_OutlierInclude_n_001_mdrm	distribution,outliers	3293	865	-0.842764	0.000419841	0.842764
MF_StateSpace_n4sid_2_05_1.p5_5	MF_StateSpace_n4sid_2_05_1_p5_5	model	7299	1026	0.841867	0.000419841	0.841867
MF_armax_2_2_05_1.p1_5	MF_armax_2_2_05_1_p1_5	model	7476	1032	-0.841237	0.000419841	0.841237
SB_TransitionMatrix_4ac.TD3	SB_TransitionMatrix_4ac_TD3	symbolic,transitionmat	1416	737	-0.840891	0.000419841	0.840891
DN_OutlierInclude_n_001.mrmd	DN_OutlierInclude_n_001_mrmd	distribution,outliers	3297	865	-0.840449	0.000419841	0.840449
CO_Embed2_Shapes_tau_circle_01.mode	CO_Embed2_Shapes_tau_circle_01_mode	correlation,embedding	1976	770	0.839965	0.000419841	0.839965
NL_BoxCorrDim_50_ac_5.medianr7	NL_BoxCorrDim_50_ac_5_medianr7	nonlinear,correlation,tstool,dimension	5215	926	-0.839582	0.000419841	0.839582
DN_OutlierInclude_n_001.mrm	DN_OutlierInclude_n_001_mrm	distribution,outliers	3296	865	-0.839146	0.000419841	0.839146
DN_CompareKSFit_norm.peaksepy	DN_CompareKSFit_norm_psy	distribution,ksdensity,raw	3174	854	0.838678	0.000419841	0.838678
DN_CompareKSFit_beta.relent	DN_CompareKSFit_beta_relent	distribution,ksdensity,raw	3192	857	-0.838227	0.000419841	0.838227
MF_armax_2_2_05_1.ac1n	MF_armax_2_2_05_1_ac1n	model	7484	1032	-0.838144	0.000419841	0.838144
DN_OutlierInclude_abs_001.mdrmd	DN_OutlierInclude_abs_001_mdrmd	distribution,outliers	3233	863	-0.838135	0.000419841	0.838135
MF_StateSpace_n4sid_3_05_1.sbc1	MF_StateSpace_n4sid_3_05_1_sbc1	model	7358	1027	0.838094	0.000419841	0.838094
NL_TSTL_GPCorrSum2_n1_05_40_20_ac_fnnmar.maxlnCr	NL_TSTL_GPCorrSum2_n1_05_40_20_ac_fnnmar_maxlnCr	nonlinear,correlation,tstool,stochastic	5278	927	-0.837558	0.000419841	0.837558
MF_StateSpace_n4sid_2_05_1.sbc1	MF_StateSpace_n4sid_2_05_1_sbc1	model	7313	1026	0.837147	0.000419841	0.837147
NL_BoxCorrDim_50_ac_5.meanr4	NL_BoxCorrDim_50_ac_5_meanr4	nonlinear,correlation,tstool,dimension	5202	926	-0.836918	0.000419841	0.836918
DN_OutlierInclude_abs_001.mrmd	DN_OutlierInclude_abs_001_mrmd	distribution,outliers	3236	863	-0.836902	0.000419841	0.836902
DN_RemovePoints_absclose_08.std	DN_RemovePoints_absclose_08_std	correlation,outliers	1706	754	-0.83595	0.000419841	0.83595
NL_BoxCorrDim_50_ac_5.meanr10	NL_BoxCorrDim_50_ac_5_meanr10	nonlinear,correlation,tstool,dimension	5226	926	-0.834946	0.000419841	0.834946
SY_RangeEvolve.nuqp20	SY_RangeEvolve_nuqp20	stationarity	2218	494	0.834883	0.000419841	0.834883
MF_armax_3_1_05_1.ac2	MF_armax_3_1_05_1_ac2	model	7414	1030	-0.834492	0.000419841	0.834492
CO_Embed2_Basic_tau.incircle_3	CO_Embed2_Basic_tau_incircle_3	correlation	1581	743	-0.834099	0.000419841	0.834099
MF_StateSpace_n4sid_1_05_1.p5_5	MF_StateSpace_n4sid_1_05_1_p5_5	model	7261	1025	0.833076	0.000419841	0.833076
NL_BoxCorrDim_50_ac_5.meanr5	NL_BoxCorrDim_50_ac_5_meanr5	nonlinear,correlation,tstool,dimension	5206	926	-0.832013	0.000419841	0.832013
MF_StateSpace_n4sid_1_05_1.p4_5	MF_StateSpace_n4sid_1_05_1_p4_5	model	7260	1025	0.831631	0.000419841	0.831631
DN_OutlierInclude_abs_001.mdrm	DN_OutlierInclude_abs_001_mdrm	distribution,outliers	3232	863	-0.831198	0.000419841	0.831198
CO_Embed2_tau.eucdm5	CO_Embed2_tau_eucdm5	correlation,embedding	1925	767	-0.831048	0.000419841	0.831048
MF_armax_3_1_05_1.p5_5	MF_armax_3_1_05_1_p5_5	model	7412	1030	0.830951	0.000419841	0.830951
DN_OutlierInclude_abs_001.mrm	DN_OutlierInclude_abs_001_mrm	distribution,outliers	3235	863	-0.830904	0.000419841	0.830904
DN_OutlierInclude_p_001.mrmd	DN_OutlierInclude_p_001_mrmd	distribution,outliers	3267	864	-0.830776	0.000419841	0.830776
NL_BoxCorrDim_50_ac_5.meand3	NL_BoxCorrDim_50_ac_5_meand3	nonlinear,correlation,tstool,dimension	5186	926	-0.830315	0.000419841	0.830315
MF_StateSpace_n4sid_2_05_1.p1_5	MF_StateSpace_n4sid_2_05_1_p1_5	model	7295	1026	-0.830146	0.000419841	0.830146
NL_BoxCorrDim_50_ac_5.medianr6	NL_BoxCorrDim_50_ac_5_medianr6	nonlinear,correlation,tstool,dimension	5211	926	-0.830047	0.000419841	0.830047
DN_CompareKSFit_logn.peaksepy	DN_CompareKSFit_logn_psy	distribution,ksdensity,raw,posOnly	3209	861	0.82983	0.000419841	0.82983
DN_RemovePoints_absclose_05.kurtosisrat	DN_RemovePoints_absclose_05_kurtosisrat	correlation,outliers,distribution	1697	753	0.829813	0.000419841	0.829813
TSTL_localdensity_5_40_ac_fnnmar.rangeden	TSTL_localdensity_5_40_ac_fnnmar_rangeden	nonlinear,tstool	5503	938	-0.829634	0.000419841	0.829634
TSTL_localdensity_5_40_ac_2.minden	TSTL_localdensity_5_40_ac_2_minden	nonlinear,tstool	5514	939	0.829369	0.000419841	0.829369
SY_LocalGlobal_p5.std	SY_LocalGlobal_std_p5	stationarity	780	503	0.829172	0.000419841	0.829172
MF_armax_2_2_05_1.p5_5	MF_armax_2_2_05_1_p5_5	model	7480	1032	0.829089	0.000419841	0.829089
NL_TSTL_GPCorrSum2_n1_05_100_20_ac_fnnmar.maxlnCr	NL_TSTL_GPCorrSum2_n1_05_100_20_ac_fnnmar_maxlnCr	nonlinear,correlation,tstool,stochastic	5292	928	-0.828533	0.000419841	0.828533
HT_DistributionTest_chi2beta10	HT_DistributionTest_chi2beta10	hypothesistest,distribution,raw	979	599	0.828271	0.000419841	0.828271
MF_armax_3_1_05_1.sbc1	MF_armax_3_1_05_1_sbc1	model	7426	1030	0.828185	0.000419841	0.828185
DN_CompareKSFit_gamma.peaksepy	DN_CompareKSFit_gamma_psy	distribution,ksdensity,raw,posOnly	3204	860	0.827859	0.000419841	0.827859
DN_OutlierInclude_p_001.mdrmd	DN_OutlierInclude_p_001_mdrmd	distribution,outliers	3264	864	-0.82754	0.000419841	0.82754
NL_BoxCorrDim_50_ac_5.meand4	NL_BoxCorrDim_50_ac_5_meand4	nonlinear,correlation,tstool,dimension	5189	926	-0.827261	0.000419841	0.827261
MD_rawHRVmeas.tri20	MD_rawHRVmeas_tri20	medical,raw	7870	1064	0.826214	0.000419841	0.826214
MF_StateSpace_n4sid_2_05_1.ac1n	MF_StateSpace_n4sid_2_05_1_ac1n	model	7303	1026	-0.825523	0.000419841	0.825523
NL_TSTL_dimensions_50_ac_fnnmar.co_lfitb2	NL_TSTL_dimensions_50_ac_fnnmar_co_lfitb2	nonlinear,tstool,scaling,dimension	5368	932	-0.824266	0.000419841	0.824266
NL_BoxCorrDim_50_ac_5.medianr4	NL_BoxCorrDim_50_ac_5_medianr4	nonlinear,correlation,tstool,dimension	5203	926	-0.823692	0.000419841	0.823692
MF_armax_3_1_05_1.ac1n	MF_armax_3_1_05_1_ac1n	model	7416	1030	-0.82357	0.000419841	0.82357
SY_SlidingWindow_sampen_ent2_2	SY_SlidingWindow_sampen_ent2_2	stationarity	641	368	-0.823242	0.000419841	0.823242
NL_BoxCorrDim_50_ac_5.medianr13	NL_BoxCorrDim_50_ac_5_medianr13	nonlinear,correlation,tstool,dimension	5239	926	-0.823193	0.000419841	0.823193
MF_StateSpace_n4sid_3_05_1.ac1n	MF_StateSpace_n4sid_3_05_1_ac1n	model	7348	1027	-0.822661	0.000419841	0.822661
NL_TSTL_dimensions_50_ac_fnnmar.co_lfitm3	NL_TSTL_dimensions_50_ac_fnnmar_co_lfitm3	nonlinear,tstool,scaling,dimension	5365	932	-0.822159	0.000419841	0.822159
DN_OutlierInclude_p_001.mrm	DN_OutlierInclude_p_001_mrm	distribution,outliers	3266	864	-0.821751	0.000419841	0.821751
ST_LocalExtrema_l100.zcext	ST_LocalExtrema_l100_zcext	distribution,stationarity	3346	867	0.821387	0.000419841	0.821387
SY_LocalGlobal_l500.std	SY_LocalGlobal_std_l500	stationarity	776	499	0.821365	0.000419841	0.821365
CO_Embed2_tau.eucdm1	CO_Embed2_tau_eucdm1	correlation,embedding	1921	767	0.820174	0.000419841	0.820174
DN_RemovePoints_absclose_01.kurtosisrat	DN_RemovePoints_absclose_01_kurtosisrat	correlation,outliers,distribution	1686	752	0.819979	0.000419841	0.819979
SY_SlidingWindow_sampen_ent2_10	SY_SlidingWindow_sampen_ent2_10	stationarity	642	369	-0.819928	0.000419841	0.819928
NL_BoxCorrDim_50_ac_5.meanr11	NL_BoxCorrDim_50_ac_5_meanr11	nonlinear,correlation,tstool,dimension	5230	926	-0.818496	0.000419841	0.818496
DN_OutlierInclude_p_001.mdrm	DN_OutlierInclude_p_001_mdrm	distribution,outliers	3263	864	-0.818241	0.000419841	0.818241
NL_TSTL_dimensions_50_ac_fnnmar.co_meanm3	NL_TSTL_dimensions_50_ac_fnnmar_co_meanm3	nonlinear,tstool,scaling,dimension	5355	932	-0.817585	0.000419841	0.817585
MF_armax_3_1_05_1.p3_5	MF_armax_3_1_05_1_p3_5	model	7410	1030	0.817462	0.000419841	0.817462
DN_SimpleFit_exp1_ks.rmse	DN_SimpleFit_exp1_rmse_ks	distribution,gof,exp1	3159	851	-0.817283	0.000419841	0.817283
DN_CompareKSFit_beta.olapint	DN_CompareKSFit_beta_olapint	distribution,ksdensity,raw	3191	857	-0.816954	0.000419841	0.816954
NL_TSTL_dimensions_50_ac_fnnmar.bc_lfitb3	NL_TSTL_dimensions_50_ac_fnnmar_bc_lfitb3	nonlinear,tstool,scaling,dimension	5347	932	-0.815955	0.000419841	0.815955
NL_TSTL_dimensions_50_ac_fnnmar.scr_co_m1_minbad	NL_TSTL_dimensions_50_ac_fnnmar_scr_co_m1_minbad	nonlinear,tstool,scaling,dimension	5411	932	-0.812986	0.000419841	0.812986
MF_StateSpace_n4sid_3_05_1.p4_5	MF_StateSpace_n4sid_3_05_1_p4_5	model	7343	1027	0.812752	0.000419841	0.812752
NL_TISEAN_c1_1_1_7_002_05.bestestd	NL_TISEAN_c1_1_1_7_002_05_bestestd	nonlinear,tisean,dimension,entropy	5057	922	-0.812466	0.000419841	0.812466
HT_DistributionTest_ks_beta	HT_DistributionTest_ks_beta	hypothesistest,distribution,ks,raw	1011	631	0.812455	0.000419841	0.812455
MF_StateSpace_n4sid_1_05_1.sbc1	MF_StateSpace_n4sid_1_05_1_sbc1	model	7275	1025	0.812417	0.000419841	0.812417
MD_rawHRVmeas.tri10	MD_rawHRVmeas_tri10	medical,raw	7869	1064	0.812091	0.000419841	0.812091
SB_TransitionpAlphabet_20_ac.meandiagfexp_a	SB_TransitionpAlphabet_20_ac_meandiagfexp_a	symbolic,transitionmat	1480	740	0.811723	0.000419841	0.811723
NL_BoxCorrDim_50_ac_5.mediand2	NL_BoxCorrDim_50_ac_5_mediand2	nonlinear,correlation,tstool,dimension	5184	926	-0.811157	0.000419841	0.811157
NL_TSTL_dimensions_50_ac_fnnmar.co_meanm2	NL_TSTL_dimensions_50_ac_fnnmar_co_meanm2	nonlinear,tstool,scaling,dimension	5354	932	-0.810373	0.000419841	0.810373
AC_15	AC_15	correlation	107	106	0.808767	0.000419841	0.808767
NL_BoxCorrDim_50_ac_5.meand2	NL_BoxCorrDim_50_ac_5_meand2	nonlinear,correlation,tstool,dimension	5183	926	-0.80813	0.000419841	0.80813
CO_Embed2_Basic_tau.downdiag01	CO_Embed2_Basic_tau_downdiag01	correlation	1557	743	-0.807932	0.000419841	0.807932
NL_BoxCorrDim_50_ac_5.medianr5	NL_BoxCorrDim_50_ac_5_medianr5	nonlinear,correlation,tstool,dimension	5207	926	-0.807672	0.000419841	0.807672
EN_DistributionEntropy_hist_10_005	EN_DistributionEntropy_hist_10_005	entropy	900	541	-0.806891	0.000419841	0.806891
CO_StickAngles_y.kurtosis_p	CO_StickAngles_y_kurtosis_p	correlation	1907	766	-0.806725	0.000419841	0.806725
PP_Compare_medianf3.olbt_s2	PP_Compare_medianf3_olbt_s2	preprocessing,raw	6188	970	0.805809	0.000419841	0.805809
NL_BoxCorrDim_50_ac_5.meand5	NL_BoxCorrDim_50_ac_5_meand5	nonlinear,correlation,tstool,dimension	5192	926	-0.80441	0.000419841	0.80441
SP_Summaries_fft_logdev.fpolysat_a	SP_Summaries_fft_logdev_fpolysat_a	spectral	4682	911	-0.804231	0.000419841	0.804231
SC_FluctAnal_2_dfa_50_1_3_logi.alpha	SC_FluctAnal_2_dfa_50_1_3_logi_alpha	scaling	4174	904	0.803718	0.000419841	0.803718
NL_TSTL_dimensions_50_ac_fnnmar.co_meandiff	NL_TSTL_dimensions_50_ac_fnnmar_co_meandiff	nonlinear,tstool,scaling,dimension	5362	932	-0.802675	0.000419841	0.802675
WL_cwt_db3_32.stat_2_s_m	WL_cwt_db3_32_stat_2_s_m	wavelet,cwt	6606	989	-0.802193	0.000419841	0.802193
WL_coeffs_db3_5.wb1m	WL_coeffs_db3_5_wb1m	wavelet	6705	997	0.801806	0.000419841	0.801806
MF_StateSpace_n4sid_2_05_1.p3_5	MF_StateSpace_n4sid_2_05_1_p3_5	model	7297	1026	0.80123	0.000419841	0.80123
SC_FluctAnal_2_endptdiff_50_logi.ratsplitminerr	SC_FluctAnal_2_endptdiff_50_logi_ratsplitminerr	scaling	3917	893	-0.801181	0.000419841	0.801181
MF_armax_2_2_05_1.p3_5	MF_armax_2_2_05_1_p3_5	model	7478	1032	0.800102	0.000419841	0.800102
SB_TransitionMatrix_3ac.mineig	SB_TransitionMatrix_3ac_mineig	symbolic,transitionmat	1409	736	-0.799918	0.000419841	0.799918
CO_Embed2_Basic_tau.parabdown05	CO_Embed2_Basic_tau_parabdown05	correlation	1564	743	-0.79963	0.000419841	0.79963
MD_hrv_classic.tri	MD_hrv_classic_tri	medical	7763	1051	0.799517	0.000419841	0.799517
MF_StateSpace_n4sid_2_05_1.ac2n	MF_StateSpace_n4sid_2_05_1_ac2n	model	7304	1026	-0.798766	0.000419841	0.798766
NL_BoxCorrDim_50_ac_5.meanr12	NL_BoxCorrDim_50_ac_5_meanr12	nonlinear,correlation,tstool,dimension	5234	926	-0.798536	0.000419841	0.798536
MF_StateSpace_n4sid_1_05_1.ac1n	MF_StateSpace_n4sid_1_05_1_ac1n	model	7265	1025	-0.798003	0.000419841	0.798003
NL_BoxCorrDim_50_ac_5.mind2	NL_BoxCorrDim_50_ac_5_mind2	nonlinear,correlation,tstool,dimension	5185	926	-0.79792	0.000419841	0.79792
SY_RangeEvolve.nuqp10	SY_RangeEvolve_nuqp10	stationarity	2217	494	0.797379	0.000419841	0.797379
SY_RangeEvolve.p50	SY_RangeEvolve_p50	stationarity	2227	494	0.797311	0.000419841	0.797311
WL_coeffs_db3_5.wb10m	WL_coeffs_db3_5_wb10m	wavelet	6704	997	0.797131	0.000419841	0.797131
NL_TSTL_acp_mi_1__10.iqracpf_1	NL_TSTL_acp_mi_1__10_iqracpf_1	nonlinear,correlation	5093	924	-0.796348	0.000419841	0.796348
DN_Quantile_20	quantile_20	distribution	69	66	-0.796256	0.000419841	0.796256
WL_cwt_sym2_32.stat_2_s_m	WL_cwt_sym2_32_stat_2_s_m	wavelet,cwt	6632	990	-0.795674	0.000419841	0.795674
NL_TISEAN_c1_1_1_7_002_05.mind	NL_TISEAN_c1_1_1_7_002_05_mind	nonlinear,tisean,dimension,entropy	5061	922	-0.793062	0.000419841	0.793062
NL_TSTL_dimensions_50_ac_fnnmar.co_lfitb1	NL_TSTL_dimensions_50_ac_fnnmar_co_lfitb1	nonlinear,tstool,scaling,dimension	5367	932	-0.791681	0.000419841	0.791681
SC_FluctAnal_2_dfa_50_1_2_logi.linfitint	SC_FluctAnal_2_dfa_50_1_2_logi_linfitint	scaling	4149	903	-0.790792	0.000419841	0.790792
MF_armax_3_1_05_1.p1_5	MF_armax_3_1_05_1_p1_5	model	7408	1030	-0.790096	0.000419841	0.790096
MF_armax_1_1_05_1.sbc1	MF_armax_1_1_05_1_sbc1	model	7459	1031	0.789762	0.000419841	0.789762
NL_BoxCorrDim_50_ac_5.meanchr18	NL_BoxCorrDim_50_ac_5_meanchr18	nonlinear,correlation,tstool,dimension	5261	926	0.787577	0.000419841	0.787577
NL_TSTL_dimensions_50_ac_fnnmar.bc_lfitmeansqdev3	NL_TSTL_dimensions_50_ac_fnnmar_bc_lfitmeansqdev3	nonlinear,tstool,scaling,dimension	5351	932	0.787488	0.000419841	0.787488
NL_TSTL_GPCorrSum2_n1_05_40_20_ac_fnnmar.robfitresac1	NL_TSTL_GPCorrSum2_n1_05_40_20_ac_fnnmar_robfitresac1	nonlinear,correlation,tstool,stochastic	5275	927	-0.787384	0.000419841	0.787384
NL_BoxCorrDim_50_ac_5.meanchr17	NL_BoxCorrDim_50_ac_5_meanchr17	nonlinear,correlation,tstool,dimension	5257	926	0.787188	0.000419841	0.787188
PH_Walker_prop_01.w_tau	PH_Walker_prop_01_w_tau	trend	2523	811	0.786875	0.000419841	0.786875
SB_TransitionpAlphabet_20_ac.trfexp_b	SB_TransitionpAlphabet_20_ac_trfexp_b	symbolic,transitionmat	1489	740	-0.786647	0.000419841	0.786647
CO_Embed2_Basic_tau.parabdown01	CO_Embed2_Basic_tau_parabdown01	correlation	1563	743	-0.786487	0.000419841	0.786487
NL_BoxCorrDim_50_ac_5.medianr14	NL_BoxCorrDim_50_ac_5_medianr14	nonlinear,correlation,tstool,dimension	5243	926	-0.7862	0.000419841	0.7862
NL_BoxCorrDim_50_ac_5.meanchr16	NL_BoxCorrDim_50_ac_5_meanchr16	nonlinear,correlation,tstool,dimension	5253	926	0.785826	0.000419841	0.785826
MF_armax_2_2_05_1.minfpe	MF_armax_2_2_05_1_minfpe	model	7493	1032	0.785684	0.000419841	0.785684
NL_TSTL_dimensions_50_ac_fnnmar.co_mindiff	NL_TSTL_dimensions_50_ac_fnnmar_co_mindiff	nonlinear,tstool,scaling,dimension	5361	932	0.784477	0.000419841	0.784477
MF_StateSpace_n4sid_3_05_1.ac3	MF_StateSpace_n4sid_3_05_1_ac3	model	7347	1027	-0.783599	0.000419841	0.783599
NL_BoxCorrDim_50_ac_5.meanchr15	NL_BoxCorrDim_50_ac_5_meanchr15	nonlinear,correlation,tstool,dimension	5249	926	0.783276	0.000419841	0.783276
NL_TSTL_acp_mi_1__10.sacpf_10	NL_TSTL_acp_mi_1__10_sacpf_10	nonlinear,correlation	5128	924	-0.78212	0.000419841	0.78212
SY_RangeEvolve.nuql100	SY_RangeEvolve_nuql100	stationarity	2222	494	0.781985	0.000419841	0.781985
CO_Embed2_tau.eucdm4	CO_Embed2_tau_eucdm4	correlation,embedding	1924	767	-0.781958	0.000419841	0.781958
AC_14	AC_14	correlation	106	105	0.781949	0.000419841	0.781949
MF_armax_2_2_05_1.ac3n	MF_armax_2_2_05_1_ac3n	model	7486	1032	-0.781721	0.000419841	0.781721
PH_ForcePotential_sine_10_004_10.tau	PH_ForcePotential_sine_10_004_10_tau	dynamicalSystem	1673	751	-0.780332	0.000419841	0.780332
MF_armax_3_1_05_1.p4_5	MF_armax_3_1_05_1_p4_5	model	7411	1030	0.779047	0.000419841	0.779047
PH_ForcePotential_sine_1_1_1.ac50	PH_ForcePotential_sine_1_1_1_ac50	dynamicalSystem	1661	750	-0.778832	0.000419841	0.778832
NL_BoxCorrDim_50_ac_5.meanchr14	NL_BoxCorrDim_50_ac_5_meanchr14	nonlinear,correlation,tstool,dimension	5245	926	0.778259	0.000419841	0.778259
MF_CompareTestSets_y_ar_best_uniform_25_01_1.ac1s_std	MF_CompareTestSets_y_ar_best_uniform_25_01_1_ac1s_std	model,prediction,arfit,stationarity	7188	1021	-0.77821	0.000419841	0.77821
AC_16	AC_16	correlation	108	107	0.777621	0.000419841	0.777621
NL_TSTL_dimensions_50_ac_fnnmar.co_minm2	NL_TSTL_dimensions_50_ac_fnnmar_co_minm2	nonlinear,tstool,scaling,dimension	5358	932	-0.776552	0.000419841	0.776552
SB_TransitionpAlphabet_20_ac.trflin10adjr2	SB_TransitionpAlphabet_20_ac_trflin10adjr2	symbolic,transitionmat	1493	740	-0.77626	0.000419841	0.77626
MF_armax_2_2_05_1.ac2n	MF_armax_2_2_05_1_ac2n	model	7485	1032	-0.775413	0.000419841	0.775413
MF_CompareTestSets_y_ar_best_uniform_25_01_1.ac1s_iqr	MF_CompareTestSets_y_ar_best_uniform_25_01_1_ac1s_iqr	model,prediction,arfit,stationarity	7189	1021	-0.775404	0.000419841	0.775404
SD_TSTL_surrogates_mi_100_3_trev.stdsurr	SD_TSTL_surrogates_mi_100_3_trev_stdsurr	nonlinear,tstool,correlation,surrogate	5875	960	-0.774924	0.000419841	0.774924
SC_FluctAnal_2_endptdiff_50_logi.ssr	SC_FluctAnal_2_endptdiff_50_logi_ssr	scaling	3913	893	0.774066	0.000419841	0.774066
WL_coeffs_db3_4.wb10m	WL_coeffs_db3_4_wb10m	wavelet	6694	996	0.77255	0.000419841	0.77255
WL_coeffs_db3_4.wb1m	WL_coeffs_db3_4_wb1m	wavelet	6695	996	0.772141	0.000419841	0.772141
NL_TSTL_dimensions_50_ac_fnnmar.co_minm1	NL_TSTL_dimensions_50_ac_fnnmar_co_minm1	nonlinear,tstool,scaling,dimension	5357	932	-0.771999	0.000419841	0.771999
DN_OutlierInclude_abs_001.mfexpb	DN_OutlierInclude_abs_001_mfexpb	distribution,outliers	3219	863	0.771798	0.000419841	0.771798
MF_armax_2_2_05_1.ac3	MF_armax_2_2_05_1_ac3	model	7483	1032	-0.770971	0.000419841	0.770971
SB_TransitionMatrix_5ac.TD3	SB_TransitionMatrix_5ac_TD3	symbolic,transitionmat	1432	738	-0.770365	0.000419841	0.770365
NL_TSTL_dimensions_50_ac_fnnmar.co_meanm1	NL_TSTL_dimensions_50_ac_fnnmar_co_meanm1	nonlinear,tstool,scaling,dimension	5353	932	-0.769802	0.000419841	0.769802
MF_armax_1_1_05_1.ac1n	MF_armax_1_1_05_1_ac1n	model	7449	1031	-0.769357	0.000419841	0.769357
TSTL_delaytime_01_1.meantau	TSTL_delaytime_01_1_meantau	nonlinear,correlation,tstool,tau	5327	931	0.769217	0.000419841	0.769217
NL_TSTL_ReturnTime_5_1_40_n1_1_8.std	NL_TSTL_ReturnTime_5_1_40_n1_1_8_std	nonlinear,tstool	5761	947	0.769168	0.000419841	0.769168
NL_TSTL_acp_mi_1__10.sacpf_9	NL_TSTL_acp_mi_1__10_sacpf_9	nonlinear,correlation	5124	924	-0.769105	0.000419841	0.769105
MF_StateSpace_n4sid_3_05_1.ac2n	MF_StateSpace_n4sid_3_05_1_ac2n	model	7349	1027	-0.769103	0.000419841	0.769103
NL_BoxCorrDim_50_ac_5.meanchr13	NL_BoxCorrDim_50_ac_5_meanchr13	nonlinear,correlation,tstool,dimension	5241	926	0.768925	0.000419841	0.768925
NL_TSTL_dimensions_50_ac_fnnmar.co_maxscalingexp	NL_TSTL_dimensions_50_ac_fnnmar_co_maxscalingexp	nonlinear,tstool,scaling,dimension	5452	932	-0.767003	0.000419841	0.767003
DN_OutlierInclude_p_001.nflrmse	DN_OutlierInclude_p_001_nflrmse	distribution,outliers	3262	864	-0.766579	0.000419841	0.766579
PH_Walker_biasprop_05_01.w_tau	PH_Walker_biasprop_05_01_w_tau	trend	2603	815	0.765898	0.000419841	0.765898
MF_armax_3_1_05_1.ac2n	MF_armax_3_1_05_1_ac2n	model	7417	1030	-0.765211	0.000419841	0.765211
MF_StateSpace_n4sid_2_05_1.ac3n	MF_StateSpace_n4sid_2_05_1_ac3n	model	7305	1026	-0.765073	0.000419841	0.765073
NL_TSTL_dimensions_50_ac_fnnmar.co_lfitm2	NL_TSTL_dimensions_50_ac_fnnmar_co_lfitm2	nonlinear,tstool,scaling,dimension	5364	932	0.764411	0.000419841	0.764411
SB_TransitionMatrix_3ac.T2	SB_TransitionMatrix_3ac_T2	symbolic,transitionmat	1394	736	0.763475	0.000419841	0.763475
DN_OutlierInclude_p_001.nflr2	DN_OutlierInclude_p_001_nflr2	distribution,outliers	3261	864	0.763191	0.000419841	0.763191
MF_armax_2_2_05_1.propbth	MF_armax_2_2_05_1_propbth	model	7489	1032	0.76258	0.000419841	0.76258
DN_CompareKSFit_beta.adiff	DN_CompareKSFit_beta_adiff	distribution,ksdensity,raw	3188	857	-0.762285	0.000419841	0.762285
NL_TSTL_acp_mi_1__10.sacpf_1	NL_TSTL_acp_mi_1__10_sacpf_1	nonlinear,correlation	5092	924	-0.76116	0.000419841	0.76116
SY_RangeEvolve.p20	SY_RangeEvolve_p20	stationarity	2226	494	0.761043	0.000419841	0.761043
TSTL_localdensity_5_40_ac_fnnmar.iqrden	TSTL_localdensity_5_40_ac_fnnmar_iqrden	nonlinear,tstool	5502	938	-0.759303	0.000419841	0.759303
CP_ML_StepDetect_l1pwc_10.diffn12	CP_ML_StepDetect_l1pwc_10_diffn12	stepdetection	7772	1052	-0.75909	0.000419841	0.75909
NL_BoxCorrDim_50_ac_5.meanr13	NL_BoxCorrDim_50_ac_5_meanr13	nonlinear,correlation,tstool,dimension	5238	926	-0.758554	0.000419841	0.758554
WL_cwt_db3_32.stat_5_s_m	WL_cwt_db3_32_stat_5_s_m	wavelet,cwt	6609	989	-0.758217	0.000419841	0.758217
CO_Embed2_tau.arearat	CO_Embed2_tau_arearat	correlation,embedding	1939	767	0.75818	0.000419841	0.75818
MF_CompareTestSets_y_ar_4_rand_25_01_1.ac1s_iqr	MF_CompareTestSets_y_ar_4_rand_25_01_1_ac1s_iqr	model,prediction,stationarity	7169	1020	-0.758156	0.000419841	0.758156
NL_TSTL_ReturnTime_5_1_40_n1_1_8.iqr	NL_TSTL_ReturnTime_5_1_40_n1_1_8_iqr	nonlinear,tstool	5764	947	0.756707	0.000419841	0.756707
TSTL_localdensity_5_40_ac_fnnmar.stdden	TSTL_localdensity_5_40_ac_fnnmar_stdden	nonlinear,tstool	5504	938	-0.756266	0.000419841	0.756266
MF_StateSpace_n4sid_2_05_1.ac3	MF_StateSpace_n4sid_2_05_1_ac3	model	7302	1026	-0.755815	0.000419841	0.755815
SB_TransitionMatrix_5ac.ondiag	SB_TransitionMatrix_5ac_ondiag	symbolic,transitionmat	1435	738	-0.755356	0.000419841	0.755356
MF_armax_3_1_05_1.ac3n	MF_armax_3_1_05_1_ac3n	model	7418	1030	-0.755043	0.000419841	0.755043
MF_GP_hyperparameters_covSEiso_covPeriodic_covNoise_1_200_first.std_mu_data	MF_GP_hyperparameters_covSEiso_covPeriodic_covNoise_1_200_first_std_mu_data	model,GaussianProcess	6502	983	0.754021	0.000419841	0.754021
SC_FluctAnal_2_endptdiff_50_logi.resac1	SC_FluctAnal_2_endptdiff_50_logi_resac1	scaling	3914	893	0.753453	0.000419841	0.753453
MF_armax_2_2_05_1.acsnd0	MF_armax_2_2_05_1_acsnd0	model	7488	1032	-0.753442	0.000419841	0.753442
MF_GP_hyperparameters_covSEiso_covNoise_1_200_first.std_mu_data	MF_GP_hyperparameters_covSEiso_covNoise_1_200_first_std_mu_data	model,GaussianProcess	6489	982	0.752664	0.000419841	0.752664
MF_StateSpace_n4sid_3_05_1.ac3n	MF_StateSpace_n4sid_3_05_1_ac3n	model	7350	1027	-0.752557	0.000419841	0.752557
DN_OutlierInclude_abs_001.mfexpa	DN_OutlierInclude_abs_001_mfexpa	distribution,outliers	3218	863	-0.752351	0.000419841	0.752351
CO_AddNoise_ac_gaussian.fitexpa	CO_AddNoise_ac_gaussian_fitexpa	correlation,AMI,entropy	1287	728	-0.752284	0.000419841	0.752284
MF_CompareTestSets_y_ar_4_rand_25_01_1.ac1s_std	MF_CompareTestSets_y_ar_4_rand_25_01_1_ac1s_std	model,prediction,stationarity	7168	1020	-0.752246	0.000419841	0.752246
PP_Compare_sin2.kscn_olapint	PP_Compare_sin2_kscn_olapint	preprocessing,raw	5996	964	0.752224	0.000419841	0.752224
CO_Embed2_tau.stdspana	CO_Embed2_tau_stdspana	correlation,embedding,stationarity	1935	767	-0.751262	0.000419841	0.751262
FC_LocalSimple_median7.tauresrat	FC_LocalSimple_median7_tauresrat	forecasting	3088	841	-0.750402	0.000419841	0.750402
PH_ForcePotential_sine_1_1_1.tau	PH_ForcePotential_sine_1_1_1_tau	dynamicalSystem	1662	750	-0.749196	0.000419841	0.749196
DN_Withinp_15	DN_Withinp_15	distribution,spread	47	44	-0.749089	0.000419841	0.749089
DN_OutlierInclude_abs_001.stdrfexpb	DN_OutlierInclude_abs_001_stdrfexpb	distribution,outliers	3241	863	0.748847	0.000419841	0.748847
FC_LocalSimple_median5.tauresrat	FC_LocalSimple_median5_tauresrat	forecasting	3078	840	-0.746525	0.000419841	0.746525
DN_Withinp_median_05	DN_Withinp_median_05	distribution,spread	51	48	0.746498	0.000419841	0.746498
MF_armax_1_1_05_1.p5_5	MF_armax_1_1_05_1_p5_5	model	7445	1031	0.745559	0.000419841	0.745559
MF_StateSpace_n4sid_3_05_1.minfpe	MF_StateSpace_n4sid_3_05_1_minfpe	model	7357	1027	0.745527	0.000419841	0.745527
EX_MovingThreshold_01_01.maxq	EX_MovingThreshold_01_01_maxq	outliers	3423	871	-0.745089	0.000419841	0.745089
PH_Walker_biasprop_01_05.w_tau	PH_Walker_biasprop_01_05_w_tau	trend	2623	816	0.744825	0.000419841	0.744825
NL_TSTL_acp_mi_1__10.macpf_2	NL_TSTL_acp_mi_1__10_macpf_2	nonlinear,correlation	5095	924	-0.74298	0.000419841	0.74298
MF_armax_2_2_05_1.acmnd0	MF_armax_2_2_05_1_acmnd0	model	7487	1032	-0.742541	0.000419841	0.742541
CO_Embed2_Basic_tau.updiag05	CO_Embed2_Basic_tau_updiag05	correlation	1556	743	-0.742355	0.000419841	0.742355
CO_AddNoise_ac_gaussian.fitexpr2	CO_AddNoise_ac_gaussian_fitexpr2	correlation,AMI,entropy	1289	728	-0.742285	0.000419841	0.742285
SB_TransitionMatrix_5ac.TD4	SB_TransitionMatrix_5ac_TD4	symbolic,transitionmat	1433	738	-0.741482	0.000419841	0.741482
NL_TSTL_dimensions_50_ac_fnnmar.co_lfitm1	NL_TSTL_dimensions_50_ac_fnnmar_co_lfitm1	nonlinear,tstool,scaling,dimension	5363	932	0.741144	0.000419841	0.741144
MF_StateSpace_n4sid_2_05_1.minfpe	MF_StateSpace_n4sid_2_05_1_minfpe	model	7312	1026	0.740956	0.000419841	0.740956
WL_cwt_sym2_32.stat_5_s_m	WL_cwt_sym2_32_stat_5_s_m	wavelet,cwt	6635	990	-0.740753	0.000419841	0.740753
PP_Compare_sin2.olbt_s2	PP_Compare_sin2_olbt_s2	preprocessing,raw	6002	964	-0.740271	0.000419841	0.740271
CO_Embed2_Basic_tau.parabup05	CO_Embed2_Basic_tau_parabup05	correlation	1562	743	-0.740138	0.000419841	0.740138
SB_TransitionMatrix_4ac.stdeig	SB_TransitionMatrix_4ac_stdeig	symbolic,transitionmat	1423	737	0.73974	0.000419841	0.73974
NL_TSTL_dimensions_50_ac_fnnmar.scr_co_m2_scaling_int	NL_TSTL_dimensions_50_ac_fnnmar_scr_co_m2_scaling_int	nonlinear,tstool,scaling,dimension	5428	932	-0.739644	0.000419841	0.739644
CO_StickAngles_y.statav2_n_s	CO_StickAngles_y_statav2_n_s	correlation,stationarity	1862	766	-0.739231	0.000419841	0.739231
NL_TSTL_GPCorrSum2_n1_05_40_20_ac_fnnmar.meanlnCr	NL_TSTL_GPCorrSum2_n1_05_40_20_ac_fnnmar_meanlnCr	nonlinear,correlation,tstool,stochastic	5280	927	-0.739182	0.000419841	0.739182
NL_TSTL_GPCorrSum2_n1_05_100_20_ac_fnnmar.robfitresac1	NL_TSTL_GPCorrSum2_n1_05_100_20_ac_fnnmar_robfitresac1	nonlinear,correlation,tstool,stochastic	5289	928	-0.73891	0.000419841	0.73891
EX_MovingThreshold_01_002.maxq	EX_MovingThreshold_01_002_maxq	outliers	3434	872	-0.737975	0.000419841	0.737975
MF_CompareTestSets_y_ss_2_uniform_25_01_1.ac1s_std	MF_CompareTestSets_y_ss_2_uniform_25_01_1_ac1s_std	model,prediction,stationarity	7228	1023	-0.737738	0.000419841	0.737738
MF_CompareTestSets_y_ss_2_uniform_25_01_1.ac1s_iqr	MF_CompareTestSets_y_ss_2_uniform_25_01_1_ac1s_iqr	model,prediction,stationarity	7229	1023	-0.734451	0.000419841	0.734451
SB_TransitionMatrix_4ac.mineig	SB_TransitionMatrix_4ac_mineig	symbolic,transitionmat	1425	737	-0.733661	0.000419841	0.733661
WL_coeffs_db3_5.wb25m	WL_coeffs_db3_5_wb25m	wavelet	6703	997	0.733463	0.000419841	0.733463
DN_OutlierInclude_p_001.nfexpc	DN_OutlierInclude_p_001_nfexpc	distribution,outliers	3256	864	-0.73183	0.000419841	0.73183
MF_ExpSmoothing_05_best.ac2n	MF_ExpSmoothing_05_best_ac2n	model	7522	1034	-0.731004	0.000419841	0.731004
MF_ExpSmoothing_05_best.p1_5	MF_ExpSmoothing_05_best_p1_5	model	7513	1034	-0.730713	0.000419841	0.730713
PP_Compare_sin2.olbt_s5	PP_Compare_sin2_olbt_s5	preprocessing,raw	6003	964	-0.730699	0.000419841	0.730699
DN_OutlierInclude_p_001.nflb	DN_OutlierInclude_p_001_nflb	distribution,outliers	3260	864	0.730472	0.000419841	0.730472
EN_DistributionEntropy_ks__005	EN_DistributionEntropy_ks__005	entropy	880	521	-0.730391	0.000419841	0.730391
FC_Surprise_dist_100_5_q_500.mean	FC_Surprise_dist_100_5_q_500_mean	information,symbolic	2266	779	0.730353	0.000419841	0.730353
CP_ML_StepDetect_l1pwc_10.ratn12	CP_ML_StepDetect_l1pwc_10_ratn12	stepdetection	7771	1052	0.73028	0.000419841	0.73028
NL_BoxCorrDim_50_ac_5.meanchr12	NL_BoxCorrDim_50_ac_5_meanchr12	nonlinear,correlation,tstool,dimension	5237	926	0.729245	0.000419841	0.729245
MF_CompareTestSets_y_ss_best_uniform_25_01_1.ac1s_std	MF_CompareTestSets_y_ss_best_uniform_25_01_1_ac1s_std	model,prediction,stationarity	7208	1022	-0.72807	0.000419841	0.72807
NL_TISEAN_c1_1_1_7_002_05.bestgoodness	NL_TISEAN_c1_1_1_7_002_05_bestgoodness	nonlinear,tisean,dimension,entropy	5059	922	-0.727921	0.000419841	0.727921
NL_BoxCorrDim_50_ac_5.meanr14	NL_BoxCorrDim_50_ac_5_meanr14	nonlinear,correlation,tstool,dimension	5242	926	-0.726963	0.000419841	0.726963
CO_StickAngles_y.statav2_p_s	CO_StickAngles_y_statav2_p_s	correlation,stationarity	1860	766	-0.726841	0.000419841	0.726841
SY_SpreadRandomLocal_ac5_100.stdkurt	SY_SpreadRandomLocal_ac5_100_stdkurt	stationarity	2106	477	-0.725722	0.000419841	0.725722
MF_StateSpace_n4sid_3_05_1.propbth	MF_StateSpace_n4sid_3_05_1_propbth	model	7353	1027	0.72561	0.000419841	0.72561
MF_hmm_08_2.LLdifference	MF_hmm_08_2_LLdifference	hmm,model	7744	1049	0.725508	0.000419841	0.725508
SB_TransitionMatrix_4ac.ondiag	SB_TransitionMatrix_4ac_ondiag	symbolic,transitionmat	1418	737	-0.724006	0.000419841	0.724006
MF_CompareTestSets_y_ss_best_uniform_25_01_1.ac1s_iqr	MF_CompareTestSets_y_ss_best_uniform_25_01_1_ac1s_iqr	model,prediction,stationarity	7209	1022	-0.723864	0.000419841	0.723864
NL_TSTL_GPCorrSum2_n1_05_100_20_ac_fnnmar.meanlnCr	NL_TSTL_GPCorrSum2_n1_05_100_20_ac_fnnmar_meanlnCr	nonlinear,correlation,tstool,stochastic	5294	928	-0.722783	0.000419841	0.722783
DN_OutlierInclude_p_001.mfexpc	DN_OutlierInclude_p_001_mfexpc	distribution,outliers	3251	864	0.722573	0.000419841	0.722573
CO_StickAngles_y.kurtosis_all	CO_StickAngles_y_kurtosis_all	correlation	1909	766	-0.722072	0.000419841	0.722072
DN_OutlierInclude_abs_001.mfexpc	DN_OutlierInclude_abs_001_mfexpc	distribution,outliers	3220	863	0.721687	0.000419841	0.721687
DN_OutlierInclude_abs_001.stdrfexpa	DN_OutlierInclude_abs_001_stdrfexpa	distribution,outliers	3240	863	-0.721631	0.000419841	0.721631
MF_hmm_07_3.LLdifference	MF_hmm_07_3_LLdifference	hmm,model	7731	1048	0.721519	0.000419841	0.721519
CO_StickAngles_y.q99_p	CO_StickAngles_y_q99_p	correlation	1895	766	-0.721105	0.000419841	0.721105
MF_StateSpace_n4sid_1_05_1.ac3n	MF_StateSpace_n4sid_1_05_1_ac3n	model	7267	1025	-0.720686	0.000419841	0.720686
TSTL_delaytime_01_1.stdtau	TSTL_delaytime_01_1_stdtau	nonlinear,correlation,tstool,tau	5328	931	-0.720442	0.000419841	0.720442
MF_StateSpace_n4sid_3_05_1.acsnd0	MF_StateSpace_n4sid_3_05_1_acsnd0	model	7352	1027	-0.720364	0.000419841	0.720364
PH_Walker_prop_05.w_tau	PH_Walker_prop_05_w_tau	trend	2543	812	0.719155	0.000419841	0.719155
WL_coeffs_db3_4.wb25m	WL_coeffs_db3_4_wb25m	wavelet	6693	996	0.719005	0.000419841	0.719005
DN_OutlierInclude_p_001.mfexpa	DN_OutlierInclude_p_001_mfexpa	distribution,outliers	3249	864	-0.718817	0.000419841	0.718817
SB_TransitionMatrix_3ac.stdeig	SB_TransitionMatrix_3ac_stdeig	symbolic,transitionmat	1407	736	0.718671	0.000419841	0.718671
SY_SpreadRandomLocal_ac2_100.stdskew	SY_SpreadRandomLocal_ac2_100_stdskew	stationarity	2089	476	-0.718405	0.000419841	0.718405
AC_13	AC_13	correlation	105	104	0.718032	0.000419841	0.718032
NL_TSTL_GPCorrSum2_n1_05_40_20_ac_fnnmar.robfit_sea2	NL_TSTL_GPCorrSum2_n1_05_40_20_ac_fnnmar_robfit_sea2	nonlinear,correlation,tstool,stochastic	5272	927	-0.717126	0.000419841	0.717126
AC_17	AC_17	correlation	109	108	0.714241	0.000419841	0.714241
DN_OutlierInclude_p_001.nfexpa	DN_OutlierInclude_p_001_nfexpa	distribution,outliers	3254	864	0.714036	0.000419841	0.714036
DN_OutlierInclude_n_001.nfexpb	DN_OutlierInclude_n_001_nfexpb	distribution,outliers	3286	865	0.713628	0.000419841	0.713628
NL_BoxCorrDim_50_ac_5.meanchr8	NL_BoxCorrDim_50_ac_5_meanchr8	nonlinear,correlation,tstool,dimension	5221	926	-0.713441	0.000419841	0.713441
CO_trev_ac.denom	CO_trev_ac_denom	correlation,nonlinear	1138	711	-0.712736	0.000419841	0.712736
NL_TSTL_ReturnTime_005_1_005_n1_1_3.statrtym	NL_TSTL_ReturnTime_005_1_005_n1_1_3_statrtym	nonlinear,tstool	5789	948	-0.71267	0.000419841	0.71267
PP_Compare_diff1.kscn_olapint	PP_Compare_diff1_kscn_olapint	preprocessing,raw	6120	968	0.712492	0.000419841	0.712492
MF_StateSpace_n4sid_2_05_1.propbth	MF_StateSpace_n4sid_2_05_1_propbth	model	7308	1026	0.711798	0.000419841	0.711798
NL_BoxCorrDim_50_ac_5.minr9	NL_BoxCorrDim_50_ac_5_minr9	nonlinear,correlation,tstool,dimension	5224	926	-0.710433	0.000419841	0.710433
MF_armax_1_1_05_1.p1_5	MF_armax_1_1_05_1_p1_5	model	7441	1031	-0.710042	0.000419841	0.710042
CO_Embed2_Basic_tau.updiag01	CO_Embed2_Basic_tau_updiag01	correlation	1555	743	-0.7098	0.000419841	0.7098
NL_TSTL_dimensions_50_ac_fnnmar.scr_co_m1_scaling_int	NL_TSTL_dimensions_50_ac_fnnmar_scr_co_m1_scaling_int	nonlinear,tstool,scaling,dimension	5419	932	-0.709388	0.000419841	0.709388
MF_armax_3_1_05_1.minfpe	MF_armax_3_1_05_1_minfpe	model	7425	1030	0.709246	0.000419841	0.709246
SP_Summaries_welch_rect.width_weighted_prom	SP_Summaries_welch_rect_width_weighted_prom	spectral	4394	909	-0.70867	0.000419841	0.70867
NL_TSTL_acp_1_001_025_10_05.iqracpf_1	NL_TSTL_acp_1_001_025_10_05_iqracpf_1	nonlinear,correlation	5145	925	-0.708494	0.000419841	0.708494
SP_Summaries_fft.width_weighted_prom	SP_Summaries_fft_width_weighted_prom	spectral	4518	910	-0.70843	0.000419841	0.70843
ST_LocalExtrema_n50.zcext	ST_LocalExtrema_n50_zcext	distribution,stationarity	3390	869	-0.708122	0.000419841	0.708122
DN_OutlierInclude_abs_001.stdrflr2	DN_OutlierInclude_abs_001_stdrflr2	distribution,outliers	3247	863	-0.707031	0.000419841	0.707031
MF_StateSpace_n4sid_2_05_1.acsnd0	MF_StateSpace_n4sid_2_05_1_acsnd0	model	7307	1026	-0.70682	0.000419841	0.70682
CO_glscf_2_2_tau	CO_glscf_2_2_tau	correlation,glscf	520	247	-0.706809	0.000419841	0.706809
CO_StickAngles_y.q1_p	CO_StickAngles_y_q1_p	correlation	1892	766	0.70672	0.000419841	0.70672
MF_StateSpace_n4sid_3_05_1.acmnd0	MF_StateSpace_n4sid_3_05_1_acmnd0	model	7351	1027	-0.705848	0.000419841	0.705848
DN_OutlierInclude_abs_001.stdrfexpc	DN_OutlierInclude_abs_001_stdrfexpc	distribution,outliers	3242	863	0.705597	0.000419841	0.705597
SY_RangeEvolve.p10	SY_RangeEvolve_p10	stationarity	2225	494	0.704973	0.000419841	0.704973
PP_Compare_diff2.kscn_olapint	PP_Compare_diff2_kscn_olapint	preprocessing,raw	6151	969	0.70472	0.000419841	0.70472
SB_TransitionMatrix_4ac.TD2	SB_TransitionMatrix_4ac_TD2	symbolic,transitionmat	1415	737	-0.704275	0.000419841	0.704275
DN_FitKernelSmoothraw.area_020	DN_FitKernelSmooth_area_02	distribution,ksdensity,raw,spreaddep	944	570	-0.703924	0.000419841	0.703924
DN_FitKernelSmoothraw.area_030	DN_FitKernelSmooth_area_03	distribution,ksdensity,raw,spreaddep	945	570	-0.703924	0.000419841	0.703924
DN_FitKernelSmoothraw.area_010	DN_FitKernelSmooth_area_01	distribution,ksdensity,raw,spreaddep	943	570	-0.703924	0.000419841	0.703924
DN_FitKernelSmoothraw.area_005	DN_FitKernelSmooth_area_005	distribution,ksdensity,raw,spreaddep	942	570	-0.703924	0.000419841	0.703924
DN_FitKernelSmoothraw.area_050	DN_FitKernelSmooth_area_05	distribution,ksdensity,raw,spreaddep	947	570	-0.703924	0.000419841	0.703924
DN_FitKernelSmoothraw.area_040	DN_FitKernelSmooth_area_04	distribution,ksdensity,raw,spreaddep	946	570	-0.703924	0.000419841	0.703924
MF_ExpSmoothing_05_best.p3_5	MF_ExpSmoothing_05_best_p3_5	model	7515	1034	0.702961	0.000419841	0.702961
CO_StickAngles_y.statav3_n_s	CO_StickAngles_y_statav3_n_s	correlation,stationarity	1868	766	-0.702261	0.000419841	0.702261
DN_OutlierInclude_p_001.mfexpb	DN_OutlierInclude_p_001_mfexpb	distribution,outliers	3250	864	0.701883	0.000419841	0.701883
NL_TSTL_ReturnTime_005_1_005_n1_1_3.statrtys	NL_TSTL_ReturnTime_005_1_005_n1_1_3_statrtys	nonlinear,tstool	5788	948	-0.701609	0.000419841	0.701609
WL_coeffs_db3_3.wb1m	WL_coeffs_db3_3_wb1m	wavelet	6685	995	0.701593	0.000419841	0.701593
CO_glscf_2_5_tau	CO_glscf_2_5_tau	correlation,glscf	526	253	-0.701476	0.000419841	0.701476
EN_Randomize_permute.swss5_1fexpa	EN_Randomize_permute_swss5_1fexpa	entropy,slow,stationarity	2982	832	-0.699574	0.000419841	0.699574
CO_AddNoise_ac_gaussian.linfit_mse	CO_AddNoise_ac_gaussian_linfit_mse	correlation,AMI,entropy	1293	728	-0.699351	0.000419841	0.699351
SY_RangeEvolve.nuql50	SY_RangeEvolve_nuql50	stationarity	2221	494	0.699118	0.000419841	0.699118
PH_Walker_momentum_5.sw_taudiff	PH_Walker_momentum_5_sw_taudiff	trend	2668	818	0.698793	0.000419841	0.698793
FC_Surprise_dist_100_4_q_500.mean	FC_Surprise_dist_100_4_q_500_mean	information,symbolic	2258	778	0.697928	0.000419841	0.697928
SB_TransitionpAlphabet_40_1.meandiagfexp_a	SB_TransitionpAlphabet_40_1_meandiagfexp_a	symbolic,transitionmat	1447	739	0.697361	0.000419841	0.697361
MF_ExpSmoothing_05_best.ac2	MF_ExpSmoothing_05_best_ac2	model	7519	1034	-0.697127	0.000419841	0.697127
CO_glscf_1_1_tau	CO_glscf_1_1_tau	correlation,glscf	496	223	-0.697032	0.000419841	0.697032
CO_glscf_1_2_tau	CO_glscf_1_2_tau	correlation,glscf	502	229	-0.69703	0.000419841	0.69703
SY_LocalGlobal_l50.median	SY_LocalGlobal_median_l50	stationarity	788	497	0.696658	0.000419841	0.696658
NL_TSTL_acp_mi_1__10.macpf_3	NL_TSTL_acp_mi_1__10_macpf_3	nonlinear,correlation	5099	924	-0.694746	0.000419841	0.694746
CO_StickAngles_y.statav4_all_s	CO_StickAngles_y_statav4_all_s	correlation,stationarity	1876	766	-0.69291	0.000419841	0.69291
CO_AddNoise_ac_gaussian.fitlinb	CO_AddNoise_ac_gaussian_fitlinb	correlation,AMI,entropy	1292	728	-0.692342	0.000419841	0.692342
PP_Compare_resample_2_1.kscn_peaksepy	PP_Compare_resample_2_1_kscn_peaksepy	preprocessing,raw	6428	978	-0.691974	0.000419841	0.691974
NL_BoxCorrDim_50_ac_5.medianr15	NL_BoxCorrDim_50_ac_5_medianr15	nonlinear,correlation,tstool,dimension	5247	926	-0.690437	0.000419841	0.690437
CO_Embed2_Basic_tau.parabup01	CO_Embed2_Basic_tau_parabup01	correlation	1561	743	-0.689798	0.000419841	0.689798
MF_CompareTestSets_y_ar_4_rand_25_01_1.ac1s_median	MF_CompareTestSets_y_ar_4_rand_25_01_1_ac1s_median	model,prediction,stationarity	7167	1020	-0.688692	0.000419841	0.688692
SB_TransitionMatrix_5ac.stdeig	SB_TransitionMatrix_5ac_stdeig	symbolic,transitionmat	1440	738	0.688001	0.000419841	0.688001
WL_cwt_db3_32.stat_2_s_s	WL_cwt_db3_32_stat_2_s_s	wavelet,cwt	6607	989	-0.687467	0.000419841	0.687467
SY_LocalGlobal_p1.std	SY_LocalGlobal_std_p1	stationarity	779	502	0.687346	0.000419841	0.687346
NL_TSTL_acp_mi_1__10.macpf_1	NL_TSTL_acp_mi_1__10_macpf_1	nonlinear,correlation	5091	924	-0.686813	0.000419841	0.686813
SB_TransitionpAlphabet_20_ac.mineigfexp_b	SB_TransitionpAlphabet_20_ac_mineigfexp_b	symbolic,transitionmat	1510	740	-0.686655	0.000419841	0.686655
SY_RangeEvolve.l100	SY_RangeEvolve_l100	stationarity	2230	494	0.686134	0.000419841	0.686134
MF_StateSpace_n4sid_2_05_1.acmnd0	MF_StateSpace_n4sid_2_05_1_acmnd0	model	7306	1026	-0.685428	0.000419841	0.685428
NL_TSTL_GPCorrSum2_n1_05_100_20_ac_fnnmar.robfit_sea2	NL_TSTL_GPCorrSum2_n1_05_100_20_ac_fnnmar_robfit_sea2	nonlinear,correlation,tstool,stochastic	5286	928	-0.685174	0.000419841	0.685174
MF_CompareTestSets_y_ar_best_uniform_25_01_1.ac1s_median	MF_CompareTestSets_y_ar_best_uniform_25_01_1_ac1s_median	model,prediction,arfit,stationarity	7187	1021	-0.684473	0.000419841	0.684473
WL_cwt_sym2_32.stat_2_s_s	WL_cwt_sym2_32_stat_2_s_s	wavelet,cwt	6633	990	-0.684463	0.000419841	0.684463
CO_StickAngles_y.statav3_p_s	CO_StickAngles_y_statav3_p_s	correlation,stationarity	1866	766	-0.683633	0.000419841	0.683633
NL_BoxCorrDim_50_ac_5.meanr15	NL_BoxCorrDim_50_ac_5_meanr15	nonlinear,correlation,tstool,dimension	5246	926	-0.683496	0.000419841	0.683496
EN_DistributionEntropy_hist_10_002	EN_DistributionEntropy_hist_10_002	entropy	899	540	-0.683153	0.000419841	0.683153
DN_Quantile_70	quantile_70	distribution	74	71	0.682368	0.000419841	0.682368
SC_FluctAnal_2_iqr_50_logi.alpha	SC_FluctAnal_2_iqr_50_logi_alpha	scaling	3982	896	0.681961	0.000419841	0.681961
SY_SlidingWindow_lil_sampen2_10	SY_SlidingWindow_lil_sampen2_10	stationarity	704	431	0.681469	0.000419841	0.681469
WL_coeffs_db3_3.wb10m	WL_coeffs_db3_3_wb10m	wavelet	6684	995	0.680544	0.000419841	0.680544
CO_glscf_1_5_tau	CO_glscf_1_5_tau	correlation,glscf	508	235	-0.680373	0.000419841	0.680373
NL_TSTL_dimensions_50_ac_fnnmar.scr_co_m3_scaling_int	NL_TSTL_dimensions_50_ac_fnnmar_scr_co_m3_scaling_int	nonlinear,tstool,scaling,dimension	5437	932	-0.68014	0.000419841	0.68014
MF_armax_3_1_05_1.acsnd0	MF_armax_3_1_05_1_acsnd0	model	7420	1030	-0.679957	0.000419841	0.679957
MF_armax_3_1_05_1.propbth	MF_armax_3_1_05_1_propbth	model	7421	1030	0.678265	0.000419841	0.678265
NL_TSTL_acp_mi_1__10.sacpf_8	NL_TSTL_acp_mi_1__10_sacpf_8	nonlinear,correlation	5120	924	-0.677215	0.000419841	0.677215
DN_RemovePoints_max_01.fzcacrat	DN_RemovePoints_max_01_fzcacrat	correlation,outliers	1761	760	-0.67491	0.000419841	0.67491
SY_LocalGlobal_unicg10.kurtosis	SY_LocalGlobal_kurtosis_unicg10	stationarity	837	504	-0.67484	0.000419841	0.67484
MF_armax_1_1_05_1.ac3n	MF_armax_1_1_05_1_ac3n	model	7451	1031	-0.674525	0.000419841	0.674525
SB_TransitionMatrix_5ac.TD2	SB_TransitionMatrix_5ac_TD2	symbolic,transitionmat	1431	738	-0.674273	0.000419841	0.674273
NL_TSTL_ReturnTime_5_1_40_n1_1_8.statrtym	NL_TSTL_ReturnTime_5_1_40_n1_1_8_statrtym	nonlinear,tstool	5771	947	-0.673209	0.000419841	0.673209
WL_DetailCoeffs_db3_max.max_max	WL_DetailCoeffs_db3_max_max_max	wavelet	6642	992	-0.672603	0.000419841	0.672603
NL_TSTL_acp_1_001_025_10_05.macpf_2	NL_TSTL_acp_1_001_025_10_05_macpf_2	nonlinear,correlation	5147	925	-0.672306	0.000419841	0.672306
MF_StateSpace_n4sid_1_05_1.p1_5	MF_StateSpace_n4sid_1_05_1_p1_5	model	7257	1025	-0.671342	0.000419841	0.671342
DN_CompareKSFit_uni.adiff	DN_CompareKSFit_uni_adiff	distribution,ksdensity,raw,locdep	3183	856	-0.670156	0.000419841	0.670156
NL_TSTL_acp_1_001_025_10_05.macpf_3	NL_TSTL_acp_1_001_025_10_05_macpf_3	nonlinear,correlation	5151	925	-0.669049	0.000419841	0.669049
CO_StickAngles_y.q99_all	CO_StickAngles_y_q99_all	correlation	1903	766	-0.668927	0.000419841	0.668927
EN_Randomize_permute.d1fexpc	EN_Randomize_permute_d1fexpc	entropy,slow,lengthdep	2940	832	-0.665376	0.000419841	0.665376
SB_TransitionMatrix_5ac.mineig	SB_TransitionMatrix_5ac_mineig	symbolic,transitionmat	1442	738	-0.663782	0.000419841	0.663782
DN_RemovePoints_min_08.std	DN_RemovePoints_min_08_std	correlation,outliers	1758	759	-0.663332	0.000419841	0.663332
PH_ForcePotential_sine_1_1_1.pcross	PH_ForcePotential_sine_1_1_1_pcross	dynamicalSystem	1658	750	0.662825	0.000419841	0.662825
DN_OutlierInclude_p_001.stdrfexpb	DN_OutlierInclude_p_001_stdrfexpb	distribution,outliers	3272	864	0.662139	0.000419841	0.662139
SB_TransitionpAlphabet_20_ac.trfexp_a	SB_TransitionpAlphabet_20_ac_trfexp_a	symbolic,transitionmat	1488	740	0.659923	0.000419841	0.659923
PP_Compare_rav10.gauss1_kd_resAC2	PP_Compare_rav10_gauss1_kd_resAC2	preprocessing,raw	6363	976	-0.658025	0.000419841	0.658025
NL_BoxCorrDim_50_ac_5.meanchr11	NL_BoxCorrDim_50_ac_5_meanchr11	nonlinear,correlation,tstool,dimension	5233	926	0.657776	0.000419841	0.657776
NL_TSTL_GPCorrSum2_n1_05_40_20_ac_fnnmar.robfit_sigrat	NL_TSTL_GPCorrSum2_n1_05_40_20_ac_fnnmar_robfit_sigrat	nonlinear,correlation,tstool,stochastic	5269	927	0.657633	0.000419841	0.657633
CO_Embed2_Shapes_tau_circle_01.mode_val	CO_Embed2_Shapes_tau_circle_01_mode_val	correlation,embedding	1975	770	0.65746	0.000419841	0.65746
PP_Compare_diff1.olbt_s5	PP_Compare_diff1_olbt_s5	preprocessing,raw	6127	968	-0.655844	0.000419841	0.655844
CO_StickAngles_y.statav4_n_s	CO_StickAngles_y_statav4_n_s	correlation,stationarity	1874	766	-0.655648	0.000419841	0.655648
NL_TSTL_dimensions_50_ac_fnnmar.bc_minmmax	NL_TSTL_dimensions_50_ac_fnnmar_bc_minmmax	nonlinear,tstool,scaling,dimension	5338	932	0.655244	0.000419841	0.655244
NL_TSTL_dimensions_50_ac_fnnmar.co_minmmax	NL_TSTL_dimensions_50_ac_fnnmar_co_minmmax	nonlinear,tstool,scaling,dimension	5360	932	0.655199	0.000419841	0.655199
NL_TSTL_acp_1_001_025_10_05.macpf_4	NL_TSTL_acp_1_001_025_10_05_macpf_4	nonlinear,correlation	5155	925	-0.655188	0.000419841	0.655188
CO_StickAngles_y.q1_all	CO_StickAngles_y_q1_all	correlation	1900	766	0.654982	0.000419841	0.654982
SY_SpreadRandomLocal_50_100.stdkurt	SY_SpreadRandomLocal_50_100_stdkurt	stationarity	2122	478	-0.652628	0.000419841	0.652628
DN_CompareKSFit_uni.relent	DN_CompareKSFit_uni_relent	distribution,ksdensity,raw,locdep	3187	856	-0.652181	0.000419841	0.652181
SY_SpreadRandomLocal_200_100.stdsampen1_015	SY_SpreadRandomLocal_200_100_stdsampen1_015	stationarity	2155	480	-0.651846	0.000419841	0.651846
EN_Randomize_permute.swss5_1fexpb	EN_Randomize_permute_swss5_1fexpb	entropy,slow,stationarity	2983	832	0.651794	0.000419841	0.651794
SY_LocalGlobal_l100.std	SY_LocalGlobal_std_l100	stationarity	775	498	0.651575	0.000419841	0.651575
NL_TSTL_dimensions_50_ac_fnnmar.scr_bc_m3_scaling_exp	NL_TSTL_dimensions_50_ac_fnnmar_scr_bc_m3_scaling_exp	nonlinear,tstool,scaling,dimension	5400	932	0.651458	0.000419841	0.651458
SY_SpreadRandomLocal_ac2_100.stdkurt	SY_SpreadRandomLocal_ac2_100_stdkurt	stationarity	2090	476	-0.651369	0.000419841	0.651369
MF_StateSpace_n4sid_1_05_1.ac3	MF_StateSpace_n4sid_1_05_1_ac3	model	7264	1025	-0.650218	0.000419841	0.650218
PP_Compare_diff2.olbt_s5	PP_Compare_diff2_olbt_s5	preprocessing,raw	6158	969	-0.650084	0.000419841	0.650084
CO_StickAngles_y.statav4_p_s	CO_StickAngles_y_statav4_p_s	correlation,stationarity	1872	766	-0.649975	0.000419841	0.649975
DN_OutlierInclude_p_001.stdrfexpc	DN_OutlierInclude_p_001_stdrfexpc	distribution,outliers	3273	864	0.649116	0.000419841	0.649116
NL_TSTL_dimensions_50_ac_fnnmar.co_meanscalingexp	NL_TSTL_dimensions_50_ac_fnnmar_co_meanscalingexp	nonlinear,tstool,scaling,dimension	5453	932	-0.64896	0.000419841	0.64896
PH_Walker_runningvar_15_50.w_max	PH_Walker_runningvar_15_50_w_max	trend	2685	819	-0.64881	0.000419841	0.64881
NL_TSTL_dimensions_50_ac_fnnmar.scr_co_m3_minbad	NL_TSTL_dimensions_50_ac_fnnmar_scr_co_m3_minbad	nonlinear,tstool,scaling,dimension	5429	932	0.648609	0.000419841	0.648609
SB_TransitionMatrix_3ac.ondiag	SB_TransitionMatrix_3ac_ondiag	symbolic,transitionmat	1402	736	-0.647728	0.000419841	0.647728
AC_18	AC_18	correlation	110	109	0.646812	0.000419841	0.646812
NL_TSTL_acp_1_001_025_10_05.macpf_1	NL_TSTL_acp_1_001_025_10_05_macpf_1	nonlinear,correlation	5143	925	-0.646563	0.000419841	0.646563
ST_LocalExtrema_l50.zcext	ST_LocalExtrema_l50_zcext	distribution,stationarity	3324	866	0.645271	0.000419841	0.645271
CO_AddNoise_ac_std1_10.ac1	CO_AddNoise_ac_std1_10_ac1	correlation,AMI,entropy	1241	726	-0.644048	0.000419841	0.644048
MF_StateSpace_n4sid_1_05_1.p3_5	MF_StateSpace_n4sid_1_05_1_p3_5	model	7259	1025	0.64395	0.000419841	0.64395
DN_OutlierInclude_p_001.stdrfexpa	DN_OutlierInclude_p_001_stdrfexpa	distribution,outliers	3271	864	-0.643173	0.000419841	0.643173
CO_RM_AMInformation_0	RM_ami_0	information,correlation,AMI	191	195	0.642459	0.000419841	0.642459
NL_TSTL_LargestLyap_n1_01_001_3_mi_fnnmar.expfit_a	NL_TSTL_LargestLyap_n1_01_001_3_mi_fnnmar_expfit_a	nonlinear,tstool	5710	944	-0.642372	0.000419841	0.642372
SB_TransitionMatrix_3ac.stddiag	SB_TransitionMatrix_3ac_stddiag	symbolic,transitionmat	1403	736	0.641857	0.000419841	0.641857
NL_TSTL_acp_1_001_025_10_05.macpf_5	NL_TSTL_acp_1_001_025_10_05_macpf_5	nonlinear,correlation	5159	925	-0.64128	0.000419841	0.64128
SY_Trend.meanYC	SY_Trend_meanYC	stationarity	744	468	0.640677	0.000419841	0.640677
SY_Trend.intercept	SY_Trend_intercept	stationarity	743	468	0.640677	0.000419841	0.640677
SY_Trend.gradient	SY_Trend_gradient	stationarity	742	468	-0.640677	0.000419841	0.640677
TSTL_localdensity_5_40_ac_2.rangeden	TSTL_localdensity_5_40_ac_2_rangeden	nonlinear,tstool	5517	939	-0.640452	0.000419841	0.640452
CP_wavelet_varchg_sym2_4_10_001	CP_wavelet_varchg_sym2_4_10_001	wavelet,varchg	1059	662	-0.640417	0.000419841	0.640417
NL_TSTL_FractalDimensions_2_100_02_1_5_10_32_ac_5.rangeDq	NL_TSTL_FractalDimensions_2_100_02_1_5_10_32_ac_5_rangeDq	nonlinear,tstool,dimension,correlation,stochastic	5473	935	-0.640134	0.000419841	0.640134
WL_coeffs_db3_4.wb50m	WL_coeffs_db3_4_wb50m	wavelet	6692	996	0.63924	0.000419841	0.63924
PP_Compare_spline64.swss5_2	PP_Compare_spline64_swss5_2	preprocessing,raw,stationarity	6078	967	-0.638909	0.000419841	0.638909
DN_Quantile_10	quantile_10	distribution	68	65	-0.638663	0.000419841	0.638663
MF_armax_1_1_05_1.p3_5	MF_armax_1_1_05_1_p3_5	model	7443	1031	0.638266	0.000419841	0.638266
CO_Embed2_tau.eucds1	CO_Embed2_tau_eucds1	correlation,embedding	1928	767	0.637737	0.000419841	0.637737
NL_TSTL_ReturnTime_005_1_005_n1_1_3.hcgdist	NL_TSTL_ReturnTime_005_1_005_n1_1_3_hcgdist	nonlinear,tstool	5791	948	0.637142	0.000419841	0.637142
CO_AddNoise_ac_gaussian.ami_at_5	CO_AddNoise_ac_gaussian_ami_at_5	correlation,AMI,entropy	1283	728	-0.636497	0.000419841	0.636497
AC_12	AC_12	correlation	104	103	0.636472	0.000419841	0.636472
SY_LocalGlobal_unicg20.kurtosis	SY_LocalGlobal_kurtosis_unicg20	stationarity	838	505	-0.636201	0.000419841	0.636201
NL_TSTL_FractalDimensions_2_100_02_1_5_10_32_ac_5.linfit_a	NL_TSTL_FractalDimensions_2_100_02_1_5_10_32_ac_5_linfit_a	nonlinear,tstool,dimension,correlation,stochastic	5479	935	0.636041	0.000419841	0.636041
TSTL_localdensity_5_40_ac_2.maxden	TSTL_localdensity_5_40_ac_2_maxden	nonlinear,tstool	5515	939	-0.635627	0.000419841	0.635627
SY_LocalGlobal_p05.median	SY_LocalGlobal_median_p05	stationarity	792	501	0.634354	0.000419841	0.634354
TSTL_delaytime_01_1.tau3	TSTL_delaytime_01_1_tau3	nonlinear,correlation,tstool,tau	5324	931	0.634311	0.000419841	0.634311
MF_StateSpace_n4sid_1_05_1.ac2n	MF_StateSpace_n4sid_1_05_1_ac2n	model	7266	1025	-0.633675	0.000419841	0.633675
SY_SpreadRandomLocal_ac5_100.stdac2	SY_SpreadRandomLocal_ac5_100_stdac2	stationarity	2109	477	-0.633081	0.000419841	0.633081
MF_ExpSmoothing_05_best.sbc1	MF_ExpSmoothing_05_best_sbc1	model	7531	1034	0.632762	0.000419841	0.632762
PP_Compare_spline44.statav6	PP_Compare_spline44_statav6	preprocessing,raw,stationarity	6037	966	0.632042	0.000419841	0.632042
DN_max	maximum	distribution	14	3	-0.631894	0.000419841	0.631894
MF_armax_3_1_05_1.acmnd0	MF_armax_3_1_05_1_acmnd0	model	7419	1030	-0.631258	0.000419841	0.631258
CO_AddNoise_ac_gaussian.meanch	CO_AddNoise_ac_gaussian_meanch	correlation,AMI,entropy	1277	728	0.631183	0.000419841	0.631183
MF_ExpSmoothing_05_best.ac3n	MF_ExpSmoothing_05_best_ac3n	model	7523	1034	-0.630256	0.000419841	0.630256
MF_ExpSmoothing_05_best.ac1n	MF_ExpSmoothing_05_best_ac1n	model	7521	1034	-0.6301	0.000419841	0.6301
SC_FluctAnal_2_dfa_50_0_logi.alpha	SC_FluctAnal_2_dfa_50_0_logi_alpha	scaling	4054	899	0.630013	0.000419841	0.630013
NL_TSTL_acp_1_001_025_10_05.macpf_6	NL_TSTL_acp_1_001_025_10_05_macpf_6	nonlinear,correlation	5163	925	-0.629462	0.000419841	0.629462
NL_BoxCorrDim_50_ac_5.meanr16	NL_BoxCorrDim_50_ac_5_meanr16	nonlinear,correlation,tstool,dimension	5250	926	-0.627698	0.000419841	0.627698
NL_TSTL_FractalDimensions_2_100_02_1_5_10_32_ac_5.rangeq	NL_TSTL_FractalDimensions_2_100_02_1_5_10_32_ac_5_rangeq	nonlinear,tstool,dimension,correlation,stochastic	5477	935	0.627502	0.000419841	0.627502
SB_TransitionMatrix_4ac.maxeig	SB_TransitionMatrix_4ac_maxeig	symbolic,transitionmat	1424	737	0.627313	0.000419841	0.627313
MF_StateSpace_n4sid_1_05_1.minfpe	MF_StateSpace_n4sid_1_05_1_minfpe	model	7274	1025	0.62626	0.000419841	0.62626
PP_Compare_rav2.kscn_peaksepy	PP_Compare_rav2_kscn_peaksepy	preprocessing,raw	6273	973	-0.625955	0.000419841	0.625955
SY_LocalGlobal_l10.kurtosis	SY_LocalGlobal_kurtosis_l10	stationarity	828	495	-0.625814	0.000419841	0.625814
SC_FluctAnal_2_dfa_50_1_2_logi.alpha	SC_FluctAnal_2_dfa_50_1_2_logi_alpha	scaling	4150	903	0.625199	0.000419841	0.625199
SC_FluctAnal_2_std_50_logi.alpha	SC_FluctAnal_2_std_50_logi_alpha	scaling	3958	895	0.62499	0.000419841	0.62499
WL_dwtcoeff_db3_5.maxd_l3	WL_dwtcoeff_db3_5_maxd_l3	wavelet,dwt	6727	1000	-0.624033	0.000419841	0.624033
SB_TransitionMatrix_5ac.maxeig	SB_TransitionMatrix_5ac_maxeig	symbolic,transitionmat	1441	738	0.62385	0.000419841	0.62385
SD_TSTL_surrogates_mi_100_1_trev.ksiqrsfrommode	SD_TSTL_surrogates_mi_100_1_trev_ksiqrsfrommode	nonlinear,tstool,correlation,surrogate	5851	956	-0.623212	0.000419841	0.623212
NL_TISEAN_c1_1_1_7_002_05.bestestdstd	NL_TISEAN_c1_1_1_7_002_05_bestestdstd	nonlinear,tisean,dimension,entropy	5058	922	-0.622528	0.000419841	0.622528
FC_LocalSimple_lfit4.tauresrat	FC_LocalSimple_lfit4_tauresrat	forecasting	3117	844	-0.622492	0.000419841	0.622492
NL_TSTL_FractalDimensions_2_100_02_1_5_10_32_ac_5.maxDq	NL_TSTL_FractalDimensions_2_100_02_1_5_10_32_ac_5_maxDq	nonlinear,tstool,dimension,correlation,stochastic	5474	935	-0.622489	0.000419841	0.622489
MF_ExpSmoothing_05_best.p4_5	MF_ExpSmoothing_05_best_p4_5	model	7516	1034	0.622265	0.000419841	0.622265
NL_TSTL_dimensions_50_ac_fnnmar.scr_co_m3_meansqres	NL_TSTL_dimensions_50_ac_fnnmar_scr_co_m3_meansqres	nonlinear,tstool,scaling,dimension	5435	932	-0.621623	0.000419841	0.621623
DN_OutlierInclude_n_001.mfexpc	DN_OutlierInclude_n_001_mfexpc	distribution,outliers	3282	865	0.621395	0.000419841	0.621395
MF_StateSpace_n4sid_1_05_1.propbth	MF_StateSpace_n4sid_1_05_1_propbth	model	7270	1025	0.621358	0.000419841	0.621358
PH_Walker_prop_09.w_tau	PH_Walker_prop_09_w_tau	trend	2563	813	0.620923	0.000419841	0.620923
CO_StickAngles_y.statav5_all_s	CO_StickAngles_y_statav5_all_s	correlation,stationarity	1882	766	-0.619579	0.000419841	0.619579
NL_TSTL_acp_1_001_025_10_05.macpf_7	NL_TSTL_acp_1_001_025_10_05_macpf_7	nonlinear,correlation	5167	925	-0.61943	0.000419841	0.61943
CO_TranslateShape_circle_25_pts.statav2_m	CO_TranslateShape_circle_25_pts_statav2_m	correlation,stationarity	1805	763	-0.619323	0.000419841	0.619323
SD_TSTL_surrogates_mi_100_1_trev.iqrsfrommedian	SD_TSTL_surrogates_mi_100_1_trev_iqrsfrommedian	nonlinear,tstool,correlation,surrogate	5846	956	-0.619278	0.000419841	0.619278
CO_AddNoise_ac_std1_10.ac2	CO_AddNoise_ac_std1_10_ac2	correlation,AMI,entropy	1242	726	-0.618905	0.000419841	0.618905
NL_TSTL_FractalDimensions_2_100_02_1_5_10_32_ac_5.linfit_b	NL_TSTL_FractalDimensions_2_100_02_1_5_10_32_ac_5_linfit_b	nonlinear,tstool,dimension,correlation,stochastic	5480	935	-0.618765	0.000419841	0.618765
SP_Summaries_fft_logdev.spect_shann_ent_norm	SP_Summaries_fft_logdev_spect_shann_ent_norm	spectral	4687	911	0.618189	0.000419841	0.618189
SP_Summaries_fft_logdev.spect_shann_ent	SP_Summaries_fft_logdev_spect_shann_ent	spectral	4686	911	0.618189	0.000419841	0.618189
NL_TSTL_ReturnTime_005_1_005_n1_1_3.hhist	NL_TSTL_ReturnTime_005_1_005_n1_1_3_hhist	nonlinear,tstool	5790	948	0.618082	0.000419841	0.618082
MF_StateSpace_n4sid_1_05_1.acsnd0	MF_StateSpace_n4sid_1_05_1_acsnd0	model	7269	1025	-0.617499	0.000419841	0.617499
DN_OutlierInclude_abs_001.mfexprmse	DN_OutlierInclude_abs_001_mfexprmse	distribution,outliers	3222	863	-0.617093	0.000419841	0.617093
SC_FluctAnal_2_range_50_logi.alpha	SC_FluctAnal_2_range_50_logi_alpha	scaling	3934	894	0.617076	0.000419841	0.617076
DN_OutlierInclude_p_001.nfla	DN_OutlierInclude_p_001_nfla	distribution,outliers	3259	864	-0.616848	0.000419841	0.616848
MF_armax_1_1_05_1.ac2n	MF_armax_1_1_05_1_ac2n	model	7450	1031	-0.616549	0.000419841	0.616549
FC_LocalSimple_median3.tauresrat	FC_LocalSimple_median3_tauresrat	forecasting	3068	839	-0.616313	0.000419841	0.616313
NL_BoxCorrDim_50_ac_5.iqrstretch	NL_BoxCorrDim_50_ac_5_iqrstretch	nonlinear,correlation,tstool,dimension	5266	926	-0.616173	0.000419841	0.616173
SB_TransitionpAlphabet_20_ac.trfexp_rmse	SB_TransitionpAlphabet_20_ac_trfexp_rmse	symbolic,transitionmat	1491	740	0.616037	0.000419841	0.616037
SB_TransitionpAlphabet_20_ac.maxeig_fexprmse	SB_TransitionpAlphabet_20_ac_maxeig_fexprmse	symbolic,transitionmat	1508	740	0.615363	0.000419841	0.615363
NL_TSTL_acp_mi_1__10.stdmacpfdiff	NL_TSTL_acp_mi_1__10_stdmacpfdiff	nonlinear,correlation	5080	924	-0.615261	0.000419841	0.615261
NL_TSTL_dimensions_50_ac_fnnmar.scr_co_m3_logrrange	NL_TSTL_dimensions_50_ac_fnnmar_scr_co_m3_logrrange	nonlinear,tstool,scaling,dimension	5432	932	0.614825	0.000419841	0.614825
SB_TransitionpAlphabet_20_ac.stdeigfexp_b	SB_TransitionpAlphabet_20_ac_stdeigfexp_b	symbolic,transitionmat	1502	740	0.614463	0.000419841	0.614463
CO_StickAngles_y.statav5_n_s	CO_StickAngles_y_statav5_n_s	correlation,stationarity	1880	766	-0.614292	0.000419841	0.614292
SB_TransitionpAlphabet_20_ac.maxeig_fexpr2	SB_TransitionpAlphabet_20_ac_maxeig_fexpr2	symbolic,transitionmat	1507	740	-0.614263	0.000419841	0.614263
EN_mse_1-10_2_015.sampen_s3	EN_mse_1-10_2_015_sampen_s3	entropy,sampen,mse	2748	827	0.61345	0.000419841	0.61345
CO_StickAngles_y.statav3_all_s	CO_StickAngles_y_statav3_all_s	correlation,stationarity	1870	766	-0.611355	0.000419841	0.611355
PP_Compare_resample_1_2.kscn_peaksepy	PP_Compare_resample_1_2_kscn_peaksepy	preprocessing,raw	6397	977	-0.611035	0.000419841	0.611035
NL_TSTL_GPCorrSum2_n1_05_100_20_ac_fnnmar.robfit_sigrat	NL_TSTL_GPCorrSum2_n1_05_100_20_ac_fnnmar_robfit_sigrat	nonlinear,correlation,tstool,stochastic	5283	928	0.610612	0.000419841	0.610612
MF_StateSpace_n4sid_1_05_1.acmnd0	MF_StateSpace_n4sid_1_05_1_acmnd0	model	7268	1025	-0.610089	0.000419841	0.610089
MF_FitSubsegments_ar_2_uniform_25_01.a_2_std	MF_FitSubsegments_ar_2_uniform_25_01_a_2_std	model,prediction	7128	1017	-0.609979	0.000419841	0.609979
NL_TSTL_acp_1_001_025_10_05.macpf_8	NL_TSTL_acp_1_001_025_10_05_macpf_8	nonlinear,correlation	5171	925	-0.608938	0.000419841	0.608938
WL_coeffs_db3_4.wb75m	WL_coeffs_db3_4_wb75m	wavelet	6691	996	0.607647	0.000419841	0.607647
NL_TSTL_acp_1_001_025_10_05.sacpf_1	NL_TSTL_acp_1_001_025_10_05_sacpf_1	nonlinear,correlation	5144	925	-0.60738	0.000419841	0.60738
NL_TSTL_acp_1_001_025_10_05.macpf_10	NL_TSTL_acp_1_001_025_10_05_macpf_10	nonlinear,correlation	5179	925	-0.607233	0.000419841	0.607233
NL_TSTL_FractalDimensions_2_100_02_1_5_10_32_ac_5.meanq	NL_TSTL_FractalDimensions_2_100_02_1_5_10_32_ac_5_meanq	nonlinear,tstool,dimension,correlation,stochastic	5478	935	-0.606733	0.000419841	0.606733
DN_Quantile_99	quantile_99	distribution	85	82	-0.604946	0.000419841	0.604946
SY_KPSStest_0_10.minstat	SY_KPSStest_0_10_minstat	stationarity,hypothesistest	7715	1047	0.604214	0.000419841	0.604214
DN_RemovePoints_min_05.ac2diff	DN_RemovePoints_min_05_ac2diff	correlation,outliers	1743	758	0.603755	0.000419841	0.603755
NL_TSTL_acp_1_001_025_10_05.macpf_9	NL_TSTL_acp_1_001_025_10_05_macpf_9	nonlinear,correlation	5175	925	-0.603626	0.000419841	0.603626
SB_BinaryStats_mean.stdstretchdiff	SB_BinaryStats_mean_stdstretchdiff	distribution,stationarity	3484	876	0.60325	0.000419841	0.60325
CO_StickAngles_y.statav5_p_s	CO_StickAngles_y_statav5_p_s	correlation,stationarity	1878	766	-0.603185	0.000419841	0.603185
SD_TSTL_surrogates_mi_100_1_trev.normpatponmax	SD_TSTL_surrogates_mi_100_1_trev_normpatponmax	nonlinear,tstool,correlation,surrogate	5845	956	0.602697	0.000419841	0.602697
CO_trev_3.absnum	CO_trev_3_absnum	correlation,nonlinear	1132	710	-0.602591	0.000419841	0.602591
SB_TransitionpAlphabet_20_ac.maxeig_fexpb	SB_TransitionpAlphabet_20_ac_maxeig_fexpb	symbolic,transitionmat	1506	740	0.602139	0.000419841	0.602139
SB_TransitionMatrix_4ac.stddiag	SB_TransitionMatrix_4ac_stddiag	symbolic,transitionmat	1419	737	0.601865	0.000419841	0.601865
MF_CompareTestSets_y_ss_2_uniform_25_01_1.ac1s_median	MF_CompareTestSets_y_ss_2_uniform_25_01_1_ac1s_median	model,prediction,stationarity	7227	1023	-0.601371	0.000419841	0.601371
DN_OutlierInclude_abs_001.stdrflrmse	DN_OutlierInclude_abs_001_stdrflrmse	distribution,outliers	3248	863	0.601276	0.000419841	0.601276
NL_TSTL_FractalDimensions_2_100_02_1_5_10_32_ac_5.meanDq	NL_TSTL_FractalDimensions_2_100_02_1_5_10_32_ac_5_meanDq	nonlinear,tstool,dimension,correlation,stochastic	5475	935	-0.600981	0.000419841	0.600981
PH_ForcePotential_sine_10_004_10.ac10	PH_ForcePotential_sine_10_004_10_ac10	dynamicalSystem	1671	751	0.600905	0.000419841	0.600905
SD_TSTL_surrogates_mi_100_1_trev.ksphereonmax	SD_TSTL_surrogates_mi_100_1_trev_ksphereonmax	nonlinear,tstool,correlation,surrogate	5850	956	0.600887	0.000419841	0.600887
MF_armax_3_1_05_1.ac3	MF_armax_3_1_05_1_ac3	model	7415	1030	-0.600273	0.000419841	0.600273
TSTL_localdensity_5_40_ac_2.iqrden	TSTL_localdensity_5_40_ac_2_iqrden	nonlinear,tstool	5516	939	-0.599864	0.000419841	0.599864
MF_armax_1_1_05_1.ac3	MF_armax_1_1_05_1_ac3	model	7448	1031	-0.599592	0.000419841	0.599592
PP_Compare_spline64.olbt_m5	PP_Compare_spline64_olbt_m5	preprocessing,raw	6094	967	-0.598694	0.000419841	0.598694
NL_TSTL_ReturnTime_10_1_1_n1_ac_8.iqr	NL_TSTL_ReturnTime_10_1_1_n1_ac_8_iqr	nonlinear,tstool	5746	946	0.59825	0.000419841	0.59825
SD_TSTL_surrogates_mi_100_2_trev.ksiqrsfrommode	SD_TSTL_surrogates_mi_100_2_trev_ksiqrsfrommode	nonlinear,tstool,correlation,surrogate	5865	958	-0.597971	0.000419841	0.597971
MF_hmm_CompareNStates_06_24.meandiffLLtt	MF_hmm_CompareNStates_06_24_meandiffLLtt	hmm,model	7751	1050	-0.597938	0.000419841	0.597938
ST_LocalExtrema_n50.uord	ST_LocalExtrema_n50_uord	distribution,stationarity	3394	869	-0.597667	0.000419841	0.597667
SY_SpreadRandomLocal_ac5_100.stdskew	SY_SpreadRandomLocal_ac5_100_stdskew	stationarity	2105	477	-0.597047	0.000419841	0.597047
MF_StateSpace_n4sid_1_05_1.ac2	MF_StateSpace_n4sid_1_05_1_ac2	model	7263	1025	-0.595563	0.000419841	0.595563
NL_TSTL_GPCorrSum2_n1_05_100_20_ac_fnnmar.rangelnCr	NL_TSTL_GPCorrSum2_n1_05_100_20_ac_fnnmar_rangelnCr	nonlinear,correlation,tstool,stochastic	5293	928	-0.594515	0.000419841	0.594515
SB_TransitionpAlphabet_20_ac.maxeig_fexpa	SB_TransitionpAlphabet_20_ac_maxeig_fexpa	symbolic,transitionmat	1505	740	-0.594349	0.000419841	0.594349
SD_TSTL_surrogates_mi_100_2_trev.iqrsfrommedian	SD_TSTL_surrogates_mi_100_2_trev_iqrsfrommedian	nonlinear,tstool,correlation,surrogate	5860	958	-0.594251	0.000419841	0.594251
MF_armax_1_1_05_1.propbth	MF_armax_1_1_05_1_propbth	model	7454	1031	0.593783	0.000419841	0.593783
PP_Compare_rav4.kscn_olapint	PP_Compare_rav4_kscn_olapint	preprocessing,raw	6337	975	0.592829	0.000419841	0.592829
SB_TransitionMatrix_3ac.symsumdiff	SB_TransitionMatrix_3ac_symsumdiff	symbolic,transitionmat	1405	736	0.592575	0.000419841	0.592575
EN_DistributionEntropy_hist_fd_0	EN_DistributionEntropy_hist_fd_0	entropy	896	537	0.592185	0.000419841	0.592185
DN_OutlierInclude_p_001.stdrflr2	DN_OutlierInclude_p_001_stdrflr2	distribution,outliers	3278	864	-0.59155	0.000419841	0.59155
SY_SlidingWindow_lil_s2_10	SY_SlidingWindow_lil_s2_10	stationarity	697	424	0.590836	0.000419841	0.590836
SY_SpreadRandomLocal_200_100.stdtaul	SY_SpreadRandomLocal_200_100_stdtaul	stationarity	2158	480	0.590057	0.000419841	0.590057
PP_Compare_rav3.kscn_peaksepy	PP_Compare_rav3_kscn_peaksepy	preprocessing,raw	6304	974	-0.589895	0.000419841	0.589895
CO_TranslateShape_circle_25_pts.statav3_m	CO_TranslateShape_circle_25_pts_statav3_m	correlation,stationarity	1807	763	-0.589422	0.000419841	0.589422
CO_StickAngles_y.q99_n	CO_StickAngles_y_q99_n	correlation	1899	766	-0.589047	0.000419841	0.589047
MF_armax_1_1_05_1.minfpe	MF_armax_1_1_05_1_minfpe	model	7458	1031	0.588971	0.000419841	0.588971
SB_TransitionMatrix_5ac.symsumdiff	SB_TransitionMatrix_5ac_symsumdiff	symbolic,transitionmat	1438	738	0.588282	0.000419841	0.588282
CO_StickAngles_y.kurtosis_n	CO_StickAngles_y_kurtosis_n	correlation	1908	766	-0.588275	0.000419841	0.588275
WL_coeffs_db3_5.wb50m	WL_coeffs_db3_5_wb50m	wavelet	6702	997	0.588271	0.000419841	0.588271
SB_TransitionMatrix_4ac.symsumdiff	SB_TransitionMatrix_4ac_symsumdiff	symbolic,transitionmat	1421	737	0.588265	0.000419841	0.588265
MF_armax_1_1_05_1.acmnd0	MF_armax_1_1_05_1_acmnd0	model	7452	1031	-0.588238	0.000419841	0.588238
SB_TransitionpAlphabet_20_ac.trfexp_r2	SB_TransitionpAlphabet_20_ac_trfexp_r2	symbolic,transitionmat	1490	740	-0.587936	0.000419841	0.587936
NL_TSTL_ReturnTime_5_1_40_n1_1_8.max	NL_TSTL_ReturnTime_5_1_40_n1_1_8_max	nonlinear,tstool	5760	947	0.587639	0.000419841	0.587639
DN_OutlierInclude_abs_001.nfexprmse	DN_OutlierInclude_abs_001_nfexprmse	distribution,outliers	3227	863	0.587613	0.000419841	0.587613
NL_BoxCorrDim_50_ac_5.minstretch	NL_BoxCorrDim_50_ac_5_minstretch	nonlinear,correlation,tstool,dimension	5265	926	0.587456	0.000419841	0.587456
SB_TransitionpAlphabet_20_ac.mineigfexp_rmse	SB_TransitionpAlphabet_20_ac_mineigfexp_rmse	symbolic,transitionmat	1512	740	0.587242	0.000419841	0.587242
CO_FirstZero_ac	first_zero_ac	correlation,tau	133	132	0.587205	0.000419841	0.587205
CO_tc3_ac.num	CO_tc3_ac_num	correlation,nonlinear	1111	706	-0.586401	0.000419841	0.586401
NL_BoxCorrDim_50_ac_5.minr18	NL_BoxCorrDim_50_ac_5_minr18	nonlinear,correlation,tstool,dimension	5260	926	0.586315	0.000419841	0.586315
MF_ExpSmoothing_05_best.acmnd0	MF_ExpSmoothing_05_best_acmnd0	model	7524	1034	-0.585818	0.000419841	0.585818
AC_19	AC_19	correlation	111	110	0.585762	0.000419841	0.585762
CO_glscf_1_10_tau	CO_glscf_1_10_tau	correlation,glscf	514	241	-0.5857	0.000419841	0.5857
SC_FluctAnal_2_endptdiff_50_logi.se1	SC_FluctAnal_2_endptdiff_50_logi_se1	scaling	3911	893	0.584769	0.000419841	0.584769
SC_FluctAnal_2_endptdiff_50_logi.se2	SC_FluctAnal_2_endptdiff_50_logi_se2	scaling	3912	893	0.584769	0.000419841	0.584769
MF_armax_1_1_05_1.acsnd0	MF_armax_1_1_05_1_acsnd0	model	7453	1031	-0.58475	0.000419841	0.58475
SY_LocalGlobal_unicg50.kurtosis	SY_LocalGlobal_kurtosis_unicg50	stationarity	839	506	-0.584566	0.000419841	0.584566
ST_LocalExtrema_n50.medianext	ST_LocalExtrema_n50_medianext	distribution,stationarity	3386	869	-0.583835	0.000419841	0.583835
NL_BoxCorrDim_50_ac_5.minr17	NL_BoxCorrDim_50_ac_5_minr17	nonlinear,correlation,tstool,dimension	5256	926	0.583441	0.000419841	0.583441
EN_DistributionEntropy_hist_auto_002	EN_DistributionEntropy_hist_auto_002	entropy	905	546	-0.583034	0.000419841	0.583034
NL_TSTL_GPCorrSum2_n1_05_40_20_ac_fnnmar.rangelnCr	NL_TSTL_GPCorrSum2_n1_05_40_20_ac_fnnmar_rangelnCr	nonlinear,correlation,tstool,stochastic	5279	927	-0.583025	0.000419841	0.583025
PP_Compare_diff1.swms10_1	PP_Compare_diff1_swms10_1	preprocessing,raw,stationarity	6105	968	-0.582294	0.000419841	0.582294
NL_TSTL_dimensions_50_ac_fnnmar.bc_meandiff	NL_TSTL_dimensions_50_ac_fnnmar_bc_meandiff	nonlinear,tstool,scaling,dimension	5340	932	-0.58185	0.000419841	0.58185
NL_TSTL_dimensions_50_ac_fnnmar.bc_meanm2	NL_TSTL_dimensions_50_ac_fnnmar_bc_meanm2	nonlinear,tstool,scaling,dimension	5332	932	-0.581685	0.000419841	0.581685
NL_TSTL_acp_mi_1__10.iqracpf_2	NL_TSTL_acp_mi_1__10_iqracpf_2	nonlinear,correlation	5097	924	-0.58149	0.000419841	0.58149
ST_LocalExtrema_n50.meanext	ST_LocalExtrema_n50_meanext	distribution,stationarity	3383	869	-0.581385	0.000419841	0.581385
EN_DistributionEntropy_hist_auto_001	EN_DistributionEntropy_hist_auto_001	entropy	904	545	-0.580916	0.000419841	0.580916
TSTL_localdensity_5_40_ac_fnnmar.maxden	TSTL_localdensity_5_40_ac_fnnmar_maxden	nonlinear,tstool	5501	938	-0.580144	0.000419841	0.580144
NL_TSTL_ReturnTime_5_1_40_n1_1_8.hcgdist	NL_TSTL_ReturnTime_5_1_40_n1_1_8_hcgdist	nonlinear,tstool	5773	947	0.579836	0.000419841	0.579836
MF_armax_1_1_05_1.ac2	MF_armax_1_1_05_1_ac2	model	7447	1031	-0.579645	0.000419841	0.579645
NL_TSTL_dimensions_50_ac_fnnmar.bc_minm2	NL_TSTL_dimensions_50_ac_fnnmar_bc_minm2	nonlinear,tstool,scaling,dimension	5336	932	-0.579491	0.000419841	0.579491
ST_LocalExtrema_n25.zcext	ST_LocalExtrema_n25_zcext	distribution,stationarity	3368	868	0.579045	0.000419841	0.579045
NL_BoxCorrDim_50_ac_5.mediand5	NL_BoxCorrDim_50_ac_5_mediand5	nonlinear,correlation,tstool,dimension	5193	926	-0.578895	0.000419841	0.578895
PP_Compare_medianf4.kscn_peaksepy	PP_Compare_medianf4_kscn_peaksepy	preprocessing,raw	6211	971	-0.578795	0.000419841	0.578795
EN_Randomize_permute.swss5_1fexpc	EN_Randomize_permute_swss5_1fexpc	entropy,slow,stationarity	2984	832	0.578536	0.000419841	0.578536
SY_SpreadRandomLocal_ac2_100.stdac1	SY_SpreadRandomLocal_ac2_100_stdac1	stationarity	2092	476	-0.577237	0.000419841	0.577237
NL_TSTL_dimensions_50_ac_fnnmar.co_lfitmmax	NL_TSTL_dimensions_50_ac_fnnmar_co_lfitmmax	nonlinear,tstool,scaling,dimension	5366	932	-0.577151	0.000419841	0.577151
PP_Compare_spline64.kscn_adiff	PP_Compare_spline64_kscn_adiff	preprocessing,raw	6086	967	-0.577105	0.000419841	0.577105
SY_LocalGlobal_l20.median	SY_LocalGlobal_median_l20	stationarity	787	496	0.57637	0.000419841	0.57637
SY_RangeEvolve.l50	SY_RangeEvolve_l50	stationarity	2229	494	0.575806	0.000419841	0.575806
SC_FluctAnal_2_endptdiff_50_logi.alpha	SC_FluctAnal_2_endptdiff_50_logi_alpha	scaling	3910	893	0.575617	0.000419841	0.575617
FC_LocalSimple_mean4.tauresrat	FC_LocalSimple_mean4_tauresrat	forecasting	3027	836	-0.575026	0.000419841	0.575026
CO_StickAngles_y.q1_n	CO_StickAngles_y_q1_n	correlation	1896	766	0.574875	0.000419841	0.574875
SD_TSTL_surrogates_mi_100_2_trev.normpatponmax	SD_TSTL_surrogates_mi_100_2_trev_normpatponmax	nonlinear,tstool,correlation,surrogate	5859	958	0.574675	0.000419841	0.574675
NL_BoxCorrDim_50_ac_5.minr16	NL_BoxCorrDim_50_ac_5_minr16	nonlinear,correlation,tstool,dimension	5252	926	0.5739	0.000419841	0.5739
SD_TSTL_surrogates_mi_100_2_trev.ksphereonmax	SD_TSTL_surrogates_mi_100_2_trev_ksphereonmax	nonlinear,tstool,correlation,surrogate	5864	958	0.572983	0.000419841	0.572983
PP_Compare_diff1.statav8	PP_Compare_diff1_statav8	preprocessing,raw,stationarity	6100	968	-0.572828	0.000419841	0.572828
NL_TSTL_dimensions_50_ac_fnnmar.bc_meanm3	NL_TSTL_dimensions_50_ac_fnnmar_bc_meanm3	nonlinear,tstool,scaling,dimension	5333	932	-0.572728	0.000419841	0.572728
PP_Compare_spline44.swss5_2	PP_Compare_spline44_swss5_2	preprocessing,raw,stationarity	6047	966	-0.572102	0.000419841	0.572102
EN_Randomize_permute.d1fexpb	EN_Randomize_permute_d1fexpb	entropy,slow	2939	832	-0.571504	0.000419841	0.571504
DN_OutlierInclude_abs_001.stdrfexprmse	DN_OutlierInclude_abs_001_stdrfexprmse	distribution,outliers	3244	863	-0.570849	0.000419841	0.570849
WL_DetailCoeffs_db3_max.std_max	WL_DetailCoeffs_db3_max_std_max	wavelet	6645	992	-0.570682	0.000419841	0.570682
DN_RemovePoints_absfar_08.fzcacrat	DN_RemovePoints_absfar_08_fzcacrat	correlation,outliers	1720	756	-0.57036	0.000419841	0.57036
NL_TSTL_acp_mi_1__10.sacpf_7	NL_TSTL_acp_mi_1__10_sacpf_7	nonlinear,correlation	5116	924	-0.570149	0.000419841	0.570149
CO_Embed2_tau.areas_all	CO_Embed2_tau_areas_all	correlation,embedding	1937	767	-0.570143	0.000419841	0.570143
NL_TSTL_dimensions_50_ac_fnnmar.bc_meanscalingexp	NL_TSTL_dimensions_50_ac_fnnmar_bc_meanscalingexp	nonlinear,tstool,scaling,dimension	5449	932	-0.570002	0.000419841	0.570002
DN_FitKernelSmoothzscore.entropy	DN_FitKernelSmoothzscore_entropy	distribution,ksdensity,entropy	931	571	0.569858	0.000419841	0.569858
DN_OutlierInclude_p_001.mfexprmse	DN_OutlierInclude_p_001_mfexprmse	distribution,outliers	3253	864	-0.568341	0.000419841	0.568341
PP_Compare_diff1.statav10	PP_Compare_diff1_statav10	preprocessing,raw,stationarity	6101	968	-0.568099	0.000419841	0.568099
ST_LocalExtrema_n25.uord	ST_LocalExtrema_n25_uord	distribution,stationarity	3372	868	-0.567938	0.000419841	0.567938
CO_TranslateShape_circle_25_pts.statav4_m	CO_TranslateShape_circle_25_pts_statav4_m	correlation,stationarity	1809	763	-0.567617	0.000419841	0.567617
SY_SlidingWindow_lil_s2_2	SY_SlidingWindow_lil_s2_2	stationarity	696	423	0.567244	0.000419841	0.567244
MF_FitSubsegments_arsbc_rand_25_01.sbcs_std	MF_FitSubsegments_arsbc_rand_25_01_sbcs_std	model,prediction,arfit	7115	1016	-0.565844	0.000419841	0.565844
PH_Walker_prop_09.w_max	PH_Walker_prop_09_w_max	trend	2565	813	-0.565843	0.000419841	0.565843
NL_BoxCorrDim_50_ac_5.meanchr3	NL_BoxCorrDim_50_ac_5_meanchr3	nonlinear,correlation,tstool,dimension	5201	926	-0.565666	0.000419841	0.565666
SD_TSTL_surrogates_mi_100_1_trev.kspminfromext	SD_TSTL_surrogates_mi_100_1_trev_kspminfromext	nonlinear,tstool,correlation,surrogate	5849	956	0.565497	0.000419841	0.565497
PP_Compare_rav4.kscn_peaksepy	PP_Compare_rav4_kscn_peaksepy	preprocessing,raw	6335	975	-0.565418	0.000419841	0.565418
MF_ExpSmoothing_05_best.ac1	MF_ExpSmoothing_05_best_ac1	model	7518	1034	-0.564833	0.000419841	0.564833
EN_Randomize_statdist.d1fexpc	EN_Randomize_statdist_d1fexpc	entropy,slow,lengthdep	2814	830	-0.564774	0.000419841	0.564774
FC_LoopLocalSimple_mean.sws_fexp_b	FC_LoopLocalSimple_mean_sws_fexp_b	forecasting	3046	838	-0.564773	0.000419841	0.564773
MF_ExpSmoothing_05_best.dwts	MF_ExpSmoothing_05_best_dwts	model	7528	1034	0.564478	0.000419841	0.564478
CO_Embed2_Basic_tau.parabdown01_n1	CO_Embed2_Basic_tau_parabdown01_n1	correlation	1571	743	0.563043	0.000419841	0.563043
NL_TSTL_dimensions_50_ac_fnnmar.co_lfitmeansqdev2	NL_TSTL_dimensions_50_ac_fnnmar_co_lfitmeansqdev2	nonlinear,tstool,scaling,dimension	5372	932	-0.562761	0.000419841	0.562761
DN_OutlierInclude_abs_001.stdrfexpr2	DN_OutlierInclude_abs_001_stdrfexpr2	distribution,outliers	3243	863	0.562545	0.000419841	0.562545
ST_LocalExtrema_l50.uord	ST_LocalExtrema_l50_uord	distribution,stationarity	3328	866	-0.561153	0.000419841	0.561153
AC_11	AC_11	correlation	103	102	0.560105	0.000419841	0.560105
SB_TransitionMatrix_5ac.stddiag	SB_TransitionMatrix_5ac_stddiag	symbolic,transitionmat	1436	738	0.559953	0.000419841	0.559953
WL_coeffs_db3_3.wb25m	WL_coeffs_db3_3_wb25m	wavelet	6683	995	0.559824	0.000419841	0.559824
MF_FitSubsegments_arsbc_uniform_25_01.sbcs_std	MF_FitSubsegments_arsbc_uniform_25_01_sbcs_std	model,prediction,arfit	7104	1015	-0.559792	0.000419841	0.559792
DN_OutlierInclude_n_001.xcmerrn1	DN_OutlierInclude_n_001_xcmerrn1	distribution,outliers	3300	865	0.559639	0.000419841	0.559639
SD_TSTL_surrogates_1_100_1_tc3.ksiqrsfrommode	SD_TSTL_surrogates_1_100_1_tc3_ksiqrsfrommode	nonlinear,tstool,correlation,surrogate	5802	949	-0.559485	0.000419841	0.559485
SP_Summaries_fft_logdev.ac1	SP_Summaries_fft_logdev_ac1	spectral	4663	911	-0.559243	0.000419841	0.559243
ST_LocalExtrema_n50.medianrat	ST_LocalExtrema_n50_medianrat	distribution,stationarity	3377	869	-0.558983	0.000419841	0.558983
SY_LocalGlobal_p01.kurtosis	SY_LocalGlobal_kurtosis_p01	stationarity	833	500	-0.558645	0.000419841	0.558645
SC_FluctAnal_sign_2_dfa_50_2_logi.logtausplit	SC_FluctAnal_sign_2_dfa_50_2_logi_logtausplit	scaling	4227	906	0.558227	0.000419841	0.558227
SC_FluctAnal_sign_2_dfa_50_2_logi.prop_r1	SC_FluctAnal_sign_2_dfa_50_2_logi_prop_r1	scaling	4228	906	0.558147	0.000419841	0.558147
NL_TSTL_ReturnTime_5_1_40_n1_1_8.statrtys	NL_TSTL_ReturnTime_5_1_40_n1_1_8_statrtys	nonlinear,tstool	5770	947	-0.55812	0.000419841	0.55812
NL_TSTL_FractalDimensions_2_100_02_1_5_10_32_ac_5.maxq	NL_TSTL_FractalDimensions_2_100_02_1_5_10_32_ac_5_maxq	nonlinear,tstool,dimension,correlation,stochastic	5476	935	-0.558001	0.000419841	0.558001
MF_FitSubsegments_arsbc_rand_25_01.sbcs_range	MF_FitSubsegments_arsbc_rand_25_01_sbcs_range	model,prediction,arfit	7116	1016	-0.557226	0.000419841	0.557226
SC_FluctAnal_2_iqr_50_logi.prop_r1	SC_FluctAnal_2_iqr_50_logi_prop_r1	scaling	3988	896	0.55651	0.000419841	0.55651
PP_Compare_spline64.olbt_m2	PP_Compare_spline64_olbt_m2	preprocessing,raw	6093	967	-0.556494	0.000419841	0.556494
NL_BoxCorrDim_50_ac_5.minr15	NL_BoxCorrDim_50_ac_5_minr15	nonlinear,correlation,tstool,dimension	5248	926	0.556399	0.000419841	0.556399
ST_LocalExtrema_l100.minmaxonminabsmin	ST_LocalExtrema_l100_minmaxonminabsmin	distribution,stationarity	3336	867	-0.556367	0.000419841	0.556367
SC_FluctAnal_2_iqr_50_logi.logtausplit	SC_FluctAnal_2_iqr_50_logi_logtausplit	scaling	3987	896	0.556148	0.000419841	0.556148
DN_OutlierInclude_n_001.mfexpa	DN_OutlierInclude_n_001_mfexpa	distribution,outliers	3280	865	-0.555913	0.000419841	0.555913
ST_LocalExtrema_n25.medianext	ST_LocalExtrema_n25_medianext	distribution,stationarity	3364	868	-0.555795	0.000419841	0.555795
WL_dwtcoeff_sym2_5.maxd_l3	WL_dwtcoeff_sym2_5_maxd_l3	wavelet,dwt	6747	1001	-0.555547	0.000419841	0.555547
NL_BoxCorrDim_50_ac_5.mind4	NL_BoxCorrDim_50_ac_5_mind4	nonlinear,correlation,tstool,dimension	5191	926	0.555284	0.000419841	0.555284
NL_TSTL_dimensions_50_ac_fnnmar.scr_co_m3_meanabsres	NL_TSTL_dimensions_50_ac_fnnmar_scr_co_m3_meanabsres	nonlinear,tstool,scaling,dimension	5434	932	-0.555144	0.000419841	0.555144
NL_TSTL_acp_mi_1__10.macpf_4	NL_TSTL_acp_mi_1__10_macpf_4	nonlinear,correlation	5103	924	-0.554427	0.000419841	0.554427
PP_Compare_resample_1_2.gauss1_kd_resAC1	PP_Compare_resample_1_2_gauss1_kd_resAC1	preprocessing,raw	6393	977	-0.553951	0.000419841	0.553951
CO_AddNoise_ac_gaussian.fitlina	CO_AddNoise_ac_gaussian_fitlina	correlation,AMI,entropy	1291	728	0.553362	0.000419841	0.553362
WL_cwt_sym2_32.max_ssc	WL_cwt_sym2_32_max_ssc	wavelet,cwt	6626	990	-0.55302	0.000419841	0.55302
PP_Compare_spline44.kscn_adiff	PP_Compare_spline44_kscn_adiff	preprocessing,raw	6055	966	-0.552906	0.000419841	0.552906
DN_CompareKSFit_uni.olapint	DN_CompareKSFit_uni_olapint	distribution,ksdensity,raw,locdep	3186	856	0.552819	0.000419841	0.552819
NL_BoxCorrDim_50_ac_5.meanr17	NL_BoxCorrDim_50_ac_5_meanr17	nonlinear,correlation,tstool,dimension	5254	926	-0.552258	0.000419841	0.552258
SD_TSTL_surrogates_1_100_1_tc3.iqrsfrommedian	SD_TSTL_surrogates_1_100_1_tc3_iqrsfrommedian	nonlinear,tstool,correlation,surrogate	5797	949	-0.552047	0.000419841	0.552047
NL_TSTL_dimensions_50_ac_fnnmar.bc_lfitm2	NL_TSTL_dimensions_50_ac_fnnmar_bc_lfitm2	nonlinear,tstool,scaling,dimension	5342	932	0.551899	0.000419841	0.551899
CO_AddNoise_ac_std1_10.pcrossmean	CO_AddNoise_ac_std1_10_pcrossmean	correlation,AMI,entropy	1257	726	0.551378	0.000419841	0.551378
ST_LocalExtrema_n25.medianrat	ST_LocalExtrema_n25_medianrat	distribution,stationarity	3355	868	-0.550887	0.000419841	0.550887
MF_GP_hyperparameters_covSEiso_covNoise_1_50_random_i.std_mu_data	MF_GP_hyperparameters_covSEiso_covNoise_1_50_random_i_std_mu_data	model,GaussianProcess	6516	984	-0.550696	0.000419841	0.550696
PP_Compare_spline64.gauss1_kd_resruns	PP_Compare_spline64_gauss1_kd_resruns	preprocessing,raw	6085	967	0.550538	0.000419841	0.550538
ST_LocalExtrema_n50.meanrat	ST_LocalExtrema_n50_meanrat	distribution,stationarity	3376	869	-0.550356	0.000419841	0.550356
HT_DistributionTest_ks_ev	HT_DistributionTest_ks_ev	hypothesistest,distribution,ks,raw	1009	629	0.550323	0.000419841	0.550323
SB_TransitionMatrix_5ac.sumdiagcov	SB_TransitionMatrix_5ac_sumdiagcov	symbolic,transitionmat	1439	738	0.549748	0.000419841	0.549748
MF_GP_hyperparameters_covSEiso_covPeriodic_covNoise_1_200_resample.logh1	MF_GP_hyperparameters_covSEiso_covPeriodic_covNoise_1_200_resample_logh1	model,GaussianProcess	6470	981	0.549443	0.000419841	0.549443
PP_Compare_poly1.swms10_1	PP_Compare_poly1_swms10_1	preprocessing,raw,stationarity	5888	961	-0.54939	0.000419841	0.54939
PH_Walker_runningvar_15_50.w_mean	PH_Walker_runningvar_15_50_w_mean	trend	2678	819	-0.549194	0.000419841	0.549194
PH_Walker_runningvar_15_50.w_tau	PH_Walker_runningvar_15_50_w_tau	trend	2683	819	0.54799	0.000419841	0.54799
DN_OutlierInclude_abs_001.stdrflb	DN_OutlierInclude_abs_001_stdrflb	distribution,outliers	3246	863	-0.547917	0.000419841	0.547917
DN_Quantile_98	quantile_98	distribution	84	81	-0.547776	0.000419841	0.547776
ST_LocalExtrema_l50.medianrat	ST_LocalExtrema_l50_medianrat	distribution,stationarity	3311	866	-0.547529	0.000419841	0.547529
SB_TransitionMatrix_5ac.maxeigcov	SB_TransitionMatrix_5ac_maxeigcov	symbolic,transitionmat	1444	738	0.547341	0.000419841	0.547341
SB_TransitionMatrix_5ac.stdeigcov	SB_TransitionMatrix_5ac_stdeigcov	symbolic,transitionmat	1446	738	0.547293	0.000419841	0.547293
FC_LocalSimple_mean1.tauresrat	FC_LocalSimple_mean1_tauresrat	forecasting	2997	833	-0.547049	0.000419841	0.547049
SB_TransitionpAlphabet_20_ac.trcovfexp_rmse	SB_TransitionpAlphabet_20_ac_trcovfexp_rmse	symbolic,transitionmat	1500	740	0.546825	0.000419841	0.546825
ST_LocalExtrema_n25.meanext	ST_LocalExtrema_n25_meanext	distribution,stationarity	3361	868	-0.546057	0.000419841	0.546057
DN_OutlierInclude_p_001.stdrfexprmse	DN_OutlierInclude_p_001_stdrfexprmse	distribution,outliers	3275	864	-0.545411	0.000419841	0.545411
ST_LocalExtrema_l50.medianext	ST_LocalExtrema_l50_medianext	distribution,stationarity	3320	866	-0.545164	0.000419841	0.545164
MF_FitSubsegments_arsbc_uniform_25_01.sbcs_range	MF_FitSubsegments_arsbc_uniform_25_01_sbcs_range	model,prediction,arfit	7105	1015	-0.543748	0.000419841	0.543748
ST_LocalExtrema_n100.meanext	ST_LocalExtrema_n100_meanext	distribution,stationarity	3405	870	-0.543437	0.000419841	0.543437
ST_LocalExtrema_n25.meanrat	ST_LocalExtrema_n25_meanrat	distribution,stationarity	3354	868	-0.543154	0.000419841	0.543154
SY_SpreadRandomLocal_ac2_100.stdtaul	SY_SpreadRandomLocal_ac2_100_stdtaul	stationarity	2094	476	0.543092	0.000419841	0.543092
WL_coeffs_db3_3.wb75m	WL_coeffs_db3_3_wb75m	wavelet	6681	995	0.542847	0.000419841	0.542847
WL_coeffs_db3_max.wb25m	WL_coeffs_db3_max_wb25m	wavelet	6713	998	0.542692	0.000419841	0.542692
DN_RemovePoints_max_08.fzcacrat	DN_RemovePoints_max_08_fzcacrat	correlation,outliers	1771	761	-0.542083	0.000419841	0.542083
EN_DistributionEntropy_ks_1_0	EN_DistributionEntropy_ks_1_0	entropy	877	518	-0.541798	0.000419841	0.541798
SY_SlidingWindow_ent_s2_1	SY_SlidingWindow_ent_s2_1	stationarity	604	331	-0.541673	0.000419841	0.541673
SY_LocalGlobal_p05.std	SY_LocalGlobal_std_p05	stationarity	778	501	0.541295	0.000419841	0.541295
AC_20	AC_20	correlation	112	111	0.540981	0.000419841	0.540981
ST_LocalExtrema_l50.meanext	ST_LocalExtrema_l50_meanext	distribution,stationarity	3317	866	-0.540957	0.000419841	0.540957
SY_LocalGlobal_unicg100.ac1	SY_LocalGlobal_AC1_unicg100	stationarity	854	507	-0.540534	0.000419841	0.540534
SD_TSTL_surrogates_mi_100_2_trev.kspminfromext	SD_TSTL_surrogates_mi_100_2_trev_kspminfromext	nonlinear,tstool,correlation,surrogate	5863	958	0.540446	0.000419841	0.540446
SB_MotifThree_quantile.cbcc	SB_MotifThree_quantile_cbcc	symbolic,motifs	3704	881	0.540434	0.000419841	0.540434
NL_TISEAN_c1_1_1_7_002_05.bestscrd	NL_TISEAN_c1_1_1_7_002_05_bestscrd	nonlinear,tisean,dimension,entropy	5066	922	-0.539973	0.000419841	0.539973
FC_LocalSimple_lfit3.tauresrat	FC_LocalSimple_lfit3_tauresrat	forecasting	3107	843	-0.53946	0.000419841	0.53946
PP_Compare_spline24.statav4	PP_Compare_spline24_statav4	preprocessing,raw,stationarity	6005	965	0.539437	0.000419841	0.539437
ST_LocalExtrema_l50.meanrat	ST_LocalExtrema_l50_meanrat	distribution,stationarity	3310	866	-0.539393	0.000419841	0.539393
SB_TransitionMatrix_4ac.maxeigcov	SB_TransitionMatrix_4ac_maxeigcov	symbolic,transitionmat	1427	737	0.539027	0.000419841	0.539027
FC_LocalSimple_lfit2.tauresrat	FC_LocalSimple_lfit2_tauresrat	forecasting	3097	842	-0.538728	0.000419841	0.538728
FC_LoopLocalSimple_mean.sws_fexp_adjr2	FC_LoopLocalSimple_mean_sws_fexp_adjr2	forecasting	3048	838	-0.538667	0.000419841	0.538667
DN_CompareKSFit_ev.adiff	DN_CompareKSFit_ev_adiff	distribution,ksdensity,raw,locdep	3178	855	-0.538551	0.000419841	0.538551
MF_CompareTestSets_y_ar_4_rand_25_01_1.ac1s_mean	MF_CompareTestSets_y_ar_4_rand_25_01_1_ac1s_mean	model,prediction,stationarity	7166	1020	-0.538412	0.000419841	0.538412
PH_ForcePotential_sine_3_05_1.tau	PH_ForcePotential_sine_3_05_1_tau	dynamicalSystem	1651	749	-0.538232	0.000419841	0.538232
SB_TransitionMatrix_4ac.stdeigcov	SB_TransitionMatrix_4ac_stdeigcov	symbolic,transitionmat	1429	737	0.538214	0.000419841	0.538214
SB_MotifThree_quantile.ccbc	SB_MotifThree_quantile_ccbc	symbolic,motifs	3710	881	0.537991	0.000419841	0.537991
WL_cwt_sym2_32.stat_5_s_s	WL_cwt_sym2_32_stat_5_s_s	wavelet,cwt	6636	990	-0.53784	0.000419841	0.53784
SB_TransitionMatrix_4ac.sumdiagcov	SB_TransitionMatrix_4ac_sumdiagcov	symbolic,transitionmat	1422	737	0.53754	0.000419841	0.53754
WL_cwt_db3_32.stat_5_s_s	WL_cwt_db3_32_stat_5_s_s	wavelet,cwt	6610	989	-0.537143	0.000419841	0.537143
FC_LoopLocalSimple_mean.sws_fexp_a	FC_LoopLocalSimple_mean_sws_fexp_a	forecasting	3045	838	0.537006	0.000419841	0.537006
NL_TSTL_dimensions_50_ac_fnnmar.scr_co_m2_meanabsres	NL_TSTL_dimensions_50_ac_fnnmar_scr_co_m2_meanabsres	nonlinear,tstool,scaling,dimension	5425	932	0.536706	0.000419841	0.536706
MF_CompareTestSets_y_ar_4_rand_25_01_1.rmserr_iqr	MF_CompareTestSets_y_ar_4_rand_25_01_1_rmserr_iqr	model,prediction,stationarity	7161	1020	-0.536173	0.000419841	0.536173
SY_SlidingWindow_sampen_s5_1	SY_SlidingWindow_sampen_s5_1	stationarity	629	356	-0.535939	0.000419841	0.535939
DN_RemovePoints_min_05.std	DN_RemovePoints_min_05_std	correlation,outliers	1748	758	-0.535683	0.000419841	0.535683
EN_mse_1-10_2_015.sampen_s4	EN_mse_1-10_2_015_sampen_s4	entropy,sampen,mse	2749	827	0.535477	0.000419841	0.535477
DN_Quantile_60	quantile_60	distribution	73	70	0.534934	0.000419841	0.534934
SY_LocalGlobal_unicg20.median	SY_LocalGlobal_median_unicg20	stationarity	796	505	0.534766	0.000419841	0.534766
DN_RemovePoints_max_01.std	DN_RemovePoints_max_01_std	correlation,outliers	1768	760	0.534754	0.000419841	0.534754
WL_coeffs_db3_3.max_coeff	WL_coeffs_db3_3_max_coeff	wavelet	6677	995	-0.534551	0.000419841	0.534551
NL_TSTL_dimensions_50_ac_fnnmar.scr_co_mopt_meansqres	NL_TSTL_dimensions_50_ac_fnnmar_scr_co_mopt_meansqres	nonlinear,tstool,scaling,dimension	5444	932	-0.534449	0.000419841	0.534449
SY_SpreadRandomLocal_50_100.meanskew	SY_SpreadRandomLocal_50_100_meanskew	stationarity	2113	478	-0.534179	0.000419841	0.534179
FC_LocalSimple_lfit5.tauresrat	FC_LocalSimple_lfit5_tauresrat	forecasting	3127	845	-0.533716	0.000419841	0.533716
CO_trev_ac.num	CO_trev_ac_num	correlation,nonlinear	1136	711	0.531831	0.000419841	0.531831
SY_LocalGlobal_unicg100.kurtosis	SY_LocalGlobal_kurtosis_unicg100	stationarity	840	507	-0.530961	0.000419841	0.530961
DN_CompareKSFit_ev.peaksepy	DN_CompareKSFit_ev_psy	distribution,ksdensity,raw,locdep	3179	855	0.530857	0.000419841	0.530857
DN_RemovePoints_min_08.ac2diff	DN_RemovePoints_min_08_ac2diff	correlation,outliers	1753	759	0.530762	0.000419841	0.530762
DN_OutlierInclude_p_001.stdrflrmse	DN_OutlierInclude_p_001_stdrflrmse	distribution,outliers	3279	864	0.530382	0.000419841	0.530382
CO_trev_ac.raw	CO_trev_ac_raw	correlation,nonlinear	1134	711	0.53036	0.000419841	0.53036
DN_CompareKSFit_wbl.peaksepy	DN_CompareKSFit_wbl_psy	distribution,ksdensity,raw,posOnly	3214	862	0.529836	0.000419841	0.529836
PH_ForcePotential_sine_3_05_1.finaldev	PH_ForcePotential_sine_3_05_1_finaldev	dynamicalSystem	1652	749	-0.529709	0.000419841	0.529709
SY_SlidingWindow_mom4_s2_1	SY_SlidingWindow_mom4_s2_1	stationarity	672	399	-0.529635	0.000419841	0.529635
NL_BoxCorrDim_50_ac_5.medianr2	NL_BoxCorrDim_50_ac_5_medianr2	nonlinear,correlation,tstool,dimension	5195	926	-0.529517	0.000419841	0.529517
PP_Compare_medianf3.gauss1_kd_resAC1	PP_Compare_medianf3_gauss1_kd_resAC1	preprocessing,raw	6176	970	0.529349	0.000419841	0.529349
DN_OutlierInclude_abs_001.stdrfla	DN_OutlierInclude_abs_001_stdrfla	distribution,outliers	3245	863	0.529092	0.000419841	0.529092
PD_PeriodicityWang.th3	PD_PeriodicityWang_th0.1	periodicity,spline	1586	744	0.528868	0.000419841	0.528868
CO_AddNoise_ac_gaussian.fitexprmse	CO_AddNoise_ac_gaussian_fitexprmse	correlation,AMI,entropy	1290	728	-0.528845	0.000737727	0.528845
CP_ML_StepDetect_l1pwc_02.diffn12	CP_ML_StepDetect_l1pwc_02_diffn12	stepdetection	7798	1054	-0.528356	0.000419841	0.528356
PP_Compare_spline24.swms10_1	PP_Compare_spline24_swms10_1	preprocessing,raw,stationarity	6012	965	0.528251	0.000419841	0.528251
NL_BoxCorrDim_50_ac_5.minr3	NL_BoxCorrDim_50_ac_5_minr3	nonlinear,correlation,tstool,dimension	5200	926	-0.528158	0.000419841	0.528158
PP_Compare_diff1.olbt_s2	PP_Compare_diff1_olbt_s2	preprocessing,raw	6126	968	-0.527799	0.000419841	0.527799
PP_Compare_medianf10.kscn_peaksepy	PP_Compare_medianf10_kscn_peaksepy	preprocessing,raw	6242	972	-0.526559	0.000419841	0.526559
EN_Randomize_permute.swss5_1hp	EN_Randomize_permute_swss5_1hp	entropy,slow,stationarity	2988	832	-0.526173	0.000419841	0.526173
CO_AddNoise_ac_quantiles_10.ac2	CO_AddNoise_ac_quantiles_10_ac2	correlation,AMI,entropy	1166	722	-0.525715	0.000419841	0.525715
CP_ML_StepDetect_l1pwc_02.ratn12	CP_ML_StepDetect_l1pwc_02_ratn12	stepdetection	7797	1054	0.525655	0.000419841	0.525655
MF_GP_hyperparameters_covSEiso_covNoise_1_50_random_i.maxS	MF_GP_hyperparameters_covSEiso_covNoise_1_50_random_i_maxS	model,GaussianProcess	6518	984	-0.525371	0.000419841	0.525371
SY_SpreadRandomLocal_50_100.meanmean	SY_SpreadRandomLocal_50_100_meanmean	stationarity	2111	478	-0.525365	0.000419841	0.525365
MF_GP_FitAcross_covSEiso_covNoise_20.logh2	MF_GP_FitAcross_covSEiso_covNoise_20_logh2	model,GaussianProcess	6582	988	-0.524262	0.000419841	0.524262
CO_tc3_ac.raw	CO_tc3_ac_raw	correlation,nonlinear	1109	706	-0.524023	0.000419841	0.524023
CO_AddNoise_ac_quantiles_10.fitexpr2	CO_AddNoise_ac_quantiles_10_fitexpr2	correlation,AMI,entropy	1176	722	-0.524012	0.000419841	0.524012
NW_VisibilityGraph_norm.dexpk_resruns	NW_VisibilityGraph_norm_dexpk_resruns	network,visibilityGraph	2052	773	0.523859	0.000419841	0.523859
SY_SlidingWindow_ent_ent2_1	SY_SlidingWindow_ent_ent2_1	stationarity	617	344	-0.523048	0.000419841	0.523048
SD_TSTL_surrogates_1_100_1_tc3.kspminfromext	SD_TSTL_surrogates_1_100_1_tc3_kspminfromext	nonlinear,tstool,correlation,surrogate	5800	949	0.522969	0.000419841	0.522969
SY_SlidingWindow_lil_sampen5_10	SY_SlidingWindow_lil_sampen5_10	stationarity	705	432	0.522098	0.000419841	0.522098
SD_TSTL_surrogates_1_100_1_tc3.ksphereonmax	SD_TSTL_surrogates_1_100_1_tc3_ksphereonmax	nonlinear,tstool,correlation,surrogate	5801	949	0.521961	0.000419841	0.521961
EX_MovingThreshold_1_002.stdq	EX_MovingThreshold_1_002_stdq	outliers	3458	874	-0.521826	0.000419841	0.521826
PP_Compare_spline24.swms2_2	PP_Compare_spline24_swms2_2	preprocessing,raw,stationarity	6009	965	0.521791	0.000419841	0.521791
CO_AddNoise_ac_quantiles_10.ac1	CO_AddNoise_ac_quantiles_10_ac1	correlation,AMI,entropy	1165	722	-0.521349	0.000419841	0.521349
PP_Compare_diff2.olbt_s2	PP_Compare_diff2_olbt_s2	preprocessing,raw	6157	969	-0.521287	0.000419841	0.521287
CO_AddNoise_ac_even_10.ac1	CO_AddNoise_ac_even_10_ac1	correlation,AMI,entropy	1203	724	-0.520971	0.000419841	0.520971
SY_SpreadRandomLocal_ac5_100.stdtaul	SY_SpreadRandomLocal_ac5_100_stdtaul	stationarity	2110	477	0.52081	0.000419841	0.52081
HT_DistributionTest_ks_wbl	HT_DistributionTest_ks_wbl	hypothesistest,distribution,ks,raw,locdep,posOnly	1016	636	0.520566	0.000419841	0.520566
CO_AddNoise_ac_quantiles_10.pcrossmean	CO_AddNoise_ac_quantiles_10_pcrossmean	correlation,AMI,entropy	1181	722	0.520533	0.000419841	0.520533
NL_TSTL_dimensions_50_ac_fnnmar.bc_maxscalingexp	NL_TSTL_dimensions_50_ac_fnnmar_bc_maxscalingexp	nonlinear,tstool,scaling,dimension	5448	932	0.520501	0.000419841	0.520501
SC_FluctAnal_2_dfa_50_1_logi.linfitint	SC_FluctAnal_2_dfa_50_1_logi_linfitint	scaling	4077	900	-0.520422	0.000419841	0.520422
PH_Walker_prop_11.w_max	PH_Walker_prop_11_w_max	trend	2585	814	-0.520413	0.000419841	0.520413
FC_LocalSimple_meantau.meanerr	FC_LocalSimple_meantau_meanerr	forecasting	3028	837	0.519975	0.000419841	0.519975
CO_AddNoise_ac_even_10.ac2	CO_AddNoise_ac_even_10_ac2	correlation,AMI,entropy	1204	724	-0.51989	0.000419841	0.51989
EN_DistributionEntropy_ks_05_0	EN_DistributionEntropy_ks_05_0	entropy	876	517	-0.51988	0.000419841	0.51988
PP_Compare_sin1.swms10_1	PP_Compare_sin1_swms10_1	preprocessing,raw,stationarity	5950	963	-0.519599	0.000419841	0.519599
PH_Walker_prop_11.w_tau	PH_Walker_prop_11_w_tau	trend	2583	814	0.519428	0.000419841	0.519428
MF_CompareTestSets_y_ss_2_uniform_25_01_1.ac1s_mean	MF_CompareTestSets_y_ss_2_uniform_25_01_1_ac1s_mean	model,prediction,stationarity	7226	1023	-0.518543	0.000419841	0.518543
PP_Compare_spline44.swss2_2	PP_Compare_spline44_swss2_2	preprocessing,raw,stationarity	6045	966	-0.518448	0.000419841	0.518448
NL_BoxCorrDim_50_ac_5.minr14	NL_BoxCorrDim_50_ac_5_minr14	nonlinear,correlation,tstool,dimension	5244	926	0.518312	0.000419841	0.518312
SD_SurrogateTest_RP_99.tc3_mediqr	SD_SurrogateTest_RP_99_tc3_mediqr	surrogate,nonlinearity	7856	1062	-0.518256	0.000419841	0.518256
SY_LocalGlobal_l100.median	SY_LocalGlobal_median_l100	stationarity	789	498	0.517418	0.000419841	0.517418
MF_armax_2_2_05_1.lastimprovement	MF_armax_2_2_05_1_lastimprovement	model	7469	1032	-0.516423	0.000419841	0.516423
NL_TSTL_ReturnTime_5_1_40_n1_1_8.hhist	NL_TSTL_ReturnTime_5_1_40_n1_1_8_hhist	nonlinear,tstool	5772	947	0.516354	0.000419841	0.516354
DN_SimpleFit_gauss2_ks.rmse	DN_SimpleFit_gauss2_rmse_ks	distribution,gof,gauss2	3149	849	-0.516305	0.000419841	0.516305
WL_coeffs_db3_max.wb10m	WL_coeffs_db3_max_wb10m	wavelet	6714	998	0.516206	0.000419841	0.516206
DN_RemovePoints_absclose_08.fzcacrat	DN_RemovePoints_absclose_08_fzcacrat	correlation,outliers	1698	754	-0.515781	0.000419841	0.515781
DN_OutlierInclude_p_001.nfexprmse	DN_OutlierInclude_p_001_nfexprmse	distribution,outliers	3258	864	0.515404	0.000419841	0.515404
SB_TransitionMatrix_3ac.T6	SB_TransitionMatrix_3ac_T6	symbolic,transitionmat	1398	736	0.515188	0.000419841	0.515188
SD_TSTL_surrogates_1_100_1_tc3.normpatponmax	SD_TSTL_surrogates_1_100_1_tc3_normpatponmax	nonlinear,tstool,correlation,surrogate	5796	949	0.514323	0.000419841	0.514323
PP_Compare_spline64.kscn_relent	PP_Compare_spline64_kscn_relent	preprocessing,raw	6090	967	-0.514024	0.000419841	0.514024
NL_BoxCorrDim_50_ac_5.meanr2	NL_BoxCorrDim_50_ac_5_meanr2	nonlinear,correlation,tstool,dimension	5194	926	-0.513935	0.000419841	0.513935
SB_MotifThree_diffquant.acaa	SB_MotifThree_diffquant_acaa	symbolic,motifs	3771	882	0.51361	0.000419841	0.51361
MF_hmm_08_2.meanMu	MF_hmm_08_2_meanMu	hmm,model	7734	1049	-0.513567	0.000419841	0.513567
TSTL_localdensity_5_40_ac_2.stdden	TSTL_localdensity_5_40_ac_2_stdden	nonlinear,tstool	5518	939	-0.513486	0.000419841	0.513486
SY_SpreadRandomLocal_200_100.meankurt	SY_SpreadRandomLocal_200_100_meankurt	stationarity	2146	480	-0.512946	0.000419841	0.512946
DN_OutlierInclude_abs_001.mrstd	DN_OutlierInclude_abs_001_mrstd	distribution,outliers	3237	863	-0.512473	0.000419841	0.512473
SB_TransitionMatrix_3ac.stdeigcov	SB_TransitionMatrix_3ac_stdeigcov	symbolic,transitionmat	1413	736	0.512235	0.000419841	0.512235
SB_TransitionMatrix_3ac.maxeigcov	SB_TransitionMatrix_3ac_maxeigcov	symbolic,transitionmat	1411	736	0.512164	0.000419841	0.512164
NL_TSTL_dimensions_50_ac_fnnmar.scr_co_mopt_meanabsres	NL_TSTL_dimensions_50_ac_fnnmar_scr_co_mopt_meanabsres	nonlinear,tstool,scaling,dimension	5443	932	-0.511892	0.000419841	0.511892
SB_TransitionMatrix_3ac.sumdiagcov	SB_TransitionMatrix_3ac_sumdiagcov	symbolic,transitionmat	1406	736	0.511793	0.000419841	0.511793
PP_Compare_resample_2_1.swss2_1	PP_Compare_resample_2_1_swss2_1	preprocessing,raw,stationarity	6416	978	0.51164	0.000419841	0.51164
PP_Compare_spline24.statav10	PP_Compare_spline24_statav10	preprocessing,raw,stationarity	6008	965	0.510686	0.000419841	0.510686
FC_LocalSimple_mean2.tauresrat	FC_LocalSimple_mean2_tauresrat	forecasting	3007	834	-0.51002	0.000419841	0.51002
SB_TransitionpAlphabet_20_ac.stdeigfexp_a	SB_TransitionpAlphabet_20_ac_stdeigfexp_a	symbolic,transitionmat	1501	740	-0.50946	0.000419841	0.50946
MF_CompareTestSets_y_ar_best_uniform_25_01_1.ac1s_mean	MF_CompareTestSets_y_ar_best_uniform_25_01_1_ac1s_mean	model,prediction,arfit,stationarity	7186	1021	-0.509121	0.000419841	0.509121
DN_CompareKSFit_wbl.adiff	DN_CompareKSFit_wbl_adiff	distribution,ksdensity,raw,locdep,posOnly	3213	862	-0.508985	0.000419841	0.508985
DN_OutlierInclude_n_001.stdrflrmse	DN_OutlierInclude_n_001_stdrflrmse	distribution,outliers	3309	865	0.508932	0.000419841	0.508932
PP_Compare_rav10.kscn_peaksepy	PP_Compare_rav10_kscn_peaksepy	preprocessing,raw	6366	976	-0.508107	0.000419841	0.508107
DN_OutlierInclude_n_001.xcmerr1	DN_OutlierInclude_n_001_xcmerr1	distribution,outliers	3299	865	0.507996	0.000419841	0.507996
PP_Compare_spline44.swms2_2	PP_Compare_spline44_swms2_2	preprocessing,raw,stationarity	6040	966	0.507664	0.000419841	0.507664
DN_RemovePoints_min_01.ac2diff	DN_RemovePoints_min_01_ac2diff	correlation,outliers	1733	757	0.507547	0.000419841	0.507547
MF_CompareTestSets_y_ar_4_rand_25_01_1.rmserr_std	MF_CompareTestSets_y_ar_4_rand_25_01_1_rmserr_std	model,prediction,stationarity	7160	1020	-0.507385	0.000419841	0.507385
WL_cwt_db3_32.max_ssc	WL_cwt_db3_32_max_ssc	wavelet,cwt	6600	989	-0.507282	0.000419841	0.507282
CO_Embed2_Basic_1.parabdown05_1	CO_Embed2_Basic_1_parabdown05_1	correlation	1539	742	0.507203	0.000419841	0.507203
SY_SlidingWindow_sampen_ent5_1	SY_SlidingWindow_sampen_ent5_1	stationarity	643	370	-0.507152	0.000419841	0.507152
DN_RemovePoints_min_01.kurtosisrat	DN_RemovePoints_min_01_kurtosisrat	correlation,outliers,distribution	1740	757	-0.506964	0.000419841	0.506964
PP_Compare_medianf3.gauss1_kd_resAC2	PP_Compare_medianf3_gauss1_kd_resAC2	preprocessing,raw	6177	970	0.506822	0.000419841	0.506822
SD_TSTL_surrogates_1_100_2_tc3.ksiqrsfrommode	SD_TSTL_surrogates_1_100_2_tc3_ksiqrsfrommode	nonlinear,tstool,correlation,surrogate	5816	951	-0.506796	0.000419841	0.506796
FC_LocalSimple_median3.sws	FC_LocalSimple_median3_sws	forecasting	3062	839	-0.50655	0.000419841	0.50655
SB_TransitionpAlphabet_20_ac.symd_a	SB_TransitionpAlphabet_20_ac_symd_a	symbolic,transitionmat	1494	740	0.506075	0.000419841	0.506075
EN_DistributionEntropy_ks_01_0	EN_DistributionEntropy_ks_01_0	entropy	875	516	-0.505903	0.000419841	0.505903
PP_Compare_rav2.gauss1_kd_resAC2	PP_Compare_rav2_gauss1_kd_resAC2	preprocessing,raw	6270	973	0.505807	0.000419841	0.505807
PP_Iterate_diff.swss5_2_trend	PP_Iterate_diff_swss5_2_trend	preprocessing,raw,stationarity	6444	979	0.50579	0.000419841	0.50579
SB_TransitionMatrix_5ac.symdiff	SB_TransitionMatrix_5ac_symdiff	symbolic,transitionmat	1437	738	0.505336	0.000419841	0.505336
NL_TSTL_acp_mi_1__10.sacpf_2	NL_TSTL_acp_mi_1__10_sacpf_2	nonlinear,correlation	5096	924	-0.504323	0.000419841	0.504323
MF_ExpSmoothing_05_best.propbth	MF_ExpSmoothing_05_best_propbth	model	7526	1034	0.504294	0.000419841	0.504294
SY_SlidingWindow_ent_sampen5_10	SY_SlidingWindow_ent_sampen5_10	stationarity	614	341	0.50414	0.000419841	0.50414
SP_Summaries_pgram_hamm.width_weighted_prom	SP_Summaries_pgram_hamm_width_weighted_prom	spectral	4270	908	-0.504121	0.000419841	0.504121
CP_ML_StepDetect_l1pwc_02.meanstepint	CP_ML_StepDetect_l1pwc_02_meanstepint	stepdetection	7800	1054	0.504097	0.000419841	0.504097
SB_MotifThree_quantile.ccb	SB_MotifThree_quantile_ccb	symbolic,motifs	3630	881	0.503978	0.000419841	0.503978
ST_LocalExtrema_l100.meanrat	ST_LocalExtrema_l100_meanrat	distribution,stationarity	3332	867	-0.503812	0.000419841	0.503812
ST_LocalExtrema_l100.medianrat	ST_LocalExtrema_l100_medianrat	distribution,stationarity	3333	867	-0.503694	0.000419841	0.503694
DN_Moments_11	DN_Moments_11	distribution,moment,shape	31	30	-0.503643	0.000419841	0.503643
CP_ML_StepDetect_l1pwc_02.nsegments	CP_ML_StepDetect_l1pwc_02_nsegments	stepdetection	7794	1054	-0.502927	0.000419841	0.502927
SY_SlidingWindow_mom4_ent2_1	SY_SlidingWindow_mom4_ent2_1	stationarity	686	413	-0.502881	0.000419841	0.502881
DN_RemovePoints_absfar_01.fzcacrat	DN_RemovePoints_absfar_01_fzcacrat	correlation,outliers	1709	755	-0.502716	0.000419841	0.502716
PH_Walker_prop_05.res_swss5_1	PH_Walker_prop_05_swss5_1	trend,stationarity	2556	812	-0.50258	0.000419841	0.50258
SY_SpreadRandomLocal_ac2_100.stdstd	SY_SpreadRandomLocal_ac2_100_stdstd	stationarity	2088	476	-0.502477	0.000419841	0.502477
NL_TSTL_dimensions_50_ac_fnnmar.co_lfitbmax	NL_TSTL_dimensions_50_ac_fnnmar_co_lfitbmax	nonlinear,tstool,scaling,dimension	5370	932	-0.501773	0.000419841	0.501773
CO_tc3_mi.raw	CO_tc3_mi_raw	correlation,nonlinear	1114	707	-0.501582	0.000419841	0.501582
EN_DistributionEntropy_ks_001_0	EN_DistributionEntropy_ks_001_0	entropy	874	515	-0.501419	0.000419841	0.501419
PP_Compare_sin1.swms5_2	PP_Compare_sin1_swms5_2	preprocessing,raw,stationarity	5949	963	-0.500662	0.000419841	0.500662
FC_LocalSimple_mean3.tauresrat	FC_LocalSimple_mean3_tauresrat	forecasting	3017	835	-0.500322	0.000419841	0.500322
PP_Compare_sin2.swss2_1	PP_Compare_sin2_swss2_1	preprocessing,raw,stationarity	5982	964	0.49958	0.000419841	0.49958
EX_MovingThreshold_01_002.stdq	EX_MovingThreshold_01_002_stdq	outliers	3436	872	-0.499258	0.000419841	0.499258
NL_TSTL_dimensions_50_ac_fnnmar.bc_mindiff	NL_TSTL_dimensions_50_ac_fnnmar_bc_mindiff	nonlinear,tstool,scaling,dimension	5339	932	0.499019	0.000419841	0.499019
MF_ExpSmoothing_05_best.ac3	MF_ExpSmoothing_05_best_ac3	model	7520	1034	-0.497694	0.000419841	0.497694
DN_RemovePoints_absclose_01.fzcacrat	DN_RemovePoints_absclose_01_fzcacrat	correlation,outliers	1676	752	-0.497208	0.000419841	0.497208
ST_LocalExtrema_l100.uord	ST_LocalExtrema_l100_uord	distribution,stationarity	3350	867	-0.496819	0.000419841	0.496819
PP_Compare_rav3.kscn_olapint	PP_Compare_rav3_kscn_olapint	preprocessing,raw	6306	974	0.496096	0.000419841	0.496096
SY_LocalGlobal_p5.kurtosis	SY_LocalGlobal_kurtosis_p5	stationarity	836	503	-0.495982	0.000419841	0.495982
DN_RemovePoints_max_01.mean	DN_RemovePoints_max_01_mean	correlation,outliers	1767	760	0.495973	0.000419841	0.495973
NL_TSTL_dimensions_50_ac_fnnmar.co_lfitmeansqdev1	NL_TSTL_dimensions_50_ac_fnnmar_co_lfitmeansqdev1	nonlinear,tstool,scaling,dimension	5371	932	-0.49528	0.000419841	0.49528
ST_LocalExtrema_l100.meanext	ST_LocalExtrema_l100_meanext	distribution,stationarity	3339	867	-0.495036	0.000419841	0.495036
DN_OutlierInclude_p_001.stdrfla	DN_OutlierInclude_p_001_stdrfla	distribution,outliers	3276	864	0.494939	0.000419841	0.494939
SC_FluctAnal_2_range_50_logi.resac1	SC_FluctAnal_2_range_50_logi_resac1	scaling	3938	894	0.494735	0.000419841	0.494735
DN_OutlierInclude_abs_001.mfexpr2	DN_OutlierInclude_abs_001_mfexpr2	distribution,outliers	3221	863	0.494443	0.000419841	0.494443
SD_SurrogateTest_RP_99.tc3_f	SD_SurrogateTest_RP_99_tc3_f	surrogate,nonlinearity	7855	1062	0.494271	0.000419841	0.494271
DN_OutlierInclude_p_001.stdrfexpr2	DN_OutlierInclude_p_001_stdrfexpr2	distribution,outliers	3274	864	0.493972	0.000419841	0.493972
PP_Compare_spline24.statav6	PP_Compare_spline24_statav6	preprocessing,raw,stationarity	6006	965	0.493622	0.000419841	0.493622
SB_TransitionpAlphabet_20_ac.symd_risept	SB_TransitionpAlphabet_20_ac_symd_risept	symbolic,transitionmat	1495	740	-0.493306	0.000419841	0.493306
SY_LocalGlobal_l50.std	SY_LocalGlobal_std_l50	stationarity	774	497	0.493138	0.000419841	0.493138
PP_Compare_spline44.kscn_relent	PP_Compare_spline44_kscn_relent	preprocessing,raw	6059	966	-0.493127	0.000419841	0.493127
MF_ExpSmoothing_05_best.acsnd0	MF_ExpSmoothing_05_best_acsnd0	model	7525	1034	-0.493077	0.000419841	0.493077
SD_TSTL_surrogates_1_100_2_tc3.iqrsfrommedian	SD_TSTL_surrogates_1_100_2_tc3_iqrsfrommedian	nonlinear,tstool,correlation,surrogate	5811	951	-0.492932	0.000419841	0.492932
DN_Moments_9	DN_Moments_9	distribution,moment,shape	29	28	-0.492862	0.000419841	0.492862
PP_Compare_medianf4.gauss1_kd_resAC2	PP_Compare_medianf4_gauss1_kd_resAC2	preprocessing,raw	6208	971	0.492801	0.000419841	0.492801
SY_LocalGlobal_unicg10.median	SY_LocalGlobal_median_unicg10	stationarity	795	504	0.492453	0.000419841	0.492453
NL_TSTL_ReturnTime_5_1_40_n1_1_8.hhisthist	NL_TSTL_ReturnTime_5_1_40_n1_1_8_hhisthist	nonlinear,tstool	5777	947	-0.49228	0.000419841	0.49228
CP_ML_StepDetect_l1pwc_005.pshort_3	CP_ML_StepDetect_l1pwc_005_pshort_3	stepdetection	7786	1053	-0.491986	0.000419841	0.491986
ST_LocalExtrema_l100.medianext	ST_LocalExtrema_l100_medianext	distribution,stationarity	3342	867	-0.491355	0.000419841	0.491355
SB_MotifThree_quantile.bcc	SB_MotifThree_quantile_bcc	symbolic,motifs	3622	881	0.491151	0.000419841	0.491151
CO_StickAngles_y.q10_n	CO_StickAngles_y_q10_n	correlation	1897	766	-0.490754	0.000419841	0.490754
EN_mse_1-10_2_015.meanSampEn	EN_mse_1-10_2_015_meanSampEn	entropy,sampen,mse	2760	827	0.490695	0.000419841	0.490695
EN_Randomize_dyndist.d1fexpb	EN_Randomize_dyndist_d1fexpb	entropy,slow	2876	831	-0.490495	0.000419841	0.490495
FC_LocalSimple_mean1.meanerr	FC_LocalSimple_mean1_meanerr	forecasting	2989	833	0.490333	0.000419841	0.490333
CO_AddNoise_ac_kraskov1_4.ac2	CO_AddNoise_ac_kraskov1_4_ac2	correlation,AMI,entropy	1317	730	-0.489626	0.000419841	0.489626
NL_TSTL_dimensions_50_ac_fnnmar.bc_minm3	NL_TSTL_dimensions_50_ac_fnnmar_bc_minm3	nonlinear,tstool,scaling,dimension	5337	932	0.489376	0.000737727	0.489376
DN_Quantile_97	quantile_97	distribution	83	80	-0.489251	0.000419841	0.489251
NL_TSTL_acp_mi_1__10.sacpf_6	NL_TSTL_acp_mi_1__10_sacpf_6	nonlinear,correlation	5112	924	-0.48921	0.000419841	0.48921
CO_AddNoise_ac_kraskov1_4.pcrossmean	CO_AddNoise_ac_kraskov1_4_pcrossmean	correlation,AMI,entropy	1332	730	0.489129	0.000419841	0.489129
WL_coeffs_db3_4.wb90m	WL_coeffs_db3_4_wb90m	wavelet	6690	996	0.489039	0.000419841	0.489039
NL_BoxCorrDim_50_ac_5.minr2	NL_BoxCorrDim_50_ac_5_minr2	nonlinear,correlation,tstool,dimension	5196	926	-0.488831	0.000419841	0.488831
AC_21	AC_21	correlation	113	112	0.488683	0.000419841	0.488683
SY_DynWin10.stdtaul	SY_DynWin_stdtaul	stationarity	2078	774	0.488505	0.000419841	0.488505
NL_TSTL_dimensions_50_ac_fnnmar.scr_co_mopt_scaling_exp	NL_TSTL_dimensions_50_ac_fnnmar_scr_co_mopt_scaling_exp	nonlinear,tstool,scaling,dimension	5445	932	-0.487959	0.000419841	0.487959
NL_TSTL_dimensions_50_ac_fnnmar.co_minscalingexp	NL_TSTL_dimensions_50_ac_fnnmar_co_minscalingexp	nonlinear,tstool,scaling,dimension	5451	932	-0.487926	0.000419841	0.487926
NL_TSTL_FractalDimensions_2_100_02_1_5_10_32_ac_5.linfit_rmsqres	NL_TSTL_FractalDimensions_2_100_02_1_5_10_32_ac_5_linfit_rmsqres	nonlinear,tstool,dimension,correlation,stochastic	5481	935	-0.487252	0.000419841	0.487252
SY_SpreadRandomLocal_100_100.meanskew	SY_SpreadRandomLocal_100_100_meanskew	stationarity	2129	479	-0.486377	0.000419841	0.486377
SY_SlidingWindow_ac1_s2_1	SY_SlidingWindow_ac1_s2_1	stationarity	718	445	-0.485815	0.000419841	0.485815
CO_AddNoise_ac_even_10.pcrossmean	CO_AddNoise_ac_even_10_pcrossmean	correlation,AMI,entropy	1219	724	0.485643	0.000419841	0.485643
EN_Randomize_permute.d1fexpa	EN_Randomize_permute_d1fexpa	entropy,slow,lengthdep	2938	832	0.485572	0.000419841	0.485572
SB_TransitionMatrix_4ac.symdiff	SB_TransitionMatrix_4ac_symdiff	symbolic,transitionmat	1420	737	0.485458	0.000419841	0.485458
SC_FluctAnal_2_dfa_50_0_logi.prop_r1	SC_FluctAnal_2_dfa_50_0_logi_prop_r1	scaling	4060	899	0.485216	0.000419841	0.485216
NL_TSTL_dimensions_50_ac_fnnmar.scr_bc_m3_pgone	NL_TSTL_dimensions_50_ac_fnnmar_scr_bc_m3_pgone	nonlinear,tstool,scaling,dimension	5397	932	0.485188	0.000419841	0.485188
NL_BoxCorrDim_50_ac_5.meanr3	NL_BoxCorrDim_50_ac_5_meanr3	nonlinear,correlation,tstool,dimension	5198	926	-0.485125	0.000419841	0.485125
DN_RemovePoints_min_05.ac3diff	DN_RemovePoints_min_05_ac3diff	correlation,outliers	1745	758	0.485027	0.000419841	0.485027
FC_LocalSimple_mean3.sws	FC_LocalSimple_mean3_sws	forecasting	3011	835	-0.484893	0.000419841	0.484893
DN_SimpleFit_gauss2_ks.r2	DN_SimpleFit_gauss2_r2_ks	distribution,gof,gauss2	3148	849	0.484862	0.000419841	0.484862
SC_FluctAnal_2_dfa_50_0_logi.logtausplit	SC_FluctAnal_2_dfa_50_0_logi_logtausplit	scaling	4059	899	0.484782	0.000419841	0.484782
SY_SlidingWindow_ac1_ent2_1	SY_SlidingWindow_ac1_ent2_1	stationarity	732	459	-0.484282	0.000419841	0.484282
SC_FluctAnal_2_dfa_50_1_3_logi.linfitint	SC_FluctAnal_2_dfa_50_1_3_logi_linfitint	scaling	4173	904	-0.483981	0.000419841	0.483981
SC_FluctAnal_2_endptdiff_50_logi.stdssr	SC_FluctAnal_2_endptdiff_50_logi_stdssr	scaling	3919	893	0.483649	0.000419841	0.483649
SY_SlidingWindow_ent_s2_2	SY_SlidingWindow_ent_s2_2	stationarity	605	332	-0.483531	0.000419841	0.483531
SY_SlidingWindow_mom4_ent2_2	SY_SlidingWindow_mom4_ent2_2	stationarity	687	414	-0.483332	0.000419841	0.483332
PP_Compare_diff1.swms5_2	PP_Compare_diff1_swms5_2	preprocessing,raw,stationarity	6104	968	-0.48321	0.000419841	0.48321
PP_Compare_diff1.statav6	PP_Compare_diff1_statav6	preprocessing,raw,stationarity	6099	968	-0.483059	0.000419841	0.483059
CP_ML_StepDetect_l1pwc_005.meanstepint	CP_ML_StepDetect_l1pwc_005_meanstepint	stepdetection	7787	1053	0.482871	0.000419841	0.482871
SY_SpreadRandomLocal_ac5_100.meanskew	SY_SpreadRandomLocal_ac5_100_meanskew	stationarity	2097	477	-0.482145	0.000419841	0.482145
SB_TransitionpAlphabet_20_ac.stdeigfexp_r2	SB_TransitionpAlphabet_20_ac_stdeigfexp_r2	symbolic,transitionmat	1503	740	-0.48213	0.000419841	0.48213
DN_OutlierInclude_p_001.stdrflb	DN_OutlierInclude_p_001_stdrflb	distribution,outliers	3277	864	-0.48132	0.000419841	0.48132
DN_OutlierInclude_n_001.stdrfexpr2	DN_OutlierInclude_n_001_stdrfexpr2	distribution,outliers	3304	865	0.481279	0.000419841	0.481279
NL_BoxCorrDim_50_ac_5.meanr18	NL_BoxCorrDim_50_ac_5_meanr18	nonlinear,correlation,tstool,dimension	5258	926	-0.47971	0.000419841	0.47971
SB_TransitionpAlphabet_20_ac.maxdiagfexp_rmse	SB_TransitionpAlphabet_20_ac_maxdiagfexp_rmse	symbolic,transitionmat	1487	740	0.479637	0.000419841	0.479637
SY_SpreadRandomLocal_ac5_100.stdac1	SY_SpreadRandomLocal_ac5_100_stdac1	stationarity	2108	477	-0.479243	0.000419841	0.479243
PP_Compare_spline44.olbt_m5	PP_Compare_spline44_olbt_m5	preprocessing,raw	6063	966	-0.479063	0.000419841	0.479063
FC_LocalSimple_mean4.sws	FC_LocalSimple_mean4_sws	forecasting	3021	836	-0.478925	0.000419841	0.478925
CO_AddNoise_ac_even_10.fitexpr2	CO_AddNoise_ac_even_10_fitexpr2	correlation,AMI,entropy	1214	724	-0.4788	0.000419841	0.4788
AC_10	AC_10	correlation	102	101	0.478782	0.000419841	0.478782
NL_TSTL_LargestLyap_n1_01_001_3_1_4.expfit_rmse	NL_TSTL_LargestLyap_n1_01_001_3_1_4_expfit_rmse	nonlinear,tstool	5741	945	-0.478589	0.000419841	0.478589
CP_ML_StepDetect_l1pwc_005.diffn12	CP_ML_StepDetect_l1pwc_005_diffn12	stepdetection	7785	1053	-0.478344	0.000419841	0.478344
NL_TSTL_dimensions_50_ac_fnnmar.scr_co_mopt_minbad	NL_TSTL_dimensions_50_ac_fnnmar_scr_co_mopt_minbad	nonlinear,tstool,scaling,dimension	5438	932	-0.478305	0.000419841	0.478305
CO_AddNoise_ac_kraskov1_4.fitexpr2	CO_AddNoise_ac_kraskov1_4_fitexpr2	correlation,AMI,entropy	1327	730	-0.47734	0.000419841	0.47734
EN_DistributionEntropy_hist_sqrt_0	EN_DistributionEntropy_hist_sqrt_0	entropy	895	536	0.477263	0.000419841	0.477263
CO_AddNoise_ac_quantiles_10.linfit_mse	CO_AddNoise_ac_quantiles_10_linfit_mse	correlation,AMI,entropy	1180	722	-0.477039	0.000419841	0.477039
CO_Embed2_Basic_tau.parabdown05_n1	CO_Embed2_Basic_tau_parabdown05_n1	correlation	1572	743	0.477035	0.000419841	0.477035
EN_Randomize_dyndist.d1fexprmse	EN_Randomize_dyndist_d1fexprmse	entropy,slow,lengthdep	2879	831	-0.47681	0.000419841	0.47681
EX_MovingThreshold_1_01.maxq	EX_MovingThreshold_1_01_maxq	outliers	3445	873	-0.476712	0.000419841	0.476712
SY_SlidingWindow_lil_s2_1	SY_SlidingWindow_lil_s2_1	stationarity	695	422	0.476361	0.000419841	0.476361
SY_SlidingWindow_lil_ent10_1	SY_SlidingWindow_lil_ent10_1	stationarity	715	442	0.476103	0.000419841	0.476103
DN_Moments_7	DN_Moments_7	distribution,moment,shape	27	26	-0.476082	0.000419841	0.476082
SY_LocalGlobal_l500.kurtosis	SY_LocalGlobal_kurtosis_l500	stationarity	832	499	-0.476062	0.000419841	0.476062
SB_TransitionMatrix_5ac.TD1	SB_TransitionMatrix_5ac_TD1	symbolic,transitionmat	1430	738	-0.475876	0.000419841	0.475876
SB_TransitionMatrix_5ac.maximeig	SB_TransitionMatrix_5ac_maximeig	symbolic,transitionmat	1443	738	0.475564	0.000419841	0.475564
SY_SlidingWindow_mom4_s2_2	SY_SlidingWindow_mom4_s2_2	stationarity	673	400	-0.475535	0.000419841	0.475535
MF_GP_hyperparameters_covSEiso_covNoise_1_200_resample.minS	MF_GP_hyperparameters_covSEiso_covNoise_1_200_resample_minS	model,GaussianProcess	6468	980	0.475309	0.000737727	0.475309
NL_BoxCorrDim_50_ac_5.medianr16	NL_BoxCorrDim_50_ac_5_medianr16	nonlinear,correlation,tstool,dimension	5251	926	-0.474991	0.000419841	0.474991
NL_BoxCorrDim_50_ac_5.meanchr2	NL_BoxCorrDim_50_ac_5_meanchr2	nonlinear,correlation,tstool,dimension	5197	926	-0.474837	0.000419841	0.474837
DN_OutlierInclude_n_001.stdrflb	DN_OutlierInclude_n_001_stdrflb	distribution,outliers	3307	865	-0.474302	0.000419841	0.474302
WL_coeffs_db3_3.wb50m	WL_coeffs_db3_3_wb50m	wavelet	6682	995	0.474227	0.000419841	0.474227
CP_ML_StepDetect_l1pwc_005.ratn12	CP_ML_StepDetect_l1pwc_005_ratn12	stepdetection	7784	1053	0.474122	0.000419841	0.474122
CO_StickAngles_y.q10_all	CO_StickAngles_y_q10_all	correlation	1901	766	-0.473816	0.000419841	0.473816
SD_TSTL_surrogates_1_100_2_tc3.kspminfromext	SD_TSTL_surrogates_1_100_2_tc3_kspminfromext	nonlinear,tstool,correlation,surrogate	5814	951	0.473772	0.000419841	0.473772
PH_ForcePotential_sine_3_05_1.ac50	PH_ForcePotential_sine_3_05_1_ac50	dynamicalSystem	1650	749	-0.473762	0.000419841	0.473762
NL_TSTL_dimensions_50_ac_fnnmar.scr_bc_mopt_pgone	NL_TSTL_dimensions_50_ac_fnnmar_scr_bc_mopt_pgone	nonlinear,tstool,scaling,dimension	5406	932	-0.473333	0.000419841	0.473333
MF_FitSubsegments_arma_2_2_uniform_25_01.p_2_mean	MF_FitSubsegments_arma_2_2_uniform_25_01_p_2_mean	model,prediction	7147	1019	-0.473188	0.000419841	0.473188
MF_StateSpace_n4sid_2_05_1.k_1	MF_StateSpace_n4sid_2_05_1_k_1	model	7283	1026	0.473	0.000419841	0.473
MF_StateSpace_n4sid_2_05_1.c_1	MF_StateSpace_n4sid_2_05_1_c_1	model	7285	1026	0.472954	0.000419841	0.472954
DN_OutlierInclude_p_001.mrstd	DN_OutlierInclude_p_001_mrstd	distribution,outliers	3268	864	-0.472402	0.000419841	0.472402
SD_SurrogateTest_RP_99.tc3_prank	SD_SurrogateTest_RP_99_tc3_prank	surrogate,nonlinearity	7857	1062	0.472157	0.000737727	0.472157
DN_OutlierInclude_p_001.nfexpr2	DN_OutlierInclude_p_001_nfexpr2	distribution,outliers	3257	864	-0.472154	0.000419841	0.472154
MF_GP_hyperparameters_covSEiso_covNoise_1_200_resample.meanS	MF_GP_hyperparameters_covSEiso_covNoise_1_200_resample_meanS	model,GaussianProcess	6469	980	0.471904	0.000737727	0.471904
MF_FitSubsegments_ar_2_uniform_25_01.a_2_max	MF_FitSubsegments_ar_2_uniform_25_01_a_2_max	model,prediction	7130	1017	-0.471814	0.000419841	0.471814
FC_LocalSimple_median5.sws	FC_LocalSimple_median5_sws	forecasting	3072	840	-0.471561	0.000419841	0.471561
DN_OutlierInclude_n_001.stdrfexpc	DN_OutlierInclude_n_001_stdrfexpc	distribution,outliers	3303	865	0.471415	0.000419841	0.471415
MF_StateSpace_n4sid_2_05_1.x0mod	MF_StateSpace_n4sid_2_05_1_x0mod	model	7287	1026	0.471152	0.000419841	0.471152
CO_tc3_1.abs	CO_tc3_1_abs	correlation,nonlinear	1095	703	-0.47085	0.000419841	0.47085
CO_trev_mi.num	CO_trev_mi_num	correlation,nonlinear	1141	712	0.470768	0.000419841	0.470768
PP_Compare_diff1.swms5_1	PP_Compare_diff1_swms5_1	preprocessing,raw,stationarity	6103	968	-0.470749	0.000419841	0.470749
PP_Compare_sin2.swss10_2	PP_Compare_sin2_swss10_2	preprocessing,raw,stationarity	5987	964	0.47049	0.000737727	0.47049
TSTL_delaytime_01_1.tau2	TSTL_delaytime_01_1_tau2	nonlinear,correlation,tstool,tau	5323	931	0.469959	0.000419841	0.469959
NL_TISEAN_c1_1_2_6_25_01.meanstd	NL_TISEAN_c1_1_2_6_25_01_meanstd	nonlinear,tisean,dimension,entropy	5076	923	-0.469899	0.000419841	0.469899
PP_Compare_spline64.swss5_1	PP_Compare_spline64_swss5_1	preprocessing,raw,stationarity	6077	967	-0.469163	0.000419841	0.469163
PP_Compare_resample_1_2.swss2_1	PP_Compare_resample_1_2_swss2_1	preprocessing,raw,stationarity	6385	977	0.469136	0.000419841	0.469136
MF_GP_hyperparameters_covSEiso_covNoise_1_200_resample.maxS	MF_GP_hyperparameters_covSEiso_covNoise_1_200_resample_maxS	model,GaussianProcess	6467	980	0.468611	0.000419841	0.468611
SY_SpreadRandomLocal_ac2_100.meanskew	SY_SpreadRandomLocal_ac2_100_meanskew	stationarity	2081	476	-0.468563	0.000419841	0.468563
SY_TISEAN_nstat_z_4_1_3.mineig	SY_TISEAN_nstat_z_4_1_3_mineig	nonlinear,tisean,model,stationarity	4926	918	0.468178	0.000419841	0.468178
MF_GP_hyperparameters_covSEiso_covNoise_1_200_resample.std_S_data	MF_GP_hyperparameters_covSEiso_covNoise_1_200_resample_std_S_data	model,GaussianProcess	6466	980	0.468042	0.000419841	0.468042
NL_TSTL_acp_mi_1__10.iqracpf_3	NL_TSTL_acp_mi_1__10_iqracpf_3	nonlinear,correlation	5101	924	-0.467981	0.000419841	0.467981
NL_BoxCorrDim_50_ac_5.medianr3	NL_BoxCorrDim_50_ac_5_medianr3	nonlinear,correlation,tstool,dimension	5199	926	-0.467818	0.000419841	0.467818
EN_Randomize_statdist.d1fexpb	EN_Randomize_statdist_d1fexpb	entropy,slow	2813	830	-0.467706	0.000419841	0.467706
NL_TSTL_dimensions_50_ac_fnnmar.scr_bc_mopt_logrrange	NL_TSTL_dimensions_50_ac_fnnmar_scr_bc_mopt_logrrange	nonlinear,tstool,scaling,dimension	5405	932	-0.467674	0.000419841	0.467674
NL_BoxCorrDim_50_ac_5.stdmean	NL_BoxCorrDim_50_ac_5_stdmean	nonlinear,correlation,tstool,dimension	5262	926	0.467615	0.000419841	0.467615
SB_TransitionpAlphabet_20_ac.maxdiagfexp_r2	SB_TransitionpAlphabet_20_ac_maxdiagfexp_r2	symbolic,transitionmat	1486	740	-0.467553	0.000419841	0.467553
HT_DistributionTest_chi2ev100	HT_DistributionTest_chi2ev100	hypothesistest,distribution,raw	972	592	0.467537	0.000419841	0.467537
SY_LocalGlobal_p01.median	SY_LocalGlobal_median_p01	stationarity	791	500	0.467296	0.000419841	0.467296
FC_LocalSimple_mean2.meanerr	FC_LocalSimple_mean2_meanerr	forecasting	2998	834	0.467253	0.000419841	0.467253
SB_TransitionMatrix_2ac.T4	SB_TransitionMatrix_2ac_T4	symbolic,transitionmat	1386	735	-0.466783	0.000419841	0.466783
NL_TSTL_dimensions_50_ac_fnnmar.scr_bc_mopt_logrmin	NL_TSTL_dimensions_50_ac_fnnmar_scr_bc_mopt_logrmin	nonlinear,tstool,scaling,dimension	5403	932	0.466613	0.000419841	0.466613
SD_SurrogateTest_RP_99.tc3_p	SD_SurrogateTest_RP_99_tc3_p	surrogate,nonlinearity	7853	1062	0.466431	0.000737727	0.466431
SY_LocalGlobal_unicg50.median	SY_LocalGlobal_median_unicg50	stationarity	797	506	0.466358	0.000419841	0.466358
FC_LocalSimple_mean2.sws	FC_LocalSimple_mean2_sws	forecasting	3001	834	-0.466291	0.000419841	0.466291
SY_SlidingWindow_s_s2_1	SY_SlidingWindow_s_s2_1	stationarity	581	308	-0.46562	0.000419841	0.46562
ST_LocalExtrema_n100.zcext	ST_LocalExtrema_n100_zcext	distribution,stationarity	3412	870	-0.465189	0.000737727	0.465189
SY_LocalGlobal_l20.kurtosis	SY_LocalGlobal_kurtosis_l20	stationarity	829	496	-0.464865	0.000419841	0.464865
CO_AddNoise_ac_even_10.linfit_mse	CO_AddNoise_ac_even_10_linfit_mse	correlation,AMI,entropy	1218	724	-0.46481	0.000419841	0.46481
CO_trev_mi.raw	CO_trev_mi_raw	correlation,nonlinear	1139	712	0.464577	0.000419841	0.464577
PH_ForcePotential_sine_10_004_10.ac50	PH_ForcePotential_sine_10_004_10_ac50	dynamicalSystem	1672	751	-0.464487	0.000419841	0.464487
HT_DistributionTest_chi2ev50	HT_DistributionTest_chi2ev50	hypothesistest,distribution,raw	971	591	0.464312	0.000419841	0.464312
SY_SpreadRandomLocal_ac5_100.stdstd	SY_SpreadRandomLocal_ac5_100_stdstd	stationarity	2104	477	-0.464173	0.000419841	0.464173
PP_Compare_spline64.swss2_2	PP_Compare_spline64_swss2_2	preprocessing,raw,stationarity	6076	967	-0.464132	0.000419841	0.464132
SY_LocalGlobal_l500.iqr	SY_LocalGlobal_iqr_l500	stationarity	804	499	-0.4639	0.000419841	0.4639
WL_cwt_sym2_32.maxonmed_ssc	WL_cwt_sym2_32_maxonmed_ssc	wavelet,cwt	6628	990	-0.462485	0.000419841	0.462485
SY_SpreadRandomLocal_100_100.stdkurt	SY_SpreadRandomLocal_100_100_stdkurt	stationarity	2138	479	-0.462237	0.000419841	0.462237
WL_cwt_db3_32.meanC	WL_cwt_db3_32_meanC	wavelet,cwt	6585	989	0.462037	0.000419841	0.462037
SC_FluctAnal_2_std_50_logi.prop_r1	SC_FluctAnal_2_std_50_logi_prop_r1	scaling	3964	895	0.46199	0.000737727	0.46199
PP_Compare_spline44.olbt_m2	PP_Compare_spline44_olbt_m2	preprocessing,raw	6062	966	-0.461746	0.000419841	0.461746
WL_cwt_sym2_32.meanC	WL_cwt_sym2_32_meanC	wavelet,cwt	6611	990	-0.461482	0.000419841	0.461482
SC_FluctAnal_2_std_50_logi.logtausplit	SC_FluctAnal_2_std_50_logi_logtausplit	scaling	3963	895	0.461237	0.000737727	0.461237
PP_Compare_rav2.swss2_1	PP_Compare_rav2_swss2_1	preprocessing,raw,stationarity	6261	973	0.461198	0.000419841	0.461198
DN_RemovePoints_min_05.kurtosisrat	DN_RemovePoints_min_05_kurtosisrat	correlation,outliers,distribution	1750	758	-0.461049	0.000419841	0.461049
PP_Compare_spline24.kscn_adiff	PP_Compare_spline24_kscn_adiff	preprocessing,raw	6024	965	-0.460678	0.000419841	0.460678
SY_SpreadRandomLocal_100_100.stdtaul	SY_SpreadRandomLocal_100_100_stdtaul	stationarity	2142	479	0.460674	0.000419841	0.460674
MF_ExpSmoothing_05_best.meane	MF_ExpSmoothing_05_best_meane	model	7508	1034	0.460516	0.000419841	0.460516
PH_ForcePotential_sine_10_004_10.proppos	PH_ForcePotential_sine_10_004_10_proppos	dynamicalSystem	1668	751	0.460287	0.000419841	0.460287
CO_AddNoise_ac_std1_10.firstUnder75	CO_AddNoise_ac_std1_10_firstUnder75	correlation,AMI,entropy	1243	726	0.46013	0.000419841	0.46013
DN_CompareKSFit_ev.olapint	DN_CompareKSFit_ev_olapint	distribution,ksdensity,raw,locdep	3181	855	0.459071	0.000419841	0.459071
CO_AddNoise_ac_quantiles_10.fitlina	CO_AddNoise_ac_quantiles_10_fitlina	correlation,AMI,entropy	1178	722	0.4587	0.000419841	0.4587
CO_AddNoise_ac_quantiles_10.fitexpb	CO_AddNoise_ac_quantiles_10_fitexpb	correlation,AMI,entropy	1175	722	0.458637	0.000419841	0.458637
CO_AddNoise_ac_quantiles_10.fitexprmse	CO_AddNoise_ac_quantiles_10_fitexprmse	correlation,AMI,entropy	1177	722	-0.458581	0.000419841	0.458581
CO_TranslateShape_rectangle_2_pts.mean	CO_TranslateShape_rectangle_2_pts_mean	correlation	1831	765	0.458514	0.000419841	0.458514
NL_BoxCorrDim_50_ac_5.minr13	NL_BoxCorrDim_50_ac_5_minr13	nonlinear,correlation,tstool,dimension	5240	926	0.458417	0.000737727	0.458417
SY_LocalGlobal_p5.iqr	SY_LocalGlobal_iqr_p5	stationarity	808	503	-0.458115	0.000419841	0.458115
CO_StickAngles_y.q90_n	CO_StickAngles_y_q90_n	correlation	1898	766	0.457544	0.000419841	0.457544
DN_RemovePoints_absclose_05.fzcacrat	DN_RemovePoints_absclose_05_fzcacrat	correlation,outliers	1687	753	-0.457469	0.000419841	0.457469
PP_Compare_spline44.statav4	PP_Compare_spline44_statav4	preprocessing,raw,stationarity	6036	966	0.457419	0.000419841	0.457419
AC_22	AC_22	correlation	114	113	0.457161	0.000419841	0.457161
CO_AddNoise_ac_even_10.fitexprmse	CO_AddNoise_ac_even_10_fitexprmse	correlation,AMI,entropy	1215	724	-0.457074	0.000419841	0.457074
MF_CompareTestSets_y_ar_best_uniform_25_01_1.rmserr_std	MF_CompareTestSets_y_ar_best_uniform_25_01_1_rmserr_std	model,prediction,arfit,stationarity	7180	1021	-0.456584	0.000419841	0.456584
SY_LocalGlobal_l50.kurtosis	SY_LocalGlobal_kurtosis_l50	stationarity	830	497	-0.456563	0.000419841	0.456563
SB_TransitionMatrix_3ac.maxeig	SB_TransitionMatrix_3ac_maxeig	symbolic,transitionmat	1408	736	0.456363	0.000419841	0.456363
PH_Walker_runningvar_15_50.sw_maxrat	PH_Walker_runningvar_15_50_sw_maxrat	trend	2691	819	-0.456106	0.000737727	0.456106
SY_SlidingWindow_ent_ent2_2	SY_SlidingWindow_ent_ent2_2	stationarity	618	345	-0.455975	0.000419841	0.455975
SC_FluctAnal_2_rsrangefit_50_1_logi.linfitint	SC_FluctAnal_2_rsrangefit_50_1_logi_linfitint	scaling	4029	898	-0.455927	0.000419841	0.455927
NW_VisibilityGraph_norm.dexpk_resAC1	NW_VisibilityGraph_norm_dexpk_resAC1	network,visibilityGraph	2050	773	-0.455405	0.000737727	0.455405
NL_TSTL_dimensions_50_ac_fnnmar.scr_bc_mopt_minbad	NL_TSTL_dimensions_50_ac_fnnmar_scr_bc_mopt_minbad	nonlinear,tstool,scaling,dimension	5402	932	-0.455345	0.000419841	0.455345
CP_ML_StepDetect_l1pwc_005.nsegments	CP_ML_StepDetect_l1pwc_005_nsegments	stepdetection	7781	1053	-0.4545	0.000737727	0.4545
PP_Compare_spline44.gauss1_kd_resruns	PP_Compare_spline44_gauss1_kd_resruns	preprocessing,raw	6054	966	0.454091	0.000419841	0.454091
CO_AddNoise_ac_std1_10.linfit_mse	CO_AddNoise_ac_std1_10_linfit_mse	correlation,AMI,entropy	1256	726	-0.453919	0.000419841	0.453919
NL_TSTL_dimensions_50_ac_fnnmar.scr_bc_m3_meansqres	NL_TSTL_dimensions_50_ac_fnnmar_scr_bc_m3_meansqres	nonlinear,tstool,scaling,dimension	5399	932	-0.453793	0.000419841	0.453793
EN_PermEn_2_ac.normPermEn	EN_PermEn_2_ac_normPermEn	entropy	924	565	0.452605	0.000419841	0.452605
EX_MovingThreshold_01_01.stdq	EX_MovingThreshold_01_01_stdq	outliers	3425	871	-0.452496	0.000419841	0.452496
MF_CompareTestSets_y_ss_2_uniform_25_01_1.rmserr_std	MF_CompareTestSets_y_ss_2_uniform_25_01_1_rmserr_std	model,prediction,stationarity	7220	1023	-0.452326	0.000419841	0.452326
SY_SlidingWindow_sampen_s5_2	SY_SlidingWindow_sampen_s5_2	stationarity	630	357	-0.452159	0.000419841	0.452159
CO_Embed2_tau.eucds2	CO_Embed2_tau_eucds2	correlation,embedding	1929	767	0.452071	0.000419841	0.452071
FC_Surprise_T2_100_tau_m2quad_500.tstat	FC_Surprise_T2_100_tau_m2quad_500_tstat	information,symbolic	2517	810	0.45174	0.000419841	0.45174
SY_DynWin10.stdac2	SY_DynWin_stdac2	stationarity	2075	774	0.451726	0.000737727	0.451726
SY_SlidingWindow_sampen_ent5_2	SY_SlidingWindow_sampen_ent5_2	stationarity	644	371	-0.451698	0.000419841	0.451698
NL_TSTL_dimensions_50_ac_fnnmar.scr_bc_m3_logrrange	NL_TSTL_dimensions_50_ac_fnnmar_scr_bc_m3_logrrange	nonlinear,tstool,scaling,dimension	5396	932	0.451432	0.000419841	0.451432
MF_StateSpace_n4sid_1_05_1.k_1	MF_StateSpace_n4sid_1_05_1_k_1	model	7247	1025	0.451161	0.000419841	0.451161
MF_CompareAR_1_10_all.where01max	MF_CompareAR_1_10_all_where01max	model	7373	1028	-0.45084	0.000419841	0.45084
ST_LocalExtrema_l100.stdmax	ST_LocalExtrema_l100_stdmax	distribution,stationarity	3343	867	-0.450831	0.000419841	0.450831
NL_TSTL_FractalDimensions_2_100_02_1_5_10_32_1_5.linfit_rmsqres	NL_TSTL_FractalDimensions_2_100_02_1_5_10_32_1_5_linfit_rmsqres	nonlinear,tstool,dimension,correlation,stochastic	5490	936	-0.450771	0.000419841	0.450771
FC_Surprise_dist_100_4_udq_500.tstat	FC_Surprise_dist_100_4_udq_500_tstat	information,symbolic	2367	791	0.450259	0.000419841	0.450259
EN_DistributionEntropy_hist_auto_0	EN_DistributionEntropy_hist_auto_0	entropy	894	535	0.450135	0.00106923	0.450135
DN_Moments_5	DN_Moments_5	distribution,moment,shape	25	24	-0.450002	0.000419841	0.450002
SY_SpreadRandomLocal_200_100.meanskew	SY_SpreadRandomLocal_200_100_meanskew	stationarity	2145	480	-0.449916	0.000419841	0.449916
MF_arfit_1_8_sbc.minA	MF_arfit_1_8_sbc_minA	modelfit,arfit	6766	1002	0.449639	0.000737727	0.449639
MF_StateSpace_n4sid_3_05_1.x0mod	MF_StateSpace_n4sid_3_05_1_x0mod	model	7332	1027	0.449566	0.000419841	0.449566
SY_SpreadRandomLocal_100_100.meanmean	SY_SpreadRandomLocal_100_100_meanmean	stationarity	2127	479	-0.449122	0.000419841	0.449122
PP_Compare_spline64.statav4	PP_Compare_spline64_statav4	preprocessing,raw,stationarity	6067	967	0.448956	0.000419841	0.448956
MF_FitSubsegments_arma_2_2_uniform_25_01.p_2_min	MF_FitSubsegments_arma_2_2_uniform_25_01_p_2_min	model,prediction	7149	1019	-0.44878	0.000419841	0.44878
MF_CompareTestSets_y_ar_best_uniform_25_01_1.rmserr_iqr	MF_CompareTestSets_y_ar_best_uniform_25_01_1_rmserr_iqr	model,prediction,arfit,stationarity	7181	1021	-0.448728	0.000419841	0.448728
FC_Surprise_dist_100_4_udq_500.std	FC_Surprise_dist_100_4_udq_500_std	information,symbolic	2366	791	-0.448723	0.000419841	0.448723
PH_Walker_momentum_2.w_median	PH_Walker_momentum_2_w_median	trend	2639	817	0.448327	0.000419841	0.448327
SY_SpreadRandomLocal_ac5_100.stdsampen1_015	SY_SpreadRandomLocal_ac5_100_stdsampen1_015	stationarity	2107	477	-0.448232	0.000419841	0.448232
FC_LocalSimple_mean3.meanerr	FC_LocalSimple_mean3_meanerr	forecasting	3008	835	0.448029	0.000419841	0.448029
MF_hmm_08_2.LLtestpersample	MF_hmm_08_2_LLtestpersample	hmm,model	7743	1049	0.447806	0.000419841	0.447806
CO_AddNoise_ac_kraskov1_4.ac1	CO_AddNoise_ac_kraskov1_4_ac1	correlation,AMI,entropy	1316	730	-0.44773	0.000419841	0.44773
FC_Surprise_dist_50_3_udq_500.min	FC_Surprise_dist_50_3_udq_500_min	information,symbolic	2352	790	0.447513	0.000737727	0.447513
CO_StickAngles_y.q90_all	CO_StickAngles_y_q90_all	correlation	1902	766	0.447469	0.000419841	0.447469
PP_Compare_medianf3.gauss1_kd_resruns	PP_Compare_medianf3_gauss1_kd_resruns	preprocessing,raw	6178	970	-0.447442	0.000419841	0.447442
ST_LocalExtrema_l100.maxabsext	ST_LocalExtrema_l100_maxabsext	distribution,stationarity	3353	867	-0.447293	0.000419841	0.447293
SB_BinaryStats_mean.diff21stretch0	SB_BinaryStats_mean_diff21stretch0	distribution,stationarity	3486	876	-0.447125	0.000419841	0.447125
FC_Surprise_dist_100_5_udq_500.std	FC_Surprise_dist_100_5_udq_500_std	information,symbolic	2374	792	-0.446929	0.000419841	0.446929
MF_CompareTestSets_y_ss_best_uniform_25_01_1.rmserr_std	MF_CompareTestSets_y_ss_best_uniform_25_01_1_rmserr_std	model,prediction,stationarity	7200	1022	-0.446836	0.000419841	0.446836
DN_HistogramMode_5	DN_HistogramMode_5	distribution,location	11	10	-0.446519	0.000419841	0.446519
FC_Surprise_dist_5_2_udq_500.tstat	FC_Surprise_dist_5_2_udq_500_tstat	information,symbolic	2343	788	-0.446204	0.000737727	0.446204
SB_MotifThree_diffquant.abac	SB_MotifThree_diffquant_abac	symbolic,motifs	3764	882	0.446062	0.000737727	0.446062
NL_MS_fnn_1_10_mi_5_1.stdpfnn	NL_MS_fnn_1_10_mi_5_1_stdpfnn	nonlinear,fnn,slow	6821	1003	0.446022	0.000419841	0.446022
EN_DistributionEntropy_ks__002	EN_DistributionEntropy_ks__002	entropy	879	520	-0.445868	0.000419841	0.445868
MF_GP_hyperparameters_covSEiso_covNoise_1_200_resample.logh1	MF_GP_hyperparameters_covSEiso_covNoise_1_200_resample_logh1	model,GaussianProcess	6459	980	0.445026	0.000419841	0.445026
FC_Surprise_dist_100_5_udq_500.tstat	FC_Surprise_dist_100_5_udq_500_tstat	information,symbolic	2375	792	0.444861	0.000419841	0.444861
SY_LocalGlobal_l10.median	SY_LocalGlobal_median_l10	stationarity	786	495	0.443973	0.000419841	0.443973
MF_CompareTestSets_y_ar_4_rand_25_01_1.mabserr_iqr	MF_CompareTestSets_y_ar_4_rand_25_01_1_mabserr_iqr	model,prediction,stationarity	7165	1020	-0.443936	0.000419841	0.443936
DN_OutlierInclude_abs_001.nfexpr2	DN_OutlierInclude_abs_001_nfexpr2	distribution,outliers	3226	863	-0.443275	0.000419841	0.443275
EN_mse_1-10_2_015.minSampEn	EN_mse_1-10_2_015_minSampEn	entropy,sampen,mse	2758	827	0.443247	0.000419841	0.443247
CO_AddNoise_ac_std1_10.fitexprmse	CO_AddNoise_ac_std1_10_fitexprmse	correlation,AMI,entropy	1253	726	-0.442538	0.000419841	0.442538
NL_TSTL_dimensions_50_ac_fnnmar.scr_bc_m3_minbad	NL_TSTL_dimensions_50_ac_fnnmar_scr_bc_m3_minbad	nonlinear,tstool,scaling,dimension	5393	932	0.442428	0.000419841	0.442428
MF_CompareTestSets_y_ss_2_uniform_25_01_1.rmserr_iqr	MF_CompareTestSets_y_ss_2_uniform_25_01_1_rmserr_iqr	model,prediction,stationarity	7221	1023	-0.442198	0.000419841	0.442198
SY_KPSStest_2.stat	SY_KPSStest_2_stat	stationarity,hypothesistest	7710	1046	0.44196	0.000419841	0.44196
CO_trev_ac.absnum	CO_trev_ac_absnum	correlation,nonlinear	1137	711	-0.44194	0.000419841	0.44194
SB_TransitionpAlphabet_20_ac.stdeigfexp_rmse	SB_TransitionpAlphabet_20_ac_stdeigfexp_rmse	symbolic,transitionmat	1504	740	0.441118	0.000419841	0.441118
DN_OutlierInclude_n_001.mrstd	DN_OutlierInclude_n_001_mrstd	distribution,outliers	3298	865	-0.440997	0.000419841	0.440997
WL_cwt_db3_32.maxonmed_ssc	WL_cwt_db3_32_maxonmed_ssc	wavelet,cwt	6602	989	-0.440992	0.00106923	0.440992
CO_StickAngles_y.q90_p	CO_StickAngles_y_q90_p	correlation	1894	766	0.440986	0.000419841	0.440986
CO_AddNoise_ac_quantiles_10.pdec	CO_AddNoise_ac_quantiles_10_pdec	correlation,AMI,entropy	1163	722	-0.4407	0.000419841	0.4407
EN_DistributionEntropy_hist_10_001	EN_DistributionEntropy_hist_10_001	entropy	898	539	-0.440567	0.000419841	0.440567
EN_DistributionEntropy_hist_sturges_0	EN_DistributionEntropy_hist_sturges_0	entropy	897	538	0.44006	0.00106923	0.44006
CO_TranslateShape_rectangle_2_pts.statav2_s	CO_TranslateShape_rectangle_2_pts_statav2_s	correlation,stationarity	1840	765	-0.439645	0.000419841	0.439645
SB_TransitionpAlphabet_20_ac.mineigfexp_r2	SB_TransitionpAlphabet_20_ac_mineigfexp_r2	symbolic,transitionmat	1511	740	-0.439624	0.000419841	0.439624
MF_FitSubsegments_arma_2_2_uniform_25_01.q_2_mean	MF_FitSubsegments_arma_2_2_uniform_25_01_q_2_mean	model,prediction	7155	1019	-0.439391	0.000419841	0.439391
MD_hrv_classic.vlf	MD_hrv_classic_vlf	medical	7760	1051	0.439219	0.000419841	0.439219
NL_TSTL_acp_mi_1__10.sacpf_5	NL_TSTL_acp_mi_1__10_sacpf_5	nonlinear,correlation	5108	924	-0.439216	0.000419841	0.439216
FC_Surprise_dist_20_2_q_500.mean	FC_Surprise_dist_20_2_q_500_mean	information,symbolic	2242	776	-0.43879	0.000419841	0.43879
MF_ExpSmoothing_05_best.normp	MF_ExpSmoothing_05_best_normp	model	7533	1034	0.43869	0.000419841	0.43869
SY_SpreadRandomLocal_200_100.meantaul	SY_SpreadRandomLocal_200_100_meantaul	stationarity	2150	480	0.438634	0.000737727	0.438634
MF_hmm_08_2.stdmeanP	MF_hmm_08_2_stdmeanP	hmm,model	7738	1049	-0.438411	0.000419841	0.438411
MF_ExpSmoothing_05_best.normksstat	MF_ExpSmoothing_05_best_normksstat	model	7532	1034	-0.438148	0.000419841	0.438148
CO_trev_ac.abs	CO_trev_ac_abs	correlation,nonlinear	1135	711	-0.43812	0.000419841	0.43812
SB_TransitionpAlphabet_20_ac.trcovfexp_a	SB_TransitionpAlphabet_20_ac_trcovfexp_a	symbolic,transitionmat	1497	740	-0.437532	0.000419841	0.437532
SY_LocalGlobal_p05.kurtosis	SY_LocalGlobal_kurtosis_p05	stationarity	834	501	-0.437334	0.000419841	0.437334
DN_RemovePoints_max_08.kurtosisrat	DN_RemovePoints_max_08_kurtosisrat	correlation,outliers,distribution	1780	761	0.437316	0.000737727	0.437316
FC_LocalSimple_median7.sws	FC_LocalSimple_median7_sws	forecasting	3082	841	-0.437047	0.000419841	0.437047
NL_TSTL_dimensions_50_ac_fnnmar.scr_bc_mopt_meansqres	NL_TSTL_dimensions_50_ac_fnnmar_scr_bc_mopt_meansqres	nonlinear,tstool,scaling,dimension	5408	932	-0.436875	0.000419841	0.436875
FC_Surprise_T2_100_4_q_500.mean	FC_Surprise_T2_100_4_q_500_mean	information,symbolic	2322	786	-0.436435	0.000737727	0.436435
CO_tc3_1.raw	CO_tc3_1_raw	correlation,nonlinear	1094	703	-0.436233	0.000419841	0.436233
CO_AddNoise_ac_std1_10.fitlina	CO_AddNoise_ac_std1_10_fitlina	correlation,AMI,entropy	1254	726	0.436228	0.000419841	0.436228
SD_TSTL_surrogates_1_100_2_tc3.normpatponmax	SD_TSTL_surrogates_1_100_2_tc3_normpatponmax	nonlinear,tstool,correlation,surrogate	5810	951	0.436003	0.000737727	0.436003
MF_CompareTestSets_y_ss_best_uniform_25_01_1.rmserr_iqr	MF_CompareTestSets_y_ss_best_uniform_25_01_1_rmserr_iqr	model,prediction,stationarity	7201	1022	-0.435387	0.000419841	0.435387
WL_dwtcoeff_db3_5.mind_l3	WL_dwtcoeff_db3_5_mind_l3	wavelet,dwt	6728	1000	0.435386	0.00106923	0.435386
PP_Compare_medianf4.swss2_1	PP_Compare_medianf4_swss2_1	preprocessing,raw,stationarity	6199	971	0.435319	0.000419841	0.435319
HT_DistributionTest_chi2wbl100	HT_DistributionTest_chi2wbl100	hypothesistest,distribution,raw,locdep,posOnly	1007	627	0.435234	0.000419841	0.435234
FC_LocalSimple_meantau.taures	FC_LocalSimple_meantau_taures	forecasting	3036	837	0.435085	0.000737727	0.435085
CO_StickAngles_y.q10_p	CO_StickAngles_y_q10_p	correlation	1893	766	-0.435067	0.000419841	0.435067
PP_Compare_resample_2_1.swss2_2	PP_Compare_resample_2_1_swss2_2	preprocessing,raw,stationarity	6417	978	0.434985	0.000737727	0.434985
DN_RemovePoints_max_08.mean	DN_RemovePoints_max_08_mean	correlation,outliers	1777	761	-0.434375	0.000419841	0.434375
HT_DistributionTest_chi2wbl50	HT_DistributionTest_chi2wbl50	hypothesistest,distribution,raw,locdep,posOnly	1006	626	0.434142	0.000419841	0.434142
DN_Quantile_96	quantile_96	distribution	82	79	-0.43404	0.000419841	0.43404
MF_ExpSmoothing_05_best.p5_5	MF_ExpSmoothing_05_best_p5_5	model	7517	1034	0.433681	0.000419841	0.433681
SB_TransitionMatrix_3ac.symdiff	SB_TransitionMatrix_3ac_symdiff	symbolic,transitionmat	1404	736	0.433654	0.000419841	0.433654
NL_TSTL_dimensions_50_ac_fnnmar.scr_bc_m2_scaling_exp	NL_TSTL_dimensions_50_ac_fnnmar_scr_bc_m2_scaling_exp	nonlinear,tstool,scaling,dimension	5391	932	0.432797	0.000419841	0.432797
DN_RemovePoints_min_08.fzcacrat	DN_RemovePoints_min_08_fzcacrat	correlation,outliers	1751	759	-0.432719	0.000419841	0.432719
MF_FitSubsegments_ar_2_uniform_25_01.a_2_mean	MF_FitSubsegments_ar_2_uniform_25_01_a_2_mean	model,prediction	7129	1017	-0.432692	0.000737727	0.432692
NL_TSTL_FractalDimensions_2_10_n1_1_5_10_32_1_5.linfit_rmsqres	NL_TSTL_FractalDimensions_2_10_n1_1_5_10_32_1_5_linfit_rmsqres	nonlinear,tstool,dimension,correlation	5499	937	-0.432616	0.000419841	0.432616
DN_CompareKSFit_wbl.olapint	DN_CompareKSFit_wbl_olapint	distribution,ksdensity,raw,posOnly	3216	862	0.432528	0.000419841	0.432528
CO_AddNoise_ac_std1_10.meanch	CO_AddNoise_ac_std1_10_meanch	correlation,AMI,entropy	1240	726	0.432162	0.000419841	0.432162
DN_OutlierTest2.mean	DN_OutlierTest2_mean	spread,distribution,outliers	1041	647	0.43213	0.000419841	0.43213
SY_SlidingWindow_s_ent2_1	SY_SlidingWindow_s_ent2_1	stationarity	595	322	-0.43116	0.000419841	0.43116
CO_AddNoise_ac_std1_10.fitexpb	CO_AddNoise_ac_std1_10_fitexpb	correlation,AMI,entropy	1251	726	0.430637	0.000419841	0.430637
CO_AddNoise_ac_quantiles_10.meanch	CO_AddNoise_ac_quantiles_10_meanch	correlation,AMI,entropy	1164	722	0.430601	0.000419841	0.430601
SC_FluctAnal_2_dfa_50_2_logi.logtausplit	SC_FluctAnal_2_dfa_50_2_logi_logtausplit	scaling	4107	901	0.430562	0.000419841	0.430562
SC_FluctAnal_2_dfa_50_2_logi.prop_r1	SC_FluctAnal_2_dfa_50_2_logi_prop_r1	scaling	4108	901	0.430542	0.000419841	0.430542
PH_Walker_biasprop_01_05.res_swss5_1	PH_Walker_biasprop_01_05_swss5_1	trend,stationarity	2636	816	-0.430498	0.000419841	0.430498
SC_FluctAnal_2_dfa_50_3_logi.logtausplit	SC_FluctAnal_2_dfa_50_3_logi_logtausplit	scaling	4131	902	0.430284	0.000419841	0.430284
SC_FluctAnal_2_dfa_50_3_logi.prop_r1	SC_FluctAnal_2_dfa_50_3_logi_prop_r1	scaling	4132	902	0.43021	0.000419841	0.43021
CO_AddNoise_ac_kraskov1_4.fitlina	CO_AddNoise_ac_kraskov1_4_fitlina	correlation,AMI,entropy	1329	730	0.430192	0.000419841	0.430192
NL_TSTL_acp_mi_1__10.sacpf_3	NL_TSTL_acp_mi_1__10_sacpf_3	nonlinear,correlation	5100	924	-0.429885	0.000419841	0.429885
NL_BoxCorrDim_50_ac_5.meanchr10	NL_BoxCorrDim_50_ac_5_meanchr10	nonlinear,correlation,tstool,dimension	5229	926	0.429606	0.000419841	0.429606
PP_Compare_spline64.gauss1_kd_resAC1	PP_Compare_spline64_gauss1_kd_resAC1	preprocessing,raw	6083	967	-0.429558	0.000419841	0.429558
SY_SlidingWindow_lil_ent10_10	SY_SlidingWindow_lil_ent10_10	stationarity	717	444	0.429528	0.000737727	0.429528
SB_TransitionpAlphabet_40_1.trcovfexp_b	SB_TransitionpAlphabet_40_1_trcovfexp_b	symbolic,transitionmat	1465	739	-0.428761	0.000419841	0.428761
PH_Walker_runningvar_15_50.w_median	PH_Walker_runningvar_15_50_w_median	trend	2679	819	0.428479	0.000419841	0.428479
DN_OutlierInclude_n_001.stdrfla	DN_OutlierInclude_n_001_stdrfla	distribution,outliers	3306	865	0.428084	0.000419841	0.428084
EN_Randomize_dyndist.sampen2_015hp	EN_Randomize_dyndist_sampen2_015hp	entropy,slow	2911	831	-0.428067	0.000419841	0.428067
SD_TSTL_surrogates_1_100_2_tc3.ksphereonmax	SD_TSTL_surrogates_1_100_2_tc3_ksphereonmax	nonlinear,tstool,correlation,surrogate	5815	951	0.427934	0.000737727	0.427934
MF_ARMA_orders_1_6_1_4.meanstd_aicsp	MF_ARMA_orders_1_6_1_4_meanstd_aicsp	model	7502	1033	-0.427882	0.000419841	0.427882
DN_RemovePoints_min_01.ac3diff	DN_RemovePoints_min_01_ac3diff	correlation,outliers	1735	757	0.427842	0.000419841	0.427842
CO_AddNoise_ac_quantiles_10.ami_at_5	CO_AddNoise_ac_quantiles_10_ami_at_5	correlation,AMI,entropy	1170	722	-0.42761	0.000419841	0.42761
SY_RangeEvolve.nuqp1	SY_RangeEvolve_nuqp1	stationarity	2216	494	0.427562	0.000737727	0.427562
NL_TSTL_dimensions_50_ac_fnnmar.scr_bc_m2_logrrange	NL_TSTL_dimensions_50_ac_fnnmar_scr_bc_m2_logrrange	nonlinear,tstool,scaling,dimension	5387	932	0.427299	0.000419841	0.427299
SY_LocalGlobal_p1.absmean	SY_LocalGlobal_absmean_p1	stationarity	765	502	0.427023	0.000419841	0.427023
SY_SlidingWindow_ac1_s2_2	SY_SlidingWindow_ac1_s2_2	stationarity	719	446	-0.426717	0.000419841	0.426717
MF_GP_FitAcross_covSEiso_covNoise_20.stdmu	MF_GP_FitAcross_covSEiso_covNoise_20_stdmu	model,GaussianProcess	6577	988	-0.426664	0.000419841	0.426664
CO_trev_mi.absnum	CO_trev_mi_absnum	correlation,nonlinear	1142	712	-0.426062	0.00106923	0.426062
CO_TranslateShape_circle_15_pts.statav2_m	CO_TranslateShape_circle_15_pts_statav2_m	correlation,stationarity	1789	762	-0.426025	0.000419841	0.426025
CO_tc3_ac.abs	CO_tc3_ac_abs	correlation,nonlinear	1110	706	0.425536	0.000737727	0.425536
PP_Compare_sin2.swss10_1	PP_Compare_sin2_swss10_1	preprocessing,raw,stationarity	5986	964	0.425424	0.000737727	0.425424
WL_DetailCoeffs_db3_max.max1on2_max	WL_DetailCoeffs_db3_max_max1on2_max	wavelet	6651	992	-0.425114	0.000419841	0.425114
SB_MotifThree_quantile.cbb	SB_MotifThree_quantile_cbb	symbolic,motifs	3627	881	0.42473	0.000737727	0.42473
AC_23	AC_23	correlation	115	114	0.424577	0.00106923	0.424577
CP_ML_StepDetect_l1pwc_02.meanerrstepint	CP_ML_StepDetect_l1pwc_02_meanerrstepint	stepdetection	7802	1054	0.424358	0.000419841	0.424358
PP_Compare_rav3.swss2_1	PP_Compare_rav3_swss2_1	preprocessing,raw,stationarity	6292	974	0.423967	0.00138651	0.423967
MF_GP_hyperparameters_covSEiso_covPeriodic_covNoise_1_200_first.logh2	MF_GP_hyperparameters_covSEiso_covPeriodic_covNoise_1_200_first_logh2	model,GaussianProcess	6495	983	0.42389	0.000419841	0.42389
MF_StateSpace_n4sid_1_05_1.c_1	MF_StateSpace_n4sid_1_05_1_c_1	model	7248	1025	0.42377	0.000419841	0.42377
DN_OutlierInclude_n_001.stdrfexpa	DN_OutlierInclude_n_001_stdrfexpa	distribution,outliers	3301	865	-0.423226	0.000419841	0.423226
SB_TransitionMatrix_4ac.maximeig	SB_TransitionMatrix_4ac_maximeig	symbolic,transitionmat	1426	737	0.423074	0.000419841	0.423074
DN_RemovePoints_max_01.kurtosisrat	DN_RemovePoints_max_01_kurtosisrat	correlation,outliers,distribution	1770	760	0.421764	0.000419841	0.421764
DN_OutlierInclude_p_001.mfexpr2	DN_OutlierInclude_p_001_mfexpr2	distribution,outliers	3252	864	0.421332	0.000419841	0.421332
SB_MotifThree_quantile.bccb	SB_MotifThree_quantile_bccb	symbolic,motifs	3685	881	0.421189	0.000419841	0.421189
PP_Compare_spline64.gauss1_kd_resAC2	PP_Compare_spline64_gauss1_kd_resAC2	preprocessing,raw	6084	967	-0.420813	0.000419841	0.420813
CO_Embed2_Dist_tau.d_ac3	CO_Embed2_Dist_tau_d_ac3	correlation,embedding	1956	769	-0.42059	0.000419841	0.42059
PP_Compare_diff1.statav2	PP_Compare_diff1_statav2	preprocessing,raw,stationarity	6097	968	-0.42043	0.000419841	0.42043
DN_Moments_3	DN_Moments_3	distribution,moment,shape	23	22	-0.420402	0.000419841	0.420402
CO_trev_mi.abs	CO_trev_mi_abs	correlation,nonlinear	1140	712	-0.42024	0.00138651	0.42024
SY_SlidingWindow_mom4_s2_10	SY_SlidingWindow_mom4_s2_10	stationarity	674	401	-0.419565	0.000419841	0.419565
MF_GP_FitAcross_covSEiso_covNoise_20.logh3	MF_GP_FitAcross_covSEiso_covNoise_20_logh3	model,GaussianProcess	6583	988	0.419188	0.000419841	0.419188
PP_Compare_spline64.olbt_s2	PP_Compare_spline64_olbt_s2	preprocessing,raw	6095	967	-0.418992	0.000419841	0.418992
SB_MotifThree_diffquant.aaca	SB_MotifThree_diffquant_aaca	symbolic,motifs	3759	882	0.418955	0.000419841	0.418955
PP_Compare_spline24.swms5_2	PP_Compare_spline24_swms5_2	preprocessing,raw,stationarity	6011	965	0.418607	0.000419841	0.418607
PP_Compare_spline44.swms10_1	PP_Compare_spline44_swms10_1	preprocessing,raw,stationarity	6043	966	0.418235	0.000419841	0.418235
PP_Compare_spline44.statav2	PP_Compare_spline44_statav2	preprocessing,raw,stationarity	6035	966	0.418102	0.000419841	0.418102
PH_Walker_biasprop_05_01.res_swss5_1	PH_Walker_biasprop_05_01_swss5_1	trend,stationarity	2616	815	-0.417979	0.000419841	0.417979
NL_MS_nlpe_3_ac.normp	NL_MS_nlpe_3_ac_normp	nonlinear,prediction,model	6881	1005	0.417978	0.000419841	0.417978
NL_TSTL_dimensions_50_ac_fnnmar.scr_bc_mopt_meanabsres	NL_TSTL_dimensions_50_ac_fnnmar_scr_bc_mopt_meanabsres	nonlinear,tstool,scaling,dimension	5407	932	-0.417901	0.000419841	0.417901
PH_ForcePotential_sine_10_004_10.ac1	PH_ForcePotential_sine_10_004_10_ac1	dynamicalSystem	1670	751	0.417549	0.000419841	0.417549
WL_coeffs_db3_max.wb1m	WL_coeffs_db3_max_wb1m	wavelet	6715	998	0.417469	0.000419841	0.417469
CO_AutoCorrShape_drown.actau	CO_AutoCorrShape_drown_actau	correlation	1521	741	0.417077	0.000419841	0.417077
SB_TransitionMatrix_4ac.TD1	SB_TransitionMatrix_4ac_TD1	symbolic,transitionmat	1414	737	-0.416777	0.000419841	0.416777
NL_TSTL_acp_mi_1__10.sacpf_4	NL_TSTL_acp_mi_1__10_sacpf_4	nonlinear,correlation	5104	924	-0.416581	0.000419841	0.416581
SY_SlidingWindow_ent_s2_10	SY_SlidingWindow_ent_s2_10	stationarity	606	333	-0.416085	0.000419841	0.416085
SY_SlidingWindow_ac1_ent2_2	SY_SlidingWindow_ac1_ent2_2	stationarity	733	460	-0.415309	0.000419841	0.415309
PP_Compare_sin1.swms2_2	PP_Compare_sin1_swms2_2	preprocessing,raw,stationarity	5947	963	-0.415001	0.000419841	0.415001
FC_Surprise_T2_100_4_q_500.tstat	FC_Surprise_T2_100_4_q_500_tstat	information,symbolic	2327	786	0.41491	0.000737727	0.41491
MF_GP_FitAcross_covSEiso_covNoise_20.stdS	MF_GP_FitAcross_covSEiso_covNoise_20_stdS	model,GaussianProcess	6579	988	0.414785	0.000419841	0.414785
PP_Compare_spline24.swms5_1	PP_Compare_spline24_swms5_1	preprocessing,raw,stationarity	6010	965	0.414735	0.000419841	0.414735
MF_GP_FitAcross_covSEiso_covNoise_20.mlikelihood	MF_GP_FitAcross_covSEiso_covNoise_20_mlikelihood	model,GaussianProcess	6580	988	-0.414554	0.000419841	0.414554
SY_LocalGlobal_l100.kurtosis	SY_LocalGlobal_kurtosis_l100	stationarity	831	498	-0.414529	0.000419841	0.414529
EX_MovingThreshold_01_002.iqrq	EX_MovingThreshold_01_002_iqrq	outliers	3433	872	-0.414469	0.000419841	0.414469
PP_Compare_sin2.swss2_2	PP_Compare_sin2_swss2_2	preprocessing,raw,stationarity	5983	964	0.414337	0.00106923	0.414337
SP_Summaries_pgram_hamm.fpolysat_r2	SP_Summaries_pgram_hamm_fpolysat_r2	spectral	4312	908	-0.414033	0.000419841	0.414033
WL_coeffs_db3_5.wb75m	WL_coeffs_db3_5_wb75m	wavelet	6701	997	0.41397	0.000419841	0.41397
MF_armax_2_2_05_1.normp	MF_armax_2_2_05_1_normp	model	7496	1032	0.413709	0.000419841	0.413709
PP_Compare_spline64.swms2_2	PP_Compare_spline64_swms2_2	preprocessing,raw,stationarity	6071	967	0.41362	0.000419841	0.41362
CO_Embed2_Basic_tau.ring1_05	CO_Embed2_Basic_tau_ring1_05	correlation	1575	743	-0.41319	0.000419841	0.41319
NL_MS_nlpe_3_ac.minfpe	NL_MS_nlpe_3_ac_minfpe	nonlinear,prediction,model	6878	1005	-0.413171	0.000419841	0.413171
PP_Compare_diff2.swss2_1	PP_Compare_diff2_swss2_1	preprocessing,raw,stationarity	6137	969	0.412768	0.00295429	0.412768
PP_Compare_medianf10.swss2_1	PP_Compare_medianf10_swss2_1	preprocessing,raw,stationarity	6230	972	0.412201	0.00202739	0.412201
MF_armax_2_2_05_1.normksstat	MF_armax_2_2_05_1_normksstat	model	7495	1032	-0.412138	0.000419841	0.412138
AC_9	AC_9	correlation	101	100	0.411901	0.000737727	0.411901
FC_LocalSimple_mean4.meanerr	FC_LocalSimple_mean4_meanerr	forecasting	3018	836	0.411875	0.000419841	0.411875
EN_Randomize_dyndist.d1fexpr2	EN_Randomize_dyndist_d1fexpr2	entropy,slow	2878	831	0.411643	0.000419841	0.411643
DN_SimpleFit_exp1_ks.r2	DN_SimpleFit_exp1_r2_ks	distribution,gof,exp1	3158	851	-0.41159	0.00106923	0.41159
PP_Compare_rav4.swss2_1	PP_Compare_rav4_swss2_1	preprocessing,raw,stationarity	6323	975	0.411037	0.00202739	0.411037
PH_Walker_prop_09.res_swss5_1	PH_Walker_prop_09_swss5_1	trend,stationarity	2576	813	-0.41074	0.000737727	0.41074
CO_AutoCorrShape_drown.Nac	CO_AutoCorrShape_drown_Nac	correlation	1513	741	0.410539	0.000737727	0.410539
DN_OutlierTest5.mean	DN_OutlierTest5_mean	spread,distribution,outliers	1043	648	0.410412	0.000419841	0.410412
SB_MotifThree_diffquant.caba	SB_MotifThree_diffquant_caba	symbolic,motifs	3810	882	0.410111	0.000419841	0.410111
SD_SurrogateTest_RP_99.tc3_zscore	SD_SurrogateTest_RP_99_tc3_zscore	surrogate,nonlinearity	7854	1062	-0.41011	0.000419841	0.41011
PP_Compare_spline64.kscn_peaksepy	PP_Compare_spline64_kscn_peaksepy	preprocessing,raw	6087	967	-0.409954	0.000419841	0.409954
MF_CompareTestSets_y_ar_4_rand_25_01_1.mabserr_std	MF_CompareTestSets_y_ar_4_rand_25_01_1_mabserr_std	model,prediction,stationarity	7164	1020	-0.409579	0.000419841	0.409579
NL_TSTL_dimensions_50_ac_fnnmar.scr_bc_mopt_scaling_exp	NL_TSTL_dimensions_50_ac_fnnmar_scr_bc_mopt_scaling_exp	nonlinear,tstool,scaling,dimension	5409	932	-0.409533	0.000419841	0.409533
PP_Compare_medianf3.htdt_ksn	PP_Compare_medianf3_htdt_ksn	preprocessing,raw	6185	970	0.409397	0.00233709	0.409397
PP_Compare_poly1.swms2_2	PP_Compare_poly1_swms2_2	preprocessing,raw,stationarity	5885	961	-0.409306	0.000419841	0.409306
WL_coeffs_db3_max.med_coeff	WL_coeffs_db3_max_med_coeff	wavelet	6708	998	0.408981	0.000737727	0.408981
CO_TranslateShape_rectangle_2_pts.mode	CO_TranslateShape_rectangle_2_pts_mode	correlation	1833	765	0.408773	0.000419841	0.408773
TSTL_localdensity_5_40_1_3.rangeden	TSTL_localdensity_5_40_1_3_rangeden	nonlinear,tstool	5531	940	-0.408616	0.000419841	0.408616
DN_OutlierInclude_n_001.mfexpr2	DN_OutlierInclude_n_001_mfexpr2	distribution,outliers	3283	865	0.40764	0.000419841	0.40764
WL_coeffs_db3_3.wb90m	WL_coeffs_db3_3_wb90m	wavelet	6680	995	0.406962	0.000419841	0.406962
ST_LocalExtrema_l50.maxabsext	ST_LocalExtrema_l50_maxabsext	distribution,stationarity	3331	866	-0.406425	0.000419841	0.406425
ST_MomentCorr_002_02_mean_std_none.R	ST_MomentCorr_002_02_mean_std_none_R	statistics	7814	1056	-0.40584	0.000419841	0.40584
DN_SimpleFit_exp1_hsqrt.resAC1	DN_SimpleFit_exp1_AC1_hsqrt	distribution,gof,exp1	3165	852	-0.405623	0.000419841	0.405623
PP_Compare_spline24.kscn_relent	PP_Compare_spline24_kscn_relent	preprocessing,raw	6028	965	-0.405437	0.000419841	0.405437
CO_TranslateShape_rectangle_2_pts.statav3_s	CO_TranslateShape_rectangle_2_pts_statav3_s	correlation,stationarity	1842	765	-0.405401	0.000419841	0.405401
EN_Randomize_dyndist.xc1fexprmse	EN_Randomize_dyndist_xc1fexprmse	entropy,slow	2872	831	-0.405346	0.000419841	0.405346
NL_TSTL_acp_mi_1__10.iqracpf_4	NL_TSTL_acp_mi_1__10_iqracpf_4	nonlinear,correlation	5105	924	-0.404907	0.000737727	0.404907
NL_MS_nlpe_3_ac.p4_5	NL_MS_nlpe_3_ac_p4_5	nonlinear,prediction,model	6864	1005	0.404807	0.000737727	0.404807
SB_TransitionpAlphabet_20_ac.trcovfexp_r2	SB_TransitionpAlphabet_20_ac_trcovfexp_r2	symbolic,transitionmat	1499	740	-0.40434	0.000419841	0.40434
MF_AR_arcov_5.res_AC2	MF_AR_arcov_5_res_AC2	model,gof	3872	887	0.404217	0.000419841	0.404217
SY_SlidingWindow_lil_ent5_2	SY_SlidingWindow_lil_ent5_2	stationarity	713	440	0.404037	0.00233709	0.404037
ST_LocalExtrema_n25.maxabsext	ST_LocalExtrema_n25_maxabsext	distribution,stationarity	3375	868	-0.403961	0.000419841	0.403961
DK_TheilerQ	DK_TheilerQ	misc	1052	655	-0.403914	0.000419841	0.403914
NL_TSTL_LargestLyap_n1_01_001_3_mi_fnnmar.maxp	NL_TSTL_LargestLyap_n1_01_001_3_mi_fnnmar_maxp	nonlinear,tstool	5690	944	-0.403842	0.000737727	0.403842
CO_AddNoise_ac_gaussian.fitexpb	CO_AddNoise_ac_gaussian_fitexpb	correlation,AMI,entropy	1288	728	0.403617	0.000419841	0.403617
SY_SlidingWindow_mom4_ent2_10	SY_SlidingWindow_mom4_ent2_10	stationarity	688	415	-0.4036	0.000737727	0.4036
SY_LocalGlobal_p5.median	SY_LocalGlobal_median_p5	stationarity	794	503	0.403191	0.000419841	0.403191
EN_Randomize_dyndist.xcn1fexprmse	EN_Randomize_dyndist_xcn1fexprmse	entropy,slow	2866	831	-0.40293	0.000419841	0.40293
SD_TSTL_surrogates_1_100_2_tc3.meansurr	SD_TSTL_surrogates_1_100_2_tc3_meansurr	nonlinear,tstool,correlation,surrogate	5813	951	-0.402543	0.000419841	0.402543
MF_StateSpace_n4sid_2_05_1.normp	MF_StateSpace_n4sid_2_05_1_normp	model	7315	1026	0.402521	0.000419841	0.402521
MD_hrv_classic.lfhf	MD_hrv_classic_lfhf	medical	7759	1051	0.402479	0.000737727	0.402479
SD_TSTL_surrogates_mi_100_3_trev.ksiqrsfrommode	SD_TSTL_surrogates_mi_100_3_trev_ksiqrsfrommode	nonlinear,tstool,correlation,surrogate	5879	960	-0.402339	0.0017056	0.402339
PH_Walker_prop_01.res_swss5_1	PH_Walker_prop_01_swss5_1	trend,stationarity	2536	811	-0.402037	0.000737727	0.402037
EN_mse_1-10_2_015.sampen_s5	EN_mse_1-10_2_015_sampen_s5	entropy,sampen,mse	2750	827	0.401995	0.000419841	0.401995
NL_TSTL_acp_mi_1__10.macpf_5	NL_TSTL_acp_mi_1__10_macpf_5	nonlinear,correlation	5107	924	-0.401531	0.000419841	0.401531
MF_StateSpace_n4sid_2_05_1.normksstat	MF_StateSpace_n4sid_2_05_1_normksstat	model	7314	1026	-0.400432	0.000419841	0.400432
PP_Compare_poly2.statav10	PP_Compare_poly2_statav10	preprocessing,raw,stationarity	5915	962	0.399774	0.000419841	0.399774
CO_AddNoise_ac_kraskov1_4.meanch	CO_AddNoise_ac_kraskov1_4_meanch	correlation,AMI,entropy	1315	730	0.399728	0.000737727	0.399728
SY_SlidingWindow_ent_sampen10_10	SY_SlidingWindow_ent_sampen10_10	stationarity	616	343	0.399511	0.000419841	0.399511
CO_Embed2_tau.eucds3	CO_Embed2_tau_eucds3	correlation,embedding	1930	767	-0.399397	0.000419841	0.399397
PP_Compare_diff2.kscn_peaksepy	PP_Compare_diff2_kscn_peaksepy	preprocessing,raw	6149	969	0.399186	0.000737727	0.399186
MF_armax_1_1_05_1.normp	MF_armax_1_1_05_1_normp	model	7461	1031	0.399064	0.000419841	0.399064
PP_Compare_spline44.statav8	PP_Compare_spline44_statav8	preprocessing,raw,stationarity	6038	966	0.399023	0.000419841	0.399023
MF_StateSpace_n4sid_3_05_1.p2_5	MF_StateSpace_n4sid_3_05_1_p2_5	model	7341	1027	0.398969	0.000419841	0.398969
MF_GP_FitAcross_covSEiso_covNoise_20.meanS	MF_GP_FitAcross_covSEiso_covNoise_20_meanS	model,GaussianProcess	6578	988	0.398672	0.000419841	0.398672
SD_TSTL_surrogates_mi_100_3_trev.iqrsfrommedian	SD_TSTL_surrogates_mi_100_3_trev_iqrsfrommedian	nonlinear,tstool,correlation,surrogate	5874	960	-0.398471	0.0017056	0.398471
SY_LocalGlobal_p1.kurtosis	SY_LocalGlobal_kurtosis_p1	stationarity	835	502	-0.398138	0.000419841	0.398138
SY_SlidingWindow_s_s2_2	SY_SlidingWindow_s_s2_2	stationarity	582	309	-0.398115	0.000737727	0.398115
NL_TSTL_dimensions_50_ac_fnnmar.scr_bc_m3_meanabsres	NL_TSTL_dimensions_50_ac_fnnmar_scr_bc_m3_meanabsres	nonlinear,tstool,scaling,dimension	5398	932	-0.397743	0.000419841	0.397743
PP_Compare_spline24.swss5_2	PP_Compare_spline24_swss5_2	preprocessing,raw,stationarity	6016	965	-0.397674	0.000419841	0.397674
MF_armax_1_1_05_1.normksstat	MF_armax_1_1_05_1_normksstat	model	7460	1031	-0.397285	0.000419841	0.397285
DN_OutlierTest10.mean	DN_OutlierTest10_mean	spread,distribution,outliers	1045	649	0.39716	0.000419841	0.39716
SY_SlidingWindow_sampen_s5_10	SY_SlidingWindow_sampen_s5_10	stationarity	631	358	-0.396903	0.000419841	0.396903
FC_Surprise_T2_100_tau_m2quad_500.mean	FC_Surprise_T2_100_tau_m2quad_500_mean	information,symbolic	2512	810	-0.396865	0.000737727	0.396865
AC_24	AC_24	correlation	116	115	0.396708	0.0026422	0.396708
IN_AutoMutualInfoStats_40_gaussian.amiac1	IN_AutoMutualInfoStats_40_gaussian_amiac1	information,correlation,AMI	321	713	0.396704	0.000419841	0.396704
MF_StateSpace_n4sid_1_05_1.normp	MF_StateSpace_n4sid_1_05_1_normp	model	7277	1025	0.396033	0.000419841	0.396033
NL_TSTL_dimensions_50_ac_fnnmar.bc_minscalingexp	NL_TSTL_dimensions_50_ac_fnnmar_bc_minscalingexp	nonlinear,tstool,scaling,dimension	5447	932	-0.395681	0.000419841	0.395681
PP_Compare_rav10.swss2_1	PP_Compare_rav10_swss2_1	preprocessing,raw,stationarity	6354	976	0.395581	0.00324615	0.395581
CO_Embed2_Basic_1.parabdown01_1	CO_Embed2_Basic_1_parabdown01_1	correlation	1538	742	0.395474	0.00202739	0.395474
FC_LoopLocalSimple_mean.sws_fexp_c	FC_LoopLocalSimple_mean_sws_fexp_c	forecasting	3047	838	-0.395323	0.00106923	0.395323
CO_AddNoise_ac_std1_10.fitexpr2	CO_AddNoise_ac_std1_10_fitexpr2	correlation,AMI,entropy	1252	726	-0.39532	0.000419841	0.39532
PP_Compare_resample_2_1.statav8	PP_Compare_resample_2_1_statav8	preprocessing,raw,stationarity	6410	978	-0.395231	0.000737727	0.395231
PP_Compare_spline44.statav10	PP_Compare_spline44_statav10	preprocessing,raw,stationarity	6039	966	0.39521	0.000419841	0.39521
NL_TSTL_dimensions_50_ac_fnnmar.bc_lfitm3	NL_TSTL_dimensions_50_ac_fnnmar_bc_lfitm3	nonlinear,tstool,scaling,dimension	5343	932	-0.395202	0.000737727	0.395202
MF_StateSpace_n4sid_1_05_1.normksstat	MF_StateSpace_n4sid_1_05_1_normksstat	model	7276	1025	-0.394843	0.000737727	0.394843
NL_TISEAN_fnn_1_10_005.firstunder03	NL_TISEAN_fnn_1_10_005_firstunder03	nonlinear,dimension,tisean	4896	917	0.394646	0.000419841	0.394646
SY_LocalGlobal_l100.absmean	SY_LocalGlobal_absmean_l100	stationarity	761	498	0.394497	0.000737727	0.394497
PP_Compare_spline64.swss10_2	PP_Compare_spline64_swss10_2	preprocessing,raw,stationarity	6080	967	-0.394476	0.000419841	0.394476
SY_RangeEvolve.nuql10	SY_RangeEvolve_nuql10	stationarity	2220	494	0.394024	0.000737727	0.394024
MF_GP_hyperparameters_covSEiso_covNoise_1_200_first.logh2	MF_GP_hyperparameters_covSEiso_covNoise_1_200_first_logh2	model,GaussianProcess	6484	982	0.393958	0.000737727	0.393958
CO_AddNoise_ac_kraskov1_4.firstUnder25	CO_AddNoise_ac_kraskov1_4_firstUnder25	correlation,AMI,entropy	1320	730	-0.393885	0.000737727	0.393885
EN_Randomize_dyndist.d1fexpc	EN_Randomize_dyndist_d1fexpc	entropy,slow,lengthdep	2877	831	-0.393694	0.000419841	0.393694
SY_SlidingWindow_lil_ent10_2	SY_SlidingWindow_lil_ent10_2	stationarity	716	443	0.393623	0.000737727	0.393623
SY_LocalGlobal_l500.median	SY_LocalGlobal_median_l500	stationarity	790	499	0.393581	0.000419841	0.393581
SB_TransitionMatrix_3ac.T1	SB_TransitionMatrix_3ac_T1	symbolic,transitionmat	1393	736	-0.393574	0.000419841	0.393574
DN_Moments_raw_3	DN_Moments_raw_3	distribution,moment,shape,raw,spreaddep	32	31	-0.393539	0.000419841	0.393539
MF_StateSpace_n4sid_3_05_1.normp	MF_StateSpace_n4sid_3_05_1_normp	model	7360	1027	0.393528	0.000419841	0.393528
PP_Compare_diff1.statav4	PP_Compare_diff1_statav4	preprocessing,raw,stationarity	6098	968	-0.393266	0.000419841	0.393266
CO_AddNoise_ac_kraskov1_4.fitlinb	CO_AddNoise_ac_kraskov1_4_fitlinb	correlation,AMI,entropy	1330	730	-0.393263	0.00106923	0.393263
DN_HighLowMu	HighLowMu	distribution,raw,locdep,spreaddep	86	85	-0.393158	0.000419841	0.393158
IN_AutoMutualInfoStats_diff_20_gaussian.ami11	IN_AutoMutualInfoStats_diff_20_gaussian_ami11	information,correlation,AMI	387	715	-0.393095	0.000737727	0.393095
MF_StateSpace_n4sid_3_05_1.normksstat	MF_StateSpace_n4sid_3_05_1_normksstat	model	7359	1027	-0.393083	0.000419841	0.393083
SC_FluctAnal_2_dfa_50_1_3_logi.prop_r1	SC_FluctAnal_2_dfa_50_1_3_logi_prop_r1	scaling	4180	904	0.392669	0.00504878	0.392669
SP_Summaries_welch_rect.fpolysat_r2	SP_Summaries_welch_rect_fpolysat_r2	spectral	4436	909	-0.392592	0.000419841	0.392592
SP_Summaries_fft.fpolysat_r2	SP_Summaries_fft_fpolysat_r2	spectral	4560	910	-0.39259	0.000419841	0.39259
SY_LocalGlobal_unicg100.median	SY_LocalGlobal_median_unicg100	stationarity	798	507	0.392294	0.000419841	0.392294
SB_MotifTwo_mean.u	SB_MotifTwo_mean_u	symbolic,motifs	3532	879	0.392285	0.000419841	0.392285
SC_FluctAnal_2_dfa_50_1_3_logi.logtausplit	SC_FluctAnal_2_dfa_50_1_3_logi_logtausplit	scaling	4179	904	0.391848	0.00504878	0.391848
DN_OutlierInclude_n_001.mfexpb	DN_OutlierInclude_n_001_mfexpb	distribution,outliers	3281	865	0.391762	0.000419841	0.391762
WL_coeffs_db3_max.mean_coeff	WL_coeffs_db3_max_mean_coeff	wavelet	6706	998	0.391136	0.000737727	0.391136
MF_AR_arcov_2.a3	MF_AR_arcov_2_a3	model,fit	3840	884	-0.391004	0.000737727	0.391004
PP_Compare_medianf10.kscn_olapint	PP_Compare_medianf10_kscn_olapint	preprocessing,raw	6244	972	0.390658	0.0026422	0.390658
CO_AddNoise_ac_quantiles_10.fitexpa	CO_AddNoise_ac_quantiles_10_fitexpa	correlation,AMI,entropy	1174	722	-0.390415	0.00138651	0.390415
SY_LocalGlobal_unicg50.ac1	SY_LocalGlobal_AC1_unicg50	stationarity	853	506	-0.390409	0.000419841	0.390409
NW_VisibilityGraph_horiz.dexpk_rmse	NW_VisibilityGraph_horiz_dexpk_rmse	network,visibilityGraph	2012	772	-0.390361	0.000419841	0.390361
PP_Compare_spline44.swss5_1	PP_Compare_spline44_swss5_1	preprocessing,raw,stationarity	6046	966	-0.389836	0.000419841	0.389836
PP_Compare_resample_2_1.statav10	PP_Compare_resample_2_1_statav10	preprocessing,raw,stationarity	6411	978	-0.389605	0.000737727	0.389605
PH_ForcePotential_sine_10_004_10.median	PH_ForcePotential_sine_10_004_10_median	dynamicalSystem	1666	751	0.389586	0.000419841	0.389586
PH_ForcePotential_sine_3_05_1.ac10	PH_ForcePotential_sine_3_05_1_ac10	dynamicalSystem	1649	749	0.389581	0.000419841	0.389581
PP_Compare_spline24.statav8	PP_Compare_spline24_statav8	preprocessing,raw,stationarity	6007	965	0.389477	0.000419841	0.389477
EX_MovingThreshold_1_002.maxq	EX_MovingThreshold_1_002_maxq	outliers	3456	874	-0.389404	0.000419841	0.389404
PH_Walker_prop_11.w_median	PH_Walker_prop_11_w_median	trend	2579	814	0.389234	0.000419841	0.389234
PP_Compare_rav2.swms10_1	PP_Compare_rav2_swms10_1	preprocessing,raw,stationarity	6260	973	-0.389208	0.000737727	0.389208
DN_RemovePoints_min_08.ac3diff	DN_RemovePoints_min_08_ac3diff	correlation,outliers	1755	759	0.389033	0.000737727	0.389033
MF_FitSubsegments_ar_2_uniform_25_01.a_2_min	MF_FitSubsegments_ar_2_uniform_25_01_a_2_min	model,prediction	7131	1017	-0.389017	0.000737727	0.389017
CO_AddNoise_ac_std1_10.pdec	CO_AddNoise_ac_std1_10_pdec	correlation,AMI,entropy	1239	726	-0.388979	0.000419841	0.388979
MF_armax_3_1_05_1.normp	MF_armax_3_1_05_1_normp	model	7428	1030	0.388542	0.000419841	0.388542
PP_Compare_spline64.kscn_olapint	PP_Compare_spline64_kscn_olapint	preprocessing,raw	6089	967	0.388287	0.000419841	0.388287
PP_Compare_sin2.swms10_1	PP_Compare_sin2_swms10_1	preprocessing,raw,stationarity	5981	964	-0.388271	0.000737727	0.388271
EN_SampEn_5_02.sampen5	EN_SampEn_5_02_sampen5	entropy,sampen	2724	823	0.388248	0.000419841	0.388248
MF_armax_3_1_05_1.normksstat	MF_armax_3_1_05_1_normksstat	model	7427	1030	-0.388084	0.000419841	0.388084
MF_ExpSmoothing_05_best.p1_1	MF_ExpSmoothing_05_best_p1_1	model	7505	1034	0.387857	0.000419841	0.387857
ST_LocalExtrema_l100.maxmaxmed	ST_LocalExtrema_l100_maxmaxmed	distribution,stationarity	3351	867	-0.387671	0.000419841	0.387671
FC_Surprise_dist_50_3_udq_500.max	FC_Surprise_dist_50_3_udq_500_max	information,symbolic	2353	790	-0.387464	0.000419841	0.387464
PP_Compare_spline44.swms5_1	PP_Compare_spline44_swms5_1	preprocessing,raw,stationarity	6041	966	0.386844	0.000419841	0.386844
MF_ARMA_orders_1_6_1_4.std_all_aics	MF_ARMA_orders_1_6_1_4_std_all_aics	model	7500	1033	-0.386726	0.000419841	0.386726
DN_FitKernelSmoothraw.asym	DN_FitKernelSmoothraw_asym	distribution,ksdensity,symmetry,raw	934	570	0.386494	0.000419841	0.386494
SY_LocalGlobal_p1.ac1	SY_LocalGlobal_AC1_p1	stationarity	849	502	-0.386444	0.000419841	0.386444
PP_Compare_spline64.statav8	PP_Compare_spline64_statav8	preprocessing,raw,stationarity	6069	967	0.38598	0.000419841	0.38598
CO_AddNoise_ac_quantiles_10.fitlinb	CO_AddNoise_ac_quantiles_10_fitlinb	correlation,AMI,entropy	1179	722	-0.385881	0.00202739	0.385881
SY_SlidingWindow_lil_ent5_10	SY_SlidingWindow_lil_ent5_10	stationarity	714	441	0.385697	0.00138651	0.385697
DN_OutlierInclude_abs_001.mdrstd	DN_OutlierInclude_abs_001_mdrstd	distribution,outliers	3234	863	-0.385579	0.00138651	0.385579
DN_Quantile_50	quantile_50	distribution	72	69	0.385552	0.000419841	0.385552
SY_LocalGlobal_unicg500.median	SY_LocalGlobal_median_unicg500	stationarity	799	508	0.385325	0.000419841	0.385325
CO_AddNoise_ac_even_10.ami_at_5	CO_AddNoise_ac_even_10_ami_at_5	correlation,AMI,entropy	1208	724	-0.385324	0.0017056	0.385324
DN_RemovePoints_absclose_05.median	DN_RemovePoints_absclose_05_median	correlation,outliers	1694	753	0.38521	0.000419841	0.38521
SY_LocalGlobal_p1.median	SY_LocalGlobal_median_p1	stationarity	793	502	0.385091	0.000737727	0.385091
DN_Moments_raw_5	DN_Moments_raw_5	distribution,moment,shape,raw,spreaddep	34	33	-0.385062	0.000419841	0.385062
SC_FluctAnal_2_dfa_50_1_logi.alpha	SC_FluctAnal_2_dfa_50_1_logi_alpha	scaling	4078	900	0.385047	0.000737727	0.385047
SY_SlidingWindow_s_ent2_2	SY_SlidingWindow_s_ent2_2	stationarity	596	323	-0.385004	0.0026422	0.385004
PP_Compare_sin2.statav8	PP_Compare_sin2_statav8	preprocessing,raw,stationarity	5976	964	-0.384605	0.000737727	0.384605
DN_RemovePoints_absclose_01.median	DN_RemovePoints_absclose_01_median	correlation,outliers	1683	752	0.384467	0.000419841	0.384467
SB_TransitionMatrix_2ac.T2	SB_TransitionMatrix_2ac_T2	symbolic,transitionmat	1384	735	0.384151	0.000419841	0.384151
SC_FluctAnal_2_nothing_50_logi.ssr	SC_FluctAnal_2_nothing_50_logi_ssr	scaling	3889	892	-0.383977	0.000419841	0.383977
WL_DetailCoeffs_db3_max.std_mean	WL_DetailCoeffs_db3_max_std_mean	wavelet	6643	992	-0.383826	0.000737727	0.383826
CO_AddNoise_ac_kraskov1_4.firstUnder50	CO_AddNoise_ac_kraskov1_4_firstUnder50	correlation,AMI,entropy	1319	730	-0.383781	0.00138651	0.383781
NL_TISEAN_fnn_1_10_005.nHood2_1	NL_TISEAN_fnn_1_10_005_nHood2_1	nonlinear,dimension,tisean	4875	917	-0.383763	0.000419841	0.383763
CO_AddNoise_ac_even_10.pdec	CO_AddNoise_ac_even_10_pdec	correlation,AMI,entropy	1201	724	-0.383643	0.00138651	0.383643
EN_DistributionEntropy_hist_50_0	EN_DistributionEntropy_hist_50_0	entropy	893	534	0.38348	0.0017056	0.38348
SC_FluctAnal_2_rsrange_50_logi.linfitint	SC_FluctAnal_2_rsrange_50_logi_linfitint	scaling	4005	897	-0.383307	0.000737727	0.383307
FC_LocalSimple_mean1.sws	FC_LocalSimple_mean1_sws	forecasting	2991	833	-0.382964	0.00233709	0.382964
CO_AddNoise_ac_kraskov1_4.ami_at_5	CO_AddNoise_ac_kraskov1_4_ami_at_5	correlation,AMI,entropy	1321	730	-0.382724	0.000419841	0.382724
PP_Compare_spline64.olbt_s5	PP_Compare_spline64_olbt_s5	preprocessing,raw	6096	967	-0.382632	0.000419841	0.382632
PP_Compare_medianf4.swms10_1	PP_Compare_medianf4_swms10_1	preprocessing,raw,stationarity	6198	971	-0.382542	0.000737727	0.382542
FC_LocalSimple_meantau.gofr2	FC_LocalSimple_meantau_gofr2	forecasting	3033	837	0.382334	0.00106923	0.382334
MF_AR_arcov_5.res_AC1	MF_AR_arcov_5_res_AC1	model,gof	3871	887	0.382316	0.00295429	0.382316
SY_SlidingWindow_mom4_s5_1	SY_SlidingWindow_mom4_s5_1	stationarity	675	402	-0.382268	0.00106923	0.382268
TSTL_localdensity_5_40_ac_fnnmar.ac5den	TSTL_localdensity_5_40_ac_fnnmar_ac5den	nonlinear,tstool	5511	938	-0.381876	0.000737727	0.381876
SY_SpreadRandomLocal_ac5_100.meantaul	SY_SpreadRandomLocal_ac5_100_meantaul	stationarity	2102	477	0.381452	0.000737727	0.381452
SY_KPSStest_1.stat	SY_KPSStest_1_stat	stationarity,hypothesistest	7708	1045	0.38145	0.000737727	0.38145
SY_LocalGlobal_p1.iqr	SY_LocalGlobal_iqr_p1	stationarity	807	502	-0.381414	0.00138651	0.381414
NL_TSTL_TakensEstimator_n1_005_005_mi_fnnmar	NL_TSTL_TakensEstimator_n1_005_005_mi_fnnmar	nonlinear,tstool,crptool,scaling,dimension	1024	644	-0.380675	0.00138651	0.380675
PP_Compare_resample_1_2.swms10_1	PP_Compare_resample_1_2_swms10_1	preprocessing,raw,stationarity	6384	977	-0.380609	0.000737727	0.380609
SB_BinaryStats_mean.pupstat2	SB_BinaryStats_mean_pupstat2	distribution,stationarity	3476	876	-0.379799	0.000419841	0.379799
MD_rawHRVmeas.trisqrt	MD_rawHRVmeas_trisqrt	medical,raw	7871	1064	0.379739	0.000419841	0.379739
PP_Compare_resample_1_2.swss2_2	PP_Compare_resample_1_2_swss2_2	preprocessing,raw,stationarity	6386	977	0.37967	0.00233709	0.37967
PP_Compare_rav2.kscn_olapint	PP_Compare_rav2_kscn_olapint	preprocessing,raw	6275	973	0.379646	0.0017056	0.379646
PH_Walker_prop_09.w_median	PH_Walker_prop_09_w_median	trend	2559	813	0.379579	0.000419841	0.379579
PP_Compare_medianf10.swms10_1	PP_Compare_medianf10_swms10_1	preprocessing,raw,stationarity	6229	972	-0.379433	0.000737727	0.379433
NL_TSTL_acp_mi_1__10.mmacpfdiff	NL_TSTL_acp_mi_1__10_mmacpfdiff	nonlinear,correlation	5079	924	-0.379376	0.00106923	0.379376
PP_Compare_rav10.gauss1_kd_rmse	PP_Compare_rav10_gauss1_kd_rmse	preprocessing,raw	6361	976	-0.379329	0.000419841	0.379329
NL_TSTL_dimensions_50_ac_fnnmar.scr_co_m3_scaling_exp	NL_TSTL_dimensions_50_ac_fnnmar_scr_co_m3_scaling_exp	nonlinear,tstool,scaling,dimension	5436	932	0.379225	0.00202739	0.379225
NL_TSTL_dimensions_50_ac_fnnmar.scr_co_m2_minbad	NL_TSTL_dimensions_50_ac_fnnmar_scr_co_m2_minbad	nonlinear,tstool,scaling,dimension	5420	932	0.379166	0.000737727	0.379166
SY_SlidingWindow_ac1_s5_1	SY_SlidingWindow_ac1_s5_1	stationarity	721	448	-0.379164	0.00138651	0.379164
PP_Compare_spline64.gauss1_kd_r2	PP_Compare_spline64_gauss1_kd_r2	preprocessing,raw	6081	967	0.378914	0.000419841	0.378914
PH_Walker_runningvar_15_50.sw_minrat	PH_Walker_runningvar_15_50_sw_minrat	trend	2690	819	0.378639	0.000419841	0.378639
ST_MomentCorr_002_02_mean_std_none.absR	ST_MomentCorr_002_02_mean_std_none_absR	statistics	7815	1056	-0.378571	0.0026422	0.378571
EN_Randomize_statdist.xcn1fexprmse	EN_Randomize_statdist_xcn1fexprmse	entropy,slow	2803	830	-0.378133	0.000419841	0.378133
PP_Compare_medianf4.kscn_olapint	PP_Compare_medianf4_kscn_olapint	preprocessing,raw	6213	971	0.378002	0.00295429	0.378002
PP_Compare_resample_2_1.statav6	PP_Compare_resample_2_1_statav6	preprocessing,raw,stationarity	6409	978	-0.377687	0.000737727	0.377687
DN_RemovePoints_absfar_01.mean	DN_RemovePoints_absfar_01_mean	correlation,outliers	1715	755	0.377463	0.000419841	0.377463
NL_TISEAN_fnn_mi_10_005.firstunder03	NL_TISEAN_fnn_mi_10_005_firstunder03	nonlinear,dimension,tisean	4870	916	0.377158	0.00138651	0.377158
SY_LocalGlobal_l100.ac1	SY_LocalGlobal_AC1_l100	stationarity	845	498	-0.377153	0.000737727	0.377153
FC_Surprise_dist_100_5_udq_500.uq	FC_Surprise_dist_100_5_udq_500_uq	information,symbolic	2373	792	-0.376918	0.000419841	0.376918
ST_MomentCorr_002_02_mean_std_none.mi	ST_MomentCorr_002_02_mean_std_none_mi	statistics	7817	1056	-0.376913	0.0026422	0.376913
IN_AutoMutualInfoStats_40_gaussian.ami11	IN_AutoMutualInfoStats_40_gaussian_ami11	information,correlation,AMI	277	713	0.376731	0.000737727	0.376731
CO_Embed2_Shapes_tau_circle_01.statav5_s	CO_Embed2_Shapes_tau_circle_01_statav5_s	correlation,embedding,stationarity	1979	770	-0.376682	0.0017056	0.376682
PP_Compare_diff2.swms10_1	PP_Compare_diff2_swms10_1	preprocessing,raw,stationarity	6136	969	-0.376207	0.000737727	0.376207
NW_VisibilityGraph_horiz.dexpk_r2	NW_VisibilityGraph_horiz_dexpk_r2	network,visibilityGraph	2011	772	0.376131	0.00106923	0.376131
FC_LocalSimple_lfittau.gofr2	FC_LocalSimple_lfittau_gofr2	forecasting	3133	846	0.376036	0.00233709	0.376036
MF_hmm_08_2.Mu_1	MF_hmm_08_2_Mu_1	hmm,model	7732	1049	-0.375996	0.000419841	0.375996
CO_AddNoise_ac_kraskov1_4.fitexpa	CO_AddNoise_ac_kraskov1_4_fitexpa	correlation,AMI,entropy	1325	730	-0.375755	0.00202739	0.375755
PP_Compare_sin2.statav10	PP_Compare_sin2_statav10	preprocessing,raw,stationarity	5977	964	-0.375144	0.000737727	0.375144
MF_hmm_07_3.stdmeanP	MF_hmm_07_3_stdmeanP	hmm,model	7725	1048	-0.37473	0.000737727	0.37473
AC_25	AC_25	correlation	117	116	0.374531	0.00504878	0.374531
MF_AR_arcov_2.res_AC2	MF_AR_arcov_2_res_AC2	model,gof	3845	884	-0.374475	0.000419841	0.374475
DN_RemovePoints_absfar_01.median	DN_RemovePoints_absfar_01_median	correlation,outliers	1716	755	0.374437	0.000419841	0.374437
PP_Compare_spline24.swss2_2	PP_Compare_spline24_swss2_2	preprocessing,raw,stationarity	6014	965	-0.374296	0.000419841	0.374296
DN_RemovePoints_absclose_08.mean	DN_RemovePoints_absclose_08_mean	correlation,outliers	1704	754	-0.374149	0.000419841	0.374149
NL_MS_nlpe_3_ac.sbc1	NL_MS_nlpe_3_ac_sbc1	nonlinear,prediction,model	6879	1005	-0.373874	0.000737727	0.373874
CP_l1pwc_sweep_lambda_0_005_095.bestlambda	CP_l1pwc_sweep_lambda_0_005_095_bestlambda	stepdetection	7813	1055	0.373802	0.000419841	0.373802
DN_RemovePoints_max_01.skewnessrat	DN_RemovePoints_max_01_skewnessrat	correlation,outliers,distribution	1769	760	0.373722	0.000419841	0.373722
PP_Compare_diff1.swms2_2	PP_Compare_diff1_swms2_2	preprocessing,raw,stationarity	6102	968	-0.373594	0.000419841	0.373594
SB_MotifThree_quantile.aaba	SB_MotifThree_quantile_aaba	symbolic,motifs	3636	881	0.373371	0.000737727	0.373371
PP_Compare_resample_2_1.swms5_2	PP_Compare_resample_2_1_swms5_2	preprocessing,raw,stationarity	6414	978	-0.373326	0.000737727	0.373326
SY_SpreadRandomLocal_200_100.stdkurt	SY_SpreadRandomLocal_200_100_stdkurt	stationarity	2154	480	-0.373208	0.00106923	0.373208
CO_tc3_2.abs	CO_tc3_2_abs	correlation,nonlinear	1100	704	-0.372866	0.000419841	0.372866
DN_Moments_raw_7	DN_Moments_raw_7	distribution,moment,shape,raw,spreaddep	36	35	-0.372278	0.000419841	0.372278
SY_SpreadRandomLocal_ac2_100.meankurt	SY_SpreadRandomLocal_ac2_100_meankurt	stationarity	2082	476	0.37215	0.000419841	0.37215
RM_entropy	RM_entropy	entropy	868	513	0.37214	0.0026422	0.37214
CO_CompareMinAMI_std1_2_80.range	CO_CompareMinAMI_std1_2_80_range	correlation,AMI	449	717	0.372054	0.000737727	0.372054
IN_AutoMutualInfoStats_diff_20_gaussian.ami13	IN_AutoMutualInfoStats_diff_20_gaussian_ami13	information,correlation,AMI	389	715	-0.372033	0.000419841	0.372033
CO_Embed2_tau.std_eucds	CO_Embed2_tau_std_eucds	correlation,embedding,stationarity	1933	767	-0.371948	0.00106923	0.371948
PP_Compare_spline44.swms5_2	PP_Compare_spline44_swms5_2	preprocessing,raw,stationarity	6042	966	0.371921	0.000419841	0.371921
WL_coeffs_db3_max.wb50m	WL_coeffs_db3_max_wb50m	wavelet	6712	998	0.371904	0.000419841	0.371904
SD_TSTL_surrogates_mi_100_2_tc3.iqrsfrommedian	SD_TSTL_surrogates_mi_100_2_tc3_iqrsfrommedian	nonlinear,tstool,correlation,surrogate	5818	952	-0.371627	0.00106923	0.371627
MF_CompareAR_1_10_all.maxdiff	MF_CompareAR_1_10_all_maxdiff	model	7370	1028	0.371596	0.000737727	0.371596
FC_LocalSimple_lfit2.meanerr	FC_LocalSimple_lfit2_meanerr	forecasting	3089	842	-0.3715	0.000737727	0.3715
DN_Quantile_5	quantile_5	distribution	67	64	-0.371339	0.000419841	0.371339
MF_GP_hyperparameters_covSEiso_covPeriodic_covNoise_1_200_resample.std_S_data	MF_GP_hyperparameters_covSEiso_covPeriodic_covNoise_1_200_resample_std_S_data	model,GaussianProcess	6479	981	0.37133	0.000737727	0.37133
SP_Summaries_fft_logdev.fpolysat_r2	SP_Summaries_fft_logdev_fpolysat_r2	spectral	4684	911	0.371255	0.0041592	0.371255
PP_Compare_sin1.swss10_2	PP_Compare_sin1_swss10_2	preprocessing,raw,stationarity	5956	963	-0.370968	0.00106923	0.370968
CO_TranslateShape_circle_15_pts.statav3_m	CO_TranslateShape_circle_15_pts_statav3_m	correlation,stationarity	1791	762	-0.370916	0.00324615	0.370916
PH_ForcePotential_sine_3_05_1.ac1	PH_ForcePotential_sine_3_05_1_ac1	dynamicalSystem	1648	749	0.370681	0.000737727	0.370681
MF_CompareAR_1_10_all.stddiff	MF_CompareAR_1_10_all_stddiff	model	7369	1028	0.370355	0.000737727	0.370355
NW_VisibilityGraph_horiz.dpowerk_rmse	NW_VisibilityGraph_horiz_dpowerk_rmse	network,visibilityGraph	2017	772	-0.368677	0.0017056	0.368677
DN_OutlierInclude_n_001.stdrfexpb	DN_OutlierInclude_n_001_stdrfexpb	distribution,outliers	3302	865	0.36863	0.000419841	0.36863
FC_LoopLocalSimple_mean.stderr_peaksize	FC_LoopLocalSimple_mean_stderr_peaksize	forecasting	3041	838	-0.368477	0.000737727	0.368477
NL_TSTL_acp_mi_1__10.iqracpf_5	NL_TSTL_acp_mi_1__10_iqracpf_5	nonlinear,correlation	5109	924	-0.368082	0.00202739	0.368082
PP_Compare_resample_2_1.swms5_1	PP_Compare_resample_2_1_swms5_1	preprocessing,raw,stationarity	6413	978	-0.368008	0.000737727	0.368008
DN_Quantile_95	quantile_95	distribution	81	78	-0.367955	0.000419841	0.367955
PP_Compare_spline64.gauss1_kd_rmse	PP_Compare_spline64_gauss1_kd_rmse	preprocessing,raw	6082	967	-0.36775	0.000419841	0.36775
SY_DriftingMean100.max	SY_DriftingMean100_max	stationarity	2169	483	0.367645	0.000737727	0.367645
NL_MS_nlpe_2_mi.p4_5	NL_MS_nlpe_2_mi_p4_5	nonlinear,prediction,model	6837	1004	0.367607	0.000737727	0.367607
PP_Compare_rav2.swss2_2	PP_Compare_rav2_swss2_2	preprocessing,raw,stationarity	6262	973	0.367236	0.00446582	0.367236
SY_SlidingWindow_sampen_ent5_10	SY_SlidingWindow_sampen_ent5_10	stationarity	645	372	-0.367036	0.00138651	0.367036
PH_ForcePotential_sine_1_1_1.mean	PH_ForcePotential_sine_1_1_1_mean	dynamicalSystem	1654	750	-0.366932	0.000419841	0.366932
PH_ForcePotential_dblwell_1_05_02.proppos	PH_ForcePotential_dblwell_1_05_02_proppos	dynamicalSystem	1607	746	0.366829	0.000419841	0.366829
SY_LocalGlobal_l100.iqr	SY_LocalGlobal_iqr_l100	stationarity	803	498	-0.366818	0.00202739	0.366818
DN_RemovePoints_absclose_05.mean	DN_RemovePoints_absclose_05_mean	correlation,outliers	1693	753	-0.366536	0.000419841	0.366536
PP_Compare_diff1.swss2_1	PP_Compare_diff1_swss2_1	preprocessing,raw,stationarity	6106	968	0.36647	0.00593437	0.36647
SC_FluctAnal_2_nothing_50_logi.stdssr	SC_FluctAnal_2_nothing_50_logi_stdssr	scaling	3895	892	-0.366202	0.000419841	0.366202
CO_TranslateShape_rectangle_2_pts.statav4_s	CO_TranslateShape_rectangle_2_pts_statav4_s	correlation,stationarity	1844	765	-0.366106	0.00295429	0.366106
WL_coeffs_db3_max.max_coeff	WL_coeffs_db3_max_max_coeff	wavelet	6707	998	0.365797	0.000737727	0.365797
PP_Compare_resample_2_1.swms10_1	PP_Compare_resample_2_1_swms10_1	preprocessing,raw,stationarity	6415	978	-0.365755	0.00106923	0.365755
NL_MS_nlpe_3_ac.propbth	NL_MS_nlpe_3_ac_propbth	nonlinear,prediction,model	6874	1005	-0.365583	0.000419841	0.365583
DN_RemovePoints_min_01.skewnessrat	DN_RemovePoints_min_01_skewnessrat	correlation,outliers,distribution	1739	757	-0.365577	0.000419841	0.365577
CO_AddNoise_ac_quantiles_10.firstUnder75	CO_AddNoise_ac_quantiles_10_firstUnder75	correlation,AMI,entropy	1167	722	0.365476	0.00324615	0.365476
DN_CompareKSFit_norm.relent	DN_CompareKSFit_norm_relent	distribution,ksdensity,raw	3177	854	-0.364657	0.0026422	0.364657
IN_AutoMutualInfoStats_diff_20_gaussian.ami10	IN_AutoMutualInfoStats_diff_20_gaussian_ami10	information,correlation,AMI	386	715	-0.364639	0.000737727	0.364639
IN_AutoMutualInfoStats_40_gaussian.ami10	IN_AutoMutualInfoStats_40_gaussian_ami10	information,correlation,AMI	276	713	0.364638	0.000737727	0.364638
PH_ForcePotential_sine_1_1_1.proppos	PH_ForcePotential_sine_1_1_1_proppos	dynamicalSystem	1657	750	-0.364357	0.000419841	0.364357
MF_ExpSmoothing_05_best.minfpe	MF_ExpSmoothing_05_best_minfpe	model	7530	1034	0.364216	0.00706045	0.364216
MF_steps_ahead_ar_2_6.ac1_1	MF_steps_ahead_ar_2_6_ac1_1	model,prediction	7007	1011	0.364169	0.000737727	0.364169
TSTL_localdensity_5_40_1_3.maxden	TSTL_localdensity_5_40_1_3_maxden	nonlinear,tstool	5529	940	-0.364044	0.000419841	0.364044
SP_Summaries_pgram_hamm.wmax_5	SP_Summaries_pgram_hamm_wmax_5	spectral	4294	908	-0.363818	0.000737727	0.363818
DN_RemovePoints_absclose_05.sumabsacfdiff	DN_RemovePoints_absclose_05_sumabsacfdiff	correlation,outliers	1692	753	-0.363777	0.0041592	0.363777
CO_Embed2_Dist_tau.d_ac2	CO_Embed2_Dist_tau_d_ac2	correlation,embedding	1955	769	-0.363434	0.00138651	0.363434
PP_Compare_medianf3.kscn_peaksepy	PP_Compare_medianf3_kscn_peaksepy	preprocessing,raw	6180	970	-0.363101	0.00138651	0.363101
CO_StickAngles_y.ac2_p	CO_StickAngles_y_ac2_p	correlation	1885	766	-0.363069	0.000419841	0.363069
DN_RemovePoints_min_05.skewnessrat	DN_RemovePoints_min_05_skewnessrat	correlation,outliers,distribution	1749	758	-0.362815	0.000419841	0.362815
PP_Compare_sin2.statav6	PP_Compare_sin2_statav6	preprocessing,raw,stationarity	5975	964	-0.362735	0.000737727	0.362735
PP_Compare_spline64.swss10_1	PP_Compare_spline64_swss10_1	preprocessing,raw,stationarity	6079	967	-0.36252	0.000419841	0.36252
SB_MotifThree_quantile.abaa	SB_MotifThree_quantile_abaa	symbolic,motifs	3642	881	0.362461	0.000419841	0.362461
NL_TSTL_dimensions_50_ac_fnnmar.bc_lfitmmax	NL_TSTL_dimensions_50_ac_fnnmar_bc_lfitmmax	nonlinear,tstool,scaling,dimension	5344	932	-0.362083	0.000737727	0.362083
DN_Moments_raw_9	DN_Moments_raw_9	distribution,moment,shape,raw,spreaddep	38	37	-0.362078	0.000419841	0.362078
MF_FitSubsegments_arsbc_uniform_25_01.orders_mean	MF_FitSubsegments_arsbc_uniform_25_01_orders_mean	model,prediction,arfit	7098	1015	0.361858	0.000419841	0.361858
SY_DriftingMean100.meanabsmaxmin	SY_DriftingMean100_meanabsmaxmin	stationarity	2173	483	0.361579	0.000737727	0.361579
PH_ForcePotential_sine_1_1_1.median	PH_ForcePotential_sine_1_1_1_median	dynamicalSystem	1655	750	-0.361482	0.000419841	0.361482
DN_SimpleFit_gauss1_hsqrt.resruns	DN_SimpleFit_gauss1_resruns_hsqrt	distribution,gof,gauss1	3147	848	0.361444	0.00677932	0.361444
DN_RemovePoints_min_05.sumabsacfdiff	DN_RemovePoints_min_05_sumabsacfdiff	correlation,outliers	1746	758	0.361283	0.000737727	0.361283
NL_MS_nlpe_fnn_mi.normp	NL_MS_nlpe_fnn_mi_normp	nonlinear,prediction,model,slow	6908	1006	0.360684	0.00106923	0.360684
CO_tc3_1.num	CO_tc3_1_num	correlation,nonlinear	1096	703	-0.360416	0.000419841	0.360416
CO_AddNoise_ac_gaussian.firstUnder75	CO_AddNoise_ac_gaussian_firstUnder75	correlation,AMI,entropy	1280	728	0.360333	0.000737727	0.360333
SC_FluctAnal_2_rsrange_50_logi.logtausplit	SC_FluctAnal_2_rsrange_50_logi_logtausplit	scaling	4011	897	0.360264	0.000737727	0.360264
SY_DriftingMean100.min	SY_DriftingMean100_min	stationarity	2170	483	-0.360241	0.000737727	0.360241
MF_CompareTestSets_y_ar_best_uniform_25_01_1.mabserr_iqr	MF_CompareTestSets_y_ar_best_uniform_25_01_1_mabserr_iqr	model,prediction,arfit,stationarity	7185	1021	-0.360117	0.00106923	0.360117
SC_FluctAnal_2_rsrange_50_logi.prop_r1	SC_FluctAnal_2_rsrange_50_logi_prop_r1	scaling	4012	897	0.359974	0.000737727	0.359974
CO_AddNoise_ac_gaussian.pdec	CO_AddNoise_ac_gaussian_pdec	correlation,AMI,entropy	1276	728	-0.359923	0.000419841	0.359923
CO_CompareMinAMI_std1_2_80.std	CO_CompareMinAMI_std1_2_80_std	correlation,AMI	452	717	0.359684	0.000737727	0.359684
NL_MS_nlpe_3_ac.acmnd0	NL_MS_nlpe_3_ac_acmnd0	nonlinear,prediction,model	6872	1005	0.359505	0.000419841	0.359505
IN_AutoMutualInfoStats_diff_20_gaussian.ami12	IN_AutoMutualInfoStats_diff_20_gaussian_ami12	information,correlation,AMI	388	715	-0.359385	0.000737727	0.359385
MF_CompareTestSets_y_ar_best_uniform_25_01_1.mabserr_std	MF_CompareTestSets_y_ar_best_uniform_25_01_1_mabserr_std	model,prediction,arfit,stationarity	7184	1021	-0.359047	0.00138651	0.359047
NL_TSTL_dimensions_50_ac_fnnmar.scr_co_m2_meansqres	NL_TSTL_dimensions_50_ac_fnnmar_scr_co_m2_meansqres	nonlinear,tstool,scaling,dimension	5426	932	0.359038	0.000419841	0.359038
PP_Compare_spline44.swss2_1	PP_Compare_spline44_swss2_1	preprocessing,raw,stationarity	6044	966	-0.359005	0.000419841	0.359005
PP_Compare_spline64.swss2_1	PP_Compare_spline64_swss2_1	preprocessing,raw,stationarity	6075	967	-0.358531	0.000419841	0.358531
PP_Compare_sin1.swss5_2	PP_Compare_sin1_swss5_2	preprocessing,raw,stationarity	5954	963	-0.35827	0.000737727	0.35827
FC_Surprise_dist_100_4_udq_500.max	FC_Surprise_dist_100_4_udq_500_max	information,symbolic	2361	791	-0.358127	0.000419841	0.358127
PP_Compare_diff1.htdt_ksn	PP_Compare_diff1_htdt_ksn	preprocessing,raw	6123	968	-0.357942	0.00295429	0.357942
SY_SlidingWindow_mom4_ent5_1	SY_SlidingWindow_mom4_ent5_1	stationarity	689	416	-0.35793	0.00233709	0.35793
SY_TISEAN_nstat_z_5_1_3.mineig	SY_TISEAN_nstat_z_5_1_3_mineig	nonlinear,tisean,model,stationarity	4953	919	0.357896	0.00504878	0.357896
NL_MS_nlpe_3_ac.dwts	NL_MS_nlpe_3_ac_dwts	nonlinear,prediction,model	6876	1005	0.357763	0.000737727	0.357763
SB_TransitionpAlphabet_20_ac.mineigfexp_a	SB_TransitionpAlphabet_20_ac_mineigfexp_a	symbolic,transitionmat	1509	740	0.35768	0.000419841	0.35768
NL_MS_nlpe_3_ac.ac1	NL_MS_nlpe_3_ac_ac1	nonlinear,prediction,model	6866	1005	-0.357656	0.000737727	0.357656
DN_RemovePoints_absfar_08.mean	DN_RemovePoints_absfar_08_mean	correlation,outliers	1726	756	0.357637	0.000419841	0.357637
CO_Embed2_Shapes_tau_circle_1.hist_ent	CO_Embed2_Shapes_tau_circle_1_hist_ent	correlation,embedding	1991	771	0.357287	0.000737727	0.357287
MF_CompareTestSets_y_ss_2_uniform_25_01_1.mabserr_iqr	MF_CompareTestSets_y_ss_2_uniform_25_01_1_mabserr_iqr	model,prediction,stationarity	7225	1023	-0.356868	0.00138651	0.356868
SP_Summaries_welch_rect.fpolysat_a	SP_Summaries_welch_rect_fpolysat_a	spectral	4434	909	-0.356708	0.00106923	0.356708
SP_Summaries_fft.fpolysat_a	SP_Summaries_fft_fpolysat_a	spectral	4558	910	-0.356706	0.00106923	0.356706
ST_LocalExtrema_n50.maxabsext	ST_LocalExtrema_n50_maxabsext	distribution,stationarity	3397	869	-0.356532	0.00138651	0.356532
DN_FitKernelSmoothraw.plsym	DN_FitKernelSmoothraw_plsym	distribution,ksdensity,symmetry,raw	935	570	-0.356387	0.000419841	0.356387
IN_AutoMutualInfoStats_40_gaussian.ami12	IN_AutoMutualInfoStats_40_gaussian_ami12	information,correlation,AMI	278	713	0.356249	0.000737727	0.356249
NL_MS_nlpe_2_mi.minfpe	NL_MS_nlpe_2_mi_minfpe	nonlinear,prediction,model	6851	1004	-0.356017	0.000737727	0.356017
DN_RemovePoints_absclose_01.ac2diff	DN_RemovePoints_absclose_01_ac2diff	correlation,outliers	1678	752	0.35589	0.000419841	0.35589
PP_Compare_diff2.statav8	PP_Compare_diff2_statav8	preprocessing,raw,stationarity	6131	969	-0.355765	0.000737727	0.355765
SY_LocalGlobal_l500.ac1	SY_LocalGlobal_AC1_l500	stationarity	846	499	-0.355721	0.000737727	0.355721
DN_Moments_raw_11	DN_Moments_raw_11	distribution,moment,shape,raw,spreaddep	40	39	-0.355453	0.000419841	0.355453
MF_FitSubsegments_arsbc_rand_25_01.orders_mean	MF_FitSubsegments_arsbc_rand_25_01_orders_mean	model,prediction,arfit	7109	1016	0.355164	0.000419841	0.355164
PP_Compare_diff1.kscn_relent	PP_Compare_diff1_kscn_relent	preprocessing,raw	6121	968	0.355044	0.0026422	0.355044
MF_ARMA_orders_1_6_1_4.meanstd_aicsq	MF_ARMA_orders_1_6_1_4_meanstd_aicsq	model	7503	1033	-0.354308	0.0017056	0.354308
DN_CustomSkewness_bowley	skewness_bowley	distribution,moment,shape	42	41	-0.354142	0.000419841	0.354142
CO_tc3_mi.num	CO_tc3_mi_num	correlation,nonlinear	1116	707	-0.354023	0.00324615	0.354023
MF_CompareTestSets_y_ss_2_uniform_25_01_1.mabserr_std	MF_CompareTestSets_y_ss_2_uniform_25_01_1_mabserr_std	model,prediction,stationarity	7224	1023	-0.353956	0.0017056	0.353956
PH_Walker_momentum_2.w_mean	PH_Walker_momentum_2_w_mean	trend	2638	817	-0.353822	0.000737727	0.353822
SY_SpreadRandomLocal_200_100.meanmean	SY_SpreadRandomLocal_200_100_meanmean	stationarity	2143	480	-0.353715	0.00106923	0.353715
DN_RemovePoints_min_08.skewnessrat	DN_RemovePoints_min_08_skewnessrat	correlation,outliers,distribution	1759	759	-0.353653	0.000419841	0.353653
SY_DynWin10.stdmean	SY_DynWin_stdmean	stationarity	2068	774	0.35365	0.000737727	0.35365
SP_Summaries_pgram_hamm.fpolysat_a	SP_Summaries_pgram_hamm_fpolysat_a	spectral	4310	908	-0.353472	0.000419841	0.353472
EN_Randomize_permute.d1fexpr2	EN_Randomize_permute_d1fexpr2	entropy,slow	2941	832	-0.3529	0.000419841	0.3529
NL_MS_nlpe_fnn_mi.minfpe	NL_MS_nlpe_fnn_mi_minfpe	nonlinear,prediction,model,slow	6905	1006	-0.352865	0.000737727	0.352865
CO_AddNoise_ac_kraskov1_4.firstUnder75	CO_AddNoise_ac_kraskov1_4_firstUnder75	correlation,AMI,entropy	1318	730	-0.352849	0.0026422	0.352849
PP_Compare_medianf10.olbt_m5	PP_Compare_medianf10_olbt_m5	preprocessing,raw	6249	972	0.352737	0.000419841	0.352737
SC_FluctAnal_2_endptdiff_50_logi.meanssr	SC_FluctAnal_2_endptdiff_50_logi_meanssr	scaling	3918	893	0.352713	0.000737727	0.352713
PP_Compare_rav2.statav10	PP_Compare_rav2_statav10	preprocessing,raw,stationarity	6256	973	-0.352458	0.000737727	0.352458
DN_RemovePoints_min_05.fzcacrat	DN_RemovePoints_min_05_fzcacrat	correlation,outliers	1741	758	-0.352451	0.00138651	0.352451
DN_CompareKSFit_norm.peaksepx	DN_CompareKSFit_norm_psx	distribution,ksdensity,raw	3175	854	-0.352225	0.000419841	0.352225
NW_VisibilityGraph_horiz.dpowerk_r2	NW_VisibilityGraph_horiz_dpowerk_r2	network,visibilityGraph	2016	772	0.35204	0.00475654	0.35204
SP_Summaries_fft.wmax_5	SP_Summaries_fft_wmax_5	spectral	4542	910	-0.351806	0.000737727	0.351806
SP_Summaries_welch_rect.wmax_5	SP_Summaries_welch_rect_wmax_5	spectral	4418	909	-0.351791	0.000737727	0.351791
SC_FluctAnal_2_rsrangefit_50_1_logi.alpha	SC_FluctAnal_2_rsrangefit_50_1_logi_alpha	scaling	4030	898	0.351674	0.000737727	0.351674
FC_LocalSimple_meantau.swm	FC_LocalSimple_meantau_swm	forecasting	3032	837	0.351505	0.000737727	0.351505
DN_RemovePoints_max_08.skewnessrat	DN_RemovePoints_max_08_skewnessrat	correlation,outliers,distribution	1779	761	0.351467	0.000419841	0.351467
PP_Compare_diff2.htdt_ksn	PP_Compare_diff2_htdt_ksn	preprocessing,raw	6154	969	-0.351457	0.00355285	0.351457
SC_FluctAnal_2_dfa_50_1_logi.logtausplit	SC_FluctAnal_2_dfa_50_1_logi_logtausplit	scaling	4083	900	0.351092	0.00106923	0.351092
PH_ForcePotential_dblwell_1_05_02.median	PH_ForcePotential_dblwell_1_05_02_median	dynamicalSystem	1605	746	0.350892	0.00106923	0.350892
StatAvl100	StatAvl100	stationarity,StatAv	546	273	0.350868	0.000737727	0.350868
SC_FluctAnal_2_dfa_50_1_logi.prop_r1	SC_FluctAnal_2_dfa_50_1_logi_prop_r1	scaling	4084	900	0.350832	0.00106923	0.350832
FC_LocalSimple_lfittau.swm	FC_LocalSimple_lfittau_swm	forecasting	3132	846	0.350473	0.000737727	0.350473
MF_hmm_CompareNStates_06_24.meanLLtest	MF_hmm_CompareNStates_06_24_meanLLtest	hmm,model	7747	1050	0.350449	0.00106923	0.350449
PP_Compare_sin1.swms5_1	PP_Compare_sin1_swms5_1	preprocessing,raw,stationarity	5948	963	-0.350397	0.000419841	0.350397
PP_Compare_sin2.swms5_2	PP_Compare_sin2_swms5_2	preprocessing,raw,stationarity	5980	964	-0.349851	0.000737727	0.349851
PP_Compare_diff2.statav10	PP_Compare_diff2_statav10	preprocessing,raw,stationarity	6132	969	-0.349343	0.000737727	0.349343
MF_CompareAR_1_10_all.maxonmed	MF_CompareAR_1_10_all_maxonmed	model	7367	1028	0.349267	0.000737727	0.349267
MF_StateSpaceCompOrder_8.maxdiffaic	MF_StateSpaceCompOrder_8_maxdiffaic	model	7243	1024	-0.349146	0.000419841	0.349146
MF_CompareTestSets_y_ss_best_uniform_25_01_1.mabserr_iqr	MF_CompareTestSets_y_ss_best_uniform_25_01_1_mabserr_iqr	model,prediction,stationarity	7205	1022	-0.349051	0.00233709	0.349051
NL_MS_nlpe_3_ac.p5_5	NL_MS_nlpe_3_ac_p5_5	nonlinear,prediction,model	6865	1005	0.348951	0.000737727	0.348951
SY_SlidingWindow_ent_s5_1	SY_SlidingWindow_ent_s5_1	stationarity	607	334	-0.348697	0.0026422	0.348697
NL_MS_nlpe_2_mi.ac3	NL_MS_nlpe_2_mi_ac3	nonlinear,prediction,model	6841	1004	0.34867	0.0017056	0.34867
PP_Compare_spline24.olbt_m5	PP_Compare_spline24_olbt_m5	preprocessing,raw	6032	965	-0.348641	0.000419841	0.348641
AC_8	AC_8	correlation	100	99	0.348565	0.000737727	0.348565
DN_SimpleFit_exp1_hsqrt.r2	DN_SimpleFit_exp1_r2_hsqrt	distribution,gof,exp1	3163	852	-0.348346	0.00138651	0.348346
SB_BinaryStats_mean.meanstretchdiff	SB_BinaryStats_mean_meanstretchdiff	distribution,stationarity	3481	876	0.348142	0.000419841	0.348142
PP_Compare_rav3.swms10_1	PP_Compare_rav3_swms10_1	preprocessing,raw,stationarity	6291	974	-0.348135	0.000737727	0.348135
FC_LocalSimple_lfit3.meanerr	FC_LocalSimple_lfit3_meanerr	forecasting	3098	843	-0.348117	0.000737727	0.348117
SY_SlidingWindow_mom4_s5_2	SY_SlidingWindow_mom4_s5_2	stationarity	676	403	-0.347895	0.0026422	0.347895
SC_FluctAnal_2_nothing_50_logi.meanssr	SC_FluctAnal_2_nothing_50_logi_meanssr	scaling	3894	892	-0.347675	0.000419841	0.347675
CO_AddNoise_ac_kraskov1_4.linfit_mse	CO_AddNoise_ac_kraskov1_4_linfit_mse	correlation,AMI,entropy	1331	730	-0.347612	0.000419841	0.347612
SB_TransitionMatrix_3ac.T7	SB_TransitionMatrix_3ac_T7	symbolic,transitionmat	1399	736	0.347272	0.000419841	0.347272
PP_Compare_rav2.statav8	PP_Compare_rav2_statav8	preprocessing,raw,stationarity	6255	973	-0.347174	0.000737727	0.347174
MF_FitSubsegments_arma_2_2_uniform_25_01.p_2_max	MF_FitSubsegments_arma_2_2_uniform_25_01_p_2_max	model,prediction	7148	1019	-0.347139	0.000737727	0.347139
NL_MS_nlpe_2_mi.ac3n	NL_MS_nlpe_2_mi_ac3n	nonlinear,prediction,model	6844	1004	0.347069	0.0017056	0.347069
DN_RemovePoints_absfar_08.median	DN_RemovePoints_absfar_08_median	correlation,outliers	1727	756	0.34704	0.000419841	0.34704
SY_SpreadRandomLocal_ac2_100.meantaul	SY_SpreadRandomLocal_ac2_100_meantaul	stationarity	2086	476	0.347034	0.000737727	0.347034
FC_Surprise_T1_50_3_q_500.tstat	FC_Surprise_T1_50_3_q_500_tstat	information,symbolic	2287	781	-0.346872	0.000737727	0.346872
MF_CompareTestSets_y_ss_best_uniform_25_01_1.mabserr_std	MF_CompareTestSets_y_ss_best_uniform_25_01_1_mabserr_std	model,prediction,stationarity	7204	1022	-0.346817	0.00355285	0.346817
PP_Compare_medianf4.statav10	PP_Compare_medianf4_statav10	preprocessing,raw,stationarity	6194	971	-0.346752	0.000737727	0.346752
EN_mse_1-10_2_015.sampen_s6	EN_mse_1-10_2_015_sampen_s6	entropy,sampen,mse	2751	827	0.346414	0.000737727	0.346414
PP_Compare_resample_1_2.statav10	PP_Compare_resample_1_2_statav10	preprocessing,raw,stationarity	6380	977	-0.346413	0.000737727	0.346413
SY_DriftingMeann10.min	SY_DriftingMeann10_min	stationarity	2180	485	-0.346357	0.000737727	0.346357
SY_TISEAN_nstat_z_4_1_3.stdstd	SY_TISEAN_nstat_z_4_1_3_stdstd	nonlinear,tisean,model,stationarity	4922	918	-0.346327	0.00563844	0.346327
PP_Compare_medianf10.statav10	PP_Compare_medianf10_statav10	preprocessing,raw,stationarity	6225	972	-0.34615	0.000737727	0.34615
CO_CompareMinAMI_std1_2_80.nunique	CO_CompareMinAMI_std1_2_80_nunique	correlation,AMI	453	717	0.345775	0.000737727	0.345775
SY_TISEAN_nstat_z_4_1_3.rangestd	SY_TISEAN_nstat_z_4_1_3_rangestd	nonlinear,tisean,model,stationarity	4921	918	-0.345695	0.00563844	0.345695
FC_Surprise_dist_100_4_udq_500.mean	FC_Surprise_dist_100_4_udq_500_mean	information,symbolic	2362	791	0.345407	0.000419841	0.345407
NL_TSTL_acp_mi_1__10.iqracpf_10	NL_TSTL_acp_mi_1__10_iqracpf_10	nonlinear,correlation	5129	924	-0.345284	0.00593437	0.345284
NL_MS_nlpe_3_ac.acsnd0	NL_MS_nlpe_3_ac_acsnd0	nonlinear,prediction,model	6873	1005	0.345016	0.000737727	0.345016
CO_Embed2_Basic_tau.ratdiag05	CO_Embed2_Basic_tau_ratdiag05	correlation	1560	743	-0.34452	0.0017056	0.34452
SY_TISEAN_nstat_z_4_1_3.stdrange	SY_TISEAN_nstat_z_4_1_3_stdrange	nonlinear,tisean,model,stationarity	4920	918	-0.344349	0.00563844	0.344349
DN_SimpleFit_gauss2_hsqrt.resAC2	DN_SimpleFit_gauss2_AC2_hsqrt	distribution,gof,gauss2	3156	850	-0.344271	0.00106923	0.344271
MF_ARMA_orders_1_6_1_4.q_aic_opt	MF_ARMA_orders_1_6_1_4_q_aic_opt	model	7499	1033	-0.344031	0.0017056	0.344031
CO_StickAngles_y.symks_p	CO_StickAngles_y_symks_p	correlation	1855	766	-0.343953	0.00324615	0.343953
ST_MomentCorr_002_02_median_iqr_sqrt.mi	ST_MomentCorr_002_02_median_iqr_sqrt_mi	statistics	7837	1061	-0.343829	0.0041592	0.343829
NL_TSTL_acp_mi_1__10.iqracpf_6	NL_TSTL_acp_mi_1__10_iqracpf_6	nonlinear,correlation	5113	924	-0.343775	0.00385458	0.343775
SC_FluctAnal_2_nothing_50_logi.se2	SC_FluctAnal_2_nothing_50_logi_se2	scaling	3888	892	-0.343712	0.000419841	0.343712
SC_FluctAnal_2_nothing_50_logi.se1	SC_FluctAnal_2_nothing_50_logi_se1	scaling	3887	892	-0.343712	0.000419841	0.343712
MF_AR_arcov_2.res_AC1	MF_AR_arcov_2_res_AC1	model,gof	3844	884	-0.34363	0.00295429	0.34363
SY_LocalGlobal_p05.ac1	SY_LocalGlobal_AC1_p05	stationarity	848	501	-0.343559	0.000737727	0.343559
PP_Compare_sin2.swms5_1	PP_Compare_sin2_swms5_1	preprocessing,raw,stationarity	5979	964	-0.343279	0.000737727	0.343279
ST_SimpleStats_pmcross	ST_SimpleStats_pmcross	distribution	89	88	0.343246	0.000419841	0.343246
SY_TISEAN_nstat_z_4_1_3.rangerange	SY_TISEAN_nstat_z_4_1_3_rangerange	nonlinear,tisean,model,stationarity	4919	918	-0.343235	0.00563844	0.343235
SY_DriftingMean50.min	SY_DriftingMean50_min	stationarity	2165	482	-0.343209	0.000737727	0.343209
NL_TSTL_FractalDimensions_5_100_02_1_10_0_32_ac_3.maxq	NL_TSTL_FractalDimensions_5_100_02_1_10_0_32_ac_3_maxq	nonlinear,tstool,dimension,correlation,stochastic	5467	934	-0.343061	0.0017056	0.343061
DN_RemovePoints_absclose_08.skewnessrat	DN_RemovePoints_absclose_08_skewnessrat	correlation,outliers,distribution	1707	754	-0.342938	0.000419841	0.342938
SY_SpreadRandomLocal_100_100.stdmean	SY_SpreadRandomLocal_100_100_stdmean	stationarity	2135	479	0.34252	0.000737727	0.34252
EN_SampEn_5_02.meanchsampen	EN_SampEn_5_02_meanchsampen	entropy,sampen	2725	823	0.342326	0.00106923	0.342326
NL_MS_nlpe_3_ac.p2_5	NL_MS_nlpe_3_ac_p2_5	nonlinear,prediction,model	6862	1005	-0.342305	0.000737727	0.342305
PP_Compare_diff1.kscn_peaksepy	PP_Compare_diff1_kscn_peaksepy	preprocessing,raw	6118	968	0.342295	0.00138651	0.342295
CO_TranslateShape_circle_15_pts.statav4_m	CO_TranslateShape_circle_15_pts_statav4_m	correlation,stationarity	1793	762	-0.342278	0.00792097	0.342278
NL_TSTL_dimensions_50_ac_fnnmar.scr_bc_m2_pgone	NL_TSTL_dimensions_50_ac_fnnmar_scr_bc_m2_pgone	nonlinear,tstool,scaling,dimension	5388	932	0.342165	0.000419841	0.342165
NL_TSTL_acp_1_001_025_10_05.propdecmacpf	NL_TSTL_acp_1_001_025_10_05_propdecmacpf	nonlinear,correlation	5133	925	-0.342122	0.000419841	0.342122
CP_ML_StepDetect_l1pwc_02.meanstepintgt3	CP_ML_StepDetect_l1pwc_02_meanstepintgt3	stepdetection	7801	1054	0.342096	0.000737727	0.342096
PP_Compare_poly1.swss10_2	PP_Compare_poly1_swss10_2	preprocessing,raw,stationarity	5894	961	-0.342056	0.000419841	0.342056
SY_SlidingWindow_m_sampen10_2	SY_SlidingWindow_m_sampen10_2	stationarity	570	297	0.341886	0.000737727	0.341886
FC_Surprise_dist_100_4_udq_500.min	FC_Surprise_dist_100_4_udq_500_min	information,symbolic	2360	791	0.341844	0.00202739	0.341844
NL_TSTL_dimensions_50_ac_fnnmar.co_meanmmax	NL_TSTL_dimensions_50_ac_fnnmar_co_meanmmax	nonlinear,tstool,scaling,dimension	5356	932	-0.341631	0.00202739	0.341631
CO_AddNoise_ac_gaussian.ami_at_10	CO_AddNoise_ac_gaussian_ami_at_10	correlation,AMI,entropy	1284	728	-0.341612	0.000737727	0.341612
PP_Compare_medianf4.statav8	PP_Compare_medianf4_statav8	preprocessing,raw,stationarity	6193	971	-0.341359	0.000737727	0.341359
SP_Summaries_fft_logdev.ac2	SP_Summaries_fft_logdev_ac2	spectral	4664	911	-0.341344	0.00324615	0.341344
WL_cwt_sym2_32.pcross_maxssc50	WL_cwt_sym2_32_pcross_maxssc50	wavelet,cwt	6629	990	0.341277	0.0141833	0.341277
PP_Compare_resample_1_2.statav8	PP_Compare_resample_1_2_statav8	preprocessing,raw,stationarity	6379	977	-0.341135	0.000737727	0.341135
CO_AddNoise_ac_even_10.ami_at_10	CO_AddNoise_ac_even_10_ami_at_10	correlation,AMI,entropy	1209	724	-0.341085	0.00324615	0.341085
PP_Compare_rav10.olbt_m5	PP_Compare_rav10_olbt_m5	preprocessing,raw	6373	976	0.341017	0.000419841	0.341017
SC_FluctAnal_2_iqr_50_logi.resac1	SC_FluctAnal_2_iqr_50_logi_resac1	scaling	3986	896	0.340991	0.000737727	0.340991
PP_Compare_medianf4.swss2_2	PP_Compare_medianf4_swss2_2	preprocessing,raw,stationarity	6200	971	0.340939	0.00734991	0.340939
PP_Compare_medianf10.statav8	PP_Compare_medianf10_statav8	preprocessing,raw,stationarity	6224	972	-0.340804	0.000737727	0.340804
FC_LocalSimple_lfit4.meanerr	FC_LocalSimple_lfit4_meanerr	forecasting	3108	844	-0.340473	0.000737727	0.340473
FC_Surprise_dist_50_3_udq_500.tstat	FC_Surprise_dist_50_3_udq_500_tstat	information,symbolic	2359	790	0.340433	0.00233709	0.340433
SC_FluctAnal_2_dfa_50_1_3_logi.se1	SC_FluctAnal_2_dfa_50_1_3_logi_se1	scaling	4175	904	0.34034	0.00106923	0.34034
SC_FluctAnal_2_dfa_50_1_3_logi.se2	SC_FluctAnal_2_dfa_50_1_3_logi_se2	scaling	4176	904	0.34034	0.00106923	0.34034
PH_Walker_prop_11.res_swss5_1	PH_Walker_prop_11_swss5_1	trend,stationarity	2596	814	-0.340286	0.00677932	0.340286
DN_SimpleFit_gauss2_hsqrt.resAC1	DN_SimpleFit_gauss2_AC1_hsqrt	distribution,gof,gauss2	3155	850	-0.340117	0.00324615	0.340117
NL_TISEAN_c1_1_2_6_25_01.mind	NL_TISEAN_c1_1_2_6_25_01_mind	nonlinear,tisean,dimension,entropy	5072	923	-0.340085	0.000737727	0.340085
PP_Compare_resample_2_1.kscn_olapint	PP_Compare_resample_2_1_kscn_olapint	preprocessing,raw	6430	978	0.339733	0.00324615	0.339733
CO_StickAngles_y.statav5_p_m	CO_StickAngles_y_statav5_p_m	correlation,stationarity	1877	766	-0.339606	0.00138651	0.339606
SY_SlidingWindow_m_s10_10	SY_SlidingWindow_m_s10_10	stationarity	566	293	0.339127	0.000737727	0.339127
SY_DriftingMean50.meanabsmaxmin	SY_DriftingMean50_meanabsmaxmin	stationarity	2168	482	0.339119	0.00106923	0.339119
SY_DriftingMean50.max	SY_DriftingMean50_max	stationarity	2164	482	0.338998	0.00106923	0.338998
SY_SlidingWindow_m_s10_2	SY_SlidingWindow_m_s10_2	stationarity	565	292	0.33882	0.000737727	0.33882
StatAvl50	StatAvl50	stationarity,StatAv	545	272	0.338754	0.00106923	0.338754
MF_armax_2_2_05_1.p2_5	MF_armax_2_2_05_1_p2_5	model	7477	1032	0.338711	0.00563844	0.338711
StatAvl150	StatAvl150	stationarity,StatAv	547	274	0.338511	0.000737727	0.338511
SY_SlidingWindow_m_s_8_1	StatAv8	stationarity,StatAv	558	285	0.338511	0.000737727	0.338511
SY_SlidingWindow_lil_ent5_1	SY_SlidingWindow_lil_ent5_1	stationarity	712	439	0.33838	0.00622858	0.33838
NL_MS_nlpe_3_ac.ac1n	NL_MS_nlpe_3_ac_ac1n	nonlinear,prediction,model	6869	1005	0.338283	0.00138651	0.338283
SC_FluctAnal_2_iqr_50_logi.ssr	SC_FluctAnal_2_iqr_50_logi_ssr	scaling	3985	896	0.338226	0.000737727	0.338226
SC_FluctAnal_2_range_50_logi.se2	SC_FluctAnal_2_range_50_logi_se2	scaling	3936	894	0.337701	0.000737727	0.337701
SC_FluctAnal_2_range_50_logi.se1	SC_FluctAnal_2_range_50_logi_se1	scaling	3935	894	0.337701	0.000737727	0.337701
SB_MotifThree_diffquant.caa	SB_MotifThree_diffquant_caa	symbolic,motifs	3743	882	0.337508	0.000737727	0.337508
PH_Walker_momentum_5.w_median	PH_Walker_momentum_5_w_median	trend	2659	818	0.33725	0.000419841	0.33725
NL_MS_nlpe_3_ac.ac3	NL_MS_nlpe_3_ac_ac3	nonlinear,prediction,model	6868	1005	0.337177	0.0017056	0.337177
NL_TSTL_acp_1_001_025_10_05.iqracpf_2	NL_TSTL_acp_1_001_025_10_05_iqracpf_2	nonlinear,correlation	5149	925	-0.337175	0.00475654	0.337175
EN_CID.minCE2	EN_CID_minCE2	entropy,distribution	871	514	-0.337123	0.00295429	0.337123
PH_Walker_prop_05.res_runstest	PH_Walker_prop_05_res_runstest	trend	2555	812	0.337072	0.00106923	0.337072
CO_Embed2_Basic_tau.parabup01_1	CO_Embed2_Basic_tau_parabup01_1	correlation	1565	743	0.337045	0.000419841	0.337045
PP_Compare_rav4.olbt_m5	PP_Compare_rav4_olbt_m5	preprocessing,raw	6342	975	0.336914	0.000419841	0.336914
CO_AddNoise_ac_std1_10.fitexpa	CO_AddNoise_ac_std1_10_fitexpa	correlation,AMI,entropy	1250	726	-0.336686	0.00649604	0.336686
CO_AddNoise_ac_even_10.fitlina	CO_AddNoise_ac_even_10_fitlina	correlation,AMI,entropy	1216	724	0.336523	0.00622858	0.336523
CO_AddNoise_ac_even_10.fitexpa	CO_AddNoise_ac_even_10_fitexpa	correlation,AMI,entropy	1212	724	-0.336387	0.00677932	0.336387
EN_DistributionEntropy_hist_20_0	EN_DistributionEntropy_hist_20_0	entropy	892	533	0.336248	0.00622858	0.336248
IN_AutoMutualInfoStats_40_gaussian.ami9	IN_AutoMutualInfoStats_40_gaussian_ami9	information,correlation,AMI	275	713	0.336051	0.00106923	0.336051
NL_TSTL_dimensions_50_ac_fnnmar.bc_lfitb2	NL_TSTL_dimensions_50_ac_fnnmar_bc_lfitb2	nonlinear,tstool,scaling,dimension	5346	932	0.336018	0.000737727	0.336018
NL_TSTL_acp_mi_1__10.iqracpf_9	NL_TSTL_acp_mi_1__10_iqracpf_9	nonlinear,correlation	5125	924	-0.335865	0.00649604	0.335865
CO_AddNoise_ac_even_10.meanch	CO_AddNoise_ac_even_10_meanch	correlation,AMI,entropy	1202	724	0.335795	0.00677932	0.335795
PP_Compare_resample_1_2.olbt_m5	PP_Compare_resample_1_2_olbt_m5	preprocessing,raw	6404	977	0.335738	0.000419841	0.335738
PH_Walker_momentum_5.w_mean	PH_Walker_momentum_5_w_mean	trend	2658	818	-0.335694	0.00138651	0.335694
NL_MS_nlpe_fnn_mi.ac3	NL_MS_nlpe_fnn_mi_ac3	nonlinear,prediction,model,slow	6895	1006	0.335576	0.0026422	0.335576
ST_MomentCorr_002_02_median_iqr_sqrt.absR	ST_MomentCorr_002_02_median_iqr_sqrt_absR	statistics	7835	1061	-0.335495	0.00535122	0.335495
CO_AddNoise_ac_std1_10.fitlinb	CO_AddNoise_ac_std1_10_fitlinb	correlation,AMI,entropy	1255	726	-0.335418	0.00649604	0.335418
MF_GP_hyperparameters_covSEiso_covNoise_1_200_first.logh1	MF_GP_hyperparameters_covSEiso_covNoise_1_200_first_logh1	model,GaussianProcess	6483	982	0.335263	0.000737727	0.335263
FC_Surprise_dist_100_5_udq_500.max	FC_Surprise_dist_100_5_udq_500_max	information,symbolic	2369	792	-0.334809	0.000419841	0.334809
MF_armax_3_1_05_1.AR_2	MF_armax_3_1_05_1_AR_2	model	7395	1030	-0.334722	0.00106923	0.334722
CO_Embed2_tau.mean_eucds	CO_Embed2_tau_mean_eucds	correlation,embedding,stationarity	1934	767	-0.334271	0.00233709	0.334271
MF_FitSubsegments_arma_2_2_uniform_25_01.q_1_max	MF_FitSubsegments_arma_2_2_uniform_25_01_q_1_max	model,prediction	7152	1019	-0.33415	0.000737727	0.33415
MF_GP_FitAcross_covSEiso_covNoise_20.logh1	MF_GP_FitAcross_covSEiso_covNoise_20_logh1	model,GaussianProcess	6581	988	-0.334102	0.000419841	0.334102
AC_26	AC_26	correlation	118	117	0.334072	0.0093034	0.334072
NL_TSTL_acp_mi_1__10.iqracpf_7	NL_TSTL_acp_mi_1__10_iqracpf_7	nonlinear,correlation	5117	924	-0.334037	0.00622858	0.334037
PP_Compare_rav3.olbt_m5	PP_Compare_rav3_olbt_m5	preprocessing,raw	6311	974	0.333863	0.000419841	0.333863
FC_LocalSimple_lfit5.sws	FC_LocalSimple_lfit5_sws	forecasting	3121	845	-0.333861	0.00903276	0.333861
NL_TSTL_acp_mi_1__10.iqracpf_8	NL_TSTL_acp_mi_1__10_iqracpf_8	nonlinear,correlation	5121	924	-0.333859	0.00677932	0.333859
SB_MotifThree_quantile.bcbc	SB_MotifThree_quantile_bcbc	symbolic,motifs	3683	881	0.333771	0.0115059	0.333771
PP_Compare_spline44.gauss1_kd_resAC1	PP_Compare_spline44_gauss1_kd_resAC1	preprocessing,raw	6052	966	-0.333741	0.000419841	0.333741
SY_LocalGlobal_p5.ac1	SY_LocalGlobal_AC1_p5	stationarity	850	503	-0.333465	0.00138651	0.333465
DN_RemovePoints_absfar_01.skewnessrat	DN_RemovePoints_absfar_01_skewnessrat	correlation,outliers,distribution	1718	755	0.333199	0.000419841	0.333199
PP_Compare_medianf4.olbt_m5	PP_Compare_medianf4_olbt_m5	preprocessing,raw	6218	971	0.333156	0.000419841	0.333156
DN_HistogramMode_20	DN_HistogramMode_20	distribution,location	13	12	0.33315	0.000419841	0.33315
WL_coeffs_db3_max.wb90m	WL_coeffs_db3_max_wb90m	wavelet	6710	998	0.333143	0.000419841	0.333143
CO_trev_mi.denom	CO_trev_mi_denom	correlation,nonlinear	1143	712	-0.332962	0.00106923	0.332962
SY_DriftingMeann10.meanabsmaxmin	SY_DriftingMeann10_meanabsmaxmin	stationarity	2183	485	0.332912	0.000737727	0.332912
PP_Compare_sin2.statav4	PP_Compare_sin2_statav4	preprocessing,raw,stationarity	5974	964	-0.332817	0.00106923	0.332817
DN_RemovePoints_absclose_08.median	DN_RemovePoints_absclose_08_median	correlation,outliers	1705	754	-0.332799	0.000419841	0.332799
DN_OutlierInclude_n_001.nflrmse	DN_OutlierInclude_n_001_nflrmse	distribution,outliers	3292	865	-0.332676	0.000737727	0.332676
MF_AR_arcov_4.res_AC1	MF_AR_arcov_4_res_AC1	model,gof	3861	886	0.332223	0.0228733	0.332223
PP_Compare_spline44.kscn_peaksepy	PP_Compare_spline44_kscn_peaksepy	preprocessing,raw	6056	966	-0.331987	0.000419841	0.331987
CO_AddNoise_ac_even_10.fitlinb	CO_AddNoise_ac_even_10_fitlinb	correlation,AMI,entropy	1217	724	-0.331692	0.00792097	0.331692
SP_Summaries_pgram_hamm.wmax_10	SP_Summaries_pgram_hamm_wmax_10	spectral	4295	908	-0.331425	0.000737727	0.331425
DN_RemovePoints_min_08.mean	DN_RemovePoints_min_08_mean	correlation,outliers	1757	759	-0.3307	0.000419841	0.3307
PP_Compare_medianf10.olbt_m2	PP_Compare_medianf10_olbt_m2	preprocessing,raw	6248	972	0.330673	0.000419841	0.330673
CO_AddNoise_ac_even_10.fitexpb	CO_AddNoise_ac_even_10_fitexpb	correlation,AMI,entropy	1213	724	0.330653	0.00792097	0.330653
NL_crptool_fnn_10_2_mi.fnn2	NL_crptool_fnn_10_2_mi_fnn2	nonlinear,dimension,crptool	4756	912	0.330578	0.000419841	0.330578
SY_SlidingWindow_lil_ent2_10	SY_SlidingWindow_lil_ent2_10	stationarity	711	438	0.330444	0.00706045	0.330444
EN_Randomize_statdist.ac3diff	EN_Randomize_statdist_ac3diff	entropy,slow	2834	830	-0.330424	0.000737727	0.330424
FC_Surprise_T2_100_tau_m2quad_500.median	FC_Surprise_T2_100_tau_m2quad_500_median	information,symbolic	2513	810	-0.330293	0.00106923	0.330293
NL_MS_nlpe_2_mi.normp	NL_MS_nlpe_2_mi_normp	nonlinear,prediction,model	6854	1004	0.330248	0.000419841	0.330248
PP_Compare_resample_2_1.statav4	PP_Compare_resample_2_1_statav4	preprocessing,raw,stationarity	6408	978	-0.330103	0.000737727	0.330103
IN_AutoMutualInfoStats_diff_20_gaussian.amiac1	IN_AutoMutualInfoStats_diff_20_gaussian_amiac1	information,correlation,AMI	411	715	-0.330064	0.000737727	0.330064
SB_TransitionMatrix_2ac.ondiag	SB_TransitionMatrix_2ac_ondiag	symbolic,transitionmat	1387	735	-0.329831	0.000737727	0.329831
SY_LocalGlobal_l50.ac1	SY_LocalGlobal_AC1_l50	stationarity	844	497	-0.329504	0.000737727	0.329504
NL_MS_nlpe_fnn_mi.ac3n	NL_MS_nlpe_fnn_mi_ac3n	nonlinear,prediction,model,slow	6898	1006	0.32943	0.00324615	0.32943
NL_BoxCorrDim_50_ac_5.minr10	NL_BoxCorrDim_50_ac_5_minr10	nonlinear,correlation,tstool,dimension	5228	926	-0.329342	0.0017056	0.329342
PH_Walker_momentum_2.w_max	PH_Walker_momentum_2_w_max	trend	2645	817	-0.329147	0.00649604	0.329147
SY_SlidingWindow_m_s_10_1	StatAv10	stationarity,StatAv	560	287	0.329097	0.000737727	0.329097
EN_Randomize_statdist.xc1fexprmse	EN_Randomize_statdist_xc1fexprmse	entropy,slow	2809	830	-0.328963	0.000419841	0.328963
SY_SlidingWindow_m_s_9_1	StatAv9	stationarity,StatAv	559	286	0.32888	0.000737727	0.32888
PP_Compare_resample_1_2.olbt_m2	PP_Compare_resample_1_2_olbt_m2	preprocessing,raw	6403	977	0.328789	0.000419841	0.328789
PP_Compare_rav3.swss2_2	PP_Compare_rav3_swss2_2	preprocessing,raw,stationarity	6293	974	0.328683	0.00875623	0.328683
PP_Compare_rav4.swms10_1	PP_Compare_rav4_swms10_1	preprocessing,raw,stationarity	6322	975	-0.328557	0.000737727	0.328557
SB_MotifThree_diffquant.bcaa	SB_MotifThree_diffquant_bcaa	symbolic,motifs	3798	882	0.328516	0.00355285	0.328516
NL_TSTL_ReturnTime_005_1_005_n1_1_3.max	NL_TSTL_ReturnTime_005_1_005_n1_1_3_max	nonlinear,tstool	5778	948	0.327893	0.000419841	0.327893
SY_DriftingMeann10.max	SY_DriftingMeann10_max	stationarity	2179	485	0.327832	0.00106923	0.327832
EN_Randomize_permute.swss5_1diff	EN_Randomize_permute_swss5_1diff	entropy,slow,stationarity	2987	832	-0.327746	0.00535122	0.327746
FC_LocalSimple_mean3.gofr2	FC_LocalSimple_mean3_gofr2	forecasting	3013	835	0.327739	0.0093034	0.327739
PP_Compare_sin1.statav8	PP_Compare_sin1_statav8	preprocessing,raw,stationarity	5945	963	-0.327659	0.000419841	0.327659
PH_ForcePotential_dblwell_1_05_02.mean	PH_ForcePotential_dblwell_1_05_02_mean	dynamicalSystem	1604	746	0.327336	0.00202739	0.327336
NL_MS_nlpe_3_ac.ac3n	NL_MS_nlpe_3_ac_ac3n	nonlinear,prediction,model	6871	1005	0.327204	0.00324615	0.327204
PP_Compare_spline44.gauss1_kd_resAC2	PP_Compare_spline44_gauss1_kd_resAC2	preprocessing,raw	6053	966	-0.327175	0.000419841	0.327175
EN_mse_1-10_2_015.sampen_s7	EN_mse_1-10_2_015_sampen_s7	entropy,sampen,mse	2752	827	0.326847	0.0017056	0.326847
FC_Surprise_dist_50_3_udq_500.std	FC_Surprise_dist_50_3_udq_500_std	information,symbolic	2358	790	-0.326612	0.00385458	0.326612
SY_SlidingWindow_mom4_s5_10	SY_SlidingWindow_mom4_s5_10	stationarity	677	404	-0.326311	0.00535122	0.326311
NL_crptool_fnn_10_2_ac.fnn2	NL_crptool_fnn_10_2_ac_fnn2	nonlinear,dimension,crptool	4772	913	0.326265	0.00819075	0.326265
SY_SlidingWindow_ac1_s2_10	SY_SlidingWindow_ac1_s2_10	stationarity	720	447	-0.326218	0.013102	0.326218
SD_TSTL_surrogates_mi_100_3_trev.ksphereonmax	SD_TSTL_surrogates_mi_100_3_trev_ksphereonmax	nonlinear,tstool,correlation,surrogate	5878	960	0.326135	0.0101376	0.326135
CO_AddNoise_ac_gaussian.ami_at_20	CO_AddNoise_ac_gaussian_ami_at_20	correlation,AMI,entropy	1286	728	-0.325915	0.000737727	0.325915
PP_Compare_rav2.olbt_m5	PP_Compare_rav2_olbt_m5	preprocessing,raw	6280	973	0.325839	0.000419841	0.325839
NL_MS_nlpe_2_mi.propbth	NL_MS_nlpe_2_mi_propbth	nonlinear,prediction,model	6847	1004	-0.32544	0.00138651	0.32544
PP_Compare_resample_1_2.kscn_olapint	PP_Compare_resample_1_2_kscn_olapint	preprocessing,raw	6399	977	0.325319	0.0128399	0.325319
EN_Randomize_permute.xc1fexpb	EN_Randomize_permute_xc1fexpb	entropy,slow	2933	832	0.325318	0.000737727	0.325318
PP_Compare_diff2.kscn_relent	PP_Compare_diff2_kscn_relent	preprocessing,raw	6152	969	0.324896	0.00875623	0.324896
PP_Compare_rav10.olbt_m2	PP_Compare_rav10_olbt_m2	preprocessing,raw	6372	976	0.324797	0.000419841	0.324797
SY_SpreadRandomLocal_50_100.stdtaul	SY_SpreadRandomLocal_50_100_stdtaul	stationarity	2126	478	0.324577	0.00106923	0.324577
SY_SlidingWindow_s_s2_10	SY_SlidingWindow_s_s2_10	stationarity	583	310	-0.324393	0.00875623	0.324393
SY_LocalGlobal_l500.absmean	SY_LocalGlobal_absmean_l500	stationarity	762	499	0.32436	0.000737727	0.32436
PP_Compare_diff2.statav6	PP_Compare_diff2_statav6	preprocessing,raw,stationarity	6130	969	-0.324013	0.000737727	0.324013
SC_FluctAnal_2_rsrange_50_logi.alpha	SC_FluctAnal_2_rsrange_50_logi_alpha	scaling	4006	897	0.323737	0.00138651	0.323737
SP_Summaries_welch_rect.wmax_10	SP_Summaries_welch_rect_wmax_10	spectral	4419	909	-0.323706	0.000737727	0.323706
SP_Summaries_fft.wmax_10	SP_Summaries_fft_wmax_10	spectral	4543	910	-0.323613	0.000737727	0.323613
ST_MomentCorr_002_02_median_iqr_none.R	ST_MomentCorr_002_02_median_iqr_none_R	statistics	7818	1057	-0.323606	0.000737727	0.323606
FC_LocalSimple_mean4.gofr2	FC_LocalSimple_mean4_gofr2	forecasting	3023	836	0.323529	0.0147357	0.323529
WL_DetailCoeffs_db3_max.corrcoef_max_medians	WL_DetailCoeffs_db3_max_corrcoef_max_medians	wavelet	6655	992	-0.323453	0.00138651	0.323453
SY_SlidingWindow_ent_ent2_10	SY_SlidingWindow_ent_ent2_10	stationarity	619	346	-0.323329	0.0093034	0.323329
EN_CID.minCE1	EN_CID_minCE1	entropy,distribution	870	514	-0.32329	0.00819075	0.32329
PP_Compare_rav4.olbt_m2	PP_Compare_rav4_olbt_m2	preprocessing,raw	6341	975	0.323036	0.000419841	0.323036
MF_hmm_07_3.LLtestpersample	MF_hmm_07_3_LLtestpersample	hmm,model	7730	1048	0.323	0.00446582	0.323
SY_SpreadRandomLocal_100_100.meantaul	SY_SpreadRandomLocal_100_100_meantaul	stationarity	2134	479	0.322977	0.00138651	0.322977
SY_SpreadRandomLocal_50_100.stdmean	SY_SpreadRandomLocal_50_100_stdmean	stationarity	2119	478	0.322937	0.0017056	0.322937
SB_TransitionpAlphabet_20_ac.trcov_jump	SB_TransitionpAlphabet_20_ac_trcov_jump	symbolic,transitionmat	1496	740	0.322799	0.000419841	0.322799
SY_SlidingWindow_m_ent10_2	SY_SlidingWindow_m_ent10_2	stationarity	579	306	0.322359	0.00106923	0.322359
FC_LocalSimple_median3.gofr2	FC_LocalSimple_median3_gofr2	forecasting	3064	839	0.322313	0.00957229	0.322313
DN_SimpleFit_exp1_hsqrt.resruns	DN_SimpleFit_exp1_resruns_hsqrt	distribution,gof,exp1	3167	852	0.322234	0.0026422	0.322234
PP_Compare_medianf4.olbt_m2	PP_Compare_medianf4_olbt_m2	preprocessing,raw	6217	971	0.32205	0.000419841	0.32205
EN_Randomize_permute.xcn1fexpb	EN_Randomize_permute_xcn1fexpb	entropy,slow	2927	832	0.322001	0.000737727	0.322001
CO_AddNoise_ac_std1_10.ami_at_5	CO_AddNoise_ac_std1_10_ami_at_5	correlation,AMI,entropy	1246	726	-0.321803	0.00475654	0.321803
SB_TransitionpAlphabet_20_ac.maxdiagfexp_b	SB_TransitionpAlphabet_20_ac_maxdiagfexp_b	symbolic,transitionmat	1485	740	0.321711	0.000737727	0.321711
PP_Compare_rav3.olbt_m2	PP_Compare_rav3_olbt_m2	preprocessing,raw	6310	974	0.321681	0.000419841	0.321681
SY_DynWin10.stdkurt	SY_DynWin_stdkurt	stationarity	2071	774	-0.321128	0.00475654	0.321128
SY_LocalGlobal_p1.skewness	SY_LocalGlobal_skewness_p1	stationarity	821	502	0.32095	0.00763437	0.32095
PP_Compare_rav2.swms5_2	PP_Compare_rav2_swms5_2	preprocessing,raw,stationarity	6259	973	-0.320802	0.000737727	0.320802
CO_Embed2_Shapes_tau_circle_1.mode_val	CO_Embed2_Shapes_tau_circle_1_mode_val	correlation,embedding	1989	771	-0.320781	0.0041592	0.320781
MF_CompareAR_1_10_all.firstonmin	MF_CompareAR_1_10_all_firstonmin	model	7366	1028	0.320684	0.00138651	0.320684
MF_GP_hyperparameters_covSEiso_covPeriodic_covNoise_1_200_first.logh1	MF_GP_hyperparameters_covSEiso_covPeriodic_covNoise_1_200_first_logh1	model,GaussianProcess	6494	983	0.320622	0.00138651	0.320622
CO_CompareMinAMI_even_2_80.std	CO_CompareMinAMI_even_2_80_std	correlation,AMI	474	719	0.32052	0.0017056	0.32052
SY_SlidingWindow_m_ent10_10	SY_SlidingWindow_m_ent10_10	stationarity	580	307	0.320255	0.00106923	0.320255
NL_MS_nlpe_3_ac.p1_5	NL_MS_nlpe_3_ac_p1_5	nonlinear,prediction,model	6861	1005	-0.320177	0.00106923	0.320177
CO_CompareMinAMI_quantiles_2_80.std	CO_CompareMinAMI_quantiles_2_80_std	correlation,AMI	463	718	0.319891	0.0017056	0.319891
NL_TISEAN_c1_1_2_6_25_01.bestestdstd	NL_TISEAN_c1_1_2_6_25_01_bestestdstd	nonlinear,tisean,dimension,entropy	5069	923	-0.31973	0.000419841	0.31973
CO_AddNoise_ac_std1_10.ami_at_15	CO_AddNoise_ac_std1_10_ami_at_15	correlation,AMI,entropy	1248	726	0.319723	0.000419841	0.319723
FC_LocalSimple_meantau.sws	FC_LocalSimple_meantau_sws	forecasting	3031	837	-0.319701	0.00819075	0.319701
WL_cwt_db3_32.pcross_maxssc50	WL_cwt_db3_32_pcross_maxssc50	wavelet,cwt	6603	989	0.319447	0.0186431	0.319447
HT_DistributionTest_ks_norm	HT_DistributionTest_ks_norm	hypothesistest,distribution,ks,raw	1008	628	0.319354	0.00957229	0.319354
SY_LocalGlobal_l100.skewness	SY_LocalGlobal_skewness_l100	stationarity	817	498	0.318968	0.00875623	0.318968
CO_tc3_mi.denom	CO_tc3_mi_denom	correlation,nonlinear	1118	707	0.318949	0.00106923	0.318949
PP_Compare_resample_1_2.swms5_2	PP_Compare_resample_1_2_swms5_2	preprocessing,raw,stationarity	6383	977	-0.31877	0.000737727	0.31877
PP_Compare_sin2.kscn_relent	PP_Compare_sin2_kscn_relent	preprocessing,raw	5997	964	0.318558	0.00706045	0.318558
CP_ML_StepDetect_l1pwc_10.maxstepint	CP_ML_StepDetect_l1pwc_10_maxstepint	stepdetection	7777	1052	-0.318315	0.0017056	0.318315
HT_DistributionTest_chi2norm100	HT_DistributionTest_chi2norm100	hypothesistest,distribution,raw	967	587	0.318106	0.0104165	0.318106
PP_Compare_rav2.olbt_m2	PP_Compare_rav2_olbt_m2	preprocessing,raw	6279	973	0.317854	0.000419841	0.317854
SB_MotifThree_quantile.baa	SB_MotifThree_quantile_baa	symbolic,motifs	3614	881	0.317445	0.00202739	0.317445
PP_Compare_medianf10.swss2_2	PP_Compare_medianf10_swss2_2	preprocessing,raw,stationarity	6231	972	0.317242	0.0112521	0.317242
EN_mse_1-10_2_015.sampen_s8	EN_mse_1-10_2_015_sampen_s8	entropy,sampen,mse	2753	827	0.317161	0.00233709	0.317161
PH_ForcePotential_sine_10_004_10.pcross	PH_ForcePotential_sine_10_004_10_pcross	dynamicalSystem	1669	751	-0.31708	0.000737727	0.31708
FC_LocalSimple_median7.gofr2	FC_LocalSimple_median7_gofr2	forecasting	3084	841	0.317064	0.015252	0.317064
NL_TSTL_dimensions_50_ac_fnnmar.bc_lfitmeansqdevmax	NL_TSTL_dimensions_50_ac_fnnmar_bc_lfitmeansqdevmax	nonlinear,tstool,scaling,dimension	5352	932	0.317063	0.00649604	0.317063
DN_Quantile_4	quantile_4	distribution	66	63	-0.316927	0.000419841	0.316927
NL_MS_nlpe_2_mi.sbc1	NL_MS_nlpe_2_mi_sbc1	nonlinear,prediction,model	6852	1004	-0.316861	0.00324615	0.316861
NL_TSTL_dimensions_50_ac_fnnmar.co_minm3	NL_TSTL_dimensions_50_ac_fnnmar_co_minm3	nonlinear,tstool,scaling,dimension	5359	932	0.316475	0.000737727	0.316475
PP_Compare_medianf10.swms5_2	PP_Compare_medianf10_swms5_2	preprocessing,raw,stationarity	6228	972	-0.315868	0.000737727	0.315868
FC_LoopLocalSimple_mean.sws_meansgndiff	FC_LoopLocalSimple_mean_sws_meansgndiff	forecasting	3043	838	-0.315814	0.0109813	0.315814
SB_TransitionpAlphabet_20_ac.trcovfexp_b	SB_TransitionpAlphabet_20_ac_trcovfexp_b	symbolic,transitionmat	1498	740	-0.315601	0.000419841	0.315601
NL_MS_nlpe_2_mi.dwts	NL_MS_nlpe_2_mi_dwts	nonlinear,prediction,model	6849	1004	0.315565	0.00138651	0.315565
SY_SlidingWindow_ac1_s5_2	SY_SlidingWindow_ac1_s5_2	stationarity	722	449	-0.315493	0.0219116	0.315493
FC_Surprise_T1_50_tau_m2quad_500.tstat	FC_Surprise_T1_50_tau_m2quad_500_tstat	information,symbolic	2501	808	-0.31545	0.00202739	0.31545
PP_Compare_rav4.swss2_2	PP_Compare_rav4_swss2_2	preprocessing,raw,stationarity	6324	975	0.315416	0.0115059	0.315416
PP_Compare_medianf4.swms5_2	PP_Compare_medianf4_swms5_2	preprocessing,raw,stationarity	6197	971	-0.315366	0.000737727	0.315366
PP_Compare_rav3.statav8	PP_Compare_rav3_statav8	preprocessing,raw,stationarity	6286	974	-0.315342	0.000737727	0.315342
NL_MS_nlpe_2_mi.ac1	NL_MS_nlpe_2_mi_ac1	nonlinear,prediction,model	6839	1004	-0.315337	0.00138651	0.315337
CO_Embed2_Basic_1.incircle_3	CO_Embed2_Basic_1_incircle_3	correlation	1552	742	-0.315304	0.0141833	0.315304
TSTL_localdensity_5_40_ac_fnnmar.minden	TSTL_localdensity_5_40_ac_fnnmar_minden	nonlinear,tstool	5500	938	0.315038	0.014991	0.315038
HT_DistributionTest_chi2norm50	HT_DistributionTest_chi2norm50	hypothesistest,distribution,raw	966	586	0.315033	0.0112521	0.315033
PP_Compare_rav3.statav10	PP_Compare_rav3_statav10	preprocessing,raw,stationarity	6287	974	-0.31503	0.00106923	0.31503
MF_GP_FitAcross_covSEiso_covNoise_20.h_lonN	MF_GP_FitAcross_covSEiso_covNoise_20_h_lonN	model,GaussianProcess	6584	988	-0.314962	0.000419841	0.314962
SD_TSTL_surrogates_mi_100_3_trev.normpatponmax	SD_TSTL_surrogates_mi_100_3_trev_normpatponmax	nonlinear,tstool,correlation,surrogate	5873	960	0.314753	0.0128399	0.314753
MF_arfit_1_8_sbc.pcorr_res	MF_arfit_1_8_sbc_pcorr_res	modelfit,arfit	6787	1002	-0.314628	0.00875623	0.314628
CO_CompareMinAMI_std2_2_80.std	CO_CompareMinAMI_std2_2_80_std	correlation,AMI	485	720	0.314479	0.0017056	0.314479
SD_TSTL_surrogates_mi_100_1_tc3.iqrsfrommedian	SD_TSTL_surrogates_mi_100_1_tc3_iqrsfrommedian	nonlinear,tstool,correlation,surrogate	5804	950	-0.314319	0.00957229	0.314319
SY_SlidingWindow_mom4_s10_1	SY_SlidingWindow_mom4_s10_1	stationarity	678	405	-0.313643	0.0101376	0.313643
SY_SpreadRandomLocal_100_100.meankurt	SY_SpreadRandomLocal_100_100_meankurt	stationarity	2130	479	-0.312961	0.0115059	0.312961
NL_MS_nlpe_3_ac.normksstat	NL_MS_nlpe_3_ac_normksstat	nonlinear,prediction,model	6880	1005	-0.312891	0.0026422	0.312891
SY_SlidingWindow_m_ent10_1	SY_SlidingWindow_m_ent10_1	stationarity	578	305	0.312884	0.00138651	0.312884
CO_Embed2_Basic_1.downdiag01	CO_Embed2_Basic_1_downdiag01	correlation	1528	742	-0.312807	0.00324615	0.312807
SY_LocalDistributions_2_each	SY_LocalDistributions_2_each	stationarity	757	490	-0.312556	0.013102	0.312556
PH_Walker_prop_05.w_median	PH_Walker_prop_05_w_median	trend	2539	812	0.312472	0.000737727	0.312472
DN_RemovePoints_min_08.ac2rat	DN_RemovePoints_min_08_ac2rat	correlation,outliers	1752	759	-0.312471	0.00819075	0.312471
DN_CompareKSFit_exp.adiff	DN_CompareKSFit_exp_adiff	distribution,ksdensity,raw,locdep,spreaddep,posOnly	3198	859	0.312345	0.00106923	0.312345
PP_Compare_sin2.swms2_2	PP_Compare_sin2_swms2_2	preprocessing,raw,stationarity	5978	964	-0.312324	0.00202739	0.312324
EN_mse_1-10_2_015.sampen_s9	EN_mse_1-10_2_015_sampen_s9	entropy,sampen,mse	2754	827	0.312323	0.0026422	0.312323
DN_OutlierInclude_abs_001.xcmerr1	DN_OutlierInclude_abs_001_xcmerr1	distribution,outliers	3238	863	-0.312274	0.00677932	0.312274
CO_Embed2_Basic_1.downdiag05	CO_Embed2_Basic_1_downdiag05	correlation	1529	742	-0.311762	0.00475654	0.311762
EN_Randomize_statdist.swss5_1diff	EN_Randomize_statdist_swss5_1diff	entropy,slow,stationarity	2861	830	-0.311671	0.00875623	0.311671
MF_CompareAR_1_10_all.meandiff	MF_CompareAR_1_10_all_meandiff	model	7368	1028	-0.311615	0.00763437	0.311615
SY_LocalGlobal_p05.absmean	SY_LocalGlobal_absmean_p05	stationarity	764	501	0.31146	0.0017056	0.31146
MF_StateSpaceCompOrder_8.mindiffaic	MF_StateSpaceCompOrder_8_mindiffaic	model	7244	1024	0.31126	0.0223988	0.31126
PP_Compare_rav10.swms10_1	PP_Compare_rav10_swms10_1	preprocessing,raw,stationarity	6353	976	-0.311125	0.00233709	0.311125
SY_LocalDistributions_2_par.meandiv	SY_LocalDistributions_2_par_meandiv	stationarity	2188	486	-0.310809	0.0144662	0.310809
CP_ML_StepDetect_l1pwc_005.meanerrstepint	CP_ML_StepDetect_l1pwc_005_meanerrstepint	stepdetection	7789	1053	0.310735	0.00138651	0.310735
WL_cwt_sym2_32.std_ssc	WL_cwt_sym2_32_std_ssc	wavelet,cwt	6630	990	-0.31038	0.0216716	0.31038
SY_SpreadRandomLocal_200_100.meanstd	SY_SpreadRandomLocal_200_100_meanstd	stationarity	2144	480	-0.310341	0.00233709	0.310341
SY_LocalDistributions_2_par.mindiv	SY_LocalDistributions_2_par_mindiv	stationarity	2189	486	-0.310303	0.014991	0.310303
HT_DistributionTest_ks_logn	HT_DistributionTest_ks_logn	hypothesistest,distribution,ks,raw,locdep,posOnly	1015	635	0.310152	0.0120298	0.310152
PP_Compare_resample_2_1.kscn_adiff	PP_Compare_resample_2_1_kscn_adiff	preprocessing,raw	6427	978	0.309983	0.0216716	0.309983
HT_DistributionTest_chi2gam100	HT_DistributionTest_chi2gam100	hypothesistest,distribution,raw,locdep,posOnly	997	617	0.309854	0.013102	0.309854
CO_Embed2_AngleTau_50.max_thetaac2	CO_Embed2_AngleTau_50_max_thetaac2	correlation,embedding	1947	768	-0.309762	0.000419841	0.309762
HT_DistributionTest_ks_gam	HT_DistributionTest_ks_gam	hypothesistest,distribution,ks,raw,locdep,posOnly	1014	634	0.309743	0.0125708	0.309743
ST_LocalExtrema_n100.maxabsext	ST_LocalExtrema_n100_maxabsext	distribution,stationarity	3419	870	-0.309695	0.00734991	0.309695
DN_OutlierInclude_n_001.mfexprmse	DN_OutlierInclude_n_001_mfexprmse	distribution,outliers	3284	865	-0.309688	0.00138651	0.309688
CO_AddNoise_ac_std1_10.ami_at_20	CO_AddNoise_ac_std1_10_ami_at_20	correlation,AMI,entropy	1249	726	0.309678	0.000419841	0.309678
PP_Compare_sin2.olbt_m5	PP_Compare_sin2_olbt_m5	preprocessing,raw	6001	964	-0.309647	0.00138651	0.309647
PP_Compare_resample_2_1.swss5_1	PP_Compare_resample_2_1_swss5_1	preprocessing,raw,stationarity	6418	978	0.309498	0.0204056	0.309498
SY_SlidingWindow_mom4_ent5_2	SY_SlidingWindow_mom4_ent5_2	stationarity	690	417	-0.309442	0.0117632	0.309442
SB_MotifThree_quantile.aab	SB_MotifThree_quantile_aab	symbolic,motifs	3606	881	0.309269	0.00202739	0.309269
DN_RemovePoints_min_08.sumabsacfdiff	DN_RemovePoints_min_08_sumabsacfdiff	correlation,outliers	1756	759	0.309135	0.0041592	0.309135
SY_SlidingWindow_mom4_sampen10_2	SY_SlidingWindow_mom4_sampen10_2	stationarity	684	411	0.30876	0.00324615	0.30876
WL_coeffs_db3_2.wb1m	WL_coeffs_db3_2_wb1m	wavelet	6675	994	0.308738	0.00563844	0.308738
EN_Randomize_dyndist.swss5_1diff	EN_Randomize_dyndist_swss5_1diff	entropy,slow,stationarity	2924	831	-0.308445	0.0123064	0.308445
SY_LocalDistributions_3_par.stddiv	SY_LocalDistributions_3_par_stddiv	stationarity	2194	487	-0.308378	0.0178584	0.308378
PP_Compare_diff2.swms5_2	PP_Compare_diff2_swms5_2	preprocessing,raw,stationarity	6135	969	-0.308294	0.00138651	0.308294
SY_LocalGlobal_p05.iqr	SY_LocalGlobal_iqr_p05	stationarity	806	501	-0.308247	0.0157431	0.308247
SY_SlidingWindow_ent_ent5_1	SY_SlidingWindow_ent_ent5_1	stationarity	620	347	-0.308158	0.0115059	0.308158
WL_DetailCoeffs_db3_max.std_median	WL_DetailCoeffs_db3_max_std_median	wavelet	6644	992	-0.307922	0.00324615	0.307922
HT_DistributionTest_chi2gam50	HT_DistributionTest_chi2gam50	hypothesistest,distribution,raw,locdep,posOnly	996	616	0.307654	0.0147357	0.307654
SY_LocalDistributions_3_each.stddiv	SY_LocalDistributions_3_each_stddiv	stationarity	2206	491	-0.30764	0.0183929	0.30764
NL_TSTL_ReturnTime_5_1_40_n1_1_8.rangecgdist	NL_TSTL_ReturnTime_5_1_40_n1_1_8_rangecgdist	nonlinear,tstool	5774	947	0.307549	0.00295429	0.307549
EN_mse_1-10_2_015.cvSampEn	EN_mse_1-10_2_015_cvSampEn	entropy,sampen,mse	2762	827	-0.307488	0.00233709	0.307488
SY_SlidingWindow_m_s_7_1	StatAv7	stationarity,StatAv	557	284	0.307458	0.00324615	0.307458
PP_Compare_spline44.olbt_s2	PP_Compare_spline44_olbt_s2	preprocessing,raw	6064	966	-0.307261	0.000419841	0.307261
HT_DistributionTest_chi2logn100	HT_DistributionTest_chi2logn100	hypothesistest,distribution,raw,locdep,posOnly	1002	622	0.307171	0.0154844	0.307171
PP_Compare_rav4.statav8	PP_Compare_rav4_statav8	preprocessing,raw,stationarity	6317	975	-0.307108	0.00138651	0.307108
PH_Walker_runningvar_15_50.w_min	PH_Walker_runningvar_15_50_w_min	trend	2684	819	-0.307106	0.000419841	0.307106
DN_RemovePoints_absclose_08.ac3rat	DN_RemovePoints_absclose_08_ac3rat	correlation,outliers	1701	754	0.306873	0.00233709	0.306873
DN_OutlierInclude_n_001.nflr2	DN_OutlierInclude_n_001_nflr2	distribution,outliers	3291	865	0.30678	0.0017056	0.30678
FC_Surprise_dist_10_tau_m2quad_500.tstat	FC_Surprise_dist_10_tau_m2quad_500_tstat	information,symbolic	2463	803	-0.306703	0.00385458	0.306703
PP_Compare_sin1.swss10_1	PP_Compare_sin1_swss10_1	preprocessing,raw,stationarity	5955	963	-0.306697	0.00106923	0.306697
PP_Compare_rav2.statav6	PP_Compare_rav2_statav6	preprocessing,raw,stationarity	6254	973	-0.306589	0.00202739	0.306589
SC_FluctAnal_2_iqr_50_logi.ratsplitminerr	SC_FluctAnal_2_iqr_50_logi_ratsplitminerr	scaling	3989	896	-0.306275	0.00233709	0.306275
PP_Compare_resample_2_1.gauss1_kd_rmse	PP_Compare_resample_2_1_gauss1_kd_rmse	preprocessing,raw	6423	978	-0.30591	0.0293233	0.30591
[truncated: 4,442 more rows]

## Sheet: description
code name	description(obtained from hctsa manual: https://hctsa-users.gitbook.io/hctsa-manual/list-of-included-code-files)
DN_Burstiness	Burstiness statistic of a time series.
DN_CompareKSFit	Fits a distribution to data.
DN_CustomSkewness	Custom skewness measures.
DN_FitKernelSmooth	Statistics of a kernel-smoothed distribution of the data.
DN_Fit_mle	Maximum likelihood distribution fit to data.
DN_HighLowMu	The highlowmu statistic.
DN_HistogramMode	Mode of a data vector.
DN_Mean	A given measure of location of a data vector.
DN_MinMax	The maximum and minimum values of the input data vector
DN_Moments	A moment of the distribution of the input time series.
DN_OutlierInclude	How statistics depend on distributional outliers.
DN_OutlierTest	How distributional statistics depend on distributional outliers.
DN_ProportionValues	Proportion of values in a time-series vector.
DN_Quantile	Quantiles of the distribution of values in the time series data vector.
DN_RemovePoints	How time-series properties change as points are removed.
DN_SimpleFit	Fit distributions or simple time-series models to the data.
DN_Spread	Measure of spread of the input time series.
DN_TrimmedMean	Mean of the trimmed time series using trimmean.
DN_Unique	The proportion of the time series that are unique values.
DN_Withinp	Proportion of data points within p standard deviations of the mean.
DN_cv	Coefficient of variation.
DN_pleft	Distance from the mean at which a given proportion of data are more distant.
EN_DistributionEntropy	Distributional entropy.
HT_DistributionTest	Hypothesis test for distributional fits to a data vector.
CO_AddNoise	Changes in the automutual information with the addition of noise.
CO_AutoCorr	Compute the autocorrelation of an input time series.
CO_AutoCorrShape	How the autocorrelation function changes with the time lag.
CO_Embed2	Statistics of the time series in a 2-dimensional embedding space.
CO_Embed2_AngleTau	Angle autocorrelation in a 2-dimensional embedding space.
CO_Embed2_Basic	Point density statistics in a 2-d embedding space.
CO_Embed2_Dist	Analyzes distances in a 2-d embedding space of a time series.
CO_Embed2_Shapes	Shape-based statistics in a 2-d embedding space.
CO_FirstMin	Time of first minimum in a given correlation function.
CO_FirstZero	The first zero-crossing of a given autocorrelation function.
CO_NonlinearAutocorr	A custom nonlinear autocorrelation of a time series.
CO_StickAngles	Analysis of line-of-sight angles between time-series data points.
CO_TranslateShape	Statistics on datapoints inside geometric shapes across the time series.
CO_f1ecac	The 1/e correlation length.
CO_fzcglscf	The first zero-crossing of the generalized self-correlation function.
CO_glscf	The generalized linear self-correlation function of a time series.
CO_tc3	Normalized nonlinear autocorrelation function, tc3.
CO_trev	Normalized nonlinear autocorrelation, trev function of a time series.
DK_crinkle	Computes James Theiler's crinkle statistic.
DK_theilerQ	Computes Theiler's Q statistic.
DK_timerev	Time reversal asymmetry statistic.
NL_embed_PCA	Principal Components analysis of a time series in an embedding space.
CO_RM_AMInformation	Automutual information (Rudy Moddemeijer implementation).
CO_CompareMinAMI	Variability in first minimum of automutual information.
CO_HistogramAMI	The automutual information of the distribution using histograms.
IN_AutoMutualInfoStats	Statistics on automutual information function for a time series.
EN_ApEn	Approximate Entropy of a time series.
EN_CID	Simple complexity measure of a time series.
EN_MS_LZcomplexity	Lempel-Ziv complexity of a n-bit encoding of a time series.
EN_MS_shannon	Approximate Shannon entropy of a time series.
EN_PermEn	Permutation Entropy of a time series.
EN_RM_entropy	Entropy of a time series using Rudy Moddemeijer's code.
EN_Randomize	How time-series properties change with increasing randomization.
EN_SampEn	Sample Entropy of a time series.
EN_mse	Multiscale entropy of a time series.
EN_rpde	Recurrence period density entropy (RPDE).
EN_wentropy	Entropy of time series using wavelets.
MF_ARMA_orders	Compares a range of ARMA models fitted to a time series.
MF_AR_arcov	Fits an AR model of a given order, p.
MF_CompareAR	Compares model fits of various orders to a time series.
MF_CompareTestSets	Robustness of test-set goodness of fit.
MF_ExpSmoothing	Exponential smoothing time-series prediction model.
MF_FitSubsegments	Robustness of model parameters across different segments of a time series.
MF_GARCHcompare	Comparison of GARCH time-series models.
MF_GARCHfit	GARCH time-series modeling.
MF_GP_FitAcross	Gaussian Process time-series modeling for local prediction.
MF_GP_LocalPrediction	Gaussian Process time-series model for local prediction.
MF_GP_hyperparameters	Gaussian Process time-series model parameters and goodness of fit.
MF_StateSpaceCompOrder	Change in goodness of fit across different state space models.
MF_StateSpace_n4sid	State space time-series model fitting.
MF_arfit	Statistics of a fitted AR model to a time series.
MF_armax	Statistics on a fitted ARMA model.
MF_hmm_CompareNStates	Hidden Markov Model (HMM) fitting to a time series.
MF_hmm_fit	Fits a Hidden Markov Model to sequential data.
MF_steps_ahead	Goodness of model predictions across prediction lengths.
FC_LocalSimple	Simple local time-series forecasting.
FC_LoopLocalSimple	How simple local forecasting depends on window length.
FC_Surprise	How surprised you would be of the next data point given recent memory.
PP_ModelFit	Investigates whether AR model fit improves with different preprocessings.
SY_DriftingMean	Mean and variance in local time-series subsegments.
SY_DynWin	How stationarity estimates depend on the number of time-series subsegments.
SY_KPSStest	The KPSS stationarity test.
SY_LocalDistributions	Compares the distribution in consecutive time-series segments.
SY_LocalGlobal	Compares local statistics to global statistics of a time series.
SY_PPtest	Phillips-Peron unit root test.
SY_RangeEvolve	How the time-series range changes across time.
SY_SlidingWindow	Sliding window measures of stationarity.
SY_SpreadRandomLocal	Bootstrap-based stationarity measure.
SY_StatAv	Simple mean-stationarity metric, StatAv.
SY_StdNthDer	Standard deviation of the nth derivative of the time series.
SY_StdNthDerChange	How the output of SY_StdNthDer changes with order parameter.
SY_TISEAN_nstat_z	Cross-forecast errors of zeroth-order time-series models.
SY_VarRatioTest	Variance ratio test for random walk.
CP_ML_StepDetect	Analysis of discrete steps in a time series.
CP_l1pwc_sweep_lambda	Dependence of step detection on regularization parameter.
CP_wavelet_varchg	Variance change points in a time series.
NL_BoxCorrDim	Correlation dimension of a time series.
NL_DVV	Delay Vector Variance method for real and complex signals.
NL_MS_fnn	False nearest neighbors of a time series.
NL_MS_nlpe	Normalized drop-one-out constant interpolation nonlinear prediction error.
NL_TISEAN_c1	Information dimension.
NL_TISEAN_d2	d2 routine from the TISEAN package.
NL_TISEAN_fnn	False nearest neighbors of a time series.
NL_TSTL_FractalDimensions	Fractal dimension spectrum, D(q), of a time series.
NL_TSTL_GPCorrSum	Correlation sum scaling by Grassberger-Proccacia algorithm.
NL_TSTL_LargestLyap	Largest Lyapunov exponent of a time series.
NL_TSTL_PoincareSection	Poincare sectino analysis of a time series.
NL_TSTL_ReturnTime	Analysis of the histogram of return times.
NL_TSTL_TakensEstimator	Taken's estimator for correlation dimension.
NL_TSTL_acp	acp function in TSTOOL
NL_TSTL_dimensions	Box counting, information, and correlation dimension of a time series.
NL_crptool_fnn	Analyzes the false-nearest neighbors statistic.
SD_SurrogateTest	Analyzes test statistics obtained from surrogate time series.
SD_TSTL_surrogates	Surrogate time-series analysis.
TSTL_delaytime	Optimal delay time using the method of Parlitz and Wichard.
TSTL_localdensity	Local density estimates in the time-delay embedding space.
SC_MMA	Physionet implementation of multiscale multifractal analysis
SC_fastdfa	Matlab wrapper for Max Little's ML_fastdfa code
SC_FluctAnal	Implements fluctuation analysis by a variety of methods.
SP_Summaries	Statistics of the power spectrum of a time series.
DT_IsSeasonal	A simple test of seasonality.
PD_PeriodicityWang	Periodicity extraction measure of Wang et al.
WL_DetailCoeffs	Detail coefficients of a wavelet decomposition.
WL_coeffs	Wavelet decomposition of the time series.
WL_cwt	Continuous wavelet transform of a time series.
WL_dwtcoeff	Discrete wavelet transform coefficients.
WL_fBM	Parameters of fractional Gaussian noise/Brownian motion in a time series.
WL_scal2frq	Frequency components in a periodic time series.
SB_BinaryStats	Statistics on a binary symbolization of the time series.
SB_BinaryStretch	Characterizes stretches of 0/1 in time-series binarization.
SB_MotifThree	Motifs in a coarse-graining of a time series to a 3-letter alphabet.
SB_MotifTwo	Local motifs in a binary symbolization of the time series.
SB_TransitionMatrix	Transition probabilities between different time-series states.
SB_TransitionpAlphabet	How transition probabilities change with alphabet size.
MD_hrv_classic	Classic heart rate variability (HRV) statistics.
MD_pNN	pNNx measures of heart rate variability.
MD_polvar	The POLVARd measure of a time series.
MD_rawHRVmeas	Heart rate variability (HRV) measures of a time series.
SY_Trend	Quantifies various measures of trend in a time series.
ST_FitPolynomial	Goodness of a polynomial fit to a time series.
ST_Length	Length of an input data vector.
ST_LocalExtrema	How local maximums and minimums vary across the time series.
ST_MomentCorr	Correlations between simple statistics in local windows of a time series.
ST_SimpleStats	Basic statistics about an input time series.
EX_MovingThreshold	Moving threshold model for extreme events in a time series.
HT_HypothesisTest	Statistical hypothesis test applied to a time series.
NW_VisibilityGraph	Visibility graph analysis of a time series.
PH_ForcePotential	Couples the values of the time series to a dynamical system.
PH_Walker	Simulates a hypothetical walker moving through the time domain.
PP_Compare	Compare how time-series properties change after pre-processing.
PP_Iterate	How time-series properties change in response to iterative pre-processing.
