# Supplementary figures and images for: Topographic gradients of intrinsic dynamics across neocortex
Source: eLife journal article supplement (doi:10.7554/elife.62116), 2020-12-17

original

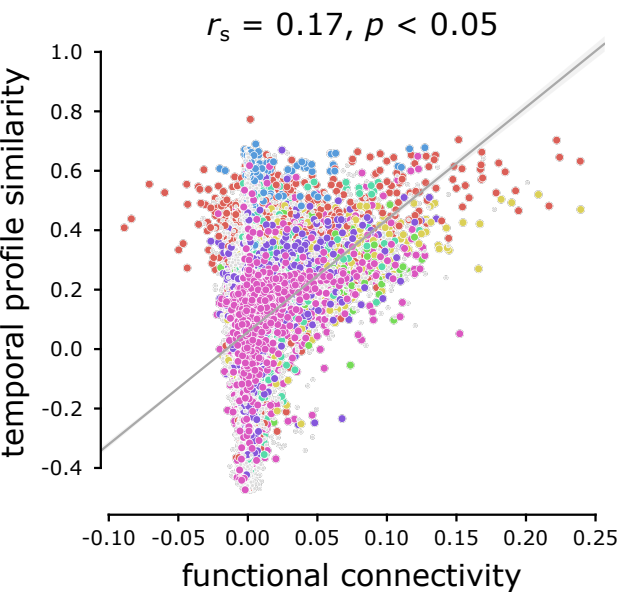

distance-corrected

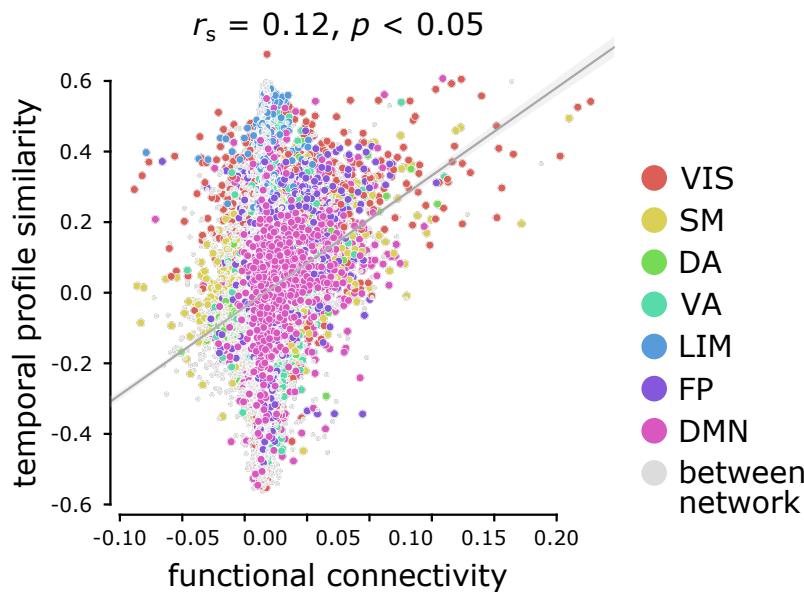

Supplement: supp [file elife_poa_e62116_Figure_2_figure_supplement_2.pdf › elife_poa_e62116_Figure_2_figure_supplement_2.pdf]

lag-1

lag-10

lag-15

lag-20

lag-25

lag-30

lag-40

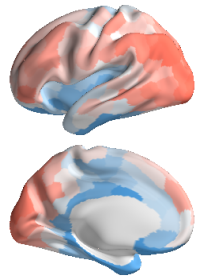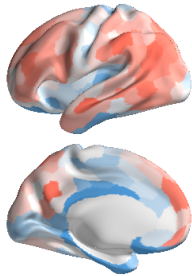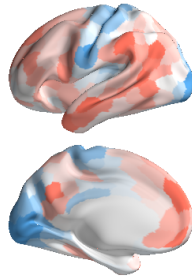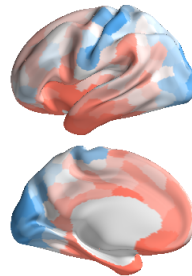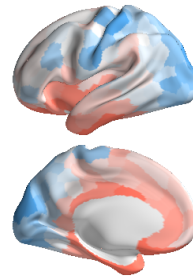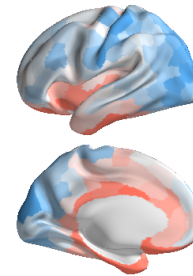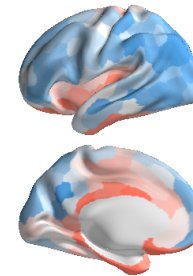

0.06 0.91

0.26 0.67

0.35 0.62

0.33 0.63

0.33 0.67

0.37 0.67

0.41 0.64

Supplement: supp [file elife_poa_e62116_Figure_3_figure_supplement_1.pdf › elife_poa_e62116_Figure_3_figure_supplement_1.pdf]

## a | intrinsic networks

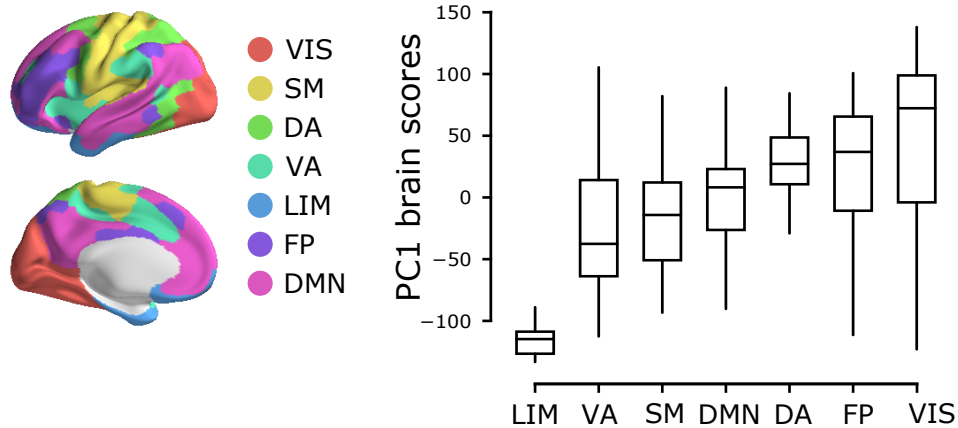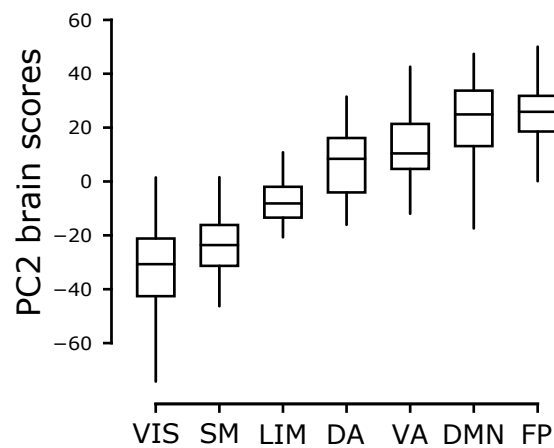

## b | cytoarchitectonic classes

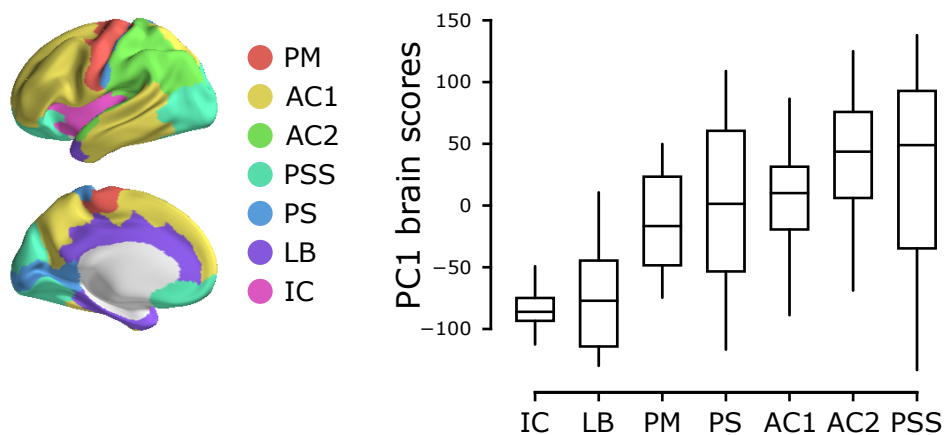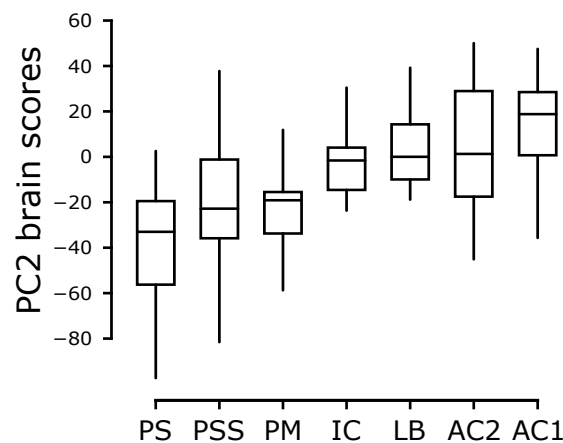

## c | laminar differentiation levels

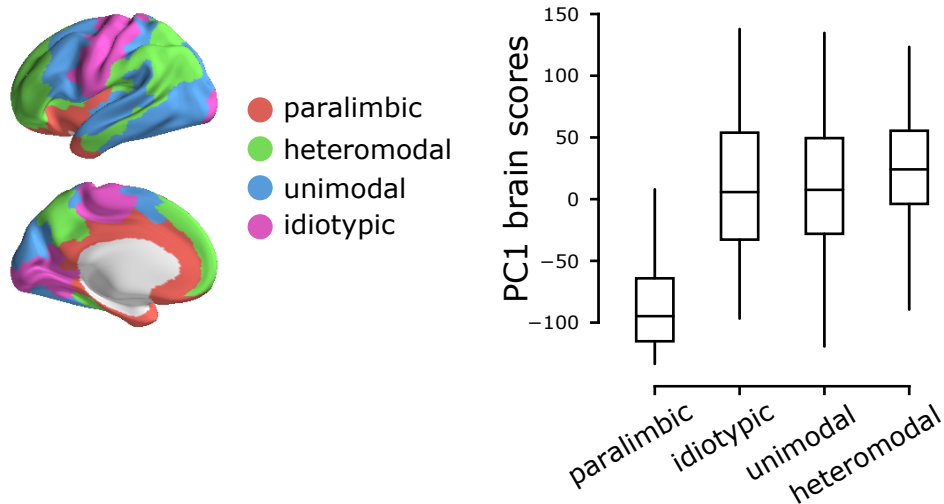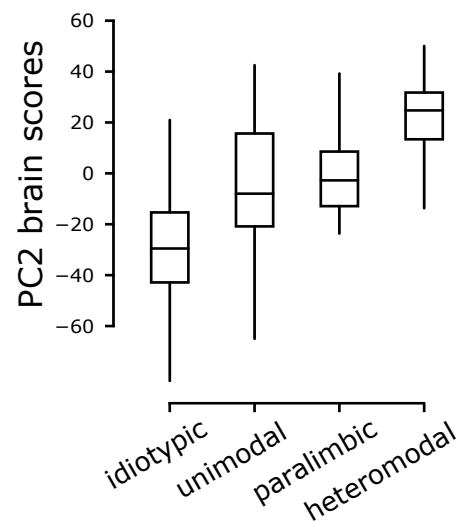

Supplement: supp [file elife_poa_e62116_Figure_4_figure_supplement_1.pdf › elife_poa_e62116_Figure_4_figure_supplement_1.pdf]

evolutionary expansion

participation coefficient

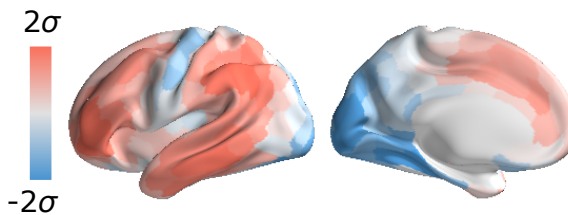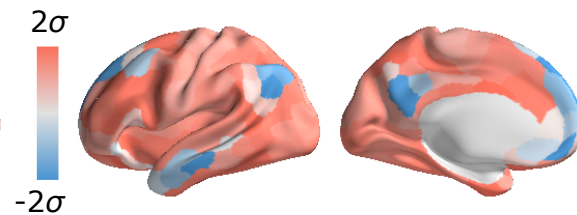

PC1 score

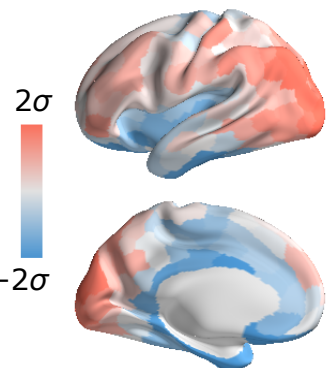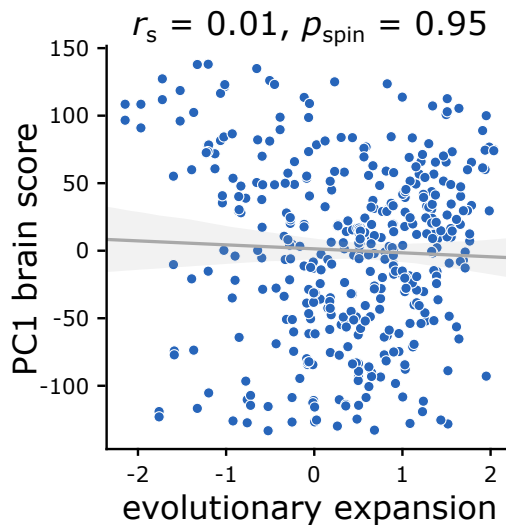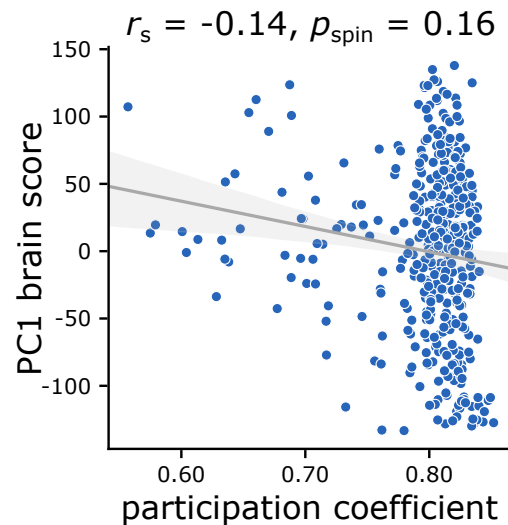

PC2 score

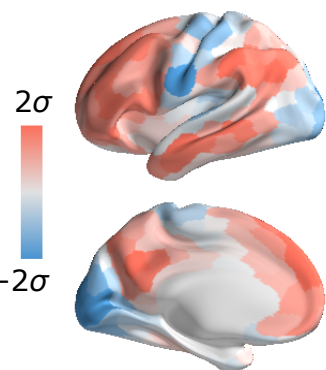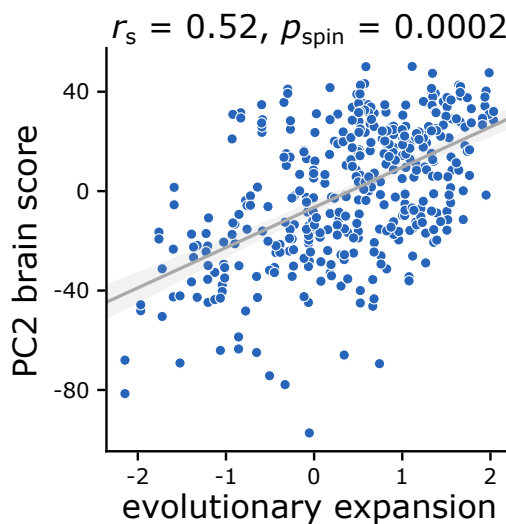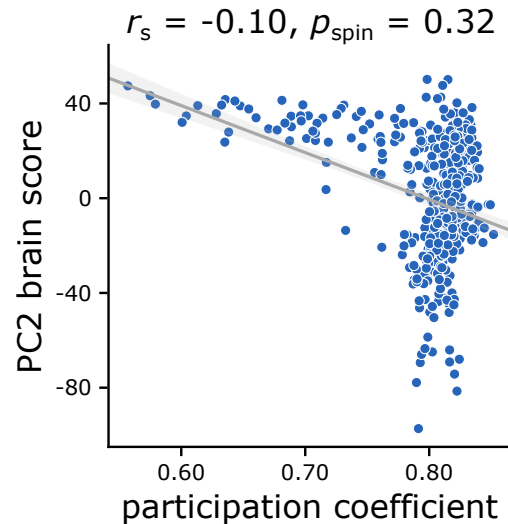

Supplement: supp [file elife_poa_e62116_Figure_4_figure_supplement_2.pdf › elife_poa_e62116_Figure_4_figure_supplement_2.pdf]
